# Supplementary material
Source: publisher figshare collection journal article supplement (https://acs.figshare.com/ndownloader/files/7362784)
Supplement: Supplementary file 1 [file 7362784]

data_1
#2133GuillotICMMO

_database_code_CSD         'CCDC 1448438'

_publ_requested_journal          Inorg.Chem.
_publ_contact_author_name        'Talal Mallah'
_publ_contact_author_address     
;Institut de Chimie Mol\'eculaire et des Mat\'eriaux d'Orsay,
B\^at. 420 Universit\'e Paris-Sud,
UMR CNRS 8182,
91405 ORSAY Cedex,
France.
;
_publ_contact_author_email       talal.mallah@u-psud.fr
loop_
_publ_author_name
_publ_author_address
'Shao, Feng'
;Institut de Chimie Mol\'eculaire et des Mat\'eriaux d'Orsay,
B\^at. 420 Universit\'e Paris-Sud,
UMR CNRS 8182,
91405 ORSAY Cedex,
France.
;
'Cahier, Benjamin'
;Institut de Chimie Mol\'eculaire et des Mat\'eriaux d'Orsay,
B\^at. 420 Universit\'e Paris-Sud,
UMR CNRS 8182,
91405 ORSAY Cedex,
France.
;
'Guih\'ery, Nathalie'
;Laboratoire de Chimie et Physique Quantiques,
Universit\'e de Toulouse III,
118 route de Narbonne,
31062 Toulouse,
France.
;
'Rivi\`ere, Eric'
;Institut de Chimie Mol\'eculaire et des Mat\'eriaux d'Orsay,
B\^at. 420 Universit\'e Paris-Sud,
UMR CNRS 8182,
91405 ORSAY Cedex,
France.
;
'Guillot, R\'egis'
;Institut de Chimie Mol\'eculaire et des Mat\'eriaux d'Orsay,
B\^at. 420 Universit\'e Paris-Sud,
UMR CNRS 8182,
91405 ORSAY Cedex,
France.
;
'Campbell, Victoria E.'
;Institut de Chimie Mol\'eculaire et des Mat\'eriaux d'Orsay,
B\^at. 420 Universit\'e Paris-Sud,
UMR CNRS 8182,
91405 ORSAY Cedex,
France.
;
'Mallah, Talal'
;Institut de Chimie Mol\'eculaire et des Mat\'eriaux d'Orsay,
B\^at. 420 Universit\'e Paris-Sud,
UMR CNRS 8182,
91405 ORSAY Cedex,
France.
;

# ICMMO Feng LCI FS2087D

_audit_creation_method           SHELXL-2013
_chemical_name_systematic        
;
 ?
;
_chemical_name_common            ?
_chemical_melting_point          ?
_chemical_formula_moiety         'C18 H39 Cl Co N S3, Cl O4 '
_chemical_formula_sum            'C18 H39 Cl2 Co N O4 S3'
_chemical_formula_weight         559.51

loop_
_atom_type_symbol
_atom_type_description
_atom_type_scat_dispersion_real
_atom_type_scat_dispersion_imag
_atom_type_scat_source
C C 0.0031 0.0016 'International Tables Vol C Tables 4.2.6.8 and 6.1.1.4'
H H 0.0000 0.0000 'International Tables Vol C Tables 4.2.6.8 and 6.1.1.4'
N N 0.0061 0.0033 'International Tables Vol C Tables 4.2.6.8 and 6.1.1.4'
O O 0.0109 0.0061 'International Tables Vol C Tables 4.2.6.8 and 6.1.1.4'
S S 0.1250 0.1239 'International Tables Vol C Tables 4.2.6.8 and 6.1.1.4'
Cl Cl 0.1480 0.1591 'International Tables Vol C Tables 4.2.6.8 and 6.1.1.4'
Co Co 0.3490 0.9758 'International Tables Vol C Tables 4.2.6.8 and 6.1.1.4'

_space_group_crystal_system      monoclinic
_space_group_IT_number           14
_space_group_name_H-M_alt        'P 21/c'
_space_group_name_Hall           '-P 2ybc'

_shelx_space_group_comment       
;
The symmetry employed for this shelxl refinement is uniquely defined
by the following loop, which should always be used as a source of
symmetry information in preference to the above space-group names.
They are only intended as comments.
;

loop_
_space_group_symop_operation_xyz
'x, y, z'
'-x, y+1/2, -z+1/2'
'-x, -y, -z'
'x, -y-1/2, z-1/2'

_cell_length_a                   15.2642(5)
_cell_length_b                   10.9170(3)
_cell_length_c                   17.0452(5)
_cell_angle_alpha                90
_cell_angle_beta                 115.0890(10)
_cell_angle_gamma                90
_cell_volume                     2572.41(13)
_cell_formula_units_Z            4
_cell_measurement_temperature    100(1)
_cell_measurement_reflns_used    9918
_cell_measurement_theta_min      2.28
_cell_measurement_theta_max      30.21

_exptl_crystal_description       bloc
_exptl_crystal_colour            purple
_exptl_crystal_density_meas      ?
_exptl_crystal_density_method    ?
_exptl_crystal_density_diffrn    1.445
_exptl_crystal_F_000             1180
_exptl_transmission_factor_min   ?
_exptl_transmission_factor_max   ?
_exptl_crystal_size_max          0.090
_exptl_crystal_size_mid          0.080
_exptl_crystal_size_min          0.020
_exptl_absorpt_coefficient_mu    1.142
_shelx_estimated_absorpt_T_min   0.909
_shelx_estimated_absorpt_T_max   0.979
_exptl_absorpt_correction_type   multi-scan
_exptl_absorpt_correction_T_min  0.7266
_exptl_absorpt_correction_T_max  0.8461
_exptl_absorpt_process_details   SADABS

_exptl_special_details           
;
 ?
;

_diffrn_ambient_temperature      100(1)
_diffrn_radiation_wavelength     0.71073
_diffrn_radiation_type           MoK\a
_diffrn_radiation_source         'sealed tube'
_diffrn_radiation_monochromator  graphite
_diffrn_measurement_device_type  'Bruker APEX-II CCD'
_diffrn_measurement_method       '\f and \w scans'
_diffrn_detector_area_resol_mean ?
_diffrn_reflns_number            65003
_diffrn_reflns_av_unetI/netI     0.0413
_diffrn_reflns_av_R_equivalents  0.0618
_diffrn_reflns_limit_h_min       -21
_diffrn_reflns_limit_h_max       21
_diffrn_reflns_limit_k_min       -15
_diffrn_reflns_limit_k_max       15
_diffrn_reflns_limit_l_min       -23
_diffrn_reflns_limit_l_max       24
_diffrn_reflns_theta_min         2.285
_diffrn_reflns_theta_max         30.594
_diffrn_reflns_theta_full        25.242
_diffrn_measured_fraction_theta_max 0.995
_diffrn_measured_fraction_theta_full 1.000
_diffrn_reflns_Laue_measured_fraction_max 0.995
_diffrn_reflns_Laue_measured_fraction_full 1.000
_diffrn_reflns_point_group_measured_fraction_max 0.995
_diffrn_reflns_point_group_measured_fraction_full 1.000
_reflns_number_total             7856
_reflns_number_gt                6098
_reflns_threshold_expression     'I > 2\s(I)'
_reflns_Friedel_coverage         0.000
_reflns_Friedel_fraction_max     .
_reflns_Friedel_fraction_full    .

_reflns_special_details          
;
 Reflections were merged by SHELXL according to the crystal
 class for the calculation of statistics and refinement.
 
 _reflns_Friedel_fraction is defined as the number of unique
 Friedel pairs measured divided by the number that would be
 possible theoretically, ignoring centric projections and
 systematic absences.
;

_computing_data_collection       'Bruker APEX2'
_computing_cell_refinement       'Bruker SAINT'
_computing_data_reduction        'Bruker SAINT'
_computing_structure_solution    'SHELXS-97 (Sheldrick, 2008)'
_computing_structure_refinement  'SHELXL-2013 (Sheldrick, 2013)'
_computing_molecular_graphics    ?
_computing_publication_material  ?

_refine_special_details          
;
 ?
;
_refine_ls_structure_factor_coef Fsqd
_refine_ls_matrix_type           full
_refine_ls_weighting_scheme      calc
_refine_ls_weighting_details     
'w=1/[\s^2^(Fo^2^)+(0.0240P)^2^+2.4114P] where P=(Fo^2^+2Fc^2^)/3'
_atom_sites_solution_primary     ?
_atom_sites_solution_secondary   ?
_atom_sites_solution_hydrogens   geom
_refine_ls_hydrogen_treatment    constr
_refine_ls_extinction_method     none
_refine_ls_extinction_coef       .
_refine_ls_number_reflns         7856
_refine_ls_number_parameters     271
_refine_ls_number_restraints     0
_refine_ls_R_factor_all          0.0559
_refine_ls_R_factor_gt           0.0367
_refine_ls_wR_factor_ref         0.0811
_refine_ls_wR_factor_gt          0.0732
_refine_ls_goodness_of_fit_ref   1.044
_refine_ls_restrained_S_all      1.044
_refine_ls_shift/su_max          0.001
_refine_ls_shift/su_mean         0.000

loop_
_atom_site_label
_atom_site_type_symbol
_atom_site_fract_x
_atom_site_fract_y
_atom_site_fract_z
_atom_site_U_iso_or_equiv
_atom_site_adp_type
_atom_site_occupancy
_atom_site_site_symmetry_order
_atom_site_calc_flag
_atom_site_refinement_flags_posn
_atom_site_refinement_flags_adp
_atom_site_refinement_flags_occupancy
_atom_site_disorder_assembly
_atom_site_disorder_group
Co1 Co 0.21997(2) 0.75964(2) 0.02066(2) 0.01166(6) Uani 1 1 d . . . . .
S3 S 0.31687(3) 0.94033(4) 0.06586(3) 0.01419(9) Uani 1 1 d . . . . .
Cl1 Cl 0.12660(3) 0.78677(4) 0.09292(3) 0.01839(10) Uani 1 1 d . . . . .
S1 S 0.09286(3) 0.76063(4) -0.12383(3) 0.01648(10) Uani 1 1 d . . . . .
Cl2 Cl 0.66308(4) 0.77572(4) 0.11507(3) 0.02189(10) Uani 1 1 d . . . . .
S2 S 0.29017(3) 0.56768(4) 0.08508(3) 0.01892(10) Uani 1 1 d . . . . .
N1 N 0.31346(12) 0.72874(15) -0.05277(11) 0.0193(3) Uani 1 1 d . . . . .
C5 C 0.36247(14) 0.84409(18) -0.05780(13) 0.0196(4) Uani 1 1 d . . . . .
H5A H 0.3156 0.8976 -0.1004 0.024 Uiso 1 1 calc R U . . .
H5B H 0.4120 0.8252 -0.0775 0.024 Uiso 1 1 calc R U . . .
C16 C 0.42785(15) 0.83470(18) 0.22713(12) 0.0204(4) Uani 1 1 d . . . . .
H16A H 0.4646 0.8463 0.2883 0.031 Uiso 1 1 calc R U . . .
H16B H 0.4690 0.8016 0.2026 0.031 Uiso 1 1 calc R U . . .
H16C H 0.3756 0.7790 0.2173 0.031 Uiso 1 1 calc R U . . .
C3 C 0.38828(15) 0.63441(19) -0.00756(16) 0.0283(5) Uani 1 1 d . . . . .
H3A H 0.4377 0.6701 0.0445 0.034 Uiso 1 1 calc R U . . .
H3B H 0.4188 0.6104 -0.0448 0.034 Uiso 1 1 calc R U . . .
C7 C 0.02048(15) 0.90438(19) -0.15258(14) 0.0255(5) Uani 1 1 d . . . . .
C2 C 0.16321(16) 0.7654(2) -0.18640(13) 0.0323(5) Uani 1 1 d . . . . .
H2A H 0.1250 0.7348 -0.2445 0.039 Uiso 1 1 calc R U . . .
H2B H 0.1820 0.8491 -0.1908 0.039 Uiso 1 1 calc R U . . .
C9 C -0.05629(16) 0.8847(2) -0.11938(16) 0.0313(5) Uani 1 1 d . . . . .
H9A H -0.0932 0.9585 -0.1270 0.047 Uiso 1 1 calc R U . . .
H9B H -0.0258 0.8639 -0.0590 0.047 Uiso 1 1 calc R U . . .
H9C H -0.0984 0.8193 -0.1512 0.047 Uiso 1 1 calc R U . . .
C4 C 0.34793(16) 0.52142(19) 0.01687(17) 0.0312(5) Uani 1 1 d . . . . .
H4A H 0.3997 0.4640 0.0476 0.037 Uiso 1 1 calc R U . . .
H4B H 0.3014 0.4815 -0.0349 0.037 Uiso 1 1 calc R U . . .
C1 C 0.25192(16) 0.6870(2) -0.14194(14) 0.0320(5) Uani 1 1 d . . . . .
H1A H 0.2321 0.6031 -0.1400 0.038 Uiso 1 1 calc R U . . .
H1B H 0.2896 0.6882 -0.1756 0.038 Uiso 1 1 calc R U . . .
C10 C 0.08336(17) 1.0147(2) -0.10985(18) 0.0401(6) Uani 1 1 d . . . . .
H10A H 0.0447 1.0876 -0.1260 0.060 Uiso 1 1 calc R U . . .
H10B H 0.1344 1.0208 -0.1285 0.060 Uiso 1 1 calc R U . . .
H10C H 0.1107 1.0052 -0.0480 0.060 Uiso 1 1 calc R U . . .
C8 C -0.02657(18) 0.9149(3) -0.25127(15) 0.0415(7) Uani 1 1 d . . . . .
H8A H -0.0612 0.8409 -0.2759 0.062 Uiso 1 1 calc R U . . .
H8B H 0.0226 0.9275 -0.2716 0.062 Uiso 1 1 calc R U . . .
H8C H -0.0706 0.9829 -0.2683 0.062 Uiso 1 1 calc R U . . .
C11 C 0.20349(14) 0.44176(17) 0.07348(13) 0.0184(4) Uani 1 1 d . . . . .
C15 C 0.38728(14) 0.95714(17) 0.18466(12) 0.0172(4) Uani 1 1 d . . . . .
C18 C 0.31567(15) 1.00845(18) 0.21654(12) 0.0215(4) Uani 1 1 d . . . . .
H18A H 0.3468 1.0173 0.2784 0.032 Uiso 1 1 calc R U . . .
H18B H 0.2618 0.9535 0.2010 0.032 Uiso 1 1 calc R U . . .
H18C H 0.2931 1.0869 0.1904 0.032 Uiso 1 1 calc R U . . .
C12 C 0.16638(19) 0.4669(2) 0.14179(15) 0.0318(5) Uani 1 1 d . . . . .
H12A H 0.1208 0.4046 0.1391 0.048 Uiso 1 1 calc R U . . .
H12B H 0.1353 0.5455 0.1313 0.048 Uiso 1 1 calc R U . . .
H12C H 0.2196 0.4664 0.1982 0.048 Uiso 1 1 calc R U . . .
C17 C 0.46811(15) 1.0489(2) 0.19978(14) 0.0264(5) Uani 1 1 d . . . . .
H17A H 0.4416 1.1211 0.1659 0.040 Uiso 1 1 calc R U . . .
H17B H 0.5149 1.0130 0.1829 0.040 Uiso 1 1 calc R U . . .
H17C H 0.4988 1.0702 0.2601 0.040 Uiso 1 1 calc R U . . .
C13 C 0.12145(15) 0.4422(2) -0.01664(14) 0.0277(5) Uani 1 1 d . . . . .
H13A H 0.0776 0.3764 -0.0217 0.042 Uiso 1 1 calc R U . . .
H13B H 0.1472 0.4317 -0.0588 0.042 Uiso 1 1 calc R U . . .
H13C H 0.0876 0.5189 -0.0266 0.042 Uiso 1 1 calc R U . . .
C14 C 0.25936(16) 0.32159(19) 0.09238(16) 0.0292(5) Uani 1 1 d . . . . .
H14A H 0.3122 0.3252 0.1489 0.044 Uiso 1 1 calc R U . . .
H14B H 0.2840 0.3084 0.0498 0.044 Uiso 1 1 calc R U . . .
H14C H 0.2171 0.2554 0.0904 0.044 Uiso 1 1 calc R U . . .
C6 C 0.40844(13) 0.91094(18) 0.02759(12) 0.0183(4) Uani 1 1 d . . . . .
H6A H 0.4361 0.9876 0.0201 0.022 Uiso 1 1 calc R U . . .
H6B H 0.4598 0.8616 0.0695 0.022 Uiso 1 1 calc R U . . .
O1 O 0.60398(11) 0.77335(15) 0.02314(10) 0.0302(4) Uani 1 1 d . . . . .
O2 O 0.60535(14) 0.7470(2) 0.15971(14) 0.0650(7) Uani 1 1 d . . . . .
O4 O 0.73910(12) 0.6888(2) 0.13842(12) 0.0498(5) Uani 1 1 d . . . . .
O3 O 0.7008(2) 0.89440(18) 0.13935(13) 0.0883(10) Uani 1 1 d . . . . .

loop_
_atom_site_aniso_label
_atom_site_aniso_U_11
_atom_site_aniso_U_22
_atom_site_aniso_U_33
_atom_site_aniso_U_23
_atom_site_aniso_U_13
_atom_site_aniso_U_12
Co1 0.01154(12) 0.01153(11) 0.01169(11) -0.00067(9) 0.00472(9) -0.00002(9)
S3 0.0134(2) 0.0125(2) 0.0148(2) -0.00024(16) 0.00419(17) -0.00037(16)
Cl1 0.0231(2) 0.0179(2) 0.0196(2) 0.00080(17) 0.01421(19) 0.00189(17)
S1 0.0161(2) 0.0199(2) 0.0120(2) 0.00006(17) 0.00460(17) -0.00084(17)
Cl2 0.0250(2) 0.0167(2) 0.0279(2) 0.00185(18) 0.0150(2) -0.00052(18)
S2 0.0147(2) 0.0124(2) 0.0242(2) -0.00062(18) 0.00295(19) 0.00069(17)
N1 0.0169(8) 0.0176(8) 0.0261(9) -0.0069(7) 0.0116(7) -0.0018(6)
C5 0.0206(10) 0.0192(9) 0.0238(10) -0.0007(8) 0.0141(8) -0.0037(8)
C16 0.0231(10) 0.0163(9) 0.0174(9) 0.0021(7) 0.0044(8) 0.0041(8)
C3 0.0213(10) 0.0185(10) 0.0530(14) -0.0028(9) 0.0232(10) 0.0021(8)
C7 0.0183(10) 0.0205(10) 0.0253(10) 0.0080(8) -0.0027(8) 0.0008(8)
C2 0.0286(12) 0.0568(16) 0.0126(9) -0.0064(10) 0.0099(9) -0.0103(11)
C9 0.0229(11) 0.0269(11) 0.0389(13) 0.0034(10) 0.0079(10) 0.0100(9)
C4 0.0258(11) 0.0151(10) 0.0630(16) -0.0016(10) 0.0287(11) 0.0021(8)
C1 0.0287(12) 0.0456(14) 0.0308(12) -0.0215(10) 0.0215(10) -0.0122(10)
C10 0.0262(12) 0.0177(11) 0.0564(16) 0.0071(11) -0.0018(11) -0.0004(9)
C8 0.0299(13) 0.0488(16) 0.0291(12) 0.0191(11) -0.0036(10) -0.0027(11)
C11 0.0188(9) 0.0142(9) 0.0220(9) 0.0008(7) 0.0085(8) -0.0018(7)
C15 0.0176(9) 0.0135(8) 0.0151(9) -0.0025(7) 0.0017(7) -0.0014(7)
C18 0.0283(11) 0.0162(9) 0.0170(9) -0.0030(7) 0.0068(8) 0.0026(8)
C12 0.0500(15) 0.0205(11) 0.0331(12) 0.0046(9) 0.0256(11) 0.0028(10)
C17 0.0249(11) 0.0213(10) 0.0239(10) -0.0031(8) 0.0015(9) -0.0092(8)
C13 0.0233(11) 0.0282(11) 0.0269(11) 0.0010(9) 0.0061(9) -0.0105(9)
C14 0.0297(12) 0.0136(9) 0.0451(14) 0.0031(9) 0.0167(11) 0.0030(8)
C6 0.0156(9) 0.0170(9) 0.0239(10) 0.0009(7) 0.0101(8) -0.0022(7)
O1 0.0232(8) 0.0350(9) 0.0276(8) -0.0040(7) 0.0061(7) 0.0037(7)
O2 0.0394(11) 0.1071(19) 0.0650(13) 0.0642(13) 0.0379(11) 0.0400(12)
O4 0.0250(9) 0.0762(15) 0.0402(10) -0.0061(10) 0.0060(8) 0.0268(9)
O3 0.162(3) 0.0273(11) 0.0362(11) 0.0004(9) 0.0041(14) -0.0409(14)

_geom_special_details            
;
 All esds (except the esd in the dihedral angle between two l.s. planes)
 are estimated using the full covariance matrix.  The cell esds are taken
 into account individually in the estimation of esds in distances, angles
 and torsion angles; correlations between esds in cell parameters are only
 used when they are defined by crystal symmetry.  An approximate (isotropic)
 treatment of cell esds is used for estimating esds involving l.s. planes.
;

loop_
_geom_bond_atom_site_label_1
_geom_bond_atom_site_label_2
_geom_bond_distance
_geom_bond_site_symmetry_2
_geom_bond_publ_flag
Co1 Cl1 2.2637(5) . ?
Co1 N1 2.2873(16) . ?
Co1 S3 2.3888(5) . ?
Co1 S2 2.3975(5) . ?
Co1 S1 2.4037(5) . ?
S3 C6 1.8042(19) . ?
S3 C15 1.8558(19) . ?
S1 C2 1.807(2) . ?
S1 C7 1.861(2) . ?
Cl2 O3 1.4070(19) . ?
Cl2 O4 1.4190(18) . ?
Cl2 O2 1.4223(18) . ?
Cl2 O1 1.4391(16) . ?
S2 C4 1.804(2) . ?
S2 C11 1.8595(19) . ?
N1 C1 1.480(3) . ?
N1 C5 1.486(2) . ?
N1 C3 1.487(3) . ?
C5 C6 1.509(3) . ?
C16 C15 1.521(3) . ?
C3 C4 1.514(3) . ?
C7 C9 1.517(3) . ?
C7 C10 1.519(3) . ?
C7 C8 1.528(3) . ?
C2 C1 1.506(3) . ?
C11 C13 1.515(3) . ?
C11 C12 1.520(3) . ?
C11 C14 1.523(3) . ?
C15 C18 1.519(3) . ?
C15 C17 1.524(3) . ?

loop_
_geom_angle_atom_site_label_1
_geom_angle_atom_site_label_2
_geom_angle_atom_site_label_3
_geom_angle
_geom_angle_site_symmetry_1
_geom_angle_site_symmetry_3
_geom_angle_publ_flag
Cl1 Co1 N1 179.00(4) . . ?
Cl1 Co1 S3 99.384(18) . . ?
N1 Co1 S3 81.58(4) . . ?
Cl1 Co1 S2 97.319(19) . . ?
N1 Co1 S2 81.97(5) . . ?
S3 Co1 S2 118.602(18) . . ?
Cl1 Co1 S1 97.818(19) . . ?
N1 Co1 S1 81.94(4) . . ?
S3 Co1 S1 116.560(18) . . ?
S2 Co1 S1 118.886(19) . . ?
C6 S3 C15 103.48(9) . . ?
C6 S3 Co1 101.84(6) . . ?
C15 S3 Co1 115.25(6) . . ?
C2 S1 C7 104.80(11) . . ?
C2 S1 Co1 100.45(7) . . ?
C7 S1 Co1 113.87(7) . . ?
O3 Cl2 O4 110.43(16) . . ?
O3 Cl2 O2 108.36(17) . . ?
O4 Cl2 O2 108.72(12) . . ?
O3 Cl2 O1 109.05(11) . . ?
O4 Cl2 O1 110.73(10) . . ?
O2 Cl2 O1 109.51(12) . . ?
C4 S2 C11 104.16(9) . . ?
C4 S2 Co1 101.26(8) . . ?
C11 S2 Co1 115.97(6) . . ?
C1 N1 C5 108.51(17) . . ?
C1 N1 C3 109.43(17) . . ?
C5 N1 C3 108.79(15) . . ?
C1 N1 Co1 109.62(12) . . ?
C5 N1 Co1 110.66(11) . . ?
C3 N1 Co1 109.80(13) . . ?
N1 C5 C6 113.19(16) . . ?
N1 C3 C4 113.22(17) . . ?
C9 C7 C10 111.4(2) . . ?
C9 C7 C8 110.16(18) . . ?
C10 C7 C8 112.0(2) . . ?
C9 C7 S1 104.40(14) . . ?
C10 C7 S1 110.98(14) . . ?
C8 C7 S1 107.61(17) . . ?
C1 C2 S1 108.62(15) . . ?
C3 C4 S2 108.44(15) . . ?
N1 C1 C2 112.69(18) . . ?
C13 C11 C12 111.08(18) . . ?
C13 C11 C14 111.43(18) . . ?
C12 C11 C14 110.52(17) . . ?
C13 C11 S2 110.50(13) . . ?
C12 C11 S2 105.34(14) . . ?
C14 C11 S2 107.76(14) . . ?
C18 C15 C16 111.30(16) . . ?
C18 C15 C17 110.55(16) . . ?
C16 C15 C17 111.10(16) . . ?
C18 C15 S3 104.78(13) . . ?
C16 C15 S3 111.28(13) . . ?
C17 C15 S3 107.60(14) . . ?
C5 C6 S3 108.67(13) . . ?

_refine_diff_density_max         0.767
_refine_diff_density_min         -0.578
_refine_diff_density_rms         0.086

_shelxl_version_number           2013-4

_shelx_res_file                  
;
TITL 2133_0m in P2(1)/c
CELL  0.71073  15.2642  10.9170  17.0452   90.000  115.089   90.000
ZERR     4.00   0.0005   0.0003   0.0005    0.000    0.001    0.000
LATT   1
SYMM  - X, 1/2 + Y, 1/2 - Z
SFAC  C    H    N    O    S    CL   CO
DISP    Co    0.34900    0.97578      3908.53
DISP    Cl    0.14800    0.15912       637.37
DISP    S     0.12501    0.12394       496.43
DISP    O     0.01089    0.00607        24.30
DISP    N     0.00614    0.00330        13.21
DISP    C     0.00313    0.00161         6.46
UNIT  72   156  4    16   12   8    4
MERG   2
FMAP   2
PLAN   20
SIZE     0.020   0.080   0.090
ACTA
BOND
L.S.  20
TEMP    20.00
WGHT    0.024000    2.411400
FVAR       0.09339
MOLE    1
CO1   7    0.219967    0.759637    0.020658    11.00000    0.01154    0.01153 =
         0.01169   -0.00067    0.00472   -0.00002
S3    5    0.316868    0.940330    0.065857    11.00000    0.01343    0.01249 =
         0.01480   -0.00024    0.00419   -0.00037
CL1   6    0.126601    0.786767    0.092917    11.00000    0.02310    0.01786 =
         0.01956    0.00080    0.01421    0.00189
S1    5    0.092860    0.760631   -0.123829    11.00000    0.01612    0.01987 =
         0.01202    0.00006    0.00460   -0.00084
CL2   6    0.663083    0.775722    0.115068    11.00000    0.02502    0.01672 =
         0.02785    0.00185    0.01499   -0.00052
S2    5    0.290169    0.567680    0.085083    11.00000    0.01473    0.01238 =
         0.02419   -0.00062    0.00295    0.00069
N1    3    0.313465    0.728739   -0.052770    11.00000    0.01689    0.01759 =
         0.02611   -0.00693    0.01159   -0.00176
C5    1    0.362473    0.844093   -0.057797    11.00000    0.02063    0.01923 =
         0.02382   -0.00068    0.01410   -0.00367
AFIX  23
H5A   2    0.315593    0.897650   -0.100423    11.00000   -1.20000
H5B   2    0.411980    0.825173   -0.077463    11.00000   -1.20000
AFIX   0
C16   1    0.427850    0.834699    0.227134    11.00000    0.02312    0.01629 =
         0.01745    0.00205    0.00435    0.00413
AFIX 137
H16A  2    0.464595    0.846304    0.288296    11.00000   -1.50000
H16B  2    0.468980    0.801572    0.202638    11.00000   -1.50000
H16C  2    0.375574    0.778952    0.217271    11.00000   -1.50000
AFIX   0
C3    1    0.388276    0.634406   -0.007560    11.00000    0.02126    0.01847 =
         0.05302   -0.00275    0.02320    0.00205
AFIX  23
H3A   2    0.437692    0.670076    0.044527    11.00000   -1.20000
H3B   2    0.418818    0.610385   -0.044832    11.00000   -1.20000
AFIX   0
C7    1    0.020476    0.904381   -0.152578    11.00000    0.01832    0.02054 =
         0.02533    0.00796   -0.00274    0.00077
C2    1    0.163205    0.765359   -0.186405    11.00000    0.02864    0.05679 =
         0.01262   -0.00639    0.00995   -0.01028
AFIX  23
H2A   2    0.124993    0.734819   -0.244451    11.00000   -1.20000
H2B   2    0.181994    0.849057   -0.190787    11.00000   -1.20000
AFIX   0
C9    1   -0.056292    0.884713   -0.119381    11.00000    0.02286    0.02690 =
         0.03892    0.00338    0.00792    0.01003
AFIX 137
H9A   2   -0.093247    0.958486   -0.126995    11.00000   -1.50000
H9B   2   -0.025790    0.863920   -0.058985    11.00000   -1.50000
H9C   2   -0.098415    0.819286   -0.151156    11.00000   -1.50000
AFIX   0
C4    1    0.347931    0.521417    0.016874    11.00000    0.02582    0.01506 =
         0.06303   -0.00156    0.02868    0.00206
AFIX  23
H4A   2    0.399686    0.463955    0.047581    11.00000   -1.20000
H4B   2    0.301391    0.481527   -0.034873    11.00000   -1.20000
AFIX   0
C1    1    0.251923    0.687017   -0.141945    11.00000    0.02873    0.04565 =
         0.03076   -0.02149    0.02153   -0.01221
AFIX  23
H1A   2    0.232087    0.603096   -0.139957    11.00000   -1.20000
H1B   2    0.289598    0.688246   -0.175641    11.00000   -1.20000
AFIX   0
C10   1    0.083359    1.014654   -0.109848    11.00000    0.02619    0.01767 =
         0.05639    0.00714   -0.00176   -0.00037
AFIX 137
H10A  2    0.044672    1.087643   -0.126031    11.00000   -1.50000
H10B  2    0.134391    1.020817   -0.128464    11.00000   -1.50000
H10C  2    0.110749    1.005180   -0.048050    11.00000   -1.50000
AFIX   0
C8    1   -0.026568    0.914896   -0.251274    11.00000    0.02995    0.04879 =
         0.02915    0.01908   -0.00356   -0.00272
AFIX 137
H8A   2   -0.061246    0.840853   -0.275937    11.00000   -1.50000
H8B   2    0.022579    0.927543   -0.271570    11.00000   -1.50000
H8C   2   -0.070595    0.982899   -0.268329    11.00000   -1.50000
AFIX   0
C11   1    0.203491    0.441756    0.073480    11.00000    0.01878    0.01420 =
         0.02203    0.00077    0.00846   -0.00178
C15   1    0.387285    0.957139    0.184662    11.00000    0.01756    0.01346 =
         0.01511   -0.00246    0.00167   -0.00136
C18   1    0.315673    1.008448    0.216537    11.00000    0.02833    0.01616 =
         0.01705   -0.00298    0.00678    0.00260
AFIX 137
H18A  2    0.346833    1.017321    0.278380    11.00000   -1.50000
H18B  2    0.261794    0.953506    0.201015    11.00000   -1.50000
H18C  2    0.293135    1.086944    0.190361    11.00000   -1.50000
AFIX   0
C12   1    0.166378    0.466888    0.141793    11.00000    0.04999    0.02046 =
         0.03306    0.00459    0.02558    0.00282
AFIX 137
H12A  2    0.120756    0.404630    0.139064    11.00000   -1.50000
H12B  2    0.135322    0.545515    0.131283    11.00000   -1.50000
H12C  2    0.219623    0.466390    0.198166    11.00000   -1.50000
AFIX   0
C17   1    0.468109    1.048854    0.199777    11.00000    0.02489    0.02130 =
         0.02387   -0.00305    0.00145   -0.00917
AFIX 137
H17A  2    0.441554    1.121148    0.165939    11.00000   -1.50000
H17B  2    0.514903    1.012971    0.182853    11.00000   -1.50000
H17C  2    0.498795    1.070230    0.260063    11.00000   -1.50000
AFIX   0
C13   1    0.121449    0.442230   -0.016643    11.00000    0.02331    0.02821 =
         0.02687    0.00100    0.00613   -0.01051
AFIX 137
H13A  2    0.077637    0.376438   -0.021709    11.00000   -1.50000
H13B  2    0.147171    0.431702   -0.058754    11.00000   -1.50000
H13C  2    0.087567    0.518851   -0.026555    11.00000   -1.50000
AFIX   0
C14   1    0.259358    0.321590    0.092382    11.00000    0.02975    0.01365 =
         0.04509    0.00306    0.01668    0.00303
AFIX 137
H14A  2    0.312201    0.325248    0.148915    11.00000   -1.50000
H14B  2    0.284027    0.308392    0.049785    11.00000   -1.50000
H14C  2    0.217066    0.255377    0.090363    11.00000   -1.50000
AFIX   0
C6    1    0.408437    0.910941    0.027588    11.00000    0.01561    0.01701 =
         0.02388    0.00090    0.01005   -0.00225
AFIX  23
H6A   2    0.436135    0.987609    0.020144    11.00000   -1.20000
H6B   2    0.459825    0.861551    0.069481    11.00000   -1.20000
AFIX   0
O1    4    0.603976    0.773351    0.023142    11.00000    0.02324    0.03502 =
         0.02755   -0.00402    0.00612    0.00368
O2    4    0.605347    0.746992    0.159710    11.00000    0.03938    0.10712 =
         0.06495    0.06424    0.03794    0.04002
O4    4    0.739102    0.688810    0.138421    11.00000    0.02497    0.07625 =
         0.04019   -0.00610    0.00604    0.02683
O3    4    0.700830    0.894397    0.139355    11.00000    0.16210    0.02731 =
         0.03620    0.00045    0.00405   -0.04088
HKLF    4

REM  2133_0m in P2(1)/c
REM R1 =  0.0367 for    6098 Fo > 4sig(Fo)  and  0.0559 for all    7856 data
REM    271 parameters refined using      0 restraints

END

WGHT      0.0239      2.4218

REM Highest difference peak  0.767,  deepest hole -0.578,  1-sigma level  0.086
Q1    1   0.6103  0.6977  0.1275  11.00000  0.05    0.77
Q2    1   0.6605  0.8879  0.1380  11.00000  0.05    0.68
Q3    1   0.7304  0.8595  0.1313  11.00000  0.05    0.51
Q4    1   0.7591  0.7269  0.1106  11.00000  0.05    0.45
Q5    1   0.3236  0.5605  0.0652  11.00000  0.05    0.44
Q6    1   0.0505  0.9522 -0.1137  11.00000  0.05    0.43
Q7    1   0.3464  0.9843  0.1937  11.00000  0.05    0.40
Q8    1   0.6423  0.7869  0.0681  11.00000  0.05    0.39
Q9    1   0.3620  0.9413  0.1302  11.00000  0.05    0.38
Q10   1   0.3706  0.6550 -0.0515  11.00000  0.05    0.38
Q11   1   0.7518  0.7288  0.1705  11.00000  0.05    0.36
Q12   1   0.2308  0.2371  0.1284  11.00000  0.05    0.35
Q13   1   0.0708  0.9436 -0.1368  11.00000  0.05    0.35
Q14   1   0.3757  0.5790  0.0003  11.00000  0.05    0.35
Q15   1   0.4624  0.7104  0.2906  11.00000  0.05    0.34
Q16   1   0.4004  0.8704 -0.0117  11.00000  0.05    0.34
Q17   1   0.2201  0.4678  0.1544  11.00000  0.05    0.34
Q18   1   0.2807  0.7552 -0.0305  11.00000  0.05    0.33
Q19   1   0.2674  0.8665  0.0304  11.00000  0.05    0.33
Q20   1   0.2308  0.3801  0.0733  11.00000  0.05    0.32
;
_shelx_res_checksum              42600

_shelx_hkl_file                  
;
   2   0   0  425.80   10.59
   2   0   0  438.44   11.29
  -2   0   0  452.23   11.30
  -2   0   0  438.58   10.57
  -2   0   0  460.57   10.60
  -2   0   0  417.38   11.02
   2   0   0  438.45   11.29
  -2   0   0  443.73   11.33
   2   0   0  425.54   10.84
  -2   0   0  443.74   11.33
  -2   0   0  452.25   11.30
  -3   0   0  176.70    5.07
  -3   0   0  179.18    5.13
   3   0   0  175.85    5.08
   3   0   0  180.96    4.51
  -3   0   0  176.71    5.07
  -3   0   0  179.30    4.48
   3   0   0  180.97    4.57
   3   0   0  170.24    4.47
  -3   0   0  179.19    5.13
  -3   0   0  179.69    4.52
  -3   0   0  174.75    4.55
   3   0   0  175.84    5.08
  -4   0   0   61.62    1.97
   4   0   0   65.33    2.46
  -4   0   0   66.75    2.50
  -4   0   0   66.36    2.44
  -4   0   0   61.49    1.93
   4   0   0   65.49    1.86
   4   0   0   64.54    2.01
   4   0   0   65.33    2.46
  -4   0   0   64.11    1.85
  -4   0   0   66.75    2.50
   4   0   0   64.86    1.94
  -4   0   0   66.36    2.44
  -5   0   0   47.44    2.11
   5   0   0   42.18    1.41
  -5   0   0   41.24    1.40
  -5   0   0   43.59    1.57
  -5   0   0   47.44    2.12
   5   0   0   44.25    2.06
   5   0   0   44.25    2.06
  -5   0   0   44.89    2.02
  -5   0   0   42.40    1.52
   5   0   0   42.52    1.59
  -5   0   0   44.89    2.02
   5   0   0   44.72    1.53
  -6   0   0   17.12    1.28
  -6   0   0   16.22    0.87
   6   0   0   16.28    0.86
   6   0   0   17.99    0.96
  -6   0   0   16.95    1.24
   6   0   0   10.42    1.27
  -6   0   0   14.90    0.75
  -6   0   0   14.17    0.86
   6   0   0   10.42    1.27
   6   0   0   18.24    1.32
   6   0   0   16.17    0.77
   6   0   0   18.24    1.32
  -6   0   0   17.12    1.28
  -6   0   0   16.95    1.24
   7   0   0    1.83    0.55
   7   0   0    2.28    0.37
  -7   0   0    2.63    0.37
  -7   0   0    2.95    0.48
   7   0   0    1.83    0.55
   7   0   0    2.80    0.51
   7   0   0    2.69    0.62
  -7   0   0    2.27    0.63
  -7   0   0    2.27    0.63
   7   0   0    2.69    0.62
  -8   0   0   -0.35    0.19
   8   0   0    0.22    0.27
  -8   0   0   -0.10    0.23
   8   0   0   -0.09    0.26
   8   0   0    0.09    0.27
   8   0   0    0.09    0.27
  -8   0   0   -0.13    0.17
  -8   0   0   -0.35    0.19
   8   0   0   -0.13    0.19
   8   0   0    0.22    0.27
   9   0   0   56.15    2.08
   9   0   0   63.32    3.18
   9   0   0   63.29    3.18
  -9   0   0   61.90    3.13
   9   0   0   58.12    3.12
  -9   0   0   59.78    2.05
  -9   0   0   60.21    2.28
   9   0   0   60.86    2.41
  -9   0   0   61.91    3.14
   9   0   0   58.12    3.12
 -10   0   0   47.59    2.80
  10   0   0   46.91    2.82
  10   0   0   47.77    2.86
  10   0   0   47.29    2.13
 -10   0   0   47.59    2.80
 -10   0   0   46.63    2.00
 -10   0   0   44.01    1.73
  10   0   0   47.77    2.86
  10   0   0   46.85    2.82
  10   0   0   42.34    1.78
  11   0   0   48.58    2.27
 -11   0   0   45.22    2.10
  11   0   0   45.80    1.93
  11   0   0   46.20    2.98
  11   0   0   53.31    3.15
  11   0   0   53.31    3.15
 -11   0   0   50.07    3.00
 -11   0   0   50.07    3.00
  11   0   0   46.45    2.99
  12   0   0    3.56    0.74
 -12   0   0    2.13    0.58
  12   0   0    3.73    0.66
  12   0   0    3.60    1.00
  13   0   0   12.57    1.16
  13   0   0    9.44    1.21
 -13   0   0   12.61    1.31
  14   0   0    0.20    0.49
 -14   0   0    0.37    0.52
  14   0   0    0.00    0.37
  15   0   0    0.22    0.45
  15   0   0    0.59    0.58
 -15   0   0    0.41    0.57
  16   0   0   14.18    1.67
  16   0   0   13.91    1.39
 -16   0   0   12.58    1.51
 -17   0   0    3.07    0.93
  17   0   0    2.32    0.74
  17   0   0    2.34    0.89
  18   0   0    2.27    0.80
  19   0   0    0.10    0.58
   0  -1   0   -0.28    0.08
   0  -1   0   -0.34    0.07
   0  -1   0   -0.33    0.06
   0  -1   0   -0.36    0.07
   0  -1   0   -0.36    0.07
   0   1   0   -0.18    0.12
   0   1   0   -0.18    0.12
   0   1   0   -0.28    0.07
   0   1   0   -0.32    0.06
   0   1   0   -0.12    0.07
  -1  -1   0  209.39    4.88
   1  -1   0  194.06    4.92
  -1  -1   0  200.83    5.30
  -1  -1   0  203.09    4.88
  -1  -1   0  200.84    5.29
   1  -1   0  198.57    4.96
  -1  -1   0  198.16    4.89
  -1   1   0  200.41    4.94
   1   1   0  192.14    4.89
   1   1   0  202.25    5.30
   1   1   0  202.25    5.30
  -1   1   0  196.93    5.44
  -1   1   0  195.78    4.94
   1   1   0  208.81    4.89
  -1   1   0  196.55    4.96
  -1   1   0  196.92    5.44
  -2  -1   0  186.23    4.57
  -2  -1   0  180.34    5.00
  -2  -1   0  180.73    5.00
  -2  -1   0  180.34    5.00
   2  -1   0  190.67    5.26
  -2  -1   0  180.73    5.00
   2  -1   0  185.36    4.63
   2  -1   0  190.68    5.27
   2  -1   0  178.92    4.60
   2  -1   0  179.08    4.68
  -2  -1   0  183.12    4.55
   2   1   0  180.73    4.55
  -2   1   0  182.85    4.62
   2   1   0  188.81    5.03
   2   1   0  181.07    4.55
   2   1   0  183.98    4.57
  -2   1   0  181.02    5.23
  -2   1   0  181.02    5.23
  -2   1   0  179.52    4.63
  -2   1   0  189.55    4.69
   2   1   0  188.79    5.03
   3  -1   0    0.07    0.15
  -3  -1   0   -0.06    0.23
   3  -1   0    0.04    0.20
  -3  -1   0   -0.03    0.16
   3  -1   0   -0.17    0.23
   3  -1   0   -0.28    0.14
  -3  -1   0    0.11    0.22
   3  -1   0   -0.17    0.23
  -3  -1   0   -0.06    0.23
  -3  -1   0    0.00    0.14
  -3  -1   0    0.11    0.22
  -3   1   0    0.20    0.25
   3   1   0   -0.15    0.14
   3   1   0   -0.05    0.08
   3   1   0    0.00    0.12
  -3   1   0    0.18    0.29
   3   1   0   -0.22    0.11
   3   1   0   -0.01    0.19
  -3   1   0    0.21    0.24
   3   1   0   -0.18    0.12
   3   1   0   -0.01    0.19
  -3   1   0   -0.27    0.13
  -3   1   0   -0.23    0.18
  -3   1   0   -0.06    0.17
  -3   1   0    0.18    0.29
   3   1   0   -0.22    0.11
   4  -1   0   37.04    1.82
   4  -1   0   35.10    1.36
  -4  -1   0   37.45    1.27
   4  -1   0   37.04    1.82
  -4  -1   0   34.87    1.62
   4  -1   0   36.05    1.29
  -4  -1   0   33.48    1.56
  -4  -1   0   37.51    1.23
  -4  -1   0   34.87    1.62
  -4  -1   0   33.48    1.56
   4  -1   0   33.61    1.17
  -4   1   0   34.36    1.69
  -4   1   0   35.26    1.78
   4   1   0   34.44    1.13
  -4   1   0   34.35    1.69
  -4   1   0   36.88    1.36
  -4   1   0   34.93    1.30
  -4   1   0   35.26    1.78
   4   1   0   32.81    1.60
   4   1   0   35.41    1.21
  -4   1   0   36.83    1.21
   4   1   0   33.61    1.24
   4   1   0   32.81    1.60
   5  -1   0    2.10    0.41
  -5  -1   0    2.06    0.50
   5  -1   0    1.55    0.48
  -5  -1   0    2.58    0.54
   5  -1   0    1.55    0.48
  -5  -1   0    2.58    0.54
  -5  -1   0    2.51    0.39
  -5  -1   0    1.81    0.32
   5  -1   0    1.93    0.35
  -5  -1   0    2.06    0.50
   5  -1   0    1.61    0.28
  -5   1   0    2.67    0.60
  -5   1   0    2.07    0.32
  -5   1   0    2.97    0.62
   5   1   0    2.18    0.30
  -5   1   0    2.42    0.42
  -5   1   0    2.42    0.39
  -5   1   0    2.97    0.62
  -5   1   0    2.67    0.60
   5   1   0    2.06    0.34
   5   1   0    2.53    0.53
   5   1   0    2.53    0.53
   5   1   0    1.55    0.33
   6  -1   0    6.82    0.72
  -6  -1   0    5.54    0.82
   6  -1   0    6.10    0.55
  -6  -1   0    7.22    0.57
  -6  -1   0    5.54    0.82
   6  -1   0    8.42    1.13
   6  -1   0    5.95    0.62
  -6  -1   0    7.53    0.98
  -6  -1   0    7.53    0.98
  -6  -1   0    6.29    0.63
   6  -1   0    8.42    1.13
   6   1   0    6.84    0.67
  -6   1   0    6.51    0.57
   6   1   0    6.84    0.51
  -6   1   0    6.31    0.67
  -6   1   0    6.99    1.02
  -6   1   0    7.28    1.00
  -6   1   0    7.28    1.00
  -6   1   0    6.99    1.02
   6   1   0    7.27    0.95
   6   1   0    6.86    0.62
   6   1   0    7.27    0.95
  -6   1   0    6.44    0.65
  -7  -1   0   14.34    1.22
  -7  -1   0   14.34    1.22
  -7  -1   0   15.07    0.93
  -7  -1   0   15.87    0.90
   7  -1   0   15.51    1.01
   7  -1   0   11.54    1.44
   7  -1   0   11.54    1.44
   7  -1   0   16.24    0.87
   7   1   0   14.55    0.77
   7   1   0   16.48    1.33
   7   1   0   18.81    1.03
  -7   1   0   15.39    0.82
   7   1   0   16.48    1.33
  -7   1   0   16.96    1.43
  -7   1   0   16.96    1.43
  -7   1   0   16.55    0.97
   7   1   0   14.83    0.86
  -8  -1   0   43.30    2.37
  -8  -1   0   43.30    2.37
   8  -1   0   43.72    1.66
  -8  -1   0   44.30    1.75
   8  -1   0   42.56    1.91
   8  -1   0   44.95    2.61
   8  -1   0   44.95    2.61
  -8   1   0   42.21    2.51
   8   1   0   47.47    2.49
   8   1   0   47.48    2.49
  -8   1   0   42.21    2.51
   8   1   0   44.63    1.85
  -8   1   0   44.28    1.84
   8   1   0   45.46    1.64
  -8   1   0   45.48    1.67
  -9  -1   0   12.08    0.89
   9  -1   0   11.72    1.61
  -9  -1   0   13.32    1.54
  -9  -1   0   13.32    1.54
   9  -1   0   13.22    1.03
   9  -1   0   15.47    0.93
   9  -1   0   11.72    1.61
   9   1   0   12.29    1.52
  -9   1   0   13.12    0.97
  -9   1   0   11.85    1.55
  -9   1   0   11.85    1.55
  -9   1   0   13.18    0.86
   9   1   0   14.65    0.85
   9   1   0   12.29    1.52
   9   1   0   12.39    0.95
  10  -1   0   40.74    2.71
  10  -1   0   40.74    2.71
 -10  -1   0   43.40    2.57
 -10  -1   0   43.40    2.57
  10  -1   0   40.84    2.00
  10  -1   0   40.10    1.71
 -10  -1   0   39.81    1.80
 -10   1   0   40.05    1.89
  10   1   0   38.94    2.54
 -10   1   0   44.70    2.77
  10   1   0   40.21    1.66
  10   1   0   38.94    2.54
  10   1   0   41.43    1.92
 -10   1   0   41.68    1.67
 -10   1   0   44.70    2.77
  11  -1   0   41.25    2.09
  11  -1   0   38.73    1.74
 -11  -1   0   36.75    2.50
  11  -1   0   44.86    2.93
  11  -1   0   44.86    2.93
 -11  -1   0   36.75    2.50
 -11  -1   0   39.62    1.86
  11   1   0   40.92    1.99
  11   1   0   39.45    1.72
 -11   1   0   39.18    2.70
  11   1   0   41.64    2.74
  11   1   0   41.63    2.74
 -11   1   0   39.17    2.70
 -11   1   0   38.57    1.93
  12  -1   0    7.71    1.06
  12  -1   0    9.30    0.97
 -12  -1   0   11.61    1.16
  12   1   0    9.18    1.54
 -12   1   0   10.17    1.14
  12   1   0    9.16    1.54
  12   1   0   11.26    1.23
  12   1   0   10.18    1.00
  13  -1   0   20.74    1.58
 -13  -1   0   18.29    1.34
  13  -1   0   19.47    1.30
  13   1   0   18.12    1.20
  13   1   0   16.42    2.17
  13   1   0   18.24    1.42
 -13   1   0   21.89    1.52
  13   1   0   16.43    2.16
  14  -1   0   39.67    2.28
  14  -1   0   36.39    1.91
 -14  -1   0   38.53    2.07
 -14   1   0   39.13    2.16
  14   1   0   36.58    1.87
  14   1   0   39.46    3.04
  14   1   0   40.34    2.22
  15  -1   0   10.63    1.44
  15  -1   0   12.62    1.30
 -15  -1   0    9.96    1.26
  15   1   0   12.01    1.19
  15   1   0    8.65    1.21
 -15   1   0    9.25    1.30
  16  -1   0    6.59    1.22
 -16  -1   0    5.38    1.05
  16  -1   0    4.83    0.90
  16   1   0    5.13    1.04
 -16   1   0    5.15    1.08
  16   1   0    7.41    1.03
  17  -1   0   -0.60    0.44
  17  -1   0    0.28    0.64
 -17   1   0   -0.03    0.68
  17   1   0    0.02    0.61
  17   1   0   -0.03    0.44
  18  -1   0    2.40    1.00
  18  -1   0    1.53    0.72
 -18   1   0    2.04    0.96
  18   1   0    2.17    0.74
  19  -1   0    1.03    0.78
  19   1   0    0.78    0.65
   0  -2   0  214.86    5.88
   0  -2   0  200.76    5.17
   0  -2   0  214.86    5.88
   0  -2   0  203.12    5.20
   0  -2   0  204.43    5.23
   0   2   0  205.87    5.19
   0   2   0  205.93    5.21
   0   2   0  206.11    5.24
   0   2   0  204.77    5.86
   0   2   0  204.77    5.85
  -1  -2   0    6.94    0.44
  -1  -2   0    7.18    0.71
   1  -2   0    6.34    0.47
  -1  -2   0    7.18    0.71
   1  -2   0    6.04    0.40
   1  -2   0    6.27    0.44
  -1  -2   0    6.19    0.42
   1  -2   0    6.95    0.78
  -1  -2   0    6.51    0.36
   1  -2   0    6.95    0.78
  -1   2   0    6.87    0.49
   1   2   0    6.72    0.43
  -1   2   0    6.18    0.73
  -1   2   0    6.80    0.46
   1   2   0    6.53    0.69
  -1   2   0    6.65    0.42
  -1   2   0    6.18    0.73
   1   2   0    6.78    0.44
   1   2   0    6.53    0.69
   1   2   0    6.00    0.38
  -2  -2   0   76.46    2.62
  -2  -2   0   80.04    2.20
   2  -2   0   73.59    2.18
   2  -2   0   78.95    2.87
   2  -2   0   78.95    2.87
   2  -2   0   83.92    2.31
  -2  -2   0   80.29    2.11
  -2  -2   0   76.46    2.61
  -2  -2   0   79.58    2.20
  -2   2   0   77.15    2.30
   2   2   0   76.35    2.64
  -2   2   0   80.85    2.91
  -2   2   0   82.22    2.36
   2   2   0   77.05    2.13
   2   2   0   78.87    2.20
   2   2   0   80.33    2.21
  -2   2   0   80.85    2.91
   2   2   0   76.35    2.63
  -2   2   0   80.77    2.23
  -3  -2   0   60.71    1.79
  -3  -2   0   61.56    2.24
  -3  -2   0   61.56    2.23
   3  -2   0   59.30    2.50
   3  -2   0   61.21    1.92
  -3  -2   0   58.97    1.80
   3  -2   0   57.60    1.79
   3  -2   0   61.98    2.00
   3  -2   0   59.30    2.50
   3   2   0   58.50    1.79
  -3   2   0   59.35    1.92
  -3   2   0   60.21    1.98
   3   2   0   59.31    2.25
   3   2   0   59.87    1.71
  -3   2   0   63.22    2.57
   3   2   0   59.31    2.24
  -3   2   0   58.51    1.82
  -3   2   0   63.22    2.57
   3   2   0   62.81    1.83
   4  -2   0   11.66    0.72
   4  -2   0   12.10    1.25
  -4  -2   0   11.59    0.87
  -4  -2   0   11.31    0.88
  -4  -2   0   12.46    0.65
  -4  -2   0   11.31    0.88
   4  -2   0   10.81    0.76
   4  -2   0   11.47    0.65
  -4  -2   0   12.72    0.68
   4  -2   0   12.10    1.25
  -4  -2   0   11.59    0.87
  -4   2   0   12.18    1.30
   4   2   0   12.91    0.69
  -4   2   0   12.18    1.30
  -4   2   0   11.06    0.76
  -4   2   0   11.45    0.73
   4   2   0   12.61    0.66
   4   2   0   14.34    0.98
   4   2   0    9.21    0.50
   4   2   0   14.34    0.98
   4   2   0   12.52    0.59
  -4   2   0   12.28    0.67
  -5  -2   0   47.46    2.08
   5  -2   0   48.87    2.45
  -5  -2   0   47.46    2.08
  -5  -2   0   45.85    2.08
  -5  -2   0   45.85    2.08
   5  -2   0   48.15    1.62
   5  -2   0   48.85    1.86
   5  -2   0   48.87    2.45
  -5  -2   0   47.48    1.65
  -5  -2   0   48.80    1.62
   5  -2   0   49.13    1.76
   5   2   0   47.66    1.51
  -5   2   0   47.53    2.41
  -5   2   0   45.03    1.75
  -5   2   0   46.36    1.81
  -5   2   0   47.54    1.62
  -5   2   0   47.53    2.41
   5   2   0   50.50    1.65
   5   2   0   45.56    2.12
  -5   2   0   45.33    2.27
   5   2   0   49.29    1.68
   5   2   0   45.56    2.13
  -5   2   0   45.35    2.27
  -6  -2   0   87.72    3.37
   6  -2   0   87.39    2.67
   6  -2   0   91.66    2.98
  -6  -2   0   90.12    2.72
   6  -2   0   92.82    3.80
  -6  -2   0   87.73    3.36
   6  -2   0   92.82    3.80
  -6  -2   0   86.88    2.66
   6   2   0   82.69    3.37
   6   2   0   90.19    2.76
   6   2   0   82.69    3.37
   6   2   0   82.91    2.54
  -6   2   0   86.42    3.60
  -6   2   0   86.43    3.60
  -6   2   0   89.82    2.87
  -6   2   0   91.43    3.78
  -6   2   0   86.28    2.67
  -6   2   0   91.43    3.78
   7  -2   0   48.39    2.78
   7  -2   0   56.90    1.96
   7  -2   0   55.80    2.24
  -7  -2   0   59.92    2.68
   7  -2   0   48.39    2.78
  -7  -2   0   55.59    1.96
  -7  -2   0   58.55    2.04
  -7  -2   0   59.91    2.68
   7   2   0   56.35    2.05
   7   2   0   57.40    2.69
   7   2   0   57.40    2.69
  -7   2   0   50.38    2.83
  -7   2   0   58.53    1.97
  -7   2   0   50.39    2.83
  -7   2   0   57.85    2.16
   7   2   0   57.36    1.85
   8  -2   0   59.03    3.14
   8  -2   0   55.35    2.31
  -8  -2   0   55.37    2.02
  -8  -2   0   57.81    2.76
  -8  -2   0   57.81    2.76
   8  -2   0   59.03    3.14
   8  -2   0   54.56    1.99
  -8   2   0   56.05    3.05
  -8   2   0   53.13    1.96
   8   2   0   52.83    2.74
  -8   2   0   56.05    3.05
   8   2   0   52.25    1.87
   8   2   0   53.42    2.09
   8   2   0   52.82    2.74
  -8   2   0   55.04    2.20
  -9  -2   0   66.71    2.39
   9  -2   0   66.52    2.69
   9  -2   0   70.20    3.64
  -9  -2   0   61.69    3.09
   9  -2   0   68.97    2.38
  -9  -2   0   61.69    3.09
   9  -2   0   70.20    3.64
  -9   2   0   68.97    2.34
   9   2   0   61.72    3.15
   9   2   0   65.10    2.48
   9   2   0   61.72    3.15
   9   2   0   67.11    2.24
  -9   2   0   63.05    2.53
  -9   2   0   65.89    3.49
  -9   2   0   65.89    3.50
  10  -2   0    0.70    0.34
  10  -2   0    0.83    0.44
 -10  -2   0    0.39    0.26
 -10  -2   0    0.44    0.36
  10  -2   0    0.39    0.38
  10  -2   0    0.82    0.44
 -10  -2   0    0.39    0.26
 -10   2   0    0.64    0.33
  10   2   0    0.11    0.31
  10   2   0    0.01    0.16
  10   2   0    0.01    0.16
 -10   2   0    1.53    0.59
 -10   2   0    1.53    0.59
  10   2   0    0.83    0.33
  10   2   0    0.11    0.31
  10   2   0    1.19    0.44
 -10   2   0    0.36    0.35
  11  -2   0   10.99    1.72
 -11  -2   0   11.73    1.11
  11  -2   0    9.33    1.14
  11  -2   0   11.62    1.06
  11  -2   0   10.99    1.72
 -11  -2   0   10.02    1.46
 -11  -2   0   10.02    1.46
  11   2   0   12.37    1.68
  11   2   0   12.37    1.68
  11   2   0   12.03    0.89
 -11   2   0    8.97    1.09
  11   2   0   10.37    1.11
 -11   2   0   10.20    1.64
 -11   2   0   10.20    1.64
 -12  -2   0    0.36    0.41
  12  -2   0    0.41    0.45
  12  -2   0    1.30    0.49
  12   2   0    0.66    0.36
  12   2   0    0.77    0.56
  12   2   0    1.85    0.55
  12   2   0    0.77    0.56
 -12   2   0    0.54    0.46
  13  -2   0   -0.04    0.39
 -13  -2   0    0.34    0.41
  13  -2   0    0.40    0.47
  13   2   0    0.67    0.57
  13   2   0    0.67    0.57
 -13   2   0    0.24    0.46
  13   2   0    0.38    0.41
  13   2   0    0.24    0.34
  14  -2   0    3.13    0.83
  14  -2   0    2.90    0.70
 -14  -2   0    4.14    0.82
  14   2   0    0.66    0.60
  14   2   0    3.39    0.78
 -14   2   0    2.98    0.86
  14   2   0    2.89    0.64
  14   2   0    0.65    0.60
 -15  -2   0   -0.46    0.44
  15  -2   0    1.01    0.55
  15  -2   0    1.07    0.61
  15   2   0   -0.45    0.31
  15   2   0   -0.02    0.45
  15   2   0    0.14    0.48
  15   2   0    0.01    0.45
 -15   2   0    0.91    0.64
  16  -2   0   15.09    1.50
  16  -2   0   15.05    1.77
 -16  -2   0   11.95    1.43
  16   2   0   14.88    1.63
 -16   2   0   15.25    1.71
  16   2   0   12.98    2.14
  16   2   0   15.45    1.28
  17  -2   0    0.00    0.59
  17  -2   0    0.61    0.60
  17   2   0    1.43    0.61
 -17   2   0    1.49    0.81
  18  -2   0    8.23    1.25
  18  -2   0    5.43    1.28
  18   2   0    9.34    1.21
 -18   2   0    8.96    1.49
  19  -2   0   -0.95    0.56
  19   2   0   -0.75    0.44
   0  -3   0   -0.42    0.27
   0  -3   0   -0.44    0.17
   0  -3   0   -0.42    0.27
   0  -3   0   -0.49    0.14
   0  -3   0   -0.16    0.23
   0   3   0   -0.51    0.26
   0   3   0   -0.51    0.26
   0   3   0   -0.30    0.17
   0   3   0   -0.48    0.18
   0   3   0   -0.48    0.19
  -1  -3   0   24.17    1.04
   1  -3   0   27.06    1.54
   1  -3   0   27.06    1.54
   1  -3   0   27.38    1.10
   1  -3   0   27.86    1.15
  -1  -3   0   25.66    1.42
  -1  -3   0   25.27    0.91
   1  -3   0   27.05    0.99
  -1  -3   0   26.93    1.05
  -1  -3   0   25.66    1.42
  -1   3   0   27.31    1.02
   1   3   0   27.51    1.08
  -1   3   0   25.11    1.53
   1   3   0   27.62    1.47
   1   3   0   25.26    0.96
  -1   3   0   28.31    1.16
   1   3   0   27.62    1.47
  -1   3   0   25.11    1.53
   1   3   0   26.17    1.06
  -1   3   0   28.42    1.12
   2  -3   0  981.85   23.07
  -2  -3   0  975.74   24.54
   2  -3   0  953.71   24.86
   2  -3   0  953.71   24.88
   2  -3   0  959.52   23.15
  -2  -3   0  934.79   23.47
   2  -3   0  963.25   23.79
  -2  -3   0 1000.00   22.95
  -2  -3   0  954.44   22.95
  -2  -3   0  975.68   24.52
  -2   3   0  975.64   23.09
  -2   3   0  994.20   23.16
   2   3   0  920.44   23.74
   2   3   0  999.56   22.97
   2   3   0  919.81   24.53
  -2   3   0  930.65   23.88
  -2   3   0  908.71   24.84
   2   3   0  919.80   24.54
   2   3   0  951.64   23.76
  -2   3   0  908.70   24.83
   3  -3   0    0.35    0.26
   3  -3   0    0.38    0.35
   3  -3   0    0.17    0.21
   3  -3   0    0.25    0.22
  -3  -3   0    0.25    0.26
  -3  -3   0    0.25    0.26
   3  -3   0    0.38    0.35
  -3  -3   0    0.32    0.22
  -3  -3   0    0.43    0.22
   3   3   0    0.38    0.19
   3   3   0    0.76    0.36
  -3   3   0    0.80    0.43
  -3   3   0    0.57    0.24
   3   3   0    0.51    0.22
   3   3   0    0.46    0.23
   3   3   0    0.76    0.36
  -3   3   0    0.71    0.30
  -3   3   0    0.71    0.27
  -3   3   0    0.80    0.43
   4  -3   0   65.53    2.17
  -4  -3   0   64.36    2.02
   4  -3   0   60.58    2.88
   4  -3   0   59.16    1.98
  -4  -3   0   67.05    2.59
  -4  -3   0   67.05    2.59
   4  -3   0   60.26    2.23
  -4  -3   0   62.55    1.99
   4  -3   0   60.58    2.88
  -4   3   0   64.25    2.25
   4   3   0   62.81    1.89
  -4   3   0   63.26    2.96
   4   3   0   63.41    2.01
   4   3   0   60.54    2.01
   4   3   0   64.33    2.60
  -4   3   0   63.26    2.96
  -4   3   0   62.60    2.18
   4   3   0   64.33    2.60
  -4   3   0   61.12    2.02
  -5  -3   0   36.85    1.42
  -5  -3   0   35.77    1.85
  -5  -3   0   35.77    1.85
   5  -3   0   37.44    1.67
   5  -3   0   39.40    1.46
   5  -3   0   40.32    2.30
  -5  -3   0   40.13    1.44
   5  -3   0   40.32    2.30
   5   3   0   38.36    1.43
  -5   3   0   37.06    1.45
   5   3   0   38.84    1.97
  -5   3   0   36.02    1.58
   5   3   0   37.91    1.32
   5   3   0   38.83    1.97
  -5   3   0   36.98    2.26
  -5   3   0   36.98    2.26
   5   3   0   38.18    1.46
   6  -3   0    1.14    0.43
   6  -3   0    1.12    0.47
  -6  -3   0    1.38    0.42
  -6  -3   0    1.31    0.33
  -6  -3   0    1.38    0.42
   6  -3   0    1.57    0.36
   6  -3   0    1.12    0.47
  -6  -3   0    1.92    0.37
   6   3   0    0.83    0.21
  -6   3   0    0.16    0.35
  -6   3   0    1.13    0.33
   6   3   0    1.07    0.27
   6   3   0    1.48    0.35
   6   3   0    1.26    0.29
   6   3   0    1.14    0.42
   6   3   0    1.14    0.42
  -6   3   0    1.12    0.37
  -6   3   0    0.16    0.35
   7  -3   0    8.86    1.32
  -7  -3   0   12.89    0.84
  -7  -3   0   13.94    1.43
   7  -3   0    8.86    1.33
   7  -3   0   13.13    1.03
   7  -3   0   12.06    0.82
  -7  -3   0   13.19    0.81
  -7  -3   0   13.95    1.43
   7   3   0   12.87    0.81
   7   3   0   13.02    0.74
   7   3   0   12.35    0.85
   7   3   0   12.23    1.38
   7   3   0   12.23    1.38
  -7   3   0   11.09    0.90
  -7   3   0   12.47    0.88
  -7   3   0   13.76    1.73
  -7   3   0   13.76    1.73
   8  -3   0  116.94    3.97
  -8  -3   0  121.17    4.50
   8  -3   0  111.73    3.56
  -8  -3   0  121.16    4.50
  -8  -3   0  110.84    3.50
   8  -3   0  120.57    5.09
   8  -3   0  120.56    5.09
  -8   3   0  115.89    3.83
   8   3   0  117.12    3.42
  -8   3   0  121.62    5.11
   8   3   0  113.61    4.56
   8   3   0  113.61    4.56
   8   3   0  113.08    3.62
  -8   3   0  121.62    5.11
  -8   3   0  112.05    3.56
  -9  -3   0    1.06    0.40
   9  -3   0    2.76    0.53
   9  -3   0    1.97    0.57
  -9  -3   0    1.06    0.40
   9  -3   0    1.70    0.63
  -9  -3   0    2.36    0.48
   9  -3   0    1.70    0.63
   9   3   0    2.49    0.53
  -9   3   0    1.53    0.49
  -9   3   0    2.03    0.49
   9   3   0    2.82    0.76
   9   3   0    1.45    0.36
  -9   3   0    1.30    0.58
  -9   3   0    1.30    0.58
   9   3   0    2.82    0.76
 -10  -3   0   17.27    1.88
 -10  -3   0   17.27    1.88
 -10  -3   0   18.49    1.15
  10  -3   0   15.66    1.10
  10  -3   0   18.01    1.36
  10  -3   0   18.64    2.31
  10  -3   0   18.64    2.31
  10   3   0   15.93    1.83
  10   3   0   17.67    1.17
  10   3   0   15.93    1.83
 -10   3   0   13.90    1.93
 -10   3   0   19.17    1.16
  10   3   0   16.68    1.01
 -10   3   0   13.90    1.93
 -10   3   0   15.00    1.21
  11  -3   0    5.13    0.75
 -11  -3   0    5.58    0.78
  11  -3   0    4.72    0.89
  11   3   0    5.52    0.83
 -11   3   0    7.59    1.50
 -11   3   0    7.59    1.50
  11   3   0    6.34    0.74
 -11   3   0    7.30    1.00
  11   3   0    6.83    1.25
  11   3   0    6.83    1.25
  12  -3   0   -0.44    0.34
  12  -3   0    0.06    0.35
 -12  -3   0    0.07    0.38
  12   3   0   -0.10    0.33
  12   3   0   -0.10    0.33
  12   3   0    0.24    0.38
 -12   3   0   -0.29    0.38
  12   3   0    0.72    0.38
  13  -3   0   16.10    1.27
  13  -3   0   14.90    1.62
 -13  -3   0   16.65    1.27
  13   3   0   16.14    2.10
 -13   3   0   19.31    1.51
  13   3   0   17.07    1.16
  13   3   0   16.14    2.10
  13   3   0   16.11    1.31
 -14  -3   0    4.94    0.88
  14  -3   0    6.05    0.96
  14  -3   0    5.41    1.10
  14   3   0    3.37    1.02
  14   3   0    3.37    1.02
  14   3   0    5.87    0.99
 -14   3   0    4.34    0.96
  14   3   0    5.31    0.81
  15  -3   0    9.42    1.21
  15  -3   0    7.45    1.26
 -15  -3   0    9.45    1.21
  15   3   0    9.08    1.06
  15   3   0   10.13    1.30
  15   3   0    6.79    1.46
 -15   3   0    8.91    1.31
  15   3   0    6.79    1.46
  16  -3   0    1.70    0.73
  16  -3   0    1.59    0.81
  16   3   0    1.19    0.55
  16   3   0    1.26    0.72
 -16   3   0    0.61    0.68
  16   3   0    1.36    0.72
  17  -3   0    3.17    0.92
  17  -3   0    2.55    0.95
  17   3   0    0.36    0.68
  17   3   0    0.40    0.68
 -17   3   0    2.78    1.02
  17   3   0    2.33    0.67
  18  -3   0    5.70    1.13
  18  -3   0    4.81    1.23
  18   3   0    6.24    1.02
 -18   3   0    3.69    1.13
  19  -3   0    1.36    0.87
  19   3   0    0.58    0.56
   0  -4   0  457.98   12.73
   0  -4   0  456.90   11.35
   0  -4   0  470.10   11.41
   0  -4   0  458.00   12.73
   0  -4   0  437.20   11.43
   0   4   0  453.80   11.39
   0   4   0  458.73   12.79
   0   4   0  437.08   11.39
   0   4   0  470.16   11.48
   0   4   0  458.73   12.78
   1  -4   0    7.04    0.69
  -1  -4   0    7.23    0.67
   1  -4   0    6.86    0.97
   1  -4   0    6.86    0.97
  -1  -4   0    8.04    0.69
  -1  -4   0    7.16    0.48
   1  -4   0    7.67    0.54
   1  -4   0    7.68    0.69
  -1  -4   0    7.55    1.00
  -1  -4   0    7.55    1.00
   1   4   0    8.65    0.66
   1   4   0    6.85    0.95
  -1   4   0    8.39    0.76
  -1   4   0    7.43    1.02
   1   4   0    7.71    0.60
   1   4   0    6.85    0.95
  -1   4   0    7.01    0.57
  -1   4   0    7.43    1.02
  -1   4   0    6.78    0.66
   1   4   0    7.67    0.54
   2  -4   0  107.92    3.45
  -2  -4   0  118.60    3.31
  -2  -4   0  114.78    4.07
  -2  -4   0  114.78    4.08
   2  -4   0  114.79    3.40
   2  -4   0  106.85    3.20
  -2  -4   0  108.34    3.10
  -2  -4   0  115.95    3.33
   2  -4   0  115.10    4.34
   2  -4   0  115.09    4.34
  -2   4   0  116.16    3.50
   2   4   0  114.85    4.13
   2   4   0  114.85    4.13
  -2   4   0  113.77    3.28
   2   4   0  116.23    3.20
  -2   4   0  116.69    4.40
   2   4   0  116.21    3.33
  -2   4   0  107.81    3.39
   2   4   0  115.35    3.34
  -2   4   0  116.68    4.41
  -3  -4   0   28.78    1.68
  -3  -4   0   28.77    1.68
  -3  -4   0   30.86    1.11
  -3  -4   0   34.03    1.32
   3  -4   0   33.60    1.28
   3  -4   0   30.82    1.97
   3  -4   0   30.82    1.98
   3  -4   0   30.15    1.46
  -3  -4   0   33.16    1.32
  -3   4   0   34.46    2.11
   3   4   0   31.82    1.82
   3   4   0   32.09    1.31
  -3   4   0   34.46    2.11
   3   4   0   31.82    1.82
   3   4   0   29.49    1.28
  -3   4   0   32.48    1.31
  -3   4   0   30.82    1.42
   3   4   0   33.09    1.20
  -4  -4   0   47.59    1.69
   4  -4   0   43.26    2.50
   4  -4   0   43.26    2.50
   4  -4   0   46.03    1.68
  -4  -4   0   47.63    1.70
   4  -4   0   51.81    2.02
   4   4   0   48.14    1.73
  -4   4   0   46.30    1.86
  -4   4   0   44.63    2.59
   4   4   0   46.23    1.69
   4   4   0   45.41    1.56
  -4   4   0   44.63    2.59
   4   4   0   44.16    2.25
   4   4   0   44.16    2.25
  -4   4   0   45.85    1.71
   5  -4   0    1.31    0.56
   5  -4   0    2.04    0.41
   5  -4   0    1.31    0.56
  -5  -4   0    1.70    0.35
   5  -4   0    2.52    0.54
  -5  -4   0    2.49    0.40
  -5   4   0    1.91    0.46
  -5   4   0    1.49    0.61
   5   4   0    1.66    0.31
   5   4   0    1.41    0.48
  -5   4   0    1.49    0.61
   5   4   0    1.41    0.48
   5   4   0    2.05    0.38
   5   4   0    2.50    0.43
  -5   4   0    1.26    0.35
  -6  -4   0    1.25    0.43
  -6  -4   0    1.31    0.34
   6  -4   0    1.11    0.42
   6  -4   0    1.65    0.64
  -6  -4   0    1.25    0.43
  -6  -4   0    1.98    0.39
   6  -4   0    1.65    0.64
   6  -4   0    0.99    0.34
   6   4   0    1.94    0.37
  -6   4   0    1.19    0.55
   6   4   0    0.83    0.26
  -6   4   0    1.19    0.55
  -6   4   0    1.07    0.42
   6   4   0    1.14    0.34
  -6   4   0    1.89    0.42
   6   4   0    1.67    0.52
   6   4   0    1.67    0.52
   7  -4   0   81.28    2.70
  -7  -4   0   81.61    3.37
  -7  -4   0   81.60    3.36
   7  -4   0   77.39    3.03
   7  -4   0   81.64    4.04
  -7  -4   0   76.15    2.61
   7  -4   0   81.65    4.04
  -7   4   0   79.70    2.95
  -7   4   0   81.02    2.72
  -7   4   0   77.21    3.98
   7   4   0   82.19    3.56
   7   4   0   82.19    3.55
   7   4   0   75.25    2.67
   7   4   0   81.00    2.52
  -7   4   0   77.21    3.98
   8  -4   0    0.33    0.38
   8  -4   0    0.81    0.49
  -8  -4   0    0.04    0.23
   8  -4   0    0.80    0.36
  -8  -4   0    0.04    0.23
  -8  -4   0    1.08    0.37
   8  -4   0    0.81    0.49
  -8   4   0    0.33    0.37
  -8   4   0    0.33    0.37
  -8   4   0    0.44    0.37
   8   4   0    0.09    0.27
   8   4   0    0.09    0.27
  -8   4   0    0.40    0.34
   8   4   0    0.45    0.25
   8   4   0    1.01    0.36
  -9  -4   0   90.44    3.94
   9  -4   0   95.67    4.72
  -9  -4   0   93.39    3.09
   9  -4   0   90.59    3.56
   9  -4   0   95.56    3.20
  -9  -4   0   90.45    3.94
   9  -4   0   95.67    4.72
  -9   4   0   86.23    4.58
  -9   4   0   95.16    3.17
   9   4   0   98.05    3.24
  -9   4   0   96.47    3.50
   9   4   0   91.03    4.14
   9   4   0   92.26    2.95
  -9   4   0   86.23    4.58
   9   4   0   91.03    4.14
  10  -4   0   13.07    1.18
 -10  -4   0   10.68    1.45
 -10  -4   0   11.85    0.93
  10  -4   0   13.59    2.07
  10  -4   0    8.60    1.17
  10  -4   0   13.59    2.07
 -10  -4   0   10.68    1.45
 -10   4   0   13.30    1.34
  10   4   0   10.50    1.04
 -10   4   0   10.33    1.81
 -10   4   0   11.32    1.07
  10   4   0   12.39    0.87
  10   4   0   11.11    1.55
 -10   4   0   10.33    1.80
  10   4   0   11.11    1.55
  11  -4   0   13.13    1.45
  11  -4   0   15.84    1.18
 -11  -4   0   14.81    1.09
 -11   4   0   15.62    1.50
  11   4   0   15.87    1.03
 -11   4   0   14.60    2.15
  11   4   0   13.49    1.79
  11   4   0   13.49    1.79
 -11   4   0   14.60    2.15
  11   4   0   13.55    1.11
 -12  -4   0    0.44    0.43
  12  -4   0    0.85    0.55
  12  -4   0    0.22    0.43
  12   4   0    0.47    0.45
  12   4   0    1.09    0.48
  12   4   0    0.17    0.32
  12   4   0    0.47    0.45
 -12   4   0   -0.20    0.41
  13  -4   0    9.00    1.30
 -13  -4   0    9.33    1.10
  13  -4   0    9.64    1.13
  13   4   0   10.85    1.22
  13   4   0   11.42    1.76
  13   4   0    9.17    0.97
  13   4   0   11.42    1.76
 -13   4   0    7.54    1.16
  14  -4   0    0.34    0.54
 -14  -4   0    0.52    0.52
  14  -4   0    0.54    0.61
  14   4   0   -0.09    0.43
  14   4   0    0.70    0.56
  14   4   0    0.70    0.57
  14   4   0    0.54    0.41
 -14   4   0    0.17    0.56
  15  -4   0    0.17    0.58
 -15  -4   0   -0.38    0.47
  15  -4   0   -0.46    0.47
  15   4   0    0.44    0.51
  15   4   0   -0.42    0.41
  15   4   0    0.44    0.51
 -15   4   0    0.31    0.63
  15   4   0   -0.13    0.38
  16  -4   0   16.62    1.99
  16  -4   0   17.46    1.68
  16   4   0   11.15    1.93
 -16   4   0   18.19    2.00
  16   4   0   11.15    1.93
  16   4   0   17.42    1.33
  17  -4   0    2.50    0.88
  17  -4   0    3.22    1.06
 -17   4   0    0.70    0.84
  17   4   0    0.38    0.64
  17   4   0    1.96    0.65
  17   4   0    0.47    0.64
  18  -4   0    5.90    1.17
  18  -4   0    5.42    1.34
 -18   4   0    5.41    1.29
  18   4   0    6.13    1.01
  19  -4   0   -0.13    0.64
  19  -4   0   -1.08    0.61
  19   4   0   -0.43    0.50
 -19   4   0   -0.52    0.73
   0  -5   0    0.05    0.21
   0  -5   0    0.13    0.31
   0  -5   0    0.13    0.31
   0  -5   0    0.16    0.26
   0   5   0   -0.18    0.22
   0   5   0   -0.18    0.22
   0   5   0    0.16    0.22
   0   5   0    0.18    0.25
   1  -5   0  122.03    4.72
  -1  -5   0  124.58    3.72
   1  -5   0  120.07    3.49
   1  -5   0  122.03    4.72
  -1  -5   0  122.15    3.44
   1  -5   0  125.09    3.82
  -1   5   0  124.14    3.75
   1   5   0  126.73    3.54
  -1   5   0  125.22    3.58
   1   5   0  113.98    4.56
   1   5   0  113.97    4.56
  -1   5   0  124.43    4.81
  -1   5   0  124.44    4.81
   1   5   0  122.97    3.68
   2  -5   0   35.54    2.29
  -2  -5   0   39.15    1.40
   2  -5   0   35.54    2.29
  -2  -5   0   39.01    1.63
   2  -5   0   41.63    1.80
   2  -5   0   39.91    1.51
   2   5   0   41.82    1.50
   2   5   0   42.94    2.33
  -2   5   0   41.74    2.48
   2   5   0   42.09    1.65
  -2   5   0   39.12    1.71
  -2   5   0   39.71    1.56
   2   5   0   42.94    2.33
   2   5   0   42.32    1.68
  -2   5   0   41.74    2.48
  -3  -5   0   93.90    2.97
   3  -5   0   91.92    4.08
  -3  -5   0   89.97    2.69
   3  -5   0   97.75    2.91
   3  -5   0   94.60    3.22
   3  -5   0   91.92    4.08
   3   5   0   95.39    3.88
   3   5   0   92.98    2.96
  -3   5   0   96.34    2.96
  -3   5   0   94.18    3.13
   3   5   0   95.39    3.87
   3   5   0   91.52    2.80
  -3   5   0   91.97    4.16
  -3   5   0   91.97    4.16
   4  -5   0   46.16    2.71
   4  -5   0   46.17    2.71
   4  -5   0   45.05    1.71
   4  -5   0   44.67    1.98
  -4  -5   0   40.83    1.70
  -4   5   0   48.82    2.85
  -4   5   0   48.82    2.86
   4   5   0   44.06    1.60
   4   5   0   42.20    2.37
   4   5   0   43.08    1.74
   4   5   0   42.20    2.37
  -4   5   0   45.82    1.93
  -4   5   0   42.56    1.73
   5  -5   0   21.65    1.36
   5  -5   0   21.14    1.13
   5  -5   0   21.11    2.25
  -5  -5   0   20.09    1.09
   5  -5   0   21.11    2.25
   5   5   0   23.83    1.05
  -5   5   0   23.82    2.45
  -5   5   0   23.82    2.45
   5   5   0   20.48    1.12
   5   5   0   22.18    1.66
  -5   5   0   19.99    1.26
   5   5   0   22.18    1.65
  -5   5   0   19.49    1.14
   6  -5   0    8.19    1.41
   6  -5   0    8.19    1.41
   6  -5   0    9.10    1.04
   6  -5   0    9.61    0.88
  -6  -5   0    8.17    0.79
  -6   5   0    7.54    0.92
   6   5   0    6.85    1.09
  -6   5   0   11.22    1.72
  -6   5   0   11.22    1.72
  -6   5   0    8.26    0.83
   6   5   0    6.85    1.09
   6   5   0    9.20    0.87
   6   5   0    7.87    0.62
  -7  -5   0    1.59    0.50
  -7  -5   0    2.76    0.50
   7  -5   0    2.21    0.50
   7  -5   0    0.84    0.55
   7  -5   0    2.40    0.61
  -7  -5   0    1.59    0.50
   7  -5   0    0.84    0.55
  -7   5   0    2.56    0.89
  -7   5   0    2.56    0.89
   7   5   0    2.22    0.40
  -7   5   0    1.16    0.44
  -7   5   0    1.72    0.52
   7   5   0    1.62    0.58
   7   5   0    1.62    0.58
   7   5   0    1.68    0.42
  -8  -5   0   11.41    0.89
   8  -5   0   13.52    1.41
  -8  -5   0   13.89    1.58
   8  -5   0   14.87    2.11
   8  -5   0   14.87    2.11
  -8  -5   0   13.89    1.58
   8  -5   0   11.66    1.07
   8   5   0   12.21    0.94
  -8   5   0   13.67    1.33
  -8   5   0   11.98    1.86
  -8   5   0   11.03    1.05
  -8   5   0   11.97    1.86
   8   5   0   11.59    1.51
   8   5   0   12.35    0.84
   8   5   0   11.59    1.51
   9  -5   0   29.00    1.86
   9  -5   0   29.27    1.56
  -9  -5   0   30.35    2.03
  -9  -5   0   30.35    2.03
  -9  -5   0   28.01    1.46
   9  -5   0   24.76    2.79
   9  -5   0   24.76    2.79
   9   5   0   29.75    1.55
  -9   5   0   29.75    3.10
  -9   5   0   29.75    3.10
   9   5   0   32.69    2.27
   9   5   0   32.69    2.27
  -9   5   0   32.59    1.85
  -9   5   0   27.79    1.56
   9   5   0   30.30    1.39
  10  -5   0   11.51    1.37
 -10  -5   0   13.08    1.02
  10  -5   0   12.59    1.19
 -10   5   0   12.32    2.01
  10   5   0   16.70    1.95
 -10   5   0   14.17    1.15
  10   5   0   13.95    1.08
 -10   5   0   12.32    2.01
  10   5   0   12.37    0.91
 -10   5   0   12.26    1.34
  10   5   0   16.70    1.95
 -11  -5   0   16.62    1.19
  11  -5   0   18.28    1.32
  11  -5   0   16.94    1.74
 -11   5   0   20.74    1.57
  11   5   0   17.12    2.07
 -11   5   0   14.64    2.23
  11   5   0   17.93    1.12
 -11   5   0   14.64    2.23
  11   5   0   17.12    2.07
  11   5   0   16.48    1.23
 -12  -5   0   13.94    1.28
  12  -5   0    9.89    1.41
  12  -5   0   15.18    1.43
  12   5   0   13.70    1.04
  12   5   0   12.69    1.84
  12   5   0   14.73    1.37
  12   5   0   12.69    1.84
 -12   5   0   12.79    1.51
  13  -5   0    7.43    1.07
 -13  -5   0    8.36    1.06
  13  -5   0    5.05    1.08
  13   5   0    7.38    0.90
 -13   5   0    4.79    1.02
  13   5   0    9.43    1.66
  13   5   0    9.43    1.66
  13   5   0    6.10    0.96
 -14  -5   0   23.69    1.62
  14  -5   0   21.92    2.20
  14  -5   0   27.62    1.78
  14   5   0   26.33    1.52
  14   5   0   19.99    2.46
 -14   5   0   22.37    2.13
  14   5   0   19.99    2.46
  14   5   0   22.25    1.63
  15  -5   0    4.44    1.10
  15  -5   0    5.37    1.05
  15   5   0    4.31    1.16
  15   5   0    4.31    1.16
 -15   5   0    6.19    1.24
  15   5   0    5.03    0.83
  16  -5   0    0.81    0.78
  16  -5   0    0.93    0.68
  16   5   0   -0.11    0.49
  16   5   0    1.81    0.59
  16   5   0   -0.11    0.49
 -16   5   0    1.01    0.79
  17  -5   0    2.76    0.92
  17  -5   0    2.10    0.95
  17   5   0    2.81    0.75
 -17   5   0    1.86    0.99
  18  -5   0    1.80    0.91
  18  -5   0    1.50    0.88
  18   5   0    2.19    0.74
 -18   5   0    1.54    0.96
   0  -6   0  289.24    7.95
   0  -6   0  292.88    7.66
   0   6   0  288.69    9.43
   0   6   0  301.71    7.78
   0   6   0  288.71    9.43
   0   6   0  288.91    7.91
   1  -6   0    9.31    0.97
   1  -6   0   11.88    0.79
  -1  -6   0   10.48    0.71
  -1  -6   0   11.52    0.89
  -1   6   0   10.36    1.52
   1   6   0   10.43    1.44
   1   6   0   10.28    0.84
  -1   6   0   11.11    0.80
  -1   6   0    8.10    0.88
   1   6   0   11.93    0.82
  -1   6   0   10.36    1.52
   1   6   0   10.43    1.44
   2  -6   0   42.79    1.68
  -2  -6   0   45.80    1.60
  -2  -6   0   41.12    1.82
   2  -6   0   43.03    1.98
  -2   6   0   46.49    2.82
  -2   6   0   43.63    1.75
  -2   6   0   46.50    2.82
   2   6   0   43.47    1.68
   2   6   0   45.95    1.87
   2   6   0   41.06    2.51
   2   6   0   41.06    2.51
  -2   6   0   44.81    1.94
   3  -6   0    2.42    0.57
   3  -6   0    2.06    0.43
  -3  -6   0    2.53    0.38
  -3  -6   0    2.63    0.52
   3   6   0    3.80    0.91
  -3   6   0    3.16    0.54
   3   6   0    3.80    0.91
  -3   6   0    2.86    0.56
  -3   6   0    2.61    0.84
   3   6   0    3.05    0.53
  -3   6   0    2.61    0.84
   3   6   0    2.87    0.46
   4  -6   0    1.80    0.52
  -4  -6   0    1.74    0.32
   4  -6   0    1.63    0.41
  -4  -6   0    2.17    0.47
  -4   6   0    1.79    0.76
   4   6   0    1.91    0.39
   4   6   0    1.99    0.65
   4   6   0    1.99    0.65
  -4   6   0    1.41    0.42
   4   6   0    2.38    0.48
  -4   6   0    1.23    0.44
  -4   6   0    1.79    0.76
  -5  -6   0    0.58    0.31
   5  -6   0    0.20    0.28
   5  -6   0    0.09    0.32
  -5   6   0    0.43    0.47
   5   6   0    0.40    0.37
  -5   6   0   -0.20    0.26
   5   6   0    0.00    0.22
  -5   6   0    0.43    0.47
   5   6   0    0.40    0.37
   5   6   0   -0.14    0.18
  -5   6   0    0.20    0.29
   6  -6   0   -0.03    0.31
  -6  -6   0    0.33    0.30
   6  -6   0    0.20    0.33
   6   6   0    0.26    0.24
   6   6   0    0.50    0.33
  -6   6   0    0.02    0.29
   6   6   0    0.40    0.36
  -6   6   0    0.29    0.34
   6   6   0    0.40    0.36
  -6   6   0    0.45    0.53
  -6   6   0    0.45    0.53
   7  -6   0    8.89    0.96
   7  -6   0    6.44    0.99
   7   6   0    9.00    0.93
  -7   6   0    8.73    1.09
  -7   6   0    8.95    1.66
   7   6   0    7.95    0.77
  -7   6   0    6.86    0.84
   7   6   0    5.65    1.10
   7   6   0    5.65    1.10
  -7   6   0    8.94    1.65
  -8  -6   0    7.27    0.84
  -8  -6   0    8.14    1.26
   8  -6   0    7.62    0.92
   8  -6   0    6.31    1.03
  -8  -6   0    8.14    1.26
   8   6   0    6.68    0.84
   8   6   0    7.16    1.23
  -8   6   0    4.52    1.25
  -8   6   0    4.52    1.25
   8   6   0    7.16    1.23
  -8   6   0    6.97    0.90
   8   6   0    7.82    0.79
  -8   6   0    7.59    1.06
  -9  -6   0   35.98    1.69
   9  -6   0   31.39    2.02
   9  -6   0   32.24    1.73
   9   6   0   31.86    2.38
   9   6   0   33.12    1.70
   9   6   0   31.28    1.51
  -9   6   0   36.04    3.03
  -9   6   0   36.04    3.03
  -9   6   0   30.33    1.72
   9   6   0   31.86    2.38
  -9   6   0   33.77    1.98
 -10  -6   0   46.69    2.07
  10  -6   0   48.29    2.63
  10  -6   0   50.37    2.26
  10   6   0   43.77    2.92
  10   6   0   48.98    1.98
  10   6   0   46.12    2.15
 -10   6   0   45.53    3.52
 -10   6   0   49.17    2.51
  10   6   0   43.76    2.92
 -10   6   0   45.52    3.52
 -10   6   0   47.94    2.24
  11  -6   0   25.50    1.66
  11  -6   0   21.99    1.84
 -11  -6   0   28.51    1.58
 -11   6   0   29.90    3.46
  11   6   0   29.49    2.38
  11   6   0   29.50    2.39
  11   6   0   28.74    1.65
  11   6   0   27.72    1.47
 -11   6   0   29.00    1.95
 -11   6   0   29.90    3.46
 -12  -6   0    8.20    1.03
  12  -6   0    8.60    1.34
  12  -6   0    8.70    1.14
 -12   6   0    7.57    1.21
  12   6   0    6.68    1.38
  12   6   0    6.68    1.38
  12   6   0    8.55    0.95
  12   6   0    8.76    1.07
  13  -6   0    8.45    1.37
  13  -6   0    7.95    1.15
 -13  -6   0   12.60    1.28
  13   6   0    9.01    1.60
 -13   6   0   13.06    1.62
  13   6   0   10.46    1.09
  13   6   0    9.01    1.60
  13   6   0   12.72    1.33
  14  -6   0    0.93    0.70
  14  -6   0    1.40    0.72
 -14   6   0    0.37    0.65
  14   6   0    1.09    0.59
  14   6   0    1.41    0.51
  14   6   0    1.09    0.59
  15  -6   0    1.50    0.78
  15  -6   0    1.12    0.80
  15   6   0    1.10    0.66
  15   6   0    1.10    0.66
 -15   6   0    1.30    0.82
  15   6   0    0.79    0.53
  16  -6   0   27.79    2.66
  16  -6   0   28.61    2.11
 -16   6   0   26.72    2.56
  16   6   0   23.92    2.91
  16   6   0   27.15    1.69
  16   6   0   23.93    2.92
  17  -6   0    0.15    0.70
  17  -6   0   -0.22    0.75
 -17   6   0   -0.28    0.66
  17   6   0   -0.25    0.48
  18  -6   0    5.10    1.21
  18   6   0    4.15    0.88
   0  -7   0   -0.06    0.21
   0  -7   0    0.16    0.29
   0   7   0   -0.05    0.24
   0   7   0    0.00    0.28
   0   7   0    0.33    0.37
   0   7   0    0.33    0.37
  -1  -7   0   20.17    1.06
   1  -7   0   21.15    1.12
  -1  -7   0   21.21    1.32
   1  -7   0   20.20    1.35
  -1   7   0   15.83    2.00
  -1   7   0   21.64    1.34
   1   7   0   22.66    1.32
   1   7   0   18.83    1.11
  -1   7   0   22.76    1.21
  -1   7   0   15.83    2.00
   1   7   0   23.36    2.35
   1   7   0   23.36    2.35
  -2  -7   0  102.17    3.17
  -2  -7   0  108.19    3.58
   2  -7   0  104.26    3.72
   2  -7   0  104.69    3.31
  -2   7   0  105.35    3.66
   2   7   0  103.83    3.31
   2   7   0  102.30    4.65
   2   7   0  108.77    3.57
  -2   7   0  102.01    4.88
  -2   7   0  106.97    3.42
   2   7   0  102.30    4.65
  -2   7   0  102.01    4.89
   3  -7   0   10.68    0.86
  -3  -7   0   13.75    0.80
   3  -7   0   10.08    1.13
  -3  -7   0   12.36    0.99
  -3   7   0   11.10    1.13
  -3   7   0   10.29    1.70
   3   7   0   11.95    0.86
   3   7   0   12.46    0.98
   3   7   0    9.68    1.48
  -3   7   0   13.28    0.98
  -3   7   0   10.29    1.70
   3   7   0    9.68    1.48
  -4  -7   0   26.97    1.19
  -4  -7   0   26.78    1.46
   4  -7   0   28.97    1.43
   4  -7   0   28.68    1.72
   4   7   0   26.21    2.10
  -4   7   0   24.96    1.57
   4   7   0   27.70    1.32
  -4   7   0   28.69    1.48
  -4   7   0   29.24    2.44
  -4   7   0   29.24    2.44
   4   7   0   26.21    2.11
   4   7   0   26.00    1.44
  -5  -7   0   23.08    1.38
   5  -7   0   27.94    1.45
   5  -7   0   24.34    1.65
  -5   7   0   22.22    2.60
   5   7   0   25.82    1.44
   5   7   0   29.49    2.21
  -5   7   0   22.22    2.60
   5   7   0   26.71    1.31
  -5   7   0   25.49    1.60
  -5   7   0   27.15    1.48
   5   7   0   29.49    2.21
   6  -7   0    5.00    0.90
  -6  -7   0    5.01    0.74
   6  -7   0    4.92    0.73
  -6   7   0    3.39    1.09
   6   7   0    5.11    0.66
  -6   7   0    4.60    0.73
  -6   7   0    4.03    0.78
   6   7   0    4.59    0.73
  -6   7   0    3.39    1.09
   6   7   0    5.05    1.10
   6   7   0    5.05    1.10
   7  -7   0   12.57    1.41
   7  -7   0   14.10    1.11
  -7  -7   0   15.34    1.09
   7   7   0   15.10    1.11
  -7   7   0   14.18    2.18
  -7   7   0   14.18    2.18
  -7   7   0   11.30    1.29
   7   7   0   14.56    1.83
   7   7   0   13.31    0.95
  -7   7   0   13.91    1.27
   7   7   0   14.56    1.83
   8  -7   0   30.33    1.99
   8  -7   0   30.86    1.68
  -8   7   0   29.52    3.29
  -8   7   0   29.53    3.29
   8   7   0   30.52    2.34
  -8   7   0   28.49    1.86
   8   7   0   30.06    1.47
  -8   7   0   29.76    1.71
   8   7   0   30.52    2.34
   8   7   0   29.31    1.62
  -9  -7   0    2.85    0.65
   9  -7   0    2.57    0.80
   9  -7   0    1.52    0.58
  -9   7   0    3.29    1.18
   9   7   0    2.58    0.61
  -9   7   0    1.94    0.64
  -9   7   0    3.29    1.17
   9   7   0    1.75    0.69
   9   7   0    1.75    0.69
  -9   7   0    2.07    0.72
   9   7   0    1.72    0.48
 -10  -7   0    1.49    0.54
  10  -7   0    0.50    0.57
  10  -7   0    1.92    0.66
 -10   7   0    0.85    0.70
  10   7   0    1.11    0.58
  10   7   0    1.06    0.49
  10   7   0    1.06    0.44
 -10   7   0    0.85    0.70
 -10   7   0    1.78    0.68
 -10   7   0    1.54    0.62
  10   7   0    1.11    0.58
  11  -7   0    7.26    1.24
 -11  -7   0    6.53    0.93
  11  -7   0    8.04    1.15
  11   7   0    6.95    0.86
 -11   7   0    5.95    1.11
  11   7   0    6.62    1.35
  11   7   0    6.62    1.35
  11   7   0    7.00    0.99
  12  -7   0    0.28    0.58
 -12  -7   0    0.10    0.46
  12  -7   0   -0.23    0.50
  12   7   0    0.09    0.31
 -12   7   0    0.03    0.53
  12   7   0    0.35    0.43
  12   7   0   -0.13    0.34
  12   7   0    0.09    0.31
  13  -7   0    0.08    0.59
  13  -7   0    0.37    0.62
 -13   7   0   -0.29    0.55
  13   7   0    0.63    0.42
  13   7   0   -0.22    0.34
  13   7   0   -0.22    0.34
  14  -7   0    9.99    1.36
  14  -7   0    7.97    1.44
 -14   7   0    7.10    1.35
  14   7   0    8.17    1.01
  14   7   0    8.14    1.66
  14   7   0    8.14    1.66
  15  -7   0   17.61    2.17
  15  -7   0   15.81    1.76
  15   7   0   17.39    2.45
  15   7   0   17.39    2.45
  15   7   0   13.20    1.32
 -15   7   0   17.86    2.10
  16  -7   0   -0.34    0.74
  16  -7   0   -0.06    0.61
  16   7   0   -0.24    0.41
 -16   7   0   -0.23    0.65
  17  -7   0    2.01    0.99
 -17   7   0    4.65    1.33
  17   7   0    3.33    0.81
   0  -8   0    3.68    0.74
   0  -8   0    4.24    0.60
   0   8   0    1.74    0.76
   0   8   0    2.99    0.64
   0   8   0    4.15    0.64
   0   8   0    1.74    0.76
  -1  -8   0   11.95    0.85
  -1  -8   0   10.46    1.16
   1  -8   0    9.58    0.92
   1  -8   0   13.36    1.36
  -1   8   0   11.82    0.97
  -1   8   0   11.96    1.24
   1   8   0   10.29    1.66
   1   8   0   11.59    1.06
  -1   8   0   11.69    1.87
   1   8   0   13.53    1.28
  -1   8   0   11.69    1.87
   1   8   0   10.29    1.66
  -2  -8   0    1.93    0.55
  -2  -8   0    1.23    0.36
   2  -8   0    2.19    0.49
   2  -8   0    1.63    0.54
   2   8   0    1.73    0.45
   2   8   0    1.04    0.64
  -2   8   0    0.37    0.56
   2   8   0    0.97    0.43
  -2   8   0    0.37    0.56
  -2   8   0    1.86    0.50
   2   8   0    1.04    0.64
  -2   8   0    1.70    0.54
  -3  -8   0   10.58    0.78
  -3  -8   0    9.33    1.06
   3  -8   0   11.94    1.33
   3  -8   0   11.98    1.07
   3   8   0   10.14    1.09
   3   8   0   10.85    1.69
  -3   8   0   12.11    2.00
   3   8   0   10.53    0.88
   3   8   0   10.85    1.69
  -3   8   0    9.60    1.01
  -3   8   0   12.11    2.00
  -3   8   0   10.52    1.20
  -4  -8   0    1.47    0.49
   4  -8   0    0.91    0.52
   4  -8   0    2.06    0.51
  -4   8   0    1.52    0.54
  -4   8   0    1.69    0.73
   4   8   0    1.32    0.43
   4   8   0    1.98    0.80
   4   8   0    1.98    0.80
  -4   8   0    1.69    0.73
  -4   8   0    0.97    0.48
   4   8   0    1.54    0.50
   5  -8   0   31.40    1.63
  -5  -8   0   30.79    1.67
   5  -8   0   29.97    1.92
  -5   8   0   30.02    1.67
  -5   8   0   29.76    3.32
   5   8   0   27.54    2.31
  -5   8   0   31.22    1.87
   5   8   0   27.54    2.31
  -5   8   0   29.76    3.32
   5   8   0   30.08    1.51
   5   8   0   30.05    1.67
   6  -8   0   15.76    1.61
  -6  -8   0   12.90    1.22
   6  -8   0   13.88    1.13
   6   8   0   13.75    1.90
   6   8   0   13.75    1.90
  -6   8   0   14.19    2.31
  -6   8   0   14.19    2.31
  -6   8   0   14.81    1.22
   6   8   0   12.80    0.99
   6   8   0   11.97    1.21
  -6   8   0   11.30    1.33
  -7  -8   0   78.99    3.03
   7  -8   0   74.95    3.50
   7  -8   0   83.11    3.10
   7   8   0   84.42    3.16
   7   8   0   77.76    4.20
  -7   8   0   82.46    3.49
  -7   8   0   81.60    3.17
   7   8   0   77.76    4.20
   7   8   0   82.94    2.91
   8  -8   0    0.49    0.47
   8  -8   0   -0.04    0.41
   8   8   0    0.15    0.40
  -8   8   0    0.82    0.52
  -8   8   0   -0.43    0.45
   8   8   0    0.15    0.40
  -8   8   0    0.77    0.53
  -8   8   0   -0.43    0.45
   8   8   0    0.26    0.33
   8   8   0   -0.13    0.36
   9  -8   0   15.61    1.79
   9  -8   0   18.51    1.61
  -9  -8   0   16.39    1.29
   9   8   0   14.56    2.01
   9   8   0   16.72    1.28
  -9   8   0   10.79    2.07
  -9   8   0   16.83    1.76
   9   8   0   14.56    2.01
   9   8   0   14.54    1.07
  -9   8   0   10.79    2.07
  -9   8   0   16.52    1.55
  10  -8   0    0.60    0.57
 -10  -8   0   -0.06    0.41
  10  -8   0    0.43    0.50
  10   8   0    0.71    0.51
 -10   8   0   -0.07    0.55
  10   8   0    0.42    0.39
  10   8   0   -0.13    0.39
 -10   8   0    0.38    0.55
  10   8   0    0.71    0.51
 -10   8   0    0.43    0.55
 -10   8   0   -0.07    0.55
 -11  -8   0    0.11    0.46
  11  -8   0   -0.53    0.51
  11  -8   0    0.39    0.59
  11   8   0    0.08    0.35
 -11   8   0    0.36    0.57
  11   8   0    0.54    0.48
  11   8   0    0.54    0.48
  11   8   0    0.82    0.51
  12  -8   0    1.66    0.80
  12  -8   0    2.68    0.83
  12   8   0    2.95    0.92
 -12   8   0    4.20    1.07
  12   8   0    3.15    0.68
  12   8   0    2.95    0.92
  13  -8   0    3.61    0.97
  13  -8   0    4.97    1.23
  13   8   0    2.72    0.96
  13   8   0    2.72    0.96
  13   8   0    4.62    0.80
 -13   8   0    3.86    1.10
  14  -8   0    2.49    1.00
  14  -8   0    3.41    1.02
  14   8   0    3.38    0.73
 -14   8   0    3.11    1.07
  14   8   0    1.57    0.74
  14   8   0    1.57    0.74
  15  -8   0    4.16    1.21
  15  -8   0    1.66    0.86
 -15   8   0    1.63    0.87
  15   8   0    1.31    0.58
  16  -8   0   18.80    2.01
  16   8   0   13.79    1.41
 -16   8   0   15.45    2.00
   0  -9   0    0.10    0.43
   0  -9   0    0.25    0.32
   0   9   0    0.17    0.36
   0   9   0    0.72    0.57
   0   9   0   -0.25    0.28
   0   9   0    0.72    0.57
  -1  -9   0    8.53    1.12
   1  -9   0    5.69    0.95
  -1  -9   0    8.14    0.86
   1  -9   0    7.96    0.90
  -1   9   0    5.56    1.34
   1   9   0    7.68    1.58
   1   9   0    7.68    1.58
   1   9   0    7.25    0.88
  -1   9   0    6.51    0.86
  -1   9   0    6.75    0.97
   1   9   0    6.93    0.97
  -1   9   0    5.56    1.34
   2  -9   0    3.60    0.82
   2  -9   0    4.01    0.67
  -2  -9   0    3.55    0.74
  -2   9   0    2.81    1.00
  -2   9   0    4.71    0.77
  -2   9   0    2.54    0.69
   2   9   0    5.31    1.30
   2   9   0    3.45    0.64
   2   9   0    3.52    0.74
  -2   9   0    2.81    1.00
   2   9   0    5.31    1.30
   3  -9   0    1.71    0.65
  -3  -9   0    2.33    0.64
   3  -9   0    3.03    0.63
   3   9   0    3.09    0.61
  -3   9   0    2.92    0.74
   3   9   0    1.30    0.74
   3   9   0    1.77    0.58
   3   9   0    1.30    0.74
  -3   9   0    3.37    1.17
  -3   9   0    3.37    1.17
  -3   9   0    3.12    0.66
  -4  -9   0    5.88    0.93
   4  -9   0    7.60    1.16
   4  -9   0    5.86    0.87
  -4   9   0    7.48    1.11
  -4   9   0    6.50    1.49
   4   9   0    6.61    1.41
  -4   9   0    5.73    0.88
   4   9   0    5.86    0.79
  -4   9   0    6.50    1.49
   4   9   0    6.28    0.95
   4   9   0    6.61    1.41
   5  -9   0    5.24    0.82
  -5  -9   0    5.26    0.88
   5  -9   0    4.20    0.90
   5   9   0    4.92    1.21
  -5   9   0    4.03    0.85
  -5   9   0    3.40    0.73
   5   9   0    5.59    0.89
   5   9   0    4.92    1.21
   5   9   0    4.09    0.68
  -5   9   0    4.42    1.29
  -5   9   0    4.42    1.29
   6  -9   0   29.85    2.08
   6  -9   0   30.95    1.76
  -6  -9   0   32.52    1.83
   6   9   0   31.83    2.63
  -6   9   0   33.69    1.90
  -6   9   0   27.81    1.95
   6   9   0   36.93    1.93
   6   9   0   32.49    1.66
   6   9   0   31.83    2.62
   7  -9   0    5.71    0.91
   7  -9   0    6.17    1.13
  -7  -9   0    5.93    0.91
  -7   9   0    8.04    1.10
   7   9   0    7.60    1.52
   7   9   0    7.60    1.52
  -7   9   0    6.68    1.10
  -7   9   0    5.04    1.46
   7   9   0    7.64    1.03
   7   9   0    6.64    0.87
  -7   9   0    5.04    1.46
  -8  -9   0   31.53    1.87
   8  -9   0   37.43    2.03
   8  -9   0   36.44    2.40
  -8   9   0   39.10    4.24
  -8   9   0   39.09    4.23
  -8   9   0   34.82    2.28
   8   9   0   33.25    2.77
   8   9   0   33.25    2.77
   8   9   0   38.41    2.04
  -8   9   0   37.76    2.17
   8   9   0   37.14    1.84
  -9  -9   0    0.00    0.46
   9  -9   0   -0.29    0.48
   9  -9   0    0.09    0.43
  -9   9   0    0.77    0.77
  -9   9   0    0.23    0.48
   9   9   0   -0.28    0.35
  -9   9   0   -0.20    0.55
   9   9   0   -0.11    0.39
   9   9   0    0.43    0.41
  -9   9   0    0.77    0.77
   9   9   0   -0.11    0.39
 -10  -9   0    1.18    0.63
  10  -9   0    1.80    0.74
  10  -9   0    1.04    0.70
  10   9   0    0.65    0.44
 -10   9   0    1.99    0.80
  10   9   0    0.92    0.49
 -10   9   0    1.36    0.97
 -10   9   0    1.36    0.97
  10   9   0    0.92    0.49
  10   9   0    0.65    0.47
  11  -9   0   -0.05    0.53
 -11  -9   0   -0.24    0.48
  11  -9   0    0.16    0.61
  11   9   0    0.81    0.52
  11   9   0    0.81    0.52
  11   9   0    0.19    0.46
  11   9   0   -0.19    0.36
 -11   9   0    0.17    0.57
  12  -9   0   -0.08    0.59
  12  -9   0   -0.16    0.60
 -12   9   0    0.49    0.67
  12   9   0    0.22    0.47
  12   9   0    0.22    0.47
  12   9   0    0.24    0.43
  13  -9   0   -0.05    0.70
  13  -9   0    0.83    0.81
  13   9   0   -0.10    0.44
 -13   9   0    1.16    0.77
  13   9   0   -0.10    0.44
  13   9   0   -0.35    0.39
  14  -9   0    4.76    1.15
  14  -9   0    5.68    1.33
 -14   9   0    7.10    1.44
  14   9   0    4.19    0.83
  15  -9   0    1.67    0.92
  15  -9   0    2.22    0.98
 -15   9   0    1.79    0.94
  15   9   0    2.46    0.72
  16  -9   0   -0.23    0.81
  16   9   0    0.00    0.50
   0 -10   0   40.91    2.34
   0  10   0   44.39    3.41
   0  10   0   44.39    3.41
   0  10   0   46.35    2.18
   0  10   0   43.20    2.34
   1 -10   0    2.16    0.74
  -1 -10   0    3.43    0.78
   1  10   0    0.87    0.65
  -1  10   0    2.55    0.73
   1  10   0    1.24    0.55
  -1  10   0    4.54    1.37
   1  10   0    2.40    0.63
  -1  10   0    1.90    0.61
  -1  10   0    4.54    1.37
   1  10   0    0.87    0.65
   2 -10   0   21.21    1.67
  -2 -10   0   18.94    1.52
   2 -10   0   17.79    1.28
  -2  10   0   21.34    1.63
   2  10   0   19.84    1.53
   2  10   0   17.68    1.34
  -2  10   0   21.37    2.83
   2  10   0   25.40    2.98
  -2  10   0   21.37    2.82
   2  10   0   25.40    2.98
  -2  10   0   20.98    1.46
  -3 -10   0    1.36    0.63
   3 -10   0    0.69    0.57
   3 -10   0    1.18    0.52
   3  10   0   -0.11    0.40
  -3  10   0    1.42    0.61
  -3  10   0    0.10    0.49
   3  10   0   -0.11    0.40
  -3  10   0    0.10    0.49
   3  10   0    1.06    0.54
   3  10   0    0.76    0.44
  -3  10   0    0.44    0.46
   4 -10   0    0.97    0.49
   4 -10   0    1.89    0.70
  -4 -10   0    2.94    0.74
   4  10   0    0.86    0.44
   4  10   0    1.07    0.69
  -4  10   0   -0.14    0.44
  -4  10   0   -0.14    0.44
  -4  10   0    2.10    0.65
   4  10   0    1.07    0.69
  -4  10   0    1.10    0.59
   4  10   0    2.05    0.64
   5 -10   0    1.24    0.69
   5 -10   0    0.71    0.53
  -5 -10   0    0.80    0.53
   5  10   0    1.44    0.59
   5  10   0    0.79    0.46
   5  10   0    0.41    0.55
  -5  10   0    1.76    0.98
   5  10   0    0.41    0.55
  -5  10   0    0.82    0.56
  -5  10   0    1.76    0.98
  -5  10   0    0.45    0.51
   6 -10   0    1.34    0.62
   6 -10   0    0.54    0.60
  -6 -10   0    2.15    0.67
  -6  10   0    2.26    0.76
   6  10   0    1.45    0.75
   6  10   0    1.51    0.53
  -6  10   0    3.18    0.82
   6  10   0    0.56    0.47
   6  10   0    1.45    0.75
  -6  10   0    1.66    0.90
  -6  10   0    1.66    0.90
   7 -10   0   17.21    1.93
  -7 -10   0   16.44    1.55
   7 -10   0   17.68    1.46
   7  10   0   17.63    1.64
  -7  10   0   18.22    1.93
   7  10   0   15.59    2.37
  -7  10   0   16.79    2.75
   7  10   0   15.59    2.37
   7  10   0   15.04    1.23
  -7  10   0   20.53    1.67
  -7  10   0   16.79    2.74
   8 -10   0    3.83    0.99
   8 -10   0    3.95    0.89
  -8 -10   0    5.26    0.95
  -8  10   0    3.95    0.99
   8  10   0    4.62    1.21
  -8  10   0    3.38    1.37
   8  10   0    4.57    0.90
   8  10   0    5.09    0.81
  -8  10   0    3.38    1.37
  -8  10   0    6.04    1.11
   8  10   0    4.62    1.21
   9 -10   0    2.57    0.89
   9 -10   0    5.48    1.03
  -9  10   0    7.48    1.97
  -9  10   0    7.48    1.97
   9  10   0    7.93    1.67
   9  10   0    4.94    0.83
  -9  10   0    4.00    1.02
   9  10   0    7.93    1.67
   9  10   0    5.30    0.97
  -9  10   0    5.46    1.06
  10 -10   0   11.00    1.67
  10 -10   0   16.52    1.74
 -10 -10   0   13.30    1.44
 -10  10   0   11.82    1.68
  10  10   0   12.80    1.43
  10  10   0   12.24    1.27
  10  10   0   11.83    2.00
  10  10   0   11.83    2.00
  11 -10   0    0.77    0.76
  11 -10   0    0.22    0.64
  11  10   0    0.41    0.46
  11  10   0   -0.15    0.39
 -11  10   0    0.72    0.70
  11  10   0   -0.15    0.39
  12 -10   0    1.07    0.88
  12 -10   0    1.38    0.83
  12  10   0    2.28    0.90
 -12  10   0    3.99    1.14
  12  10   0    1.92    0.66
  12  10   0    2.28    0.90
  13 -10   0   10.18    1.74
  13 -10   0   12.84    1.68
 -13  10   0   14.14    1.94
  13  10   0   13.12    1.38
  14 -10   0    1.48    0.93
  14  10   0   -0.24    0.47
  15 -10   0    3.36    1.18
  15  10   0    3.82    0.86
   0 -11   0    0.09    0.47
   0  11   0    0.44    0.50
   0  11   0    0.20    0.57
   0  11   0    0.46    0.51
   0  11   0    0.20    0.57
   1 -11   0   49.89    2.74
  -1 -11   0   46.72    2.59
   1  11   0   46.42    3.69
   1  11   0   46.42    3.69
  -1  11   0   44.95    3.70
   1  11   0   53.22    2.70
  -1  11   0   45.99    2.59
   1  11   0   49.79    2.37
  -1  11   0   53.65    2.52
  -1  11   0   44.96    3.70
  -2 -11   0    3.47    0.88
   2 -11   0    3.34    0.92
   2  11   0    1.68    0.85
  -2  11   0    4.05    1.32
  -2  11   0    4.05    1.32
  -2  11   0    4.26    0.91
  -2  11   0    5.48    0.95
   2  11   0    1.68    0.85
   2  11   0    5.09    0.88
   2  11   0    4.67    0.93
   3 -11   0   10.97    1.52
  -3 -11   0   12.11    1.49
  -3  11   0    8.89    2.05
   3  11   0   12.64    1.27
  -3  11   0    8.89    2.05
  -3  11   0   10.73    1.47
  -3  11   0    8.81    1.20
   3  11   0   12.10    2.13
   3  11   0   12.10    2.13
   3  11   0   15.64    1.65
   4 -11   0   10.93    1.51
  -4 -11   0   10.41    1.38
  -4  11   0   10.62    1.31
  -4  11   0   13.46    2.46
  -4  11   0   13.46    2.46
   4  11   0    8.00    1.82
   4  11   0    8.00    1.82
  -4  11   0   11.87    1.49
   4  11   0   10.80    1.19
   4  11   0   12.40    1.43
   5 -11   0    5.80    1.18
  -5 -11   0    9.79    1.33
  -5  11   0    7.23    1.15
   5  11   0    5.83    1.51
   5  11   0    7.80    1.16
  -5  11   0    7.36    1.24
  -5  11   0    4.23    1.52
  -5  11   0    4.23    1.52
   5  11   0    7.37    1.02
   5  11   0    5.83    1.51
  -6 -11   0   -0.65    0.50
   6 -11   0   -0.45    0.48
  -6  11   0    0.36    0.53
   6  11   0    1.02    0.74
   6  11   0    0.40    0.49
  -6  11   0    0.09    0.57
  -6  11   0   -0.18    0.59
  -6  11   0   -0.18    0.59
   6  11   0    0.20    0.43
   6  11   0    1.02    0.74
  -7 -11   0    1.73    0.71
   7 -11   0    3.73    0.89
   7 -11   0    3.62    1.03
  -7  11   0    3.09    0.93
  -7  11   0    4.26    1.46
   7  11   0    3.21    0.73
   7  11   0    3.05    0.78
  -7  11   0    2.14    0.79
   7  11   0    0.89    0.71
   7  11   0    0.89    0.71
  -7  11   0    4.26    1.46
  -8 -11   0    5.76    1.07
   8 -11   0    4.66    1.19
   8 -11   0    5.46    1.05
   8  11   0    1.66    0.84
  -8  11   0    4.29    1.51
   8  11   0    1.66    0.84
  -8  11   0    4.29    1.51
  -8  11   0    8.43    1.42
   8  11   0    4.56    0.99
   8  11   0    4.66    0.87
  -8  11   0    5.95    1.15
   9 -11   0   25.01    1.92
   9 -11   0   19.59    2.29
   9  11   0   29.06    1.76
   9  11   0   25.15    3.10
   9  11   0   26.82    1.88
  -9  11   0   29.75    2.13
   9  11   0   25.15    3.11
  10 -11   0    0.61    0.74
  10 -11   0   -0.55    0.57
  10  11   0    0.59    0.70
  10  11   0    0.59    0.70
  10  11   0   -0.06    0.43
 -10  11   0    0.76    0.66
  11 -11   0    1.51    0.84
  11 -11   0   -0.41    0.53
  11  11   0    0.17    0.57
 -11  11   0    0.19    0.61
  11  11   0    0.17    0.57
  11  11   0    0.60    0.53
  12 -11   0    3.58    1.07
  12 -11   0    1.71    0.96
  12  11   0    3.85    0.84
 -12  11   0    2.16    0.96
  13 -11   0   -0.35    0.78
  13  11   0   -0.28    0.45
  14 -11   0   14.64    1.90
  14  11   0   14.13    1.50
   0 -12   0    3.24    0.94
   0  12   0    3.06    0.86
   0  12   0    2.41    1.11
   0  12   0    5.68    1.01
   0  12   0    2.41    1.11
   1 -12   0    0.16    0.62
  -1 -12   0    0.69    0.65
   1  12   0    0.42    0.54
   1  12   0    0.48    0.67
  -1  12   0    0.10    0.54
   1  12   0    0.40    0.55
  -1  12   0    0.66    0.66
  -1  12   0    0.16    0.50
   1  12   0    0.48    0.67
  -1  12   0    0.66    0.66
  -2 -12   0    3.49    0.97
   2 -12   0    5.37    1.16
   2  12   0    3.10    1.22
  -2  12   0    3.65    1.30
  -2  12   0    3.76    0.94
   2  12   0    3.10    1.22
   2  12   0    3.36    0.81
  -2  12   0    3.65    1.30
  -2  12   0    3.19    0.89
   2  12   0    5.60    1.07
  -3 -12   0   -0.06    0.53
   3 -12   0    0.00    0.54
   3  12   0    0.08    0.49
  -3  12   0   -0.41    0.55
  -3  12   0    0.17    0.52
   3  12   0    0.23    0.49
  -3  12   0   -0.32    0.51
   3  12   0    1.56    0.90
   3  12   0    1.56    0.90
  -3  12   0   -0.41    0.55
  -4 -12   0   12.89    1.58
   4 -12   0   10.07    1.55
   4  12   0   16.19    2.63
   4  12   0   11.00    1.29
   4  12   0   16.19    2.63
   4  12   0   13.92    1.63
  -4  12   0   18.11    1.80
  -4  12   0   13.34    1.66
  -5 -12   0    1.88    0.75
   5 -12   0    2.03    0.90
  -5  12   0    2.73    1.30
  -5  12   0    2.65    0.90
   5  12   0    2.04    0.74
   5  12   0    1.91    0.91
  -5  12   0    2.11    0.80
   5  12   0    1.91    0.68
   5  12   0    1.91    0.91
  -5  12   0    2.73    1.30
  -6 -12   0   11.21    1.45
   6 -12   0    8.09    1.46
  -6  12   0    9.58    2.34
  -6  12   0    7.64    1.36
  -6  12   0    9.59    2.34
  -6  12   0   12.26    1.58
   6  12   0    7.27    1.22
   6  12   0    9.50    1.97
   6  12   0    9.14    1.19
   6  12   0    9.50    1.97
   7 -12   0    2.56    0.98
  -7 -12   0    2.55    0.86
  -7  12   0    3.22    1.03
   7  12   0    2.53    0.75
   7  12   0    2.31    1.03
  -7  12   0    3.84    1.45
  -7  12   0    3.84    1.45
   7  12   0    2.31    1.03
  -7  12   0    1.46    0.77
   7  12   0    2.33    0.78
   8 -12   0    2.01    0.97
  -8  12   0    2.66    0.97
  -8  12   0    0.80    0.85
  -8  12   0    1.34    0.80
   8  12   0    2.61    0.74
   8  12   0    0.53    0.77
  -8  12   0    0.80    0.85
   8  12   0    0.53    0.77
   8  12   0    3.01    0.84
   9 -12   0    1.44    0.84
  -9  12   0    0.38    0.69
   9  12   0    1.92    0.70
   9  12   0    2.31    1.09
   9  12   0    2.31    1.09
  10 -12   0    3.14    1.10
  10  12   0    4.41    0.91
 -10  12   0    5.56    1.31
  11  12   0    0.73    0.59
  12  12   0    0.38    0.54
   0 -13   0   -0.52    0.54
   0  13   0    0.14    0.54
   0  13   0   -0.11    0.67
   0  13   0   -0.01    0.59
   0  13   0   -0.11    0.67
   1 -13   0    1.18    0.75
  -1 -13   0    1.40    0.80
  -1  13   0    0.64    0.76
  -1  13   0    0.64    0.75
   1  13   0    0.18    0.59
   1  13   0    0.27    0.72
  -1  13   0    1.97    0.80
   1  13   0   -0.21    0.57
  -1  13   0    0.00    0.54
   1  13   0    0.27    0.72
   2 -13   0    0.46    0.73
  -2 -13   0    1.51    0.84
  -2  13   0    1.05    0.74
  -2  13   0    2.52    1.27
   2  13   0    0.27    0.74
  -2  13   0    0.38    0.61
   2  13   0    1.22    0.71
  -2  13   0    2.52    1.27
   2  13   0    0.27    0.74
   2  13   0    1.10    0.68
   3 -13   0   -0.36    0.63
  -3 -13   0    0.19    0.69
   3  13   0    0.16    0.67
  -3  13   0    0.20    0.57
   3  13   0    0.12    0.53
  -3  13   0    0.62    0.76
   3  13   0    0.92    0.66
  -3  13   0    0.62    0.76
  -3  13   0    0.06    0.65
   3  13   0    0.16    0.66
   4 -13   0   18.20    2.12
  -4 -13   0   18.39    1.99
  -4  13   0   16.61    1.95
  -4  13   0   17.78    1.88
   4  13   0   13.94    2.56
  -4  13   0   12.10    2.51
   4  13   0   20.99    1.65
   4  13   0   13.94    2.56
   4  13   0   15.98    1.83
  -4  13   0   12.10    2.51
   5 -13   0    4.80    1.23
  -5 -13   0    4.82    1.12
   5  13   0    4.76    0.94
  -5  13   0    2.64    1.35
   5  13   0    3.04    1.33
  -5  13   0    4.94    1.14
  -5  13   0    2.64    1.35
   5  13   0    6.14    1.19
  -5  13   0    6.56    1.35
   5  13   0    3.04    1.33
   6 -13   0   23.58    2.49
  -6 -13   0   24.57    2.02
  -6  13   0   31.37    2.31
   6  13   0   20.06    2.99
  -6  13   0   32.19    4.32
  -6  13   0   22.49    2.39
   6  13   0   20.06    2.99
   6  13   0   24.31    1.98
  -6  13   0   32.19    4.31
   6  13   0   26.30    1.82
   7 -13   0    1.22    0.82
  -7  13   0    0.27    0.63
   7  13   0    1.90    0.68
   7  13   0    0.55    0.82
  -7  13   0    1.65    0.97
  -7  13   0    1.65    0.97
  -7  13   0    1.64    0.95
   7  13   0    0.55    0.82
   8 -13   0   15.86    2.16
   8  13   0   17.73    1.71
  -8  13   0   19.86    2.14
  -8  13   0   13.37    1.89
   9  13   0    1.27    0.69
  10  13   0   -0.68    0.44
   0 -14   0    2.12    1.04
   0  14   0    1.74    1.18
   0  14   0    1.14    0.79
   0  14   0    1.75    1.18
   0  14   0    2.27    0.87
  -1 -14   0    0.57    0.78
   1 -14   0    1.50    0.97
  -1  14   0    0.84    0.70
  -1  14   0    1.43    0.85
   1  14   0    0.80    0.74
  -1  14   0    1.10    1.10
   1  14   0    1.05    0.95
   1  14   0    1.05    0.95
   1  14   0    0.33    0.65
  -1  14   0    1.10    1.10
  -2 -14   0    0.77    0.77
   2 -14   0    1.10    0.88
  -2  14   0    0.05    0.72
   2  14   0    0.37    0.68
   2  14   0   -0.47    0.75
  -2  14   0   -0.32    0.56
   2  14   0   -0.47    0.75
   2  14   0    1.22    0.78
  -2  14   0    0.18    0.68
  -2  14   0    0.18    0.68
  -3 -14   0    7.54    1.44
   3 -14   0    7.10    1.47
  -3  14   0   10.04    1.51
  -3  14   0    5.81    1.30
   3  14   0    6.60    1.20
   3  14   0   11.14    2.45
   3  14   0    6.57    1.30
  -3  14   0    7.63    2.12
   3  14   0   11.14    2.45
  -3  14   0    7.63    2.12
  -4 -14   0    5.02    1.20
   4 -14   0    6.51    1.43
   4  14   0    6.04    1.27
   4  14   0    6.26    1.78
  -4  14   0    5.40    1.24
   4  14   0    6.26    1.78
  -4  14   0    7.75    1.38
  -4  14   0    7.60    2.18
  -4  14   0    7.60    2.18
  -5 -14   0   12.48    1.74
   5 -14   0   13.88    2.05
   5  14   0   16.90    1.95
  -5  14   0   14.72    2.94
  -5  14   0   17.66    2.06
  -5  14   0   14.72    2.94
   5  14   0   13.16    1.59
  -5  14   0   15.45    2.01
   6 -14   0   10.96    1.80
   6  14   0    8.02    1.26
  -6  14   0   11.41    1.66
  -6  14   0    8.62    2.50
  -6  14   0    8.62    2.50
  -6  14   0    5.94    1.33
  -7  14   0    9.87    1.59
   7  14   0    8.73    1.28
   8  14   0    0.62    0.67
   0 -15   0    0.43    0.79
   0  15   0    0.76    0.85
   0  15   0   -0.09    0.50
  -1 -15   0    1.88    0.99
   1 -15   0    2.34    1.03
   1  15   0    1.63    0.87
  -1  15   0    2.23    0.97
  -1  15   0    1.55    0.91
   1  15   0    2.25    0.96
  -2 -15   0    0.46    0.79
   2  15   0    1.49    0.88
  -2  15   0    2.54    0.91
  -2  15   0    2.01    0.99
   2  15   0   -0.15    0.57
  -3 -15   0    1.03    0.89
  -3  15   0    1.47    0.94
   3  15   0    1.85    0.92
   3  15   0    0.78    0.75
  -4 -15   0    1.57    0.99
   4  15   0   -0.07    0.62
  -4  15   0    1.68    1.02
   4  15   0    0.40    0.76
   5  15   0    0.40    0.70
  -5  15   0   -0.22    0.82
  20   0  -1   -0.38    0.62
  19   0  -1   -0.68    0.47
  18   0  -1   -0.11    0.64
  18   0  -1    0.01    0.53
 -18   0   1   -0.77    0.64
  17   0  -1    0.10    0.55
 -17   0   1   -0.35    0.60
  17   0  -1   -0.46    0.41
  16   0  -1   -0.30    0.39
 -16   0   1    0.23    0.56
  16   0  -1   -0.11    0.49
  15   0  -1   -0.60    0.39
 -15   0   1   -0.12    0.50
  15   0  -1    0.07    0.41
  14   0  -1   -0.21    0.37
  14   0  -1    0.17    0.46
 -14   0   1   -0.01    0.45
  13   0  -1    0.25    0.46
  13   0  -1   -0.11    0.32
  13   0  -1    0.69    0.48
 -13   0   1   -0.15    0.39
  12   0  -1    0.25    0.36
  12   0  -1   -0.22    0.31
 -12   0   1    0.22    0.34
 -12   0   1   -0.08    0.24
  12   0  -1   -0.15    0.31
  12   0  -1   -0.03    0.30
 -12   0   1   -0.08    0.24
 -11   0   1   -0.02    0.30
 -11   0   1    0.10    0.30
  11   0  -1   -0.21    0.30
  11   0  -1   -0.10    0.30
 -11   0   1   -0.23    0.21
  11   0  -1    0.21    0.37
  11   0  -1   -0.14    0.22
  11   0  -1   -0.14    0.22
  11   0  -1    0.30    0.32
 -11   0   1    0.10    0.30
 -10   0   1    0.04    0.21
  10   0  -1   -0.03    0.32
 -10   0   1   -0.28    0.19
 -10   0   1    0.21    0.30
  10   0  -1    0.13    0.19
  10   0  -1   -0.03    0.32
  10   0  -1    0.01    0.29
 -10   0   1    0.04    0.21
  10   0  -1    0.13    0.19
  10   0  -1    0.19    0.26
   9   0  -1    0.19    0.30
   9   0  -1   -0.42    0.24
   9   0  -1   -0.12    0.21
  -9   0   1   -0.18    0.18
  -9   0   1    0.06    0.25
   9   0  -1    0.19    0.30
   9   0  -1    0.21    0.27
   9   0  -1    0.21    0.27
  -9   0   1   -0.16    0.26
  -9   0   1    0.06    0.25
   8   0  -1    0.05    0.26
   8   0  -1    0.06    0.29
   8   0  -1    0.06    0.29
  -8   0   1   -0.18    0.19
   8   0  -1    0.05    0.26
   8   0  -1   -0.36    0.18
  -8   0   1    0.23    0.22
  -8   0   1    0.07    0.23
   8   0  -1    0.15    0.21
  -8   0   1   -0.18    0.19
  -7   0   1    0.14    0.24
  -7   0   1   -0.01    0.19
   7   0  -1   -0.18    0.23
  -7   0   1    0.43    0.34
   7   0  -1    0.26    0.30
   7   0  -1   -0.18    0.23
  -7   0   1    0.43    0.34
   7   0  -1    0.26    0.30
   7   0  -1    0.31    0.22
   7   0  -1   -0.47    0.16
   6   0  -1   -0.09    0.17
   6   0  -1    0.17    0.31
   6   0  -1    0.10    0.20
  -6   0   1   -0.20    0.18
  -6   0   1   -0.09    0.24
  -6   0   1   -0.09    0.24
  -6   0   1   -0.34    0.21
   6   0  -1    0.17    0.31
  -6   0   1   -0.40    0.16
   6   0  -1   -0.31    0.20
  -6   0   1   -0.26    0.18
  -6   0   1   -0.34    0.21
   6   0  -1    0.21    0.27
   6   0  -1    0.21    0.27
   5   0  -1   -0.18    0.24
   5   0  -1   -0.43    0.15
  -5   0   1   -0.25    0.17
  -5   0   1    0.27    0.19
  -5   0   1   -0.01    0.20
  -5   0   1   -0.25    0.17
   5   0  -1    0.01    0.27
  -5   0   1   -0.30    0.26
   5   0  -1    0.01    0.27
  -5   0   1   -0.30    0.26
   5   0  -1   -0.14    0.18
  -5   0   1   -0.14    0.18
   5   0  -1    0.04    0.24
   5   0  -1   -0.18    0.24
  -4   0   1   -0.01    0.24
  -4   0   1   -0.01    0.24
  -4   0   1    0.12    0.25
   4   0  -1    0.37    0.29
  -4   0   1    0.12    0.25
   4   0  -1   -0.18    0.14
  -4   0   1    0.02    0.15
   4   0  -1   -0.02    0.22
   4   0  -1   -0.02    0.22
   4   0  -1   -0.18    0.14
  -4   0   1   -0.14    0.15
  -4   0   1   -0.15    0.16
   4   0  -1    0.13    0.21
   4   0  -1    0.37    0.29
  -3   0   1   -0.23    0.21
   3   0  -1   -0.29    0.12
   3   0  -1    0.16    0.24
  -3   0   1    0.12    0.14
   3   0  -1    0.08    0.22
  -3   0   1    0.32    0.24
  -3   0   1    0.32    0.24
   3   0  -1   -0.09    0.13
   3   0  -1   -0.12    0.17
   3   0  -1    0.08    0.22
  -3   0   1   -0.17    0.15
   3   0  -1    0.16    0.24
  -3   0   1   -0.23    0.21
  -3   0   1   -0.03    0.15
  -2   0   1   -0.29    0.16
   2   0  -1   -0.38    0.13
  -2   0   1    0.07    0.16
  -2   0   1   -0.29    0.16
  -2   0   1    0.07    0.16
   2   0  -1   -0.15    0.09
  -2   0   1   -0.18    0.10
  -2   0   1   -0.39    0.10
  -2   0   1   -0.20    0.10
   2   0  -1   -0.38    0.13
   2   0  -1   -0.37    0.08
   2   0  -1   -0.12    0.12
   2   0  -1   -0.16    0.10
   2   0  -1   -0.37    0.09
  -1   0   1   -0.20    0.05
   1   0  -1   -0.16    0.05
  -1   0   1   -0.30    0.08
   1   0  -1   -0.27    0.08
  -1   0   1   -0.30    0.08
   1   0  -1   -0.21    0.07
   1   0  -1   -0.22    0.06
  -1   0   1   -0.18    0.06
  -1   0   1   -0.31    0.04
   1   0  -1   -0.27    0.08
  -1   0   1   -0.30    0.05
   1   0  -1   -0.21    0.07
   1   0  -1   -0.23    0.05
  -1   0   1   -0.31    0.04
   0   0  -1   -0.48    0.06
   0   0   1   -0.58    0.03
   0   0  -1   -0.48    0.06
   0   0  -1   -0.39    0.05
   0   0  -1   -0.42    0.05
  -1   0  -1   -0.54    0.08
   1   0   1   -0.39    0.07
  -1   0  -1   -0.42    0.11
  -1   0  -1   -0.51    0.07
   1   0   1   -0.47    0.06
  -1   0  -1   -0.42    0.11
  -1   0  -1   -0.51    0.09
  -1   0  -1   -0.52    0.09
   1   0   1   -0.60    0.04
   1   0   1   -0.53    0.08
   1   0   1   -0.53    0.08
   1   0   1   -0.62    0.05
  -2   0  -1    0.01    0.12
   2   0   1   -0.10    0.09
   2   0   1   -0.01    0.10
   2   0   1   -0.12    0.12
  -2   0  -1   -0.09    0.12
   2   0   1    0.13    0.10
  -2   0  -1   -0.09    0.12
   2   0   1    0.13    0.17
   2   0   1    0.07    0.16
   2   0   1    0.10    0.16
  -2   0  -1    0.01    0.16
  -2   0  -1    0.03    0.11
   2   0   1    0.13    0.17
  -2   0  -1    0.01    0.16
   3   0   1   -0.12    0.17
   3   0   1    0.01    0.20
   3   0   1    0.01    0.20
   3   0   1   -0.12    0.17
  -3   0  -1    0.41    0.24
   3   0   1    0.09    0.13
   3   0   1   -0.02    0.11
  -3   0  -1    0.11    0.18
  -3   0  -1    0.14    0.15
  -3   0  -1    0.13    0.16
   3   0   1   -0.02    0.12
  -3   0  -1    0.11    0.18
  -3   0  -1    0.41    0.24
   3   0   1    0.02    0.16
   4   0   1   -0.18    0.20
  -4   0  -1   -0.04    0.19
   4   0   1    0.14    0.16
  -4   0  -1   -0.12    0.17
   4   0   1   -0.08    0.09
  -4   0  -1    0.01    0.19
   4   0   1   -0.18    0.20
   4   0   1   -0.05    0.12
  -4   0  -1    0.01    0.19
   4   0   1    0.05    0.20
   4   0   1    0.05    0.20
  -4   0  -1   -0.04    0.19
   4   0   1   -0.39    0.15
  -4   0  -1    0.08    0.17
   5   0   1   -0.10    0.18
  -5   0  -1   -0.18    0.17
  -5   0  -1   -0.18    0.17
   5   0   1   -0.03    0.15
  -5   0  -1   -0.28    0.16
   5   0   1   -0.14    0.18
  -5   0  -1    0.08    0.19
   5   0   1   -0.29    0.13
  -5   0  -1    0.03    0.20
   5   0   1   -0.10    0.18
   5   0   1   -0.10    0.09
  -5   0  -1   -0.28    0.16
   5   0   1   -0.10    0.09
  -6   0  -1    0.13    0.22
  -6   0  -1    0.00    0.20
   6   0   1    0.09    0.14
   6   0   1    0.21    0.23
  -6   0  -1   -0.15    0.16
  -6   0  -1    0.13    0.22
   6   0   1   -0.34    0.14
   6   0   1    0.27    0.19
   6   0   1    0.09    0.14
   6   0   1    0.22    0.26
   6   0   1    0.22    0.26
   7   0   1   -0.24    0.21
   7   0   1   -0.17    0.15
   7   0   1   -0.06    0.22
   7   0   1   -0.02    0.11
  -7   0  -1    0.21    0.26
   7   0   1    0.09    0.18
   7   0   1   -0.06    0.22
  -7   0  -1   -0.26    0.17
   7   0   1   -0.02    0.11
  -7   0  -1   -0.18    0.20
  -7   0  -1    0.21    0.26
   8   0   1   -0.01    0.14
   8   0   1    0.07    0.27
   8   0   1    0.08    0.27
   8   0   1   -0.01    0.14
   8   0   1    0.43    0.29
  -8   0  -1   -0.12    0.21
  -8   0  -1    0.04    0.18
  -8   0  -1    0.04    0.18
   8   0   1   -0.14    0.19
   9   0   1   -0.01    0.31
   9   0   1    0.33    0.31
  -9   0  -1    0.16    0.27
   9   0   1   -0.09    0.13
  -9   0  -1    0.16    0.27
  -9   0  -1    0.41    0.30
   9   0   1   -0.09    0.13
   9   0   1   -0.16    0.21
  10   0   1   -0.07    0.14
  10   0   1    0.06    0.28
 -10   0  -1    0.93    0.40
  10   0   1   -0.27    0.20
 -10   0  -1   -0.29    0.25
 -10   0  -1    0.93    0.40
  10   0   1    0.02    0.24
  10   0   1   -0.07    0.14
  11   0   1   -0.30    0.27
  11   0   1    0.18    0.30
  11   0   1    0.18    0.20
  11   0   1    0.18    0.20
 -11   0  -1   -0.17    0.22
 -11   0  -1   -0.17    0.22
 -11   0  -1   -0.59    0.24
 -12   0  -1    0.33    0.40
  12   0   1   -0.13    0.29
  12   0   1   -0.15    0.34
 -13   0  -1   -0.38    0.37
  13   0   1   -0.08    0.43
  13   0   1   -0.37    0.29
 -14   0  -1   -0.46    0.44
  14   0   1    0.07    0.46
  14   0   1   -0.03    0.38
 -15   0  -1    0.04    0.55
  15   0   1    0.19    0.51
  15   0   1   -0.25    0.40
  16   0   1    0.60    0.50
  16   0   1   -0.66    0.46
 -16   0  -1    0.03    0.61
  17   0   1    0.02    0.50
  18   0   1    0.41    0.58
  19   0   1   -0.39    0.54
  20  -1  -1    0.18    0.69
  20   1  -1    0.98    0.75
  19  -1  -1    5.55    1.09
  19  -1  -1    4.49    1.19
  19   1  -1    6.31    1.10
  18  -1  -1    3.95    1.11
  18  -1  -1    3.80    0.96
 -18   1   1    4.41    1.11
  18   1  -1    4.45    0.93
  17  -1  -1    0.95    0.63
  17  -1  -1   -0.03    0.55
 -17  -1   1    0.41    0.68
  17   1  -1    0.53    0.62
 -17   1   1    0.73    0.74
  17   1  -1    0.89    0.60
 -16  -1   1    7.34    1.15
  16  -1  -1    7.41    1.25
  16  -1  -1    6.38    1.02
 -16   1   1    4.56    1.00
  16   1  -1    4.36    0.98
  16   1  -1    5.63    0.91
  16   1  -1    6.08    1.52
  15  -1  -1    2.27    0.65
  15  -1  -1    2.20    0.74
 -15  -1   1    4.17    0.87
  15   1  -1    4.74    0.82
  15   1  -1    5.52    1.43
 -15   1   1    4.28    0.92
  15   1  -1    2.83    0.79
  15   1  -1    5.54    1.43
  14  -1  -1   13.62    1.53
 -14  -1   1   14.05    1.44
  14  -1  -1   12.78    1.23
  14   1  -1   10.17    1.77
  14   1  -1   10.97    1.33
  14   1  -1   10.68    1.10
  14   1  -1   10.15    1.77
 -14   1   1   11.55    1.33
  13  -1  -1   13.42    1.45
 -13  -1   1   11.50    1.22
  13  -1  -1   12.17    1.16
  13   1  -1   11.26    1.81
  13   1  -1   13.46    1.05
  13   1  -1   12.79    1.36
  13   1  -1   11.27    1.81
 -13   1   1   11.36    1.29
 -12  -1   1   -0.15    0.35
 -12  -1   1   -0.05    0.25
 -12  -1   1   -0.05    0.25
  12  -1  -1   -0.21    0.33
  12  -1  -1    0.56    0.35
  12   1  -1   -0.26    0.31
 -12   1   1    0.29    0.39
  12   1  -1    0.00    0.31
 -12   1   1   -0.37    0.17
  12   1  -1    0.08    0.37
  12   1  -1   -0.26    0.31
 -12   1   1   -0.37    0.17
 -11  -1   1   17.01    2.02
  11  -1  -1   15.18    2.07
 -11  -1   1   14.56    1.11
  11  -1  -1   15.18    2.07
 -11  -1   1   17.01    2.02
  11  -1  -1   16.81    1.27
  11  -1  -1   13.46    1.00
 -11   1   1   11.09    1.69
  11   1  -1   21.95    2.37
  11   1  -1   15.82    1.01
  11   1  -1   16.83    2.00
 -11   1   1   11.09    1.69
 -11   1   1   14.16    0.98
  11   1  -1   16.83    1.99
  11   1  -1   12.90    1.28
 -11   1   1   15.50    1.17
  11   1  -1   21.94    2.37
  10  -1  -1    4.69    0.77
 -10  -1   1    5.25    1.03
 -10  -1   1    5.11    0.73
  10  -1  -1    4.30    0.62
  10  -1  -1    6.02    1.22
 -10  -1   1    5.25    1.03
  10  -1  -1    4.50    1.05
 -10  -1   1    4.55    0.57
  10  -1  -1    6.02    1.22
  10   1  -1    5.69    1.11
 -10   1   1    4.15    0.59
 -10   1   1    4.78    1.11
  10   1  -1    3.55    0.91
  10   1  -1    3.55    0.91
 -10   1   1    4.78    1.11
  10   1  -1    3.62    0.53
  10   1  -1    5.41    0.79
 -10   1   1    4.46    0.72
  10   1  -1    5.69    1.11
   9  -1  -1   23.44    1.37
   9  -1  -1   20.62    1.10
  -9  -1   1   18.88    1.60
   9  -1  -1   19.30    2.06
  -9  -1   1   19.33    0.97
  -9  -1   1   20.46    1.16
   9  -1  -1   19.89    2.10
   9  -1  -1   19.89    2.11
  -9  -1   1   18.88    1.60
   9   1  -1   19.34    1.65
   9   1  -1   17.49    1.84
  -9   1   1   18.68    1.06
   9   1  -1   20.44    1.24
   9   1  -1   19.34    1.65
   9   1  -1   19.19    1.02
  -9   1   1   19.37    1.20
   9   1  -1   17.49    1.84
  -9   1   1   19.51    2.04
  -9   1   1   19.51    2.04
   8  -1  -1   12.12    1.52
  -8  -1   1   14.25    1.58
  -8  -1   1   13.07    0.87
   8  -1  -1   13.21    1.60
   8  -1  -1   13.16    1.59
  -8  -1   1   14.25    1.58
   8  -1  -1   13.19    0.83
   8  -1  -1   12.12    1.52
   8  -1  -1   11.40    0.94
  -8  -1   1   11.80    0.73
   8   1  -1   11.41    1.39
  -8   1   1   11.80    0.82
  -8   1   1    9.47    1.37
   8   1  -1   11.41    1.39
   8   1  -1   13.62    1.58
   8   1  -1   13.50    0.81
   8   1  -1   12.26    0.92
  -8   1   1    9.47    1.37
   8   1  -1   13.62    1.58
  -8   1   1   13.45    0.93
  -7  -1   1    3.65    0.53
   7  -1  -1    3.81    0.83
  -7  -1   1    4.15    0.80
  -7  -1   1    4.15    0.80
   7  -1  -1    3.80    0.83
   7  -1  -1    4.18    0.86
   7  -1  -1    2.33    0.39
  -7  -1   1    3.39    0.40
   7  -1  -1    2.63    0.51
  -7  -1   1    3.46    0.50
   7  -1  -1    4.18    0.86
   7   1  -1    3.05    0.69
   7   1  -1    3.47    0.74
  -7   1   1    3.60    0.54
  -7   1   1    2.98    0.43
   7   1  -1    3.62    0.45
   7   1  -1    3.32    0.47
   7   1  -1    3.05    0.69
   7   1  -1    3.47    0.74
   7   1  -1    3.38    0.53
  -7   1   1    3.37    0.78
  -7   1   1    3.37    0.78
   6  -1  -1    1.12    0.48
  -6  -1   1    0.91    0.31
   6  -1  -1    1.75    0.36
  -6  -1   1    0.98    0.42
   6  -1  -1    1.14    0.48
  -6  -1   1    0.83    0.36
  -6  -1   1    0.83    0.36
  -6  -1   1    0.98    0.42
  -6  -1   1    1.49    0.34
   6  -1  -1    1.45    0.31
  -6  -1   1    1.51    0.29
   6  -1  -1    1.34    0.49
   6  -1  -1    1.07    0.37
   6  -1  -1    1.34    0.49
   6   1  -1    1.77    0.31
   6   1  -1    1.70    0.52
   6   1  -1    1.25    0.30
   6   1  -1    1.39    0.47
  -6   1   1    0.78    0.41
  -6   1   1    1.91    0.35
  -6   1   1    1.56    0.37
  -6   1   1    1.18    0.43
   6   1  -1    1.39    0.47
   6   1  -1    1.70    0.52
   6   1  -1    1.53    0.37
  -6   1   1    1.83    0.38
  -6   1   1    1.18    0.43
  -6   1   1    0.78    0.41
  -5  -1   1    2.19    0.53
   5  -1  -1    2.50    0.39
  -5  -1   1    2.74    0.57
   5  -1  -1    1.71    0.30
  -5  -1   1    2.64    0.32
   5  -1  -1    1.75    0.50
   5  -1  -1    3.47    0.70
  -5  -1   1    2.74    0.57
  -5  -1   1    2.19    0.52
   5  -1  -1    3.47    0.71
   5  -1  -1    2.54    0.45
   5  -1  -1    1.76    0.51
  -5  -1   1    2.49    0.37
  -5  -1   1    2.42    0.40
   5   1  -1    2.94    0.61
  -5   1   1    1.74    0.53
   5   1  -1    2.34    0.37
   5   1  -1    1.94    0.51
  -5   1   1    2.51    0.35
   5   1  -1    1.94    0.51
  -5   1   1    2.26    0.41
   5   1  -1    2.94    0.61
   5   1  -1    2.00    0.30
   5   1  -1    2.36    0.40
  -5   1   1    1.92    0.53
  -5   1   1    1.74    0.53
  -5   1   1    2.06    0.38
  -5   1   1    1.92    0.53
   4  -1  -1    8.90    0.96
  -4  -1   1    7.79    0.87
   4  -1  -1   11.34    1.13
   4  -1  -1    8.96    0.97
  -4  -1   1    7.73    0.45
   4  -1  -1   11.34    1.13
  -4  -1   1    7.79    0.86
  -4  -1   1    8.35    0.56
   4  -1  -1    7.76    0.56
   4  -1  -1    8.44    0.51
  -4  -1   1   10.33    0.82
  -4  -1   1   10.33    0.82
  -4  -1   1    7.85    0.52
   4  -1  -1    6.01    0.59
  -4   1   1    8.62    0.58
  -4   1   1    9.19    0.97
  -4   1   1    8.43    0.62
  -4   1   1    7.71    0.94
   4   1  -1    7.59    0.52
   4   1  -1    7.53    0.54
  -4   1   1    8.37    0.52
   4   1  -1    6.95    0.83
  -4   1   1    7.71    0.94
  -4   1   1    9.19    0.98
   4   1  -1    6.78    0.81
   4   1  -1    6.95    0.83
   4   1  -1    6.78    0.81
   4   1  -1    8.76    0.50
  -3  -1   1   97.07    3.02
  -3  -1   1   97.08    3.03
   3  -1  -1   91.91    2.48
  -3  -1   1   88.67    3.00
   3  -1  -1   87.97    2.54
   3  -1  -1   91.92    3.15
  -3  -1   1   88.67    3.00
   3  -1  -1   90.48    2.62
  -3  -1   1   88.29    2.43
   3  -1  -1   91.92    3.15
  -3  -1   1   97.13    2.56
  -3  -1   1   92.42    2.52
   3  -1  -1   94.23    3.13
   3   1  -1   96.87    3.06
   3   1  -1   86.83    2.54
   3   1  -1   92.57    2.45
  -3   1   1   89.85    2.49
  -3   1   1   88.39    2.56
  -3   1   1   90.82    2.61
  -3   1   1   93.28    3.10
   3   1  -1   96.87    3.06
  -3   1   1   87.70    3.13
  -3   1   1   87.70    3.13
  -3   1   1   93.27    3.10
  -2  -1   1    4.79    0.34
  -2  -1   1    3.71    0.30
   2  -1  -1    3.77    0.36
   2  -1  -1    4.22    0.53
   2  -1  -1    4.39    0.30
   2  -1  -1    4.15    0.32
   2  -1  -1    4.22    0.53
  -2  -1   1    3.91    0.28
  -2  -1   1    4.33    0.50
  -2  -1   1    4.33    0.50
  -2   1   1    3.36    0.50
   2   1  -1    3.78    0.47
   2   1  -1    5.09    0.33
  -2   1   1    4.53    0.51
  -2   1   1    4.19    0.31
   2   1  -1    3.78    0.47
  -2   1   1    4.56    0.34
   2   1  -1    4.15    0.28
   2   1  -1    3.37    0.32
  -2   1   1    4.48    0.51
  -2   1   1    3.36    0.50
  -2   1   1    3.77    0.36
   1  -1  -1    0.79    0.15
   1  -1  -1    0.64    0.12
  -1  -1   1    0.34    0.11
  -1  -1   1    0.69    0.15
  -1  -1   1    0.72    0.15
   1  -1  -1    0.45    0.14
   1   1  -1    1.11    0.27
   1   1  -1    0.69    0.13
  -1   1   1    0.73    0.24
   1   1  -1    1.11    0.27
  -1   1   1    0.73    0.24
  -1   1   1    0.75    0.14
   1   1  -1    0.75    0.16
   1   1  -1    0.45    0.13
  -1   1   1    0.68    0.12
   0  -1  -1    7.03    0.28
   0  -1  -1    6.77    0.38
   0  -1  -1    6.77    0.38
   0  -1   1    6.61    0.30
   0  -1   1    7.15    0.36
   0  -1  -1    6.64    0.29
   0   1   1    6.14    0.37
   0   1   1    6.14    0.37
   0   1  -1    7.09    0.32
   0   1  -1    7.72    0.52
   0   1  -1    6.86    0.36
   0   1  -1    6.44    0.34
   0   1   1    6.51    0.26
   0   1  -1    7.72    0.52
   1  -1   1    1.84    0.26
  -1  -1  -1    1.99    0.16
   1  -1   1    2.02    0.21
  -1  -1  -1    1.90    0.17
   1  -1   1    1.94    0.25
  -1  -1  -1    2.05    0.24
  -1  -1  -1    2.05    0.24
   1   1   1    1.88    0.24
   1   1   1    1.78    0.13
  -1   1  -1    1.85    0.38
  -1   1  -1    1.47    0.24
   1   1   1    1.86    0.15
   1   1   1    2.23    0.16
  -1   1  -1    2.28    0.26
  -1   1  -1    1.89    0.21
  -1   1  -1    1.85    0.38
   1   1   1    1.88    0.24
  -2  -1  -1  150.24    3.71
  -2  -1  -1  146.51    4.06
   2  -1   1  150.39    3.87
   2  -1   1  148.33    3.82
   2  -1   1  153.85    3.92
  -2  -1  -1  150.41    3.73
  -2  -1  -1  147.19    4.07
  -2  -1  -1  146.52    4.05
  -2  -1  -1  147.20    4.07
   2   1   1  150.61    3.71
   2   1   1  155.52    4.12
  -2   1  -1  151.22    4.45
  -2   1  -1  151.07    3.87
  -2   1  -1  142.14    3.82
  -2   1  -1  151.21    4.45
  -2   1  -1  152.56    3.91
   2   1   1  150.70    4.10
   2   1   1  145.99    3.71
   2   1   1  150.71    4.10
   2   1   1  155.51    4.12
   2   1   1  149.99    3.73
   3  -1   1    0.08    0.17
  -3  -1  -1   -0.22    0.14
   3  -1   1   -0.19    0.17
  -3  -1  -1   -0.04    0.14
  -3  -1  -1    0.04    0.13
   3  -1   1    0.08    0.17
  -3  -1  -1   -0.03    0.18
  -3  -1  -1   -0.22    0.14
   3  -1   1   -0.07    0.15
  -3  -1  -1   -0.03    0.18
   3  -1   1    0.02    0.14
   3   1   1   -0.08    0.17
   3   1   1    0.17    0.12
  -3   1  -1    0.04    0.19
  -3   1  -1    0.03    0.26
   3   1   1    0.15    0.12
   3   1   1    0.17    0.20
   3   1   1   -0.08    0.12
   3   1   1    0.17    0.20
  -3   1  -1   -0.09    0.14
  -3   1  -1   -0.11    0.16
  -3   1  -1    0.03    0.26
   3   1   1   -0.20    0.13
   3   1   1   -0.08    0.17
   4  -1   1    5.43    0.42
   4  -1   1    5.86    0.53
   4  -1   1    6.07    0.59
  -4  -1  -1    6.28    0.68
  -4  -1  -1    5.37    0.41
  -4  -1  -1    6.28    0.68
  -4  -1  -1    6.41    0.71
  -4  -1  -1    6.14    0.45
  -4  -1  -1    6.41    0.71
   4   1   1    7.32    0.76
  -4   1  -1    6.29    0.82
   4   1   1    5.35    0.68
   4   1   1    5.35    0.68
  -4   1  -1    6.29    0.82
   4   1   1    7.32    0.76
  -4   1  -1    6.63    0.48
   4   1   1    5.02    0.37
  -4   1  -1    5.79    0.76
  -4   1  -1    6.19    0.56
   4   1   1    5.68    0.38
   4   1   1    6.71    0.44
   4   1   1    7.01    0.49
  -4   1  -1    6.09    0.58
  -4   1  -1    5.79    0.77
  -5  -1  -1    9.20    0.92
  -5  -1  -1    9.20    0.92
   5  -1   1    7.93    0.60
  -5  -1  -1    6.13    0.78
   5  -1   1    7.19    0.96
  -5  -1  -1    8.65    0.55
   5  -1   1    8.79    0.68
   5  -1   1    7.19    0.95
  -5  -1  -1    6.13    0.78
   5  -1   1    7.72    0.53
  -5  -1  -1    8.09    0.58
  -5   1  -1    9.35    1.07
   5   1   1    7.41    0.89
   5   1   1    7.86    0.48
   5   1   1    8.67    0.50
  -5   1  -1    9.35    1.07
  -5   1  -1    9.00    0.64
  -5   1  -1    7.94    0.71
  -5   1  -1    7.60    0.54
  -5   1  -1    8.32    0.99
   5   1   1    7.88    0.58
   5   1   1    8.30    0.54
   5   1   1    8.74    0.93
   5   1   1    8.74    0.93
   5   1   1    7.41    0.89
  -5   1  -1    8.32    0.99
  -6  -1  -1    4.54    0.75
  -6  -1  -1    4.54    0.75
  -6  -1  -1    2.89    0.43
  -6  -1  -1    3.63    0.45
   6  -1   1    2.92    0.68
   6  -1   1    3.16    0.41
   6  -1   1    2.92    0.68
   6  -1   1    3.38    0.53
   6  -1   1    3.29    0.46
   6   1   1    3.08    0.36
  -6   1  -1    3.10    0.67
  -6   1  -1    2.07    0.34
   6   1   1    3.24    0.63
  -6   1  -1    3.07    0.49
   6   1   1    2.85    0.60
  -6   1  -1    3.10    0.67
   6   1   1    2.85    0.44
   6   1   1    3.17    0.42
   6   1   1    3.04    0.36
  -6   1  -1    3.39    0.49
   6   1   1    3.24    0.63
   6   1   1    2.85    0.60
   7  -1   1    4.94    0.66
  -7  -1  -1    5.22    0.62
   7  -1   1    5.84    0.58
  -7  -1  -1    4.85    0.57
  -7  -1  -1    8.78    1.10
   7  -1   1    6.08    1.03
  -7  -1  -1    8.78    1.10
   7  -1   1    6.08    1.03
   7   1   1    5.74    0.90
  -7   1  -1    4.63    0.49
  -7   1  -1    5.18    0.92
  -7   1  -1    5.18    0.92
   7   1   1    5.11    0.51
  -7   1  -1    5.15    0.63
   7   1   1    5.83    0.60
   7   1   1    5.97    0.65
   7   1   1    7.35    1.05
   7   1   1    7.35    1.06
   7   1   1    5.97    0.48
   7   1   1    5.74    0.90
   8  -1   1    2.31    0.52
  -8  -1  -1    2.02    0.57
   8  -1   1    4.00    0.53
   8  -1   1    4.56    0.91
  -8  -1  -1    2.09    0.42
   8  -1   1    4.56    0.91
  -8  -1  -1    2.01    0.58
  -8   1  -1    2.01    0.45
  -8   1  -1    2.77    0.72
   8   1   1    3.03    0.51
   8   1   1    2.68    0.67
   8   1   1    3.17    0.44
   8   1   1    2.68    0.67
  -8   1  -1    3.05    0.44
   8   1   1    1.26    0.49
  -8   1  -1    2.77    0.72
   8   1   1    1.26    0.49
   9  -1   1    6.08    1.17
   9  -1   1    5.02    0.75
   9  -1   1    6.08    1.17
  -9  -1  -1    3.72    0.81
  -9  -1  -1    5.64    0.68
   9  -1   1    5.36    0.62
  -9  -1  -1    3.72    0.81
   9   1   1    5.84    1.02
  -9   1  -1    4.37    0.56
  -9   1  -1    5.05    0.71
   9   1   1    5.37    0.59
   9   1   1    4.65    0.68
   9   1   1    4.29    0.90
  -9   1  -1    5.03    1.02
   9   1   1    4.29    0.91
   9   1   1    5.84    1.02
  -9   1  -1    5.03    1.02
 -10  -1  -1    2.99    0.73
  10  -1   1    3.33    0.69
 -10  -1  -1    3.88    0.63
  10  -1   1    4.36    0.60
 -10  -1  -1    2.99    0.73
  10  -1   1    2.93    0.83
  10  -1   1    2.93    0.83
  10   1   1    4.67    0.99
  10   1   1    4.67    0.99
  10   1   1    4.28    0.95
 -10   1  -1    4.35    0.73
  10   1   1    5.01    0.62
 -10   1  -1    4.83    1.03
 -10   1  -1    4.83    1.03
  10   1   1    4.28    0.95
  10   1   1    3.78    0.66
  11  -1   1   11.04    1.71
 -11  -1  -1   14.90    1.77
 -11  -1  -1   14.90    1.77
  11  -1   1   12.35    0.94
  11  -1   1   11.05    1.70
  11  -1   1   12.42    1.28
 -11  -1  -1   13.58    1.04
  11   1   1   11.53    1.18
 -11   1  -1   11.68    1.66
  11   1   1   12.01    1.70
  11   1   1   12.60    1.71
  11   1   1   12.01    1.69
 -11   1  -1   12.94    1.24
 -11   1  -1   11.68    1.66
  11   1   1   12.53    1.71
  11   1   1   12.45    0.91
  12  -1   1   23.57    1.36
  12  -1   1   22.04    1.56
 -12  -1  -1   22.85    1.44
 -12   1  -1   24.78    1.55
  12   1   1   22.16    2.40
  12   1   1   22.36    2.42
  12   1   1   24.88    1.33
  12   1   1   25.43    1.57
  13  -1   1    0.24    0.47
  13  -1   1    0.53    0.40
 -13  -1  -1    0.43    0.47
  13   1   1    0.19    0.37
 -13   1  -1    0.48    0.53
  13   1   1    0.81    0.43
  13   1   1    0.46    0.45
  14  -1   1    3.74    0.85
 -14  -1  -1    5.01    0.88
  14  -1   1    4.60    0.80
 -14   1  -1    4.22    0.88
  14   1   1    5.19    0.79
  14   1   1    2.56    0.71
 -15  -1  -1   14.25    1.48
  15  -1   1   15.30    1.69
  15  -1   1   12.37    1.29
 -15   1  -1   12.53    1.48
  15   1   1   10.82    1.15
  15   1   1   14.32    1.56
  16  -1   1    0.26    0.57
  16  -1   1    0.45    0.50
  16   1   1    0.74    0.50
  16   1   1   -0.46    0.49
 -16   1  -1    0.27    0.69
  17  -1   1    6.77    1.25
  17  -1   1    7.32    1.14
 -17   1  -1    7.13    1.27
  17   1   1    6.78    1.01
  18  -1   1    0.15    0.60
  18   1   1    0.11    0.55
  19  -1   1    1.79    0.79
  19   1   1    2.06    0.76
  19  -2  -1    0.28    0.84
  19  -2  -1    0.21    0.68
 -19   2   1   -0.14    0.82
  19   2  -1    0.29    0.58
  18  -2  -1    2.94    0.92
  18  -2  -1    2.73    1.04
  18   2  -1    4.23    0.92
 -18   2   1    4.70    1.17
  17  -2  -1   10.04    1.56
 -17  -2   1    8.24    1.29
  17  -2  -1    7.74    1.17
  17   2  -1    9.27    1.91
  17   2  -1    9.14    1.38
  17   2  -1    9.00    1.16
 -17   2   1    9.64    1.49
 -16  -2   1    0.74    0.66
  16  -2  -1   -0.13    0.50
  16  -2  -1    0.17    0.54
  16   2  -1    0.05    0.53
  16   2  -1    0.05    0.49
  16   2  -1    0.06    0.49
 -16   2   1    0.98    0.68
  16   2  -1   -0.13    0.40
  15  -2  -1    6.52    1.19
  15  -2  -1    5.62    0.94
 -15  -2   1    5.16    0.96
  15   2  -1    3.38    1.10
 -15   2   1    4.72    1.03
  15   2  -1    4.56    0.95
  15   2  -1    3.38    1.10
  15   2  -1    5.44    0.84
 -14  -2   1    0.68    0.48
  14  -2  -1    0.16    0.43
  14  -2  -1   -0.28    0.42
  14   2  -1    0.26    0.44
  14   2  -1    0.26    0.44
 -14   2   1    0.59    0.53
  14   2  -1   -0.40    0.30
  14   2  -1   -0.25    0.40
 -13  -2   1    1.94    0.59
  13  -2  -1    2.69    0.78
  13  -2  -1    2.87    0.64
  13   2  -1    1.95    0.52
  13   2  -1    3.03    0.74
  13   2  -1    2.20    0.83
  13   2  -1    2.20    0.83
 -13   2   1    3.62    0.80
  12  -2  -1    3.26    0.79
  12  -2  -1    2.75    0.62
 -12  -2   1    3.40    0.67
  12   2  -1    3.93    0.75
  12   2  -1    4.07    1.06
 -12   2   1    5.10    0.88
  12   2  -1    4.07    1.06
 -12   2   1    2.82    0.93
  12   2  -1    2.59    0.55
 -12   2   1    2.82    0.93
 -11  -2   1    4.67    1.01
  11  -2  -1    4.67    0.69
 -11  -2   1    4.67    1.01
  11  -2  -1    5.41    1.23
 -11  -2   1    4.62    0.74
  11  -2  -1    4.84    0.86
  11  -2  -1    5.41    1.23
 -11   2   1    4.46    0.67
  11   2  -1    4.31    0.97
 -11   2   1    4.52    1.11
 -11   2   1    4.52    1.11
 -11   2   1    4.72    0.78
  11   2  -1    4.31    0.97
  11   2  -1    4.68    0.79
  11   2  -1    5.03    0.67
  10  -2  -1   19.80    1.38
  10  -2  -1   20.25    1.17
 -10  -2   1   19.68    2.06
  10  -2  -1   15.49    1.99
 -10  -2   1   20.54    1.21
  10  -2  -1   15.49    1.99
 -10  -2   1   19.68    2.06
 -10   2   1   19.38    1.29
  10   2  -1   20.42    1.28
 -10   2   1   22.57    2.42
  10   2  -1   16.23    1.89
 -10   2   1   20.17    1.18
 -10   2   1   22.57    2.42
  10   2  -1   20.31    1.11
  10   2  -1   16.23    1.89
  -9  -2   1    2.17    0.37
   9  -2  -1    1.57    0.41
   9  -2  -1    2.09    0.56
   9  -2  -1    2.54    0.79
  -9  -2   1    2.62    0.69
  -9  -2   1    2.62    0.69
  -9  -2   1    2.02    0.47
   9  -2  -1    2.54    0.79
  -9   2   1    3.12    0.88
   9   2  -1    2.20    0.68
  -9   2   1    3.12    0.88
   9   2  -1    2.64    0.46
  -9   2   1    2.74    0.49
   9   2  -1    2.47    0.54
   9   2  -1    2.20    0.67
  -9   2   1    2.03    0.51
  -8  -2   1    2.36    0.37
  -8  -2   1    2.85    0.49
   8  -2  -1    3.12    0.84
   8  -2  -1    2.86    0.61
  -8  -2   1    3.45    0.81
  -8  -2   1    3.45    0.81
   8  -2  -1    3.12    0.84
   8  -2  -1    3.36    0.49
  -8   2   1    4.25    0.95
   8   2  -1    4.13    0.85
  -8   2   1    3.26    0.50
   8   2  -1    4.13    0.85
   8   2  -1    2.55    0.40
   8   2  -1    2.49    0.49
  -8   2   1    3.30    0.57
  -8   2   1    4.25    0.95
  -7  -2   1    1.46    0.36
  -7  -2   1    2.74    0.65
   7  -2  -1    1.79    0.47
  -7  -2   1    2.74    0.65
   7  -2  -1    2.36    0.42
   7  -2  -1    1.42    0.55
  -7  -2   1    2.42    0.35
   7  -2  -1    1.42    0.55
  -7   2   1    1.47    0.39
   7   2  -1    1.72    0.33
  -7   2   1    3.53    0.86
  -7   2   1    2.84    0.46
   7   2  -1    1.75    0.56
   7   2  -1    1.99    0.43
  -7   2   1    3.53    0.86
   7   2  -1    1.75    0.56
  -6  -2   1    0.73    0.28
  -6  -2   1    0.29    0.31
  -6  -2   1   -0.19    0.22
   6  -2  -1    0.34    0.30
  -6  -2   1    0.24    0.15
  -6  -2   1   -0.19    0.22
  -6  -2   1    0.29    0.31
  -6  -2   1    0.15    0.22
   6  -2  -1    0.12    0.21
   6  -2  -1    0.32    0.29
   6  -2  -1    0.34    0.30
   6   2  -1    0.39    0.27
   6   2  -1    0.30    0.21
   6   2  -1    0.33    0.31
  -6   2   1   -0.05    0.29
  -6   2   1    0.05    0.23
  -6   2   1    0.20    0.22
  -6   2   1    0.16    0.28
   6   2  -1    0.57    0.22
  -6   2   1   -0.05    0.29
   6   2  -1    0.33    0.31
  -6   2   1    0.16    0.28
   5  -2  -1    5.06    0.63
  -5  -2   1    5.32    0.79
   5  -2  -1    6.74    0.65
  -5  -2   1    7.91    0.96
  -5  -2   1    5.32    0.79
  -5  -2   1    7.91    0.96
   5  -2  -1    5.21    0.50
  -5  -2   1    4.93    0.53
  -5  -2   1    5.67    0.44
   5  -2  -1    4.44    0.84
   5  -2  -1    4.44    0.84
  -5  -2   1    5.61    0.54
   5   2  -1    6.17    0.88
  -5   2   1    5.01    0.58
   5   2  -1    5.27    0.43
   5   2  -1    4.57    0.52
  -5   2   1    5.76    0.89
   5   2  -1    5.20    0.53
  -5   2   1    5.76    0.89
  -5   2   1    5.75    0.65
  -5   2   1    5.15    0.51
  -5   2   1    4.31    0.81
   5   2  -1    6.17    0.88
  -5   2   1    4.31    0.81
  -4  -2   1    0.13    0.25
  -4  -2   1    0.28    0.20
   4  -2  -1    0.18    0.19
  -4  -2   1   -0.01    0.21
   4  -2  -1   -0.08    0.21
   4  -2  -1   -0.34    0.14
  -4  -2   1   -0.01    0.21
  -4  -2   1    0.04    0.18
  -4  -2   1    0.13    0.25
   4  -2  -1    0.17    0.24
   4  -2  -1   -0.08    0.21
   4   2  -1    0.04    0.26
  -4   2   1    0.21    0.21
  -4   2   1    0.08    0.21
   4   2  -1    0.04    0.26
  -4   2   1    0.13    0.28
   4   2  -1    0.24    0.19
  -4   2   1   -0.01    0.18
   4   2  -1    0.13    0.21
  -4   2   1    0.39    0.34
  -4   2   1    0.21    0.28
  -4   2   1    0.39    0.34
   4   2  -1   -0.15    0.13
   3  -2  -1    9.74    0.60
   3  -2  -1   10.15    0.64
   3  -2  -1    8.84    0.99
   3  -2  -1    8.84    0.99
  -3  -2   1    9.33    0.93
  -3  -2   1    9.33    0.93
  -3  -2   1    8.59    0.46
  -3  -2   1    9.16    0.56
   3  -2  -1    8.74    0.52
  -3  -2   1    9.63    0.57
   3   2  -1    8.89    0.55
   3   2  -1    8.72    0.89
  -3   2   1   10.31    0.62
   3   2  -1    9.44    0.59
   3   2  -1    8.72    0.89
  -3   2   1    7.38    0.92
  -3   2   1    7.38    0.92
   3   2  -1    8.99    0.49
  -3   2   1    8.81    0.55
  -3   2   1    9.59    0.62
  -2  -2   1  130.05    4.13
   2  -2  -1  130.07    4.24
  -2  -2   1  134.13    3.57
   2  -2  -1  130.08    4.23
  -2  -2   1  134.30    3.57
   2  -2  -1  139.20    3.52
   2  -2  -1  134.61    3.66
  -2  -2   1  130.05    4.13
   2  -2  -1  141.66    3.61
  -2   2   1  135.54    4.28
   2   2  -1  134.58    3.57
   2   2  -1  131.10    3.49
   2   2  -1  138.50    4.20
   2   2  -1  133.26    3.58
   2   2  -1  138.50    4.20
  -2   2   1  135.53    4.27
  -2   2   1  135.80    3.61
  -2   2   1  138.55    3.66
  -2   2   1  129.89    3.53
   1  -2  -1   98.76    2.75
  -1  -2   1  101.59    2.76
   1  -2  -1   99.52    3.22
  -1  -2   1  104.18    3.29
  -1  -2   1  104.18    3.29
   1  -2  -1   99.52    3.22
   1  -2  -1   98.67    2.64
   1  -2  -1  101.84    2.72
  -1  -2   1   96.87    2.64
  -1  -2   1  103.40    2.75
   1   2  -1  101.05    2.68
   1   2  -1  102.03    3.29
  -1   2   1   98.59    3.24
  -1   2   1   98.59    3.24
  -1   2   1   99.85    2.75
  -1   2   1   98.46    2.71
   1   2  -1  101.57    2.75
   1   2  -1  101.25    2.76
  -1   2   1  100.35    2.66
   1   2  -1  102.03    3.29
   0  -2  -1    2.71    0.30
   0  -2   1    2.73    0.50
   0  -2  -1    2.46    0.27
   0  -2  -1    1.80    0.38
   0  -2  -1    1.80    0.38
   0  -2   1    2.65    0.33
   0  -2   1    2.75    0.34
   0  -2   1    2.59    0.27
   0  -2   1    2.73    0.50
   0  -2  -1    2.50    0.23
   0   2   1    2.98    0.30
   0   2  -1    2.41    0.47
   0   2  -1    2.27    0.33
   0   2   1    2.24    0.43
   0   2   1    2.69    0.25
   0   2  -1    2.26    0.31
   0   2  -1    2.41    0.47
   0   2   1    2.24    0.43
   0   2   1    2.44    0.29
   0   2  -1    2.66    0.28
   1  -2   1    7.20    0.82
   1  -2   1    5.62    0.45
  -1  -2  -1    6.06    0.52
   1  -2   1    5.95    0.40
  -1  -2  -1    6.06    0.52
   1  -2   1    7.20    0.82
  -1  -2  -1    5.14    0.36
   1  -2   1    5.02    0.48
  -1  -2  -1    5.58    0.36
  -1   2  -1    4.42    0.38
  -1   2  -1    6.02    0.46
   1   2   1    5.75    0.57
   1   2   1    6.17    0.31
  -1   2  -1    5.74    0.74
   1   2   1    5.82    0.33
   1   2   1    5.20    0.35
  -1   2  -1    4.40    0.44
   1   2   1    5.75    0.57
  -1   2  -1    5.74    0.74
   1   2   1    5.46    0.38
  -2  -2  -1    1.79    0.35
  -2  -2  -1    1.62    0.24
   2  -2   1    1.29    0.44
   2  -2   1    2.08    0.34
  -2  -2  -1    2.07    0.26
   2  -2   1    1.29    0.44
   2  -2   1    2.14    0.37
   2  -2   1    2.22    0.30
  -2  -2  -1    1.79    0.35
  -2   2  -1    1.85    0.50
  -2   2  -1    1.85    0.50
  -2   2  -1    1.10    0.29
   2   2   1    1.93    0.26
   2   2   1    2.07    0.39
   2   2   1    2.07    0.39
  -2   2  -1    1.23    0.31
  -2   2  -1    2.01    0.29
   2   2   1    2.02    0.22
   2   2   1    1.74    0.24
   2   2   1    1.79    0.20
  -3  -2  -1    0.17    0.20
   3  -2   1    0.73    0.37
  -3  -2  -1   -0.17    0.18
  -3  -2  -1   -0.17    0.18
   3  -2   1    0.02    0.17
   3  -2   1    0.54    0.23
  -3  -2  -1   -0.04    0.14
   3  -2   1    0.07    0.22
   3  -2   1    0.73    0.37
  -3  -2  -1    0.17    0.20
   3   2   1    0.46    0.26
  -3   2  -1   -0.59    0.17
   3   2   1    0.46    0.26
   3   2   1    0.05    0.14
   3   2   1   -0.16    0.14
   3   2   1    0.16    0.13
  -3   2  -1   -0.59    0.17
  -3   2  -1    0.28    0.20
   3   2   1    0.21    0.14
  -3   2  -1    0.09    0.22
  -3   2  -1    0.29    0.22
   4  -2   1   65.09    2.03
   4  -2   1   68.23    2.17
   4  -2   1   65.80    2.86
   4  -2   1   65.80    2.86
  -4  -2  -1   70.60    2.00
  -4  -2  -1   68.67    2.41
   4  -2   1   62.37    2.21
  -4  -2  -1   68.67    2.41
  -4  -2  -1   67.05    2.40
  -4  -2  -1   67.05    2.41
  -4  -2  -1   70.00    1.97
  -4   2  -1   65.33    2.17
   4   2   1   68.61    1.90
   4   2   1   66.13    1.89
  -4   2  -1   63.44    2.83
   4   2   1   68.85    2.49
   4   2   1   67.86    2.01
  -4   2  -1   63.44    2.83
   4   2   1   66.30    1.97
  -4   2  -1   62.55    2.02
   4   2   1   68.85    2.49
  -4   2  -1   67.80    2.24
  -5  -2  -1    6.02    0.49
  -5  -2  -1    7.64    0.87
   5  -2   1    4.39    0.59
  -5  -2  -1    6.05    0.75
   5  -2   1    5.54    0.52
  -5  -2  -1    6.05    0.75
  -5  -2  -1    5.94    0.48
   5  -2   1    5.89    0.61
  -5  -2  -1    7.64    0.86
   5  -2   1    5.07    0.90
   5  -2   1    5.07    0.90
   5   2   1    5.94    0.79
   5   2   1    5.99    0.47
   5   2   1    5.62    0.42
  -5   2  -1    4.76    0.86
   5   2   1    5.94    0.79
  -5   2  -1    6.19    0.91
   5   2   1    5.31    0.52
  -5   2  -1    5.36    0.63
  -5   2  -1    5.11    0.59
  -5   2  -1    4.76    0.86
  -5   2  -1    6.38    0.57
  -5   2  -1    6.13    0.90
   6  -2   1    0.50    0.36
  -6  -2  -1   -0.03    0.16
  -6  -2  -1    0.00    0.19
  -6  -2  -1   -0.16    0.15
   6  -2   1    0.50    0.36
   6  -2   1    0.17    0.27
   6  -2   1    0.14    0.22
  -6  -2  -1   -0.16    0.15
   6   2   1   -0.06    0.19
  -6   2  -1    0.30    0.34
   6   2   1    0.00    0.17
   6   2   1    0.02    0.24
  -6   2  -1    0.34    0.28
   6   2   1    0.03    0.15
  -6   2  -1    0.12    0.22
   6   2   1    0.02    0.24
  -6   2  -1    0.30    0.34
   7  -2   1    2.22    0.40
  -7  -2  -1    2.80    0.43
   7  -2   1    2.45    0.54
   7  -2   1    2.52    0.68
  -7  -2  -1    2.49    0.57
  -7  -2  -1    2.49    0.57
  -7  -2  -1    2.09    0.40
   7  -2   1    2.52    0.68
   7   2   1    2.47    0.36
   7   2   1    2.22    0.58
  -7   2  -1    2.77    0.44
   7   2   1    3.81    0.53
   7   2   1    2.16    0.55
  -7   2  -1    3.21    0.80
   7   2   1    2.16    0.55
   7   2   1    2.22    0.58
  -7   2  -1    2.10    0.47
  -7   2  -1    3.21    0.80
   7   2   1    2.61    0.37
  -8  -2  -1    4.62    0.83
   8  -2   1    3.23    0.81
  -8  -2  -1    6.23    0.67
  -8  -2  -1    4.62    0.83
   8  -2   1    5.37    0.76
   8  -2   1    3.23    0.81
   8  -2   1    3.98    0.55
   8   2   1    5.29    0.54
   8   2   1    4.45    0.50
   8   2   1    4.81    0.86
  -8   2  -1    5.55    0.73
   8   2   1    4.14    0.83
  -8   2  -1    5.06    1.01
  -8   2  -1    5.06    1.01
   8   2   1    4.14    0.83
  -8   2  -1    5.35    0.61
   8   2   1    5.61    0.67
   8   2   1    4.81    0.86
   9  -2   1    8.01    0.97
  -9  -2  -1    9.78    0.78
  -9  -2  -1    9.90    1.27
  -9  -2  -1    9.90    1.27
   9  -2   1   11.79    1.67
   9  -2   1   11.79    1.67
   9  -2   1   10.83    0.82
  -9   2  -1    9.76    1.03
   9   2   1    9.37    0.68
   9   2   1   10.13    1.35
  -9   2  -1    9.96    0.76
  -9   2  -1   10.67    1.60
   9   2   1    9.22    0.70
   9   2   1   10.97    1.44
  -9   2  -1   10.67    1.60
   9   2   1   10.39    0.85
   9   2   1   10.13    1.35
   9   2   1   10.97    1.44
  10  -2   1   13.51    1.33
  10  -2   1   12.12    1.77
  10  -2   1   12.12    1.77
  10  -2   1   13.42    0.96
 -10  -2  -1   13.84    1.61
 -10  -2  -1   11.41    0.90
 -10  -2  -1   13.84    1.61
 -10   2  -1   14.02    1.83
  10   2   1   12.18    1.58
  10   2   1   12.26    1.58
  10   2   1   13.95    1.04
 -10   2  -1   14.02    1.83
  10   2   1   12.26    1.58
 -10   2  -1   14.10    0.96
  10   2   1   13.47    0.88
 -10   2  -1   14.26    1.30
  10   2   1   12.18    1.58
  11  -2   1    4.15    0.80
  11  -2   1    4.04    0.66
 -11  -2  -1    4.52    0.70
  11   2   1    4.33    0.74
  11   2   1    3.09    0.55
  11   2   1    3.80    0.94
  11   2   1    3.80    0.94
  11   2   1    3.30    0.89
 -11   2  -1    2.62    0.86
  11   2   1    3.30    0.90
 -11   2  -1    4.03    0.75
 -11   2  -1    2.62    0.86
  12  -2   1    0.74    0.48
  12  -2   1    1.04    0.44
 -12  -2  -1    0.15    0.38
  12   2   1    1.43    0.63
  12   2   1    0.85    0.49
  12   2   1    1.43    0.63
 -12   2  -1    1.14    0.53
  12   2   1    0.47    0.33
 -13  -2  -1    1.01    0.55
  13  -2   1    1.71    0.56
  13  -2   1    0.96    0.53
  13   2   1    1.51    0.48
  13   2   1    1.40    0.63
 -13   2  -1    1.86    0.66
  13   2   1    1.37    0.63
  13   2   1    1.90    0.62
  14  -2   1    0.71    0.56
 -14  -2  -1    1.26    0.60
  14  -2   1    0.85    0.53
 -14   2  -1    1.20    0.64
  14   2   1    2.63    0.71
  14   2   1    1.15    0.46
  14   2   1    1.50    0.72
  14   2   1    1.51    0.73
 -15  -2  -1    0.38    0.56
  15  -2   1    0.13    0.55
  15  -2   1    0.40    0.49
 -15   2  -1    0.25    0.62
  15   2   1    0.49    0.53
  15   2   1    0.04    0.41
  15   2   1    0.51    0.45
  16  -2   1    7.81    1.14
  16  -2   1    6.11    1.20
  16   2   1    6.62    0.97
 -16   2  -1    8.96    1.36
  17  -2   1    0.17    0.58
  17  -2   1    0.65    0.72
  17   2   1    1.59    0.63
 -17   2  -1    0.92    0.83
  18  -2   1    1.06    0.71
  18   2   1    1.66    0.67
  19  -2   1   -0.04    0.61
  19   2   1    0.25    0.57
  19  -3  -1    1.42    0.89
  19  -3  -1    0.51    0.77
  19   3  -1    1.85    0.73
 -19   3   1    0.38    0.81
  18  -3  -1    1.60    0.83
  18  -3  -1    1.16    0.85
 -18   3   1    3.36    1.09
  18   3  -1    4.25    0.91
  17  -3  -1   12.21    1.46
  17  -3  -1    7.05    1.37
  17   3  -1    7.21    1.68
 -17   3   1   10.24    1.51
  17   3  -1    7.17    1.68
  17   3  -1    8.17    1.10
  16  -3  -1    6.90    1.29
  16  -3  -1    6.45    1.08
 -16  -3   1    6.99    1.15
  16   3  -1    7.11    1.00
  16   3  -1    8.54    1.75
  16   3  -1    7.39    1.19
 -16   3   1    8.36    1.34
  16   3  -1    8.54    1.74
  15  -3  -1   -0.15    0.51
  15  -3  -1   -0.12    0.48
 -15  -3   1    0.10    0.51
  15   3  -1    0.13    0.47
  15   3  -1    0.08    0.39
  15   3  -1   -0.18    0.44
  15   3  -1    0.13    0.47
 -15   3   1    0.40    0.61
  14  -3  -1    5.43    0.90
 -14  -3   1    3.73    0.77
  14  -3  -1    7.46    1.22
  14   3  -1    3.66    1.17
  14   3  -1    5.67    0.95
 -14   3   1    3.54    0.90
  14   3  -1    3.66    1.17
  14   3  -1    5.49    0.83
  13  -3  -1   19.70    1.88
  13  -3  -1   17.39    1.33
 -13  -3   1   17.13    1.29
  13   3  -1   13.85    1.41
 -13   3   1   16.53    1.63
  13   3  -1   12.31    1.82
  13   3  -1   12.31    1.82
  13   3  -1   17.68    1.17
  12  -3  -1    3.25    0.67
  12  -3  -1    3.67    0.88
 -12  -3   1    2.82    0.66
 -12   3   1    2.21    0.93
 -12   3   1    2.21    0.93
  12   3  -1    2.29    0.79
 -12   3   1    3.20    0.77
  12   3  -1    2.29    0.79
  12   3  -1    2.51    0.53
  12   3  -1    2.95    0.68
  11  -3  -1    0.42    0.39
  11  -3  -1    1.16    0.61
  11  -3  -1    0.47    0.45
 -11  -3   1    0.95    0.52
  11  -3  -1    1.16    0.61
 -11  -3   1    0.72    0.42
 -11  -3   1    0.95    0.52
  11   3  -1    0.68    0.47
 -11   3   1    0.31    0.42
  11   3  -1    0.87    0.43
  11   3  -1    0.68    0.47
 -11   3   1   -0.22    0.32
  11   3  -1    1.17    0.38
 -11   3   1    0.80    0.46
 -11   3   1    0.31    0.42
 -10  -3   1    0.20    0.28
  10  -3  -1    0.03    0.31
 -10  -3   1    0.59    0.38
  10  -3  -1   -0.07    0.27
  10  -3  -1   -0.07    0.27
 -10  -3   1    0.20    0.27
  10  -3  -1   -0.42    0.27
  10   3  -1    0.40    0.36
 -10   3   1    0.36    0.38
 -10   3   1    0.20    0.37
 -10   3   1    0.24    0.33
  10   3  -1    0.44    0.30
  10   3  -1   -0.24    0.24
 -10   3   1    0.20    0.37
  10   3  -1   -0.24    0.24
  -9  -3   1   11.51    0.87
  -9  -3   1   10.06    1.40
   9  -3  -1   10.61    1.62
   9  -3  -1    9.23    0.89
   9  -3  -1   10.61    1.62
  -9  -3   1   10.06    1.40
   9  -3  -1    8.55    1.06
   9   3  -1    9.98    1.44
  -9   3   1   11.93    1.77
  -9   3   1   10.96    0.96
  -9   3   1    8.35    1.00
   9   3  -1   10.20    0.76
  -9   3   1   11.93    1.77
   9   3  -1    9.98    1.44
   9   3  -1   10.53    1.01
  -8  -3   1   12.57    0.89
   8  -3  -1   14.03    1.11
  -8  -3   1   13.50    1.49
   8  -3  -1   12.71    0.89
  -8  -3   1   13.50    1.49
   8  -3  -1   16.85    1.99
   8  -3  -1   16.85    1.99
  -8   3   1   13.59    1.77
  -8   3   1   12.63    0.90
   8   3  -1   11.54    1.44
   8   3  -1   13.36    0.94
   8   3  -1   12.64    0.81
  -8   3   1   15.57    1.08
   8   3  -1   11.54    1.44
  -8   3   1   13.59    1.77
  -7  -3   1   24.95    1.66
   7  -3  -1   23.98    1.39
  -7  -3   1   21.46    0.96
   7  -3  -1   21.02    1.11
  -7  -3   1   21.88    1.13
   7  -3  -1   26.36    1.96
  -7  -3   1   24.94    1.66
   7  -3  -1   26.36    1.96
  -7   3   1   22.13    1.14
  -7   3   1   20.63    1.24
   7   3  -1   23.38    1.23
   7   3  -1   23.09    1.67
   7   3  -1   23.09    1.67
   7   3  -1   22.08    1.02
  -7   3   1   22.69    1.85
  -7   3   1   22.69    1.85
   6  -3  -1    3.58    0.48
  -6  -3   1    4.69    0.58
  -6  -3   1    3.56    0.40
  -6  -3   1    2.85    0.64
   6  -3  -1    4.23    0.90
   6  -3  -1    3.55    0.61
  -6  -3   1    2.85    0.64
   6  -3  -1    4.23    0.90
  -6  -3   1    3.63    0.50
  -6   3   1    3.64    0.87
  -6   3   1    3.97    0.52
   6   3  -1    3.09    0.41
   6   3  -1    3.44    0.53
  -6   3   1    3.64    0.87
  -6   3   1    3.05    0.73
  -6   3   1    3.21    0.55
   6   3  -1    3.72    0.50
   6   3  -1    4.08    0.81
   6   3  -1    4.08    0.81
  -6   3   1    3.01    0.73
  -5  -3   1   36.04    1.92
   5  -3  -1   37.01    1.63
   5  -3  -1   33.79    1.36
  -5  -3   1   36.03    1.92
   5  -3  -1   35.09    2.16
  -5  -3   1   37.16    1.44
   5  -3  -1   35.10    2.15
  -5   3   1   36.81    2.20
  -5   3   1   36.81    2.20
   5   3  -1   37.72    1.44
  -5   3   1   37.01    1.42
   5   3  -1   34.44    1.43
   5   3  -1   33.89    1.28
  -5   3   1   37.29    1.56
   5   3  -1   35.48    1.94
   5   3  -1   35.47    1.94
   4  -3  -1  107.42    3.08
  -4  -3   1  107.92    3.84
  -4  -3   1  104.36    3.11
  -4  -3   1  112.02    3.16
   4  -3  -1  106.02    4.12
   4  -3  -1  111.98    3.25
  -4  -3   1  107.92    3.84
   4  -3  -1  106.01    4.13
  -4  -3   1  104.96    2.95
   4  -3  -1  108.68    3.35
  -4   3   1  105.99    3.25
  -4   3   1  107.55    3.12
   4   3  -1  103.87    3.15
  -4   3   1   98.39    4.06
   4   3  -1  113.64    3.16
  -4   3   1  112.54    3.35
  -4   3   1   98.39    4.06
   4   3  -1  111.32    3.93
   4   3  -1  108.73    3.02
   4   3  -1  111.31    3.93
   3  -3  -1    1.60    0.52
  -3  -3   1    1.23    0.41
  -3  -3   1    0.86    0.28
  -3  -3   1    1.11    0.29
   3  -3  -1    1.39    0.33
   3  -3  -1    1.60    0.52
  -3  -3   1    1.27    0.23
  -3  -3   1    1.23    0.41
   3  -3  -1    1.54    0.35
   3  -3  -1    1.27    0.28
   3   3  -1    0.79    0.38
  -3   3   1    2.02    0.34
  -3   3   1    1.59    0.37
   3   3  -1    1.26    0.31
  -3   3   1    1.08    0.31
  -3   3   1    1.54    0.51
   3   3  -1    1.37    0.26
   3   3  -1    0.79    0.38
  -3   3   1    1.54    0.51
   3   3  -1    1.38    0.31
  -2  -3   1   43.93    2.01
   2  -3  -1   44.02    1.61
  -2  -3   1   45.97    1.55
  -2  -3   1   44.10    1.52
   2  -3  -1   42.24    1.52
   2  -3  -1   43.08    2.06
  -2  -3   1   44.37    1.38
  -2  -3   1   43.93    2.01
   2  -3  -1   43.08    2.06
   2  -3  -1   44.32    1.42
   2   3  -1   43.19    2.03
  -2   3   1   42.56    1.44
  -2   3   1   41.56    1.53
  -2   3   1   40.49    2.06
   2   3  -1   41.63    1.51
  -2   3   1   40.49    2.06
   2   3  -1   43.19    2.03
   2   3  -1   44.06    1.53
   2   3  -1   44.40    1.41
  -2   3   1   44.45    1.60
   1  -3  -1   11.42    1.11
   1  -3  -1   11.42    1.11
   1  -3  -1    9.95    0.67
  -1  -3   1   12.71    1.01
  -1  -3   1   12.50    0.70
  -1  -3   1   11.42    0.60
   1  -3  -1   12.05    0.68
   1  -3  -1   11.99    0.58
  -1  -3   1   11.89    0.70
  -1  -3   1   12.71    1.01
   1   3  -1   11.96    0.62
  -1   3   1   12.27    0.62
  -1   3   1   12.29    1.18
   1   3  -1   12.99    1.04
  -1   3   1   12.29    1.18
  -1   3   1   11.56    0.71
   1   3  -1   10.65    0.68
   1   3  -1   11.75    0.69
   1   3  -1   12.99    1.03
  -1   3   1   10.32    0.64
   0  -3  -1   38.31    1.36
   0  -3  -1   38.12    1.76
   0  -3   1   37.52    1.39
   0  -3  -1   37.49    1.20
   0  -3   1   38.17    1.27
   0  -3  -1   38.53    1.32
   0  -3   1   39.94    1.45
   0  -3  -1   38.12    1.76
   0  -3   1   40.03    1.93
   0  -3   1   40.03    1.93
   0   3   1   37.54    1.23
   0   3  -1   38.06    1.43
   0   3   1   38.15    1.36
   0   3   1   41.69    1.83
   0   3  -1   37.79    1.91
   0   3  -1   40.38    1.43
   0   3   1   36.57    1.31
   0   3  -1   37.60    1.30
   0   3   1   41.69    1.83
   0   3  -1   37.79    1.91
  -1  -3  -1    3.38    0.55
   1  -3   1    4.22    0.75
   1  -3   1    4.22    0.75
  -1  -3  -1    3.38    0.55
  -1  -3  -1    4.27    0.42
   1  -3   1    4.00    0.40
   1  -3   1    3.30    0.44
  -1  -3  -1    3.73    0.40
   1  -3   1    3.55    0.48
   1   3   1    4.36    0.42
  -1   3  -1    4.16    0.74
   1   3   1    3.55    0.59
   1   3   1    3.82    0.42
  -1   3  -1    2.53    0.41
  -1   3  -1    3.73    0.46
  -1   3  -1    3.42    0.38
   1   3   1    4.39    0.36
  -1   3  -1    4.16    0.74
   1   3   1    3.55    0.58
   2  -3   1   35.66    1.27
   2  -3   1   33.82    1.90
  -2  -3  -1   36.04    1.24
   2  -3   1   37.67    1.48
  -2  -3  -1   36.89    1.25
   2  -3   1   38.13    1.42
  -2  -3  -1   36.13    1.62
  -2  -3  -1   36.13    1.62
   2  -3   1   33.82    1.91
   2   3   1   37.51    1.26
   2   3   1   36.99    1.17
   2   3   1   35.06    1.64
  -2   3  -1   35.51    1.41
  -2   3  -1   36.08    1.30
   2   3   1   35.06    1.64
  -2   3  -1   35.76    1.97
  -2   3  -1   37.43    1.48
  -2   3  -1   35.76    1.97
   2   3   1   34.81    1.13
   2   3   1   37.36    1.26
   3  -3   1    8.13    0.77
   3  -3   1    6.07    0.54
  -3  -3  -1    7.67    0.82
   3  -3   1    5.37    0.57
   3  -3   1    6.98    0.99
  -3  -3  -1    7.67    0.82
  -3  -3  -1    7.25    0.50
  -3  -3  -1    6.85    0.48
   3  -3   1    6.98    0.99
  -3   3  -1    7.83    1.10
   3   3   1    8.77    0.90
   3   3   1    7.74    0.46
   3   3   1    8.77    0.90
  -3   3  -1    7.83    1.10
   3   3   1    7.55    0.51
   3   3   1    7.12    0.49
  -3   3  -1    7.47    0.58
  -3   3  -1    6.69    0.67
   3   3   1    7.82    0.44
  -3   3  -1    5.69    0.63
   4  -3   1    4.10    0.58
  -4  -3  -1    5.84    0.74
  -4  -3  -1    4.68    0.46
   4  -3   1    4.21    0.84
   4  -3   1    4.21    0.84
  -4  -3  -1    5.84    0.74
   4  -3   1    3.67    0.45
   4   3   1    4.46    0.47
  -4   3  -1    3.42    0.79
   4   3   1    4.12    0.35
   4   3   1    3.99    0.38
  -4   3  -1    2.68    0.48
   4   3   1    4.18    0.44
  -4   3  -1    3.42    0.79
  -4   3  -1    4.37    0.49
   4   3   1    4.64    0.70
   4   3   1    4.64    0.70
  -5  -3  -1    5.78    0.55
   5  -3   1    5.48    0.57
   5  -3   1    6.14    0.75
   5  -3   1    8.15    1.22
  -5  -3  -1    7.13    0.85
  -5  -3  -1    6.14    0.55
   5  -3   1    8.16    1.22
  -5  -3  -1    7.13    0.85
   5   3   1    6.08    0.83
   5   3   1    5.38    0.52
  -5   3  -1    5.84    1.04
   5   3   1    5.52    0.46
   5   3   1    6.67    0.59
  -5   3  -1    6.46    0.73
  -5   3  -1    5.84    1.04
   5   3   1    5.38    0.42
   5   3   1    6.08    0.83
  -5   3  -1    5.77    0.59
   6  -3   1   21.37    1.70
  -6  -3  -1   21.14    1.32
  -6  -3  -1   19.42    0.95
   6  -3   1   15.18    1.10
   6  -3   1   18.62    0.99
  -6  -3  -1   21.14    1.32
   6  -3   1   21.38    1.70
  -6  -3  -1   19.39    0.94
  -6   3  -1   18.16    1.11
   6   3   1   16.07    1.25
  -6   3  -1   19.05    1.00
  -6   3  -1   19.30    1.99
   6   3   1   19.74    0.85
   6   3   1   19.57    0.87
   6   3   1   16.07    1.25
  -6   3  -1   19.30    1.99
   6   3   1   20.49    1.00
   6   3   1   20.16    0.95
   7  -3   1    1.42    0.45
   7  -3   1    0.22    0.30
   7  -3   1    0.22    0.30
  -7  -3  -1    1.40    0.34
  -7  -3  -1    0.43    0.27
   7  -3   1    1.73    0.41
  -7  -3  -1    0.43    0.27
  -7  -3  -1    1.15    0.32
   7   3   1    1.13    0.45
   7   3   1    1.06    0.29
   7   3   1    0.77    0.28
  -7   3  -1    1.06    0.51
  -7   3  -1    1.06    0.51
   7   3   1    1.13    0.45
  -7   3  -1    1.40    0.44
   7   3   1    0.46    0.28
   7   3   1    1.33    0.28
  -7   3  -1    0.64    0.30
   8  -3   1    0.90    0.45
  -8  -3  -1    0.92    0.34
   8  -3   1    0.90    0.45
   8  -3   1    0.98    0.44
  -8  -3  -1    0.54    0.28
   8  -3   1    0.37    0.29
  -8  -3  -1    0.92    0.35
   8   3   1    0.33    0.27
   8   3   1    0.38    0.19
   8   3   1    0.48    0.37
   8   3   1    0.48    0.37
  -8   3  -1    0.90    0.42
  -8   3  -1    0.42    0.38
  -8   3  -1    0.42    0.38
  -8   3  -1    0.65    0.33
   8   3   1    0.48    0.24
   9  -3   1    4.52    0.65
  -9  -3  -1    3.51    0.76
  -9  -3  -1    4.99    0.64
   9  -3   1    3.96    0.74
   9  -3   1    4.61    1.04
  -9  -3  -1    3.51    0.76
   9  -3   1    4.61    1.04
  -9   3  -1    2.96    0.53
   9   3   1    5.14    0.98
   9   3   1    4.12    0.52
  -9   3  -1    5.30    1.18
   9   3   1    5.14    0.98
   9   3   1    5.01    0.68
  -9   3  -1    5.30    1.18
  -9   3  -1    3.83    0.70
   9   3   1    5.33    0.58
 -10  -3  -1    0.15    0.33
 -10  -3  -1    0.19    0.23
  10  -3   1   -0.08    0.26
  10  -3   1   -0.56    0.26
  10  -3   1   -0.08    0.26
  10  -3   1    0.44    0.35
 -10  -3  -1    0.19    0.23
 -10   3  -1    0.21    0.35
 -10   3  -1    0.59    0.44
 -10   3  -1    0.74    0.54
  10   3   1    0.30    0.27
 -10   3  -1    0.74    0.54
  10   3   1    0.97    0.41
  10   3   1    0.34    0.32
  10   3   1    0.34    0.32
 -11  -3  -1    0.25    0.35
  11  -3   1   -0.02    0.40
  11  -3   1    0.03    0.32
 -11   3  -1    0.15    0.40
 -11   3  -1   -0.09    0.26
  11   3   1   -0.25    0.28
  11   3   1    0.59    0.46
 -11   3  -1   -0.09    0.26
  11   3   1    0.08    0.27
  11   3   1    0.59    0.46
  12  -3   1    9.36    1.04
 -12  -3  -1   11.19    1.09
  12  -3   1   11.27    1.37
  12   3   1   13.32    1.81
  12   3   1   10.69    1.15
  12   3   1   12.67    0.97
  12   3   1   13.32    1.81
 -12   3  -1   10.08    1.26
  13  -3   1    0.09    0.41
 -13  -3  -1    0.41    0.43
  13  -3   1    0.10    0.45
  13   3   1    0.18    0.33
 -13   3  -1    0.00    0.48
  13   3   1   -0.10    0.31
  13   3   1    0.70    0.48
  13   3   1    0.18    0.33
  14  -3   1   14.26    1.63
  14  -3   1   14.59    1.41
 -14  -3  -1   14.61    1.39
  14   3   1   16.78    1.20
  14   3   1   15.91    1.52
  14   3   1   12.67    1.90
 -14   3  -1   12.40    1.47
  14   3   1   12.67    1.90
  15  -3   1    0.42    0.54
  15  -3   1    0.59    0.62
 -15   3  -1    0.36    0.67
  15   3   1   -0.41    0.33
  15   3   1   -0.35    0.33
  15   3   1    0.00    0.36
  16  -3   1    0.61    0.72
  16  -3   1    0.60    0.58
  16   3   1   -0.18    0.37
  16   3   1    0.72    0.50
 -16   3  -1    0.67    0.78
  17  -3   1    1.60    0.76
  17  -3   1    1.80    0.91
 -17   3  -1    1.48    0.92
  17   3   1    1.77    0.61
  18  -3   1    0.36    0.71
  18   3   1   -0.15    0.50
  19  -3   1    1.96    0.88
  19   3   1    0.85    0.60
  19  -4  -1    1.74    0.90
  19  -4  -1    3.16    1.14
 -19   4   1    2.21    1.10
  19   4  -1    2.96    0.83
  18  -4  -1    5.85    1.17
  18  -4  -1    3.69    1.13
  18   4  -1    5.75    0.99
 -18   4   1    4.79    1.24
  17  -4  -1    8.08    1.48
  17  -4  -1   10.67    1.42
 -17   4   1    7.65    1.41
  17   4  -1    8.27    1.82
  17   4  -1    8.27    1.82
  17   4  -1    5.10    0.91
 -16  -4   1    4.56    0.96
  16  -4  -1    5.05    1.00
  16  -4  -1    3.64    1.03
  16   4  -1    2.67    0.80
  16   4  -1    4.19    0.82
  16   4  -1    1.72    0.90
  16   4  -1    1.72    0.90
 -16   4   1    4.80    1.09
 -15  -4   1    9.04    1.18
  15  -4  -1   10.35    1.53
  15  -4  -1    9.44    1.22
  15   4  -1    9.84    1.10
  15   4  -1   10.48    1.33
  15   4  -1    9.26    1.74
 -15   4   1    9.38    1.44
  15   4  -1    9.26    1.75
  14  -4  -1    0.31    0.53
 -14  -4   1    0.30    0.49
  14  -4  -1    1.09    0.67
  14   4  -1    1.17    0.66
  14   4  -1    0.61    0.49
 -14   4   1    1.60    0.72
  14   4  -1    0.75    0.45
  14   4  -1    1.17    0.66
 -13  -4   1   11.79    1.23
  13  -4  -1   12.29    1.28
  13  -4  -1   11.11    1.45
  13   4  -1   10.75    1.07
 -13   4   1   12.03    1.43
  13   4  -1   15.87    2.14
  13   4  -1   15.88    2.14
  13   4  -1   12.70    1.32
  12  -4  -1   18.80    1.85
  12  -4  -1   22.23    1.44
 -12  -4   1   21.01    1.38
 -12   4   1   21.59    1.63
  12   4  -1   21.35    2.41
  12   4  -1   21.14    1.46
  12   4  -1   21.35    2.41
 -12   4   1   22.50    2.81
  12   4  -1   18.49    1.22
 -12   4   1   22.50    2.81
  11  -4  -1    6.78    1.49
  11  -4  -1    6.78    1.49
 -11  -4   1    5.75    0.80
  11  -4  -1    4.83    0.77
  11  -4  -1    4.58    0.90
  11   4  -1    4.78    1.10
  11   4  -1    5.59    0.70
 -11   4   1    5.70    1.38
  11   4  -1    4.78    1.10
 -11   4   1    3.95    0.80
 -11   4   1    5.70    1.38
  11   4  -1    4.74    0.77
 -11   4   1    6.08    0.86
 -10  -4   1    3.58    0.86
  10  -4  -1    3.12    0.62
  10  -4  -1    1.90    0.74
 -10  -4   1    3.58    0.86
  10  -4  -1    1.90    0.74
 -10  -4   1    3.28    0.62
  10  -4  -1    3.23    0.73
  10   4  -1    5.66    1.16
 -10   4   1    2.61    0.64
  10   4  -1    3.36    0.63
 -10   4   1    2.95    0.98
  10   4  -1    3.79    0.57
 -10   4   1    2.95    0.98
 -10   4   1    3.63    0.66
  10   4  -1    5.66    1.16
   9  -4  -1    0.59    0.44
   9  -4  -1    0.71    0.39
   9  -4  -1    1.79    0.58
  -9  -4   1    1.16    0.46
  -9  -4   1    1.11    0.41
   9  -4  -1    0.59    0.44
  -9  -4   1    1.16    0.46
  -9   4   1    0.92    0.47
  -9   4   1    1.24    0.63
   9   4  -1    0.99    0.32
  -9   4   1    1.99    0.51
   9   4  -1    1.40    0.54
   9   4  -1    1.55    0.48
   9   4  -1    1.40    0.54
  -9   4   1    1.24    0.64
   8  -4  -1    0.15    0.33
   8  -4  -1   -0.29    0.25
   8  -4  -1    0.42    0.39
  -8  -4   1   -0.17    0.25
  -8  -4   1    0.16    0.27
  -8  -4   1    0.16    0.27
   8  -4  -1    0.15    0.32
  -8   4   1    0.10    0.34
  -8   4   1    0.10    0.34
  -8   4   1   -0.19    0.25
   8   4  -1    0.05    0.21
   8   4  -1    0.43    0.31
   8   4  -1    0.43    0.31
   8   4  -1   -0.01    0.24
  -8   4   1    0.46    0.34
   7  -4  -1   59.55    2.48
  -7  -4   1   54.21    2.09
   7  -4  -1   61.53    3.35
   7  -4  -1   61.53    3.35
   7  -4  -1   56.83    2.11
  -7  -4   1   57.56    2.82
  -7  -4   1   57.56    2.82
  -7   4   1   53.25    3.19
   7   4  -1   57.66    1.99
  -7   4   1   53.25    3.19
   7   4  -1   57.50    2.20
   7   4  -1   56.79    2.92
   7   4  -1   56.79    2.92
  -7   4   1   58.84    2.16
  -7   4   1   56.51    2.34
   6  -4  -1   28.36    2.10
   6  -4  -1   28.36    2.10
   6  -4  -1   27.11    1.50
   6  -4  -1   26.67    1.25
   6   4  -1   24.95    1.75
   6   4  -1   24.95    1.75
  -6   4   1   27.65    2.10
   6   4  -1   26.03    1.29
  -6   4   1   27.65    2.10
  -6   4   1   25.38    1.25
   6   4  -1   26.82    1.15
  -6   4   1   25.27    1.39
   5  -4  -1   53.67    2.93
   5  -4  -1   54.15    2.23
  -5  -4   1   57.08    2.02
   5  -4  -1   54.22    1.93
   5  -4  -1   53.66    2.93
  -5  -4   1   55.37    1.99
  -5  -4   1   56.28    1.79
   5   4  -1   57.66    2.75
  -5   4   1   54.87    3.00
  -5   4   1   55.39    2.16
   5   4  -1   53.24    1.98
   5   4  -1   61.09    1.90
   5   4  -1   57.66    2.75
  -5   4   1   56.47    1.99
  -5   4   1   54.86    3.00
   5   4  -1   53.46    2.02
  -4  -4   1    6.41    0.65
   4  -4  -1    5.83    1.04
   4  -4  -1    5.75    0.57
  -4  -4   1    6.56    0.66
  -4  -4   1    6.11    0.47
   4  -4  -1    5.83    1.04
   4  -4  -1    4.94    0.67
   4   4  -1    8.22    1.11
   4   4  -1    6.21    0.66
   4   4  -1    8.22    1.11
   4   4  -1    5.53    0.61
  -4   4   1    4.03    0.90
  -4   4   1    5.25    0.57
   4   4  -1    5.94    0.54
  -4   4   1    4.56    0.61
  -4   4   1    4.03    0.90
   3  -4  -1   21.39    1.56
   3  -4  -1   18.05    1.07
  -3  -4   1   21.00    1.03
  -3  -4   1   19.56    1.41
   3  -4  -1   20.40    0.94
  -3  -4   1   19.34    0.84
  -3  -4   1   19.56    1.41
  -3  -4   1   19.67    1.02
   3  -4  -1   21.39    1.56
  -3   4   1   15.09    1.60
   3   4  -1   19.39    1.02
   3   4  -1   19.84    0.89
  -3   4   1   19.47    0.95
  -3   4   1   19.47    1.05
  -3   4   1   15.09    1.60
   3   4  -1   19.97    1.45
   3   4  -1   18.68    1.00
   3   4  -1   19.97    1.45
  -2  -4   1   14.74    1.24
   2  -4  -1   15.19    1.51
   2  -4  -1   14.03    0.84
  -2  -4   1   16.08    0.73
   2  -4  -1   15.18    1.51
  -2  -4   1   13.28    0.83
   2  -4  -1   14.92    0.91
   2  -4  -1   14.81    0.77
  -2  -4   1   14.74    1.24
  -2  -4   1   14.71    0.85
   2   4  -1   14.62    1.49
   2   4  -1   12.80    0.73
  -2   4   1   14.63    0.79
   2   4  -1   15.29    0.87
   2   4  -1   14.30    0.85
  -2   4   1   14.89    0.91
  -2   4   1   11.67    1.31
  -2   4   1   13.55    0.84
  -2   4   1   11.67    1.31
   2   4  -1   14.62    1.49
   1  -4  -1    5.32    0.56
  -1  -4   1    4.94    0.47
   1  -4  -1    5.09    0.87
   1  -4  -1    6.01    0.63
  -1  -4   1    6.08    0.95
   1  -4  -1    5.30    0.47
  -1  -4   1    5.02    0.58
   1  -4  -1    5.09    0.87
  -1  -4   1    6.08    0.95
  -1  -4   1    6.45    0.63
  -1   4   1    5.72    0.51
   1   4  -1    6.76    0.67
   1   4  -1    6.42    0.55
   1   4  -1    5.09    0.87
   1   4  -1    5.09    0.87
  -1   4   1    6.75    1.00
   1   4  -1    5.29    0.58
  -1   4   1    5.31    0.60
  -1   4   1    6.75    1.00
  -1   4   1    5.17    0.57
   0  -4   1   31.07    1.85
   0  -4  -1   30.32    1.23
   0  -4  -1   30.55    1.09
   0  -4  -1   32.37    1.76
   0  -4   1   31.06    1.85
   0  -4   1   28.70    1.28
   0  -4   1   28.90    1.32
   0  -4  -1   32.37    1.76
   0  -4  -1   28.96    1.26
   0  -4   1   31.45    1.16
   0   4  -1   30.79    1.20
   0   4   1   30.52    1.15
   0   4  -1   29.54    1.84
   0   4   1   29.18    1.72
   0   4   1   29.18    1.72
   0   4   1   30.66    1.25
   0   4  -1   29.57    1.30
   0   4  -1   29.54    1.84
   0   4   1   31.64    1.30
   0   4  -1   28.78    1.32
  -1  -4  -1    0.65    0.26
  -1  -4  -1    0.23    0.29
   1  -4   1    1.54    0.52
   1  -4   1    0.62    0.24
  -1  -4  -1    0.80    0.27
   1  -4   1    1.54    0.52
  -1  -4  -1    0.66    0.20
   1  -4   1    0.79    0.30
  -1  -4  -1    0.23    0.29
   1  -4   1    0.77    0.32
   1   4   1    0.73    0.26
   1   4   1    0.96    0.40
  -1   4  -1    0.90    0.46
  -1   4  -1    0.90    0.46
   1   4   1    0.96    0.40
  -1   4  -1    0.47    0.28
  -1   4  -1    0.64    0.29
   1   4   1    0.90    0.24
  -1   4  -1    0.77    0.27
   1   4   1    0.72    0.27
   2  -4   1   65.54    3.05
   2  -4   1   67.35    2.12
  -2  -4  -1   67.26    2.11
  -2  -4  -1   67.25    2.13
   2  -4   1   63.39    2.34
  -2  -4  -1   65.28    2.67
   2  -4   1   65.54    3.05
  -2  -4  -1   65.28    2.68
   2   4   1   68.76    2.78
   2   4   1   66.28    2.14
  -2   4  -1   70.91    3.17
  -2   4  -1   63.99    2.30
   2   4   1   66.09    2.00
   2   4   1   68.76    2.78
  -2   4  -1   67.72    2.16
  -2   4  -1   70.90    3.17
   2   4   1   66.15    2.12
   3  -4   1    1.04    0.39
   3  -4   1    0.98    0.31
  -3  -4  -1    2.33    0.38
  -3  -4  -1    1.70    0.34
   3  -4   1    1.36    0.52
  -3  -4  -1    1.34    0.44
  -3  -4  -1    1.34    0.44
   3  -4   1    1.36    0.52
   3   4   1    1.72    0.50
  -3   4  -1    1.75    0.37
   3   4   1    1.60    0.29
   3   4   1    1.46    0.32
   3   4   1    1.84    0.34
   3   4   1    2.07    0.29
  -3   4  -1    1.85    0.42
   3   4   1    1.72    0.50
  -3   4  -1    2.71    0.73
  -3   4  -1    2.71    0.73
   4  -4   1    8.68    0.89
   4  -4   1    9.55    1.34
  -4  -4  -1    8.51    0.60
   4  -4   1    7.86    0.64
   4  -4   1    9.55    1.34
  -4  -4  -1    8.93    0.62
  -4   4  -1   10.22    1.43
  -4   4  -1    8.00    0.82
   4   4   1    7.06    0.95
   4   4   1    7.06    0.95
  -4   4  -1    8.26    0.69
   4   4   1    8.13    0.54
   4   4   1    8.60    0.52
   4   4   1    7.90    0.60
  -4   4  -1   10.22    1.43
   4   4   1    8.09    0.60
  -5  -4  -1    5.90    0.60
   5  -4   1    4.31    0.70
   5  -4   1    5.68    0.62
   5  -4   1    6.03    1.07
   5  -4   1    6.03    1.07
   5   4   1    6.39    0.46
   5   4   1    6.33    0.62
   5   4   1    7.24    0.57
  -5   4  -1    5.92    0.75
   5   4   1    5.11    0.49
   5   4   1    5.75    0.87
   5   4   1    5.75    0.87
  -5   4  -1    4.57    1.02
  -5   4  -1    5.53    0.63
  -5   4  -1    4.57    1.02
   6  -4   1    3.27    0.52
  -6  -4  -1    5.46    0.82
  -6  -4  -1    5.46    0.82
   6  -4   1    3.78    0.67
   6  -4   1    4.23    0.94
   6  -4   1    4.23    0.94
  -6  -4  -1    4.75    0.55
  -6  -4  -1    3.90    0.51
  -6   4  -1    4.05    0.95
  -6   4  -1    3.24    0.58
   6   4   1    3.66    0.49
  -6   4  -1    4.05    0.95
  -6   4  -1    4.26    0.58
   6   4   1    4.27    0.55
   6   4   1    4.10    0.46
   6   4   1    4.17    0.43
   6   4   1    4.94    0.84
   6   4   1    4.94    0.84
  -7  -4  -1    4.49    0.56
  -7  -4  -1    4.62    0.79
  -7  -4  -1    4.62    0.79
   7  -4   1    4.13    0.60
   7  -4   1    4.16    1.02
   7  -4   1    3.77    0.71
   7  -4   1    4.16    1.02
   7   4   1    2.53    0.67
  -7   4  -1    5.93    1.20
  -7   4  -1    4.80    0.74
   7   4   1    4.74    0.49
  -7   4  -1    4.04    0.61
   7   4   1    4.60    0.60
  -7   4  -1    5.93    1.20
   7   4   1    2.53    0.67
   7   4   1    3.70    0.46
   8  -4   1    4.54    1.10
   8  -4   1    4.54    1.10
  -8  -4  -1    5.15    0.64
   8  -4   1    4.51    0.64
   8  -4   1    5.43    0.86
  -8  -4  -1    5.29    0.91
  -8  -4  -1    5.29    0.91
   8   4   1    5.80    0.57
  -8   4  -1    3.76    0.70
   8   4   1    6.52    1.07
   8   4   1    6.52    1.07
  -8   4  -1    5.62    0.71
   8   4   1    4.19    0.61
   8   4   1    6.10    0.61
  -8   4  -1    7.09    1.39
  -8   4  -1    7.09    1.40
  -9  -4  -1   14.65    1.56
   9  -4   1   16.43    2.15
  -9  -4  -1   14.34    0.97
  -9  -4  -1   14.65    1.56
   9  -4   1   16.43    2.15
   9  -4   1   18.39    1.39
   9  -4   1   16.27    1.11
  -9   4  -1   15.21    2.07
  -9   4  -1   16.17    1.26
  -9   4  -1   16.51    1.11
   9   4   1   14.56    1.66
   9   4   1   16.18    0.93
  -9   4  -1   15.21    2.07
   9   4   1   16.30    1.06
   9   4   1   14.56    1.66
  10  -4   1   21.15    1.55
  10  -4   1   19.35    1.27
 -10  -4  -1   18.81    1.15
  10  -4   1   18.80    2.37
  10  -4   1   18.81    2.37
  10   4   1   17.57    1.95
 -10   4  -1   21.54    2.59
 -10   4  -1   19.23    1.25
  10   4   1   18.83    1.22
 -10   4  -1   21.54    2.59
  10   4   1   17.57    1.95
  10   4   1   20.54    1.10
 -10   4  -1   19.77    1.43
  11  -4   1    1.85    0.57
 -11  -4  -1    0.77    0.40
  11  -4   1    1.41    0.64
  11   4   1    2.15    0.54
  11   4   1    2.01    0.72
  11   4   1    2.01    0.72
  11   4   1    1.95    0.48
 -11   4  -1    1.91    0.74
 -11   4  -1    1.91    0.74
 -11   4  -1    1.85    0.65
 -12  -4  -1   -0.31    0.35
  12  -4   1    0.14    0.43
  12  -4   1   -0.18    0.38
  12   4   1    0.04    0.37
  12   4   1    0.10    0.28
  12   4   1    0.10    0.28
 -12   4  -1    0.57    0.52
  12   4   1   -0.61    0.24
  13  -4   1   45.58    2.62
 -13  -4  -1   47.24    2.16
  13  -4   1   49.00    2.34
  13   4   1   43.57    1.98
  13   4   1   46.57    2.25
  13   4   1   46.51    3.07
  13   4   1   46.51    3.08
 -13   4  -1   44.68    2.50
  14  -4   1    3.13    0.90
  14  -4   1    1.79    0.68
  14   4   1    3.33    0.96
 -14   4  -1    3.06    0.88
  14   4   1    3.33    0.96
  14   4   1    1.34    0.57
  14   4   1    2.64    0.59
  15  -4   1    9.73    1.51
  15  -4   1   12.97    1.48
  15   4   1   14.70    1.16
  15   4   1   10.02    1.79
  15   4   1   10.02    1.79
 -15   4  -1   13.75    1.68
  16  -4   1    9.25    1.30
  16  -4   1    8.62    1.48
  16   4   1    8.50    1.06
  16   4   1    8.36    1.70
 -16   4  -1    8.15    1.39
  16   4   1    8.35    1.70
  17  -4   1   -0.50    0.57
  17  -4   1    0.58    0.78
  17   4   1    1.28    0.58
 -17   4  -1    1.07    0.85
  18  -4   1    2.52    0.98
  18  -4   1    3.91    1.05
 -18   4  -1    4.15    1.20
  18   4   1    4.81    0.90
  19  -5  -1    2.85    1.05
  19   5  -1    4.09    0.91
  18  -5  -1    2.66    0.98
  18  -5  -1    6.41    1.45
  18   5  -1    6.87    1.06
 -18   5   1    6.27    1.38
  17  -5  -1    3.51    1.13
  17  -5  -1    3.83    1.01
  17   5  -1    2.91    0.75
  17   5  -1    4.91    1.37
  17   5  -1    4.91    1.37
 -17   5   1    5.63    1.31
  16  -5  -1    3.70    0.96
  16  -5  -1    3.61    1.08
  16   5  -1    3.11    1.02
  16   5  -1    3.11    1.02
  16   5  -1    4.08    0.81
 -16   5   1    1.35    0.91
  15  -5  -1    0.51    0.61
  15  -5  -1    0.41    0.58
 -15  -5   1   -0.56    0.48
  15   5  -1    0.23    0.43
  15   5  -1    0.68    0.58
  15   5  -1    0.86    0.63
  15   5  -1    0.86    0.62
 -15   5   1   -0.20    0.56
 -14  -5   1    5.20    0.90
  14  -5  -1    3.70    0.99
  14  -5  -1    4.02    0.89
  14   5  -1    2.83    0.99
 -14   5   1    3.96    1.00
  14   5  -1    5.53    0.97
  14   5  -1    2.83    0.99
  14   5  -1    4.67    0.79
 -13  -5   1    2.01    0.64
  13  -5  -1    0.20    0.51
  13  -5  -1    2.79    0.72
  13   5  -1    1.93    0.63
  13   5  -1    1.99    0.87
  13   5  -1    1.99    0.87
 -13   5   1    0.80    0.60
  13   5  -1    1.95    0.54
  12  -5  -1    9.94    1.36
  12  -5  -1   12.26    1.29
 -12  -5   1   15.44    1.38
  12   5  -1   13.32    1.94
  12   5  -1   13.32    1.94
 -12   5   1   12.41    1.46
 -12   5   1   12.68    2.16
  12   5  -1   14.40    1.39
  12   5  -1   13.95    1.06
 -12   5   1   12.68    2.16
  11  -5  -1    2.74    0.65
  11  -5  -1    3.09    0.80
 -11  -5   1    2.40    0.61
  11   5  -1    2.59    0.91
 -11   5   1    3.11    1.02
 -11   5   1    2.30    0.64
 -11   5   1    3.03    0.78
  11   5  -1    4.08    0.75
  11   5  -1    3.10    0.59
  11   5  -1    2.59    0.91
 -11   5   1    3.11    1.02
 -10  -5   1   10.15    1.51
  10  -5  -1    9.49    1.25
 -10  -5   1   10.15    1.51
  10  -5  -1   10.42    1.08
 -10  -5   1   10.62    1.05
  10   5  -1    9.81    1.55
 -10   5   1   12.15    1.16
  10   5  -1    9.81    1.55
 -10   5   1   12.41    2.09
  10   5  -1   10.66    1.12
 -10   5   1   12.41    2.09
 -10   5   1    8.64    1.14
  10   5  -1   10.66    0.87
   9  -5  -1   13.25    1.05
   9  -5  -1   16.15    1.57
  -9  -5   1   11.76    0.97
  -9  -5   1   16.53    1.86
  -9  -5   1   16.53    1.86
  -9   5   1   13.37    2.07
   9   5  -1   13.27    0.92
   9   5  -1   13.98    1.77
  -9   5   1   13.36    2.08
  -9   5   1   13.48    1.08
   9   5  -1   13.98    1.77
   9   5  -1   13.39    1.04
  -9   5   1   14.74    1.44
  -8  -5   1   25.72    1.87
  -8  -5   1   23.71    1.33
  -8  -5   1   25.72    1.87
   8  -5  -1   26.42    1.38
   8  -5  -1   24.06    1.61
  -8   5   1   24.86    2.74
  -8   5   1   24.67    1.55
   8   5  -1   21.29    1.32
   8   5  -1   25.39    1.24
  -8   5   1   23.68    1.36
   8   5  -1   25.89    2.00
   8   5  -1   25.89    2.00
  -8   5   1   24.86    2.74
   7  -5  -1   13.00    1.30
   7  -5  -1   14.38    0.98
   7   5  -1   13.71    0.98
  -7   5   1   14.61    2.00
  -7   5   1   14.61    2.00
  -7   5   1   12.55    1.24
   7   5  -1   12.44    0.84
   7   5  -1   11.69    1.52
  -7   5   1   12.35    0.97
   7   5  -1   11.69    1.52
   6  -5  -1   19.20    1.09
   6  -5  -1   22.46    2.37
   6  -5  -1   17.22    1.27
  -6  -5   1   17.77    1.07
  -6  -5   1   19.87    0.91
   6  -5  -1   22.46    2.37
  -6   5   1   19.13    2.27
   6   5  -1   19.88    1.15
   6   5  -1   18.60    1.59
  -6   5   1   19.13    2.27
  -6   5   1   19.56    1.13
   6   5  -1   18.60    1.59
   6   5  -1   18.20    0.99
  -6   5   1   18.24    1.23
   5  -5  -1   -0.27    0.21
  -5  -5   1    0.34    0.19
   5  -5  -1    0.16    0.25
   5  -5  -1    0.66    0.37
   5  -5  -1   -0.27    0.21
  -5  -5   1    0.09    0.25
  -5   5   1    0.20    0.29
   5   5  -1    0.48    0.41
   5   5  -1    0.48    0.41
   5   5  -1    0.89    0.33
  -5   5   1    0.47    0.44
   5   5  -1    0.22    0.22
  -5   5   1    0.13    0.26
  -5   5   1    0.47    0.44
  -4  -5   1   36.71    1.33
   4  -5  -1   38.67    2.42
  -4  -5   1   37.54    1.58
   4  -5  -1   35.01    1.45
   4  -5  -1   38.66    2.42
   4  -5  -1   32.90    1.68
   4   5  -1   35.76    1.57
  -4   5   1   34.17    1.49
  -4   5   1   34.25    1.63
   4   5  -1   35.46    2.20
   4   5  -1   35.46    2.20
   4   5  -1   34.31    1.39
  -4   5   1   36.40    2.43
  -4   5   1   36.40    2.42
  -3  -5   1   56.14    1.93
  -3  -5   1   59.77    2.21
   3  -5  -1   64.36    3.15
   3  -5  -1   64.36    3.14
   3  -5  -1   61.57    2.36
   3  -5  -1   60.33    2.06
   3   5  -1   57.93    2.95
  -3   5   1   57.80    3.09
   3   5  -1   63.83    2.05
  -3   5   1   62.25    2.13
   3   5  -1   57.93    2.95
  -3   5   1   62.55    2.30
  -3   5   1   57.81    3.09
   3   5  -1   66.39    2.27
   2  -5  -1    0.84    0.47
   2  -5  -1    1.00    0.31
  -2  -5   1    0.87    0.27
  -2  -5   1    0.87    0.33
   2  -5  -1    0.84    0.47
   2  -5  -1    0.98    0.36
   2   5  -1    0.94    0.47
   2   5  -1    0.70    0.32
   2   5  -1    0.94    0.47
  -2   5   1    0.53    0.28
  -2   5   1    1.30    0.37
  -2   5   1    1.15    0.52
   2   5  -1    0.85    0.28
  -2   5   1    1.15    0.52
   1  -5  -1   30.47    1.39
  -1  -5   1   28.39    1.15
   1  -5  -1   26.48    1.12
  -1  -5   1   27.74    1.86
   1  -5  -1   27.75    1.85
   1  -5  -1   27.75    1.85
  -1  -5   1   27.21    1.35
  -1  -5   1   27.74    1.86
  -1   5   1   25.99    1.84
  -1   5   1   25.99    1.84
  -1   5   1   27.87    1.31
   1   5  -1   25.99    1.18
   1   5  -1   25.53    1.30
   1   5  -1   27.48    1.89
   1   5  -1   27.48    1.89
  -1   5   1   26.25    1.17
   0  -5  -1   19.58    0.91
   0  -5   1   23.12    1.73
   0  -5   1   23.12    1.73
   0  -5   1   22.29    1.19
   0  -5   1   18.96    0.95
   0  -5  -1   20.48    1.06
   0  -5  -1   19.66    1.09
   0   5  -1   19.73    1.62
   0   5   1   21.57    1.10
   0   5  -1   21.02    1.03
   0   5   1   20.79    1.58
   0   5   1   20.79    1.58
   0   5   1   20.85    1.11
   0   5  -1   19.73    1.62
   0   5  -1   19.72    1.12
   0   5   1   19.62    0.96
   1  -5   1    0.49    0.39
  -1  -5  -1    0.05    0.21
   1  -5   1    0.16    0.21
   1  -5   1   -0.03    0.25
   1  -5   1    0.49    0.39
  -1  -5  -1    0.35    0.27
  -1  -5  -1    0.11    0.17
   1   5   1    0.19    0.31
  -1   5  -1   -0.31    0.18
  -1   5  -1    0.17    0.23
  -1   5  -1   -0.07    0.31
   1   5   1    0.11    0.23
  -1   5  -1   -0.07    0.31
   1   5   1    0.19    0.31
   1   5   1    0.29    0.24
   1   5   1    0.12    0.20
  -2  -5  -1   -0.22    0.17
   2  -5   1   -0.24    0.24
   2  -5   1   -0.24    0.24
   2  -5   1   -0.16    0.20
   2  -5   1    0.18    0.26
  -2  -5  -1    0.03    0.16
  -2  -5  -1    0.09    0.22
   2   5   1    0.21    0.21
  -2   5  -1   -0.11    0.22
   2   5   1   -0.17    0.15
  -2   5  -1   -0.01    0.21
   2   5   1    0.26    0.23
   2   5   1    0.55    0.37
  -2   5  -1    0.22    0.38
  -2   5  -1    0.22    0.38
   2   5   1    0.55    0.37
   3  -5   1    3.01    0.58
   3  -5   1    2.63    0.73
   3  -5   1    2.63    0.73
  -3  -5  -1    1.76    0.38
  -3  -5  -1    2.37    0.41
   3  -5   1    2.12    0.41
   3   5   1    2.02    0.40
  -3   5  -1    2.68    0.80
  -3   5  -1    2.52    0.46
   3   5   1    1.57    0.54
   3   5   1    2.32    0.42
   3   5   1    1.57    0.54
   3   5   1    2.07    0.35
  -3   5  -1    2.15    0.49
  -3   5  -1    2.68    0.80
   4  -5   1   32.50    2.25
   4  -5   1   27.59    1.31
  -4  -5  -1   31.74    1.33
  -4  -5  -1   29.47    1.30
   4  -5   1   32.50    2.25
   4  -5   1   28.08    1.55
   4   5   1   29.69    1.20
  -4   5  -1   29.98    1.37
   4   5   1   30.42    1.32
  -4   5  -1   29.20    2.21
   4   5   1   28.47    1.82
  -4   5  -1   29.20    2.21
   4   5   1   28.47    1.82
  -4   5  -1   28.62    1.51
   4   5   1   28.54    1.13
   4   5   1   31.59    1.35
   5  -5   1    5.99    0.68
   5  -5   1    2.96    0.86
  -5  -5  -1    3.28    0.48
   5  -5   1    2.96    0.86
   5  -5   1    5.21    0.80
  -5  -5  -1    4.38    0.55
  -5   5  -1    4.20    0.68
   5   5   1    3.85    0.52
  -5   5  -1    4.69    1.08
   5   5   1    4.82    0.87
  -5   5  -1    4.69    1.08
   5   5   1    3.68    0.45
   5   5   1    4.21    0.58
   5   5   1    4.63    0.47
  -5   5  -1    4.32    0.59
   5   5   1    4.82    0.87
   6  -5   1    8.11    1.46
   6  -5   1    8.35    1.01
   6  -5   1    9.49    0.89
  -6  -5  -1    8.17    1.08
  -6  -5  -1    8.17    1.08
   6  -5   1    8.11    1.46
  -6   5  -1    6.59    1.32
  -6   5  -1    7.47    0.92
   6   5   1    7.78    1.13
   6   5   1    9.58    0.62
   6   5   1    8.53    0.64
  -6   5  -1    6.59    1.33
  -6   5  -1    8.52    0.88
   6   5   1    7.78    1.13
   6   5   1    7.79    0.78
   7  -5   1    0.28    0.32
  -7  -5  -1    0.58    0.27
   7  -5   1    0.02    0.33
   7  -5   1   -0.13    0.28
  -7  -5  -1    0.03    0.23
  -7  -5  -1    0.58    0.27
   7  -5   1   -0.13    0.28
  -7   5  -1   -0.16    0.28
   7   5   1    0.16    0.22
  -7   5  -1   -0.34    0.24
   7   5   1   -0.11    0.20
   7   5   1   -0.11    0.20
   7   5   1   -0.15    0.15
  -7   5  -1   -0.14    0.32
   7   5   1    0.30    0.24
  -7   5  -1   -0.14    0.32
   8  -5   1   -0.13    0.27
   8  -5   1    0.39    0.42
  -8  -5  -1    0.26    0.28
  -8  -5  -1   -0.02    0.16
   8  -5   1   -0.13    0.27
   8  -5   1   -0.25    0.28
  -8  -5  -1   -0.02    0.16
   8   5   1    0.01    0.26
   8   5   1   -0.12    0.14
  -8   5  -1    0.01    0.38
   8   5   1    0.11    0.27
  -8   5  -1    0.01    0.38
   8   5   1    0.11    0.27
  -8   5  -1   -0.13    0.32
   8   5   1   -0.01    0.20
  -8   5  -1    0.13    0.33
  -9  -5  -1    5.31    0.94
  -9  -5  -1    4.96    0.68
   9  -5   1    3.84    1.07
   9  -5   1    5.39    0.93
   9  -5   1    3.84    1.07
  -9  -5  -1    5.31    0.94
   9  -5   1    5.91    0.83
   9   5   1    4.77    0.98
   9   5   1    4.77    0.99
  -9   5  -1    3.38    1.02
   9   5   1    4.86    0.71
   9   5   1    4.46    0.59
  -9   5  -1    4.47    0.83
  -9   5  -1    3.38    1.02
  -9   5  -1    4.32    0.73
 -10  -5  -1    0.26    0.33
  10  -5   1    0.51    0.45
  10  -5   1    0.99    0.55
 -10   5  -1   -0.21    0.30
  10   5   1    0.25    0.33
  10   5   1    0.65    0.41
 -10   5  -1    0.96    0.51
 -10   5  -1   -0.21    0.30
 -10   5  -1   -0.12    0.35
  10   5   1    0.47    0.32
  10   5   1    0.65    0.41
  11  -5   1    8.74    1.04
  11  -5   1    8.89    1.27
 -11  -5  -1    8.51    0.95
  11   5   1    9.45    1.49
  11   5   1    7.95    0.84
 -11   5  -1    8.52    1.18
  11   5   1    9.45    1.49
  11   5   1    8.26    0.98
 -12  -5  -1    7.81    0.96
  12  -5   1    7.12    1.20
  12  -5   1    7.44    1.06
  12   5   1    6.68    0.82
 -12   5  -1    5.96    1.08
  12   5   1    7.85    1.41
  12   5   1    8.30    1.01
  12   5   1    7.85    1.41
  13  -5   1    3.33    0.83
 -13  -5  -1    3.88    0.78
  13  -5   1    2.59    0.84
  13   5   1    2.87    0.69
  13   5   1    4.70    1.12
 -13   5  -1    3.76    0.92
  13   5   1    4.70    1.12
  13   5   1    4.91    0.75
  14  -5   1    8.84    1.22
  14  -5   1    6.65    1.27
  14   5   1    7.59    0.94
  14   5   1    6.29    1.36
 -14   5  -1    7.85    1.34
  14   5   1    6.29    1.36
  15  -5   1    0.86    0.67
  15  -5   1    0.00    0.62
  15   5   1    0.55    0.49
  15   5   1   -0.18    0.38
  15   5   1    0.55    0.49
 -15   5  -1   -0.40    0.61
  16  -5   1    1.80    0.83
  16  -5   1   -0.41    0.59
  16   5   1    1.10    0.71
  16   5   1    1.10    0.71
 -16   5  -1    0.32    0.75
  16   5   1    1.27    0.55
  17  -5   1    0.18    0.71
  17  -5   1    0.74    0.82
  17   5   1    1.77    0.64
 -17   5  -1    1.27    0.91
  18  -5   1    1.29    0.83
  18  -5   1    0.61    0.75
  18   5   1   -0.05    0.47
 -18   5  -1    0.05    0.76
  18  -6  -1    8.73    1.44
  18  -6  -1    6.28    1.41
  18   6  -1    6.51    1.06
 -18   6   1    1.77    1.00
  17  -6  -1    1.06    0.86
  17  -6  -1    3.81    1.24
  17   6  -1    1.20    0.61
 -17   6   1    1.76    0.90
  16  -6  -1    0.33    0.73
  16  -6  -1    0.19    0.72
 -16   6   1   -0.23    0.68
  16   6  -1    0.32    0.49
  16   6  -1    0.10    0.60
  16   6  -1    0.10    0.60
  15  -6  -1   16.53    1.71
  15  -6  -1   17.93    2.05
 -15   6   1   18.68    2.03
  15   6  -1   13.65    2.12
  15   6  -1   13.65    2.12
  15   6  -1   16.50    1.30
 -14  -6   1    0.80    0.55
  14  -6  -1   -0.14    0.56
  14  -6  -1    0.21    0.58
  14   6  -1   -0.01    0.41
  14   6  -1   -0.01    0.41
  14   6  -1    0.64    0.46
 -14   6   1    0.59    0.68
  14   6  -1    0.99    0.56
 -13  -6   1    0.30    0.51
  13  -6  -1    0.28    0.59
  13  -6  -1   -0.71    0.43
  13   6  -1   -0.16    0.33
  13   6  -1    0.32    0.42
 -13   6   1    1.28    0.73
  13   6  -1    0.99    0.64
  13   6  -1    0.99    0.64
  12  -6  -1    7.28    1.26
  12  -6  -1    7.56    1.06
 -12  -6   1    7.26    0.99
  12   6  -1    7.58    0.91
  12   6  -1    9.03    1.61
  12   6  -1    9.03    1.61
 -12   6   1    6.70    1.18
  12   6  -1    7.18    1.02
  11  -6  -1   27.87    1.71
 -11  -6   1   27.75    1.62
  11  -6  -1   24.95    1.96
 -11   6   1   37.66    3.82
  11   6  -1   28.46    2.40
 -11   6   1   37.66    3.82
 -11   6   1   26.88    1.91
  11   6  -1   28.19    1.71
  11   6  -1   28.46    2.40
  11   6  -1   30.08    1.55
 -11   6   1   29.49    1.75
  10  -6  -1   20.66    1.69
 -10  -6   1   22.50    1.39
  10  -6  -1   18.71    1.38
  10   6  -1   20.41    2.31
  10   6  -1   20.41    2.31
 -10   6   1   19.04    2.60
  10   6  -1   23.26    1.47
 -10   6   1   19.04    2.60
 -10   6   1   23.29    1.51
 -10   6   1   23.67    1.68
  10   6  -1   19.67    1.20
   9  -6  -1    2.82    0.74
  -9  -6   1    4.69    0.74
   9  -6  -1    4.11    0.71
  -9  -6   1    2.25    0.68
  -9  -6   1    2.25    0.69
   9   6  -1    4.40    1.06
   9   6  -1    4.09    0.71
   9   6  -1    5.25    0.69
  -9   6   1    4.39    1.30
   9   6  -1    4.40    1.06
  -9   6   1    3.96    0.72
  -9   6   1    4.39    1.31
  -9   6   1    3.72    0.79
  -8  -6   1    1.63    0.60
  -8  -6   1    1.63    0.60
  -8  -6   1    2.50    0.58
   8  -6  -1    2.24    0.67
   8  -6  -1    2.23    0.56
   8   6  -1    2.33    0.75
  -8   6   1    2.37    0.66
  -8   6   1    2.76    0.98
   8   6  -1    2.30    0.48
  -8   6   1    2.76    0.98
   8   6  -1    1.72    0.48
   8   6  -1    2.33    0.75
  -8   6   1    2.58    0.61
   7  -6  -1    2.52    0.54
   7  -6  -1    2.67    0.69
  -7  -6   1    2.26    0.54
  -7   6   1    2.92    0.97
   7   6  -1    3.07    0.86
  -7   6   1    1.35    0.48
  -7   6   1    2.92    0.97
   7   6  -1    3.06    0.51
   7   6  -1    3.07    0.86
   7   6  -1    2.47    0.56
  -7   6   1    1.31    0.51
  -6  -6   1   11.17    0.90
  -6  -6   1   10.04    0.66
   6  -6  -1   10.50    0.87
   6  -6  -1    9.03    1.09
  -6   6   1   16.32    2.21
  -6   6   1   11.28    1.03
   6   6  -1    9.26    0.77
   6   6  -1    8.49    0.92
  -6   6   1    9.90    1.08
   6   6  -1   10.47    1.51
  -6   6   1   16.32    2.21
   6   6  -1   10.47    1.51
  -5  -6   1    0.31    0.30
   5  -6  -1    0.49    0.32
   5  -6  -1    0.59    0.38
  -5  -6   1    0.41    0.23
  -5   6   1    0.70    0.56
   5   6  -1    0.21    0.26
   5   6  -1    0.71    0.44
   5   6  -1    0.28    0.29
   5   6  -1    0.71    0.44
  -5   6   1    0.71    0.38
  -5   6   1    0.70    0.56
  -5   6   1    0.63    0.34
  -4  -6   1    0.45    0.30
   4  -6  -1    0.29    0.27
  -4  -6   1    0.06    0.18
   4  -6  -1   -0.27    0.25
  -4   6   1   -0.03    0.27
   4   6  -1   -0.13    0.19
  -4   6   1    0.05    0.40
  -4   6   1    0.05    0.40
   4   6  -1    0.24    0.24
  -4   6   1    0.01    0.28
   4   6  -1   -0.30    0.25
   4   6  -1   -0.30    0.25
   3  -6  -1    4.07    0.55
   3  -6  -1    4.17    0.70
  -3  -6   1    3.81    0.63
  -3  -6   1    4.18    0.50
   3   6  -1    3.51    0.61
   3   6  -1    1.68    0.67
  -3   6   1    2.49    0.84
   3   6  -1    3.80    0.53
  -3   6   1    2.49    0.84
  -3   6   1    4.69    0.70
  -3   6   1    3.64    0.55
   3   6  -1    1.68    0.67
   2  -6  -1   76.45    2.49
  -2  -6   1   78.39    2.46
   2  -6  -1   77.48    2.84
  -2  -6   1   80.09    2.79
  -2   6   1   76.40    2.57
   2   6  -1   73.49    3.64
  -2   6   1   74.78    3.73
   2   6  -1   75.35    2.72
   2   6  -1   73.48    3.64
   2   6  -1   77.54    2.54
  -2   6   1   76.93    2.77
  -2   6   1   74.77    3.73
   1  -6  -1   16.23    0.90
   1  -6  -1   15.49    1.07
  -1  -6   1   15.75    0.88
  -1  -6   1   15.69    1.08
   1   6  -1   15.34    1.79
   1   6  -1   14.60    0.93
   1   6  -1   15.62    1.05
  -1   6   1   16.97    1.90
   1   6  -1   15.34    1.79
  -1   6   1   14.94    1.02
  -1   6   1   15.31    0.95
  -1   6   1   16.97    1.90
   0  -6  -1   20.58    1.00
   0  -6  -1   19.70    1.19
   0  -6   1   18.38    1.20
   0  -6   1   19.84    1.02
   0   6  -1   22.77    1.14
   0   6  -1   21.89    2.19
   0   6  -1   21.89    2.19
   0   6   1   18.96    1.04
   0   6  -1   21.13    1.24
   0   6   1   20.90    1.75
   0   6   1   20.90    1.75
   0   6   1   21.43    1.20
  -1  -6  -1   33.81    1.33
  -1  -6  -1   36.76    1.63
   1  -6   1   39.28    1.81
   1  -6   1   35.08    1.47
   1   6   1   36.12    2.27
  -1   6  -1   34.34    1.51
  -1   6  -1   36.50    1.72
   1   6   1   36.12    2.27
  -1   6  -1   34.03    2.41
   1   6   1   38.02    1.49
   1   6   1   34.89    1.57
  -1   6  -1   34.03    2.40
   2  -6   1   32.64    1.70
  -2  -6  -1   34.53    1.28
  -2  -6  -1   35.59    1.57
   2  -6   1   33.33    1.45
   2   6   1   33.06    1.39
   2   6   1   33.25    2.14
  -2   6  -1   33.50    2.40
  -2   6  -1   31.03    1.63
  -2   6  -1   33.50    2.40
   2   6   1   33.25    2.15
  -2   6  -1   34.76    1.52
   2   6   1   32.93    1.51
   3  -6   1    4.13    0.58
  -3  -6  -1    3.81    0.58
   3  -6   1    3.05    0.65
   3   6   1    3.27    0.53
   3   6   1    2.75    0.45
  -3   6  -1    2.68    0.57
   3   6   1    3.24    0.79
  -3   6  -1    3.41    0.88
  -3   6  -1    3.58    0.57
  -3   6  -1    3.41    0.88
   3   6   1    3.24    0.79
   4  -6   1   41.12    1.76
  -4  -6  -1   43.79    1.78
   4  -6   1   42.18    2.09
  -4   6  -1   40.88    2.84
   4   6   1   42.05    2.46
   4   6   1   44.20    1.64
   4   6   1   42.06    2.46
  -4   6  -1   40.89    2.84
   4   6   1   45.14    1.81
  -4   6  -1   45.04    2.06
  -4   6  -1   45.06    1.85
   5  -6   1    3.92    0.60
   5  -6   1    3.90    0.74
  -5  -6  -1    4.25    0.61
  -5   6  -1    2.98    0.64
  -5   6  -1    4.13    1.09
   5   6   1    3.35    0.81
   5   6   1    3.56    0.50
  -5   6  -1    3.78    0.63
   5   6   1    4.00    0.58
  -5   6  -1    4.13    1.09
   5   6   1    3.35    0.81
   5   6   1    3.61    0.45
   6  -6   1    2.25    0.63
  -6  -6  -1    3.83    0.58
   6  -6   1    3.40    0.59
   6   6   1    4.96    0.53
  -6   6  -1    4.14    1.11
  -6   6  -1    4.35    0.79
   6   6   1    4.47    0.93
   6   6   1    4.47    0.93
   6   6   1    3.81    0.59
  -6   6  -1    3.53    0.61
  -6   6  -1    4.14    1.10
   6   6   1    3.74    0.51
  -7  -6  -1   16.09    1.36
  -7  -6  -1   16.09    1.36
   7  -6   1   14.59    1.48
  -7  -6  -1   13.48    0.96
   7  -6   1   14.67    1.08
   7   6   1   12.62    1.55
   7   6   1   14.12    0.99
  -7   6  -1   15.95    2.29
  -7   6  -1   15.95    2.28
   7   6   1   14.55    0.91
  -7   6  -1   15.34    1.46
  -7   6  -1   15.23    1.13
   7   6   1   12.62    1.55
   8  -6   1   -0.15    0.33
  -8  -6  -1    0.20    0.25
  -8  -6  -1    0.00    0.29
   8  -6   1   -0.22    0.38
  -8  -6  -1    0.20    0.25
  -8   6  -1   -0.27    0.34
  -8   6  -1    0.17    0.43
  -8   6  -1    0.17    0.43
  -8   6  -1    0.41    0.42
   8   6   1    0.29    0.31
   8   6   1    0.10    0.26
   8   6   1    0.50    0.34
   8   6   1    0.50    0.34
   9  -6   1    3.23    0.69
   9  -6   1    2.39    0.73
  -9  -6  -1    2.95    0.58
   9   6   1    3.45    0.89
  -9   6  -1    1.83    0.87
   9   6   1    2.83    0.52
   9   6   1    3.69    0.66
   9   6   1    3.45    0.89
  -9   6  -1    1.83    0.87
  -9   6  -1    3.96    0.75
  -9   6  -1    2.87    0.74
  10  -6   1    5.13    0.88
 -10  -6  -1    4.86    0.74
  10  -6   1    6.08    1.08
  10   6   1    4.49    0.66
 -10   6  -1    8.13    1.74
  10   6   1    6.09    1.21
  10   6   1    6.09    1.21
  10   6   1    5.56    0.80
 -10   6  -1    8.13    1.74
 -10   6  -1    3.88    0.85
  11  -6   1    0.35    0.48
 -11  -6  -1    0.18    0.37
  11  -6   1    0.00    0.48
  11   6   1   -0.13    0.31
  11   6   1    0.19    0.32
 -11   6  -1    0.08    0.48
  11   6   1    0.19    0.32
  11   6   1   -0.09    0.30
 -12  -6  -1    6.77    0.92
  12  -6   1    6.39    1.03
  12  -6   1    7.62    1.27
  12   6   1    8.41    0.91
  12   6   1    6.29    1.30
 -12   6  -1    5.63    1.10
  12   6   1    7.28    0.99
  12   6   1    6.29    1.30
  13  -6   1    0.97    0.63
  13  -6   1    1.55    0.76
  13   6   1    1.84    0.72
 -13   6  -1    2.67    0.90
  13   6   1    1.84    0.72
  13   6   1    2.15    0.56
  14  -6   1   -0.80    0.45
  14  -6   1    0.34    0.63
 -14   6  -1    0.09    0.62
  14   6   1    0.66    0.46
  14   6   1    0.27    0.41
  14   6   1    0.66    0.46
  15  -6   1    0.36    0.64
  15  -6   1    1.05    0.79
 -15   6  -1    0.48    0.76
  15   6   1   -0.01    0.51
  15   6   1   -0.01    0.51
  15   6   1    0.11    0.43
  16  -6   1    6.59    1.24
  16  -6   1    3.57    1.13
  16   6   1    5.14    0.87
 -16   6  -1    4.32    1.21
  17  -6   1   -0.08    0.66
  17  -6   1   -0.17    0.72
 -17   6  -1   -0.41    0.70
  17   6   1    0.44    0.51
  18  -7  -1    2.93    1.17
  18   7  -1    2.66    0.80
  17  -7  -1   -0.21    0.66
  17  -7  -1   -0.31    0.77
  17   7  -1   -0.46    0.44
 -17   7   1   -0.15    0.73
  16  -7  -1    0.92    0.81
  16  -7  -1   -0.37    0.70
 -16   7   1    0.56    0.79
  16   7  -1   -0.30    0.48
  16   7  -1    0.14    0.45
  16   7  -1   -0.30    0.48
  15  -7  -1   -0.32    0.61
  15  -7  -1    0.18    0.72
  15   7  -1    0.38    0.56
  15   7  -1    0.38    0.56
 -15   7   1    0.16    0.70
  15   7  -1    0.47    0.47
  14  -7  -1   11.50    1.50
  14  -7  -1    6.28    1.29
 -14   7   1   10.06    1.54
  14   7  -1    4.71    1.28
  14   7  -1    7.32    0.98
  14   7  -1    4.71    1.28
 -13  -7   1    0.86    0.57
  13  -7  -1    0.35    0.60
  13  -7  -1    0.50    0.63
  13   7  -1    0.20    0.40
  13   7  -1    0.07    0.31
 -13   7   1    0.48    0.65
  13   7  -1    0.07    0.31
  13   7  -1    0.16    0.48
 -12  -7   1   -0.08    0.45
  12  -7  -1   -0.03    0.54
  12  -7  -1   -0.14    0.48
  12   7  -1   -0.05    0.39
  12   7  -1   -0.29    0.34
 -12   7   1   -0.09    0.47
  12   7  -1    0.12    0.38
  12   7  -1   -0.29    0.34
  11  -7  -1    9.52    1.43
  11  -7  -1   13.04    1.37
 -11  -7   1   14.49    1.36
 -11   7   1   11.91    1.32
 -11   7   1   13.98    2.51
  11   7  -1   13.75    2.00
 -11   7   1   13.98    2.51
  11   7  -1   12.67    1.05
 -11   7   1   14.11    1.62
  11   7  -1   13.75    2.00
  11   7  -1   13.47    1.38
  10  -7  -1    1.54    0.60
 -10  -7   1    1.17    0.52
  10  -7  -1    1.71    0.72
 -10   7   1   -0.35    0.42
  10   7  -1    1.90    0.73
 -10   7   1   -0.35    0.42
  10   7  -1    1.40    0.56
 -10   7   1    1.22    0.61
  10   7  -1    1.90    0.73
  10   7  -1    0.14    0.34
 -10   7   1    0.72    0.54
   9  -7  -1   60.01    3.05
  -9  -7   1   67.16    2.68
   9  -7  -1   64.29    2.67
  -9   7   1   61.46    2.95
   9   7  -1   66.64    2.49
   9   7  -1   70.04    3.86
   9   7  -1   70.04    3.85
   9   7  -1   59.37    2.64
  -9   7   1   65.30    2.73
  -9   7   1   58.85    4.15
  -9   7   1   58.84    4.15
   8  -7  -1    3.29    0.81
   8  -7  -1    3.33    0.66
  -8   7   1    3.82    1.21
   8   7  -1    1.83    0.50
  -8   7   1    3.82    1.21
   8   7  -1    2.33    0.80
   8   7  -1    3.05    0.58
  -8   7   1    3.11    0.75
  -8   7   1    3.82    0.75
   8   7  -1    2.33    0.80
   7  -7  -1   26.63    1.81
   7  -7  -1   29.59    1.57
  -7  -7   1   27.53    1.55
   7   7  -1   26.68    1.56
  -7   7   1   28.20    1.61
   7   7  -1   25.50    2.16
   7   7  -1   28.29    1.44
  -7   7   1   32.89    3.44
  -7   7   1   32.89    3.44
   7   7  -1   25.50    2.16
  -7   7   1   29.75    1.81
   6  -7  -1    1.92    0.62
   6  -7  -1    2.08    0.52
  -6  -7   1    1.21    0.43
   6   7  -1    2.47    0.80
   6   7  -1    1.82    0.45
  -6   7   1    1.29    0.74
  -6   7   1    1.91    0.53
  -6   7   1    1.29    0.74
   6   7  -1    2.47    0.80
  -6   7   1    1.77    0.56
   6   7  -1    1.92    0.52
  -5  -7   1    3.96    0.68
   5  -7  -1    2.96    0.70
  -5  -7   1    4.16    0.53
   5  -7  -1    3.64    0.60
  -5   7   1    3.56    0.69
  -5   7   1    3.75    0.63
   5   7  -1    3.88    0.66
  -5   7   1    2.73    0.93
  -5   7   1    2.73    0.93
   5   7  -1    3.49    0.95
   5   7  -1    3.18    0.55
   5   7  -1    3.49    0.95
  -4  -7   1   55.99    2.36
  -4  -7   1   59.33    2.06
   4  -7  -1   57.79    2.58
   4  -7  -1   58.54    2.21
  -4   7   1   60.22    3.64
   4   7  -1   56.40    2.36
  -4   7   1   56.14    2.26
  -4   7   1   60.22    3.64
   4   7  -1   60.84    2.21
  -4   7   1   57.92    2.50
   4   7  -1   55.36    3.26
   4   7  -1   55.36    3.26
   3  -7  -1    0.55    0.38
  -3  -7   1    1.09    0.32
  -3  -7   1    0.37    0.37
   3  -7  -1    0.96    0.36
  -3   7   1    1.44    0.43
  -3   7   1    1.17    0.62
   3   7  -1    1.15    0.63
   3   7  -1    1.39    0.46
   3   7  -1    1.15    0.63
  -3   7   1    0.77    0.41
  -3   7   1    1.17    0.62
   3   7  -1    0.94    0.36
   2  -7  -1    4.95    0.63
  -2  -7   1    4.85    0.74
   2  -7  -1    5.77    0.84
  -2  -7   1    5.76    0.62
   2   7  -1    4.24    0.60
   2   7  -1    5.66    1.20
  -2   7   1    4.98    1.13
  -2   7   1    4.98    1.13
   2   7  -1    5.66    1.20
   2   7  -1    4.79    0.72
  -2   7   1    3.78    0.66
  -2   7   1    3.47    0.56
  -1  -7   1    2.02    0.43
   1  -7  -1    2.72    0.61
   1  -7  -1    3.05    0.47
  -1  -7   1    1.66    0.48
   1   7  -1    2.20    0.74
  -1   7   1    1.73    0.43
  -1   7   1    1.91    0.50
   1   7  -1    2.85    0.59
   1   7  -1    2.55    0.48
   1   7  -1    2.20    0.74
  -1   7   1    1.66    0.67
  -1   7   1    1.66    0.67
   0  -7  -1   48.51    2.10
   0  -7   1   50.13    1.87
   0  -7  -1   48.13    1.77
   0  -7   1   49.28    2.17
   0   7   1   44.97    2.01
   0   7  -1   48.80    2.13
   0   7   1   44.53    1.84
   0   7  -1   48.54    3.04
   0   7  -1   45.82    1.90
   0   7   1   45.02    2.85
   0   7   1   45.02    2.85
   0   7  -1   48.54    3.03
  -1  -7  -1    0.37    0.23
   1  -7   1    0.19    0.28
  -1  -7  -1    0.46    0.35
   1  -7   1    0.05    0.33
  -1   7  -1    0.14    0.43
   1   7   1    0.02    0.24
  -1   7  -1   -0.18    0.23
  -1   7  -1    0.14    0.43
  -1   7  -1    0.35    0.33
   1   7   1   -0.02    0.32
   1   7   1   -0.02    0.32
   1   7   1    0.09    0.29
  -2  -7  -1   10.96    1.05
  -2  -7  -1    9.40    0.67
   2  -7   1    7.86    1.00
   2  -7   1   10.09    0.91
  -2   7  -1   10.24    1.69
   2   7   1   10.45    1.51
  -2   7  -1    8.50    0.89
   2   7   1   10.45    1.51
  -2   7  -1   10.24    1.69
   2   7   1   10.07    0.99
   2   7   1    9.49    0.75
  -2   7  -1    8.42    0.99
   3  -7   1   -0.13    0.32
  -3  -7  -1    0.17    0.28
   3  -7   1   -0.05    0.28
   3   7   1   -0.14    0.22
  -3   7  -1   -0.46    0.29
  -3   7  -1    0.41    0.32
   3   7   1    0.00    0.30
  -3   7  -1   -0.04    0.25
   3   7   1    0.00    0.30
  -3   7  -1   -0.46    0.29
   3   7   1    0.37    0.29
  -4  -7  -1    6.28    0.77
   4  -7   1    6.76    0.79
   4  -7   1    7.10    1.03
   4   7   1    6.33    1.21
   4   7   1    6.33    1.21
   4   7   1    5.77    0.75
  -4   7  -1    5.59    0.76
  -4   7  -1    5.01    1.19
   4   7   1    7.23    0.73
  -4   7  -1    5.01    1.19
  -4   7  -1    5.50    0.86
   5  -7   1    0.80    0.48
  -5  -7  -1    1.29    0.40
   5  -7   1    1.16    0.44
  -5   7  -1    1.41    0.51
   5   7   1    1.06    0.56
  -5   7  -1    0.24    0.49
   5   7   1    1.06    0.56
  -5   7  -1    0.24    0.49
  -5   7  -1    1.92    0.52
   5   7   1    1.38    0.37
   5   7   1    1.24    0.42
   6  -7   1    3.26    0.64
  -6  -7  -1    2.60    0.55
   6  -7   1    2.05    0.64
   6   7   1    2.97    0.83
   6   7   1    2.97    0.83
   6   7   1    3.16    0.52
  -6   7  -1    3.80    0.76
  -6   7  -1    4.76    1.32
   6   7   1    3.26    0.60
  -6   7  -1    4.76    1.32
  -6   7  -1    3.37    0.69
   7  -7   1    0.54    0.41
   7  -7   1    1.12    0.55
  -7  -7  -1    1.03    0.42
   7   7   1    0.91    0.41
  -7   7  -1    0.14    0.58
   7   7   1    1.17    0.52
  -7   7  -1    0.14    0.57
  -7   7  -1    1.81    0.60
  -7   7  -1    0.76    0.49
   7   7   1    1.17    0.52
   7   7   1    0.65    0.34
  -8  -7  -1    0.98    0.42
   8  -7   1    1.33    0.55
   8  -7   1    0.56    0.52
   8   7   1    1.66    0.67
  -8   7  -1    0.31    0.59
  -8   7  -1    0.31    0.59
  -8   7  -1    1.02    0.51
  -8   7  -1    0.28    0.47
   8   7   1    0.62    0.33
   8   7   1    0.69    0.39
   8   7   1    1.66    0.67
   9  -7   1    8.47    1.26
   9  -7   1   10.60    1.19
  -9  -7  -1    9.98    1.02
   9   7   1    9.52    1.04
  -9   7  -1    8.34    1.20
   9   7   1    9.93    1.56
   9   7   1   10.07    0.95
  -9   7  -1   11.32    1.22
  -9   7  -1   16.24    2.47
  -9   7  -1   16.24    2.47
   9   7   1    9.93    1.56
  10  -7   1    2.78    0.87
 -10  -7  -1    2.54    0.60
  10  -7   1    3.05    0.77
 -10   7  -1    3.27    1.23
 -10   7  -1    3.27    1.23
  10   7   1    1.56    0.66
 -10   7  -1    0.50    0.54
  10   7   1    2.07    0.51
  10   7   1    1.64    0.54
  10   7   1    1.56    0.66
  11  -7   1   33.23    1.94
  11  -7   1   29.75    2.16
 -11  -7  -1   31.03    1.67
  11   7   1   30.50    1.73
 -11   7  -1   33.47    2.18
  11   7   1   28.27    1.52
  11   7   1   22.85    2.54
  11   7   1   22.85    2.54
  12  -7   1    8.88    1.23
  12  -7   1   10.75    1.58
 -12   7  -1    6.82    1.28
  12   7   1    9.37    1.63
  12   7   1    9.37    1.63
  12   7   1   10.48    1.05
  13  -7   1    0.78    0.64
  13  -7   1    0.56    0.68
  13   7   1    0.61    0.42
 -13   7  -1   -0.31    0.60
  13   7   1    0.75    0.53
  13   7   1    0.75    0.53
  14  -7   1    2.78    0.90
  14  -7   1    2.77    0.99
  14   7   1    3.66    1.07
 -14   7  -1    2.40    0.98
  14   7   1    3.81    0.73
  14   7   1    3.66    1.07
  15  -7   1   17.74    1.87
  15  -7   1   11.65    1.80
 -15   7  -1   10.69    1.67
  15   7   1   15.78    2.28
  15   7   1   15.78    2.28
  15   7   1   15.17    1.40
  16  -7   1    0.05    0.71
  16  -7   1    0.69    0.81
 -16   7  -1    0.60    0.80
  16   7   1    0.07    0.48
  17  -7   1    9.02    1.51
  17   7   1    8.35    1.11
  17  -8  -1    1.16    0.96
  17   8  -1    0.59    0.56
  16  -8  -1    0.16    0.64
  16  -8  -1    0.21    0.80
  16   8  -1    0.42    0.53
 -16   8   1    0.12    0.77
  15  -8  -1    0.86    0.84
  15  -8  -1   -0.19    0.72
 -15   8   1   -0.25    0.65
  15   8  -1    0.70    0.68
  15   8  -1   -0.20    0.41
  15   8  -1    0.70    0.68
  14  -8  -1    0.24    0.65
  14  -8  -1   -0.03    0.67
 -14   8   1    0.55    0.70
  14   8  -1    0.77    0.50
  14   8  -1   -0.65    0.41
  14   8  -1   -0.65    0.41
  13  -8  -1    0.70    0.70
  13  -8  -1   -0.30    0.61
 -13  -8   1    0.08    0.54
  13   8  -1    0.18    0.37
  13   8  -1   -0.40    0.36
  13   8  -1    0.79    0.58
  13   8  -1    0.18    0.37
 -13   8   1   -0.59    0.53
  12  -8  -1    0.11    0.56
  12  -8  -1    1.34    0.77
 -12  -8   1    0.15    0.48
 -12   8   1    0.52    0.63
  12   8  -1   -0.10    0.44
  12   8  -1    0.02    0.41
  12   8  -1    0.22    0.41
  12   8  -1    0.02    0.41
  11  -8  -1   14.18    1.78
 -11  -8   1   14.36    1.43
  11  -8  -1   13.59    1.50
 -11   8   1   14.66    2.66
 -11   8   1   15.10    1.56
  11   8  -1   12.28    1.21
 -11   8   1   13.61    1.67
  11   8  -1   14.78    2.20
  11   8  -1   14.78    2.20
 -11   8   1   14.66    2.66
  11   8  -1   14.65    1.46
  10  -8  -1   14.41    1.44
 -10  -8   1   13.65    1.36
  10  -8  -1   17.46    1.90
  10   8  -1   14.74    2.12
 -10   8   1   12.15    2.29
  10   8  -1   13.17    1.38
 -10   8   1   14.39    1.70
  10   8  -1   14.74    2.12
 -10   8   1   12.15    2.28
 -10   8   1   20.43    1.75
  10   8  -1   17.05    1.22
  -9  -8   1    2.64    0.69
   9  -8  -1    2.54    0.79
   9  -8  -1    2.38    0.68
  -9   8   1    1.31    0.62
  -9   8   1    2.34    0.70
   9   8  -1    1.53    0.71
   9   8  -1    1.53    0.71
   9   8  -1    2.34    0.56
  -9   8   1    1.69    0.94
  -9   8   1    1.69    0.94
   9   8  -1    1.65    0.59
  -8  -8   1    6.99    0.97
   8  -8  -1    6.94    0.96
   8  -8  -1    7.45    1.18
   8   8  -1    7.95    0.94
   8   8  -1    8.52    1.07
  -8   8   1   10.53    2.07
   8   8  -1    6.02    1.36
  -8   8   1    7.58    1.16
  -8   8   1   10.53    2.07
  -8   8   1    6.86    1.01
   8   8  -1    6.02    1.36
   7  -8  -1    9.49    1.05
  -7  -8   1    9.34    1.09
   7  -8  -1    7.95    1.16
   7   8  -1    8.41    1.05
  -7   8   1   10.42    2.03
  -7   8   1    7.91    1.03
  -7   8   1   10.42    2.03
   7   8  -1    9.70    1.70
   7   8  -1    8.72    0.92
   7   8  -1    9.70    1.70
  -6  -8   1    5.78    0.85
   6  -8  -1    4.39    0.91
   6  -8  -1    5.78    0.82
  -6   8   1    6.49    1.00
  -6   8   1    6.07    1.47
   6   8  -1    7.08    1.44
   6   8  -1    5.71    0.76
   6   8  -1    5.45    0.85
  -6   8   1    6.76    0.93
  -6   8   1    6.07    1.47
   6   8  -1    7.08    1.44
   5  -8  -1   22.39    1.64
  -5  -8   1   23.97    1.49
   5  -8  -1   21.42    1.34
  -5   8   1   20.52    1.53
  -5   8   1   23.70    2.80
   5   8  -1   21.63    1.27
  -5   8   1   23.70    2.80
   5   8  -1   21.99    2.49
   5   8  -1   22.90    1.47
  -5   8   1   21.33    1.40
   5   8  -1   21.99    2.49
   4  -8  -1    3.29    0.60
  -4  -8   1    4.89    0.82
   4  -8  -1    4.16    0.85
  -4  -8   1    3.71    0.57
  -4   8   1    4.46    1.25
   4   8  -1    3.14    0.95
  -4   8   1    4.45    1.25
  -4   8   1    4.00    0.70
  -4   8   1    5.05    0.86
   4   8  -1    3.52    0.61
   4   8  -1    3.14    0.95
   4   8  -1    5.06    0.80
   3  -8  -1    0.27    0.40
  -3  -8   1    0.33    0.29
  -3  -8   1   -0.16    0.32
   3  -8  -1    0.70    0.38
  -3   8   1   -0.20    0.30
  -3   8   1    0.89    0.42
   3   8  -1    0.53    0.50
  -3   8   1    0.66    0.42
  -3   8   1   -0.20    0.30
   3   8  -1    0.21    0.33
   3   8  -1    0.03    0.30
   3   8  -1    0.53    0.50
  -2  -8   1   86.81    2.93
   2  -8  -1   91.66    3.03
   2  -8  -1   91.11    3.47
  -2  -8   1   88.71    3.36
   2   8  -1   92.35    3.12
   2   8  -1   88.03    4.56
  -2   8   1   88.63    3.37
  -2   8   1   91.84    4.72
   2   8  -1   88.03    4.56
  -2   8   1   91.84    4.71
  -2   8   1   87.64    3.11
   2   8  -1   91.08    3.37
  -1  -8   1    6.62    0.94
   1  -8  -1    5.77    0.69
   1  -8  -1    5.22    0.87
  -1  -8   1    6.33    0.72
  -1   8   1    3.32    1.01
   1   8  -1    6.86    0.82
  -1   8   1    6.62    0.80
  -1   8   1    3.32    1.01
   1   8  -1    4.17    1.12
  -1   8   1    6.03    0.87
   1   8  -1    6.99    0.92
   1   8  -1    4.17    1.12
   0  -8  -1   -0.14    0.31
   0  -8   1    0.46    0.32
   0  -8  -1    0.55    0.30
   0  -8   1    0.80    0.47
   0   8  -1    0.09    0.32
   0   8  -1    0.05    0.36
   0   8   1    0.15    0.34
   0   8  -1    1.40    0.50
   0   8   1    0.15    0.34
   0   8   1    0.62    0.37
   0   8  -1    0.05    0.36
   0   8   1    0.63    0.35
  -1  -8  -1    3.43    0.67
   1  -8   1    4.18    0.64
  -1  -8  -1    3.95    0.54
   1  -8   1    3.62    0.76
  -1   8  -1    5.81    1.34
   1   8   1    3.18    0.97
  -1   8  -1    2.78    0.66
   1   8   1    3.18    0.97
   1   8   1    3.52    0.66
  -1   8  -1    4.31    0.69
   1   8   1    2.81    0.54
  -1   8  -1    5.81    1.34
  -2  -8  -1   22.21    1.40
  -2  -8  -1   22.78    1.13
   2  -8   1   24.87    1.35
   2  -8   1   22.77    1.58
   2   8   1   22.30    1.38
  -2   8  -1   20.81    2.53
  -2   8  -1   23.74    1.39
   2   8   1   23.09    1.29
   2   8   1   23.07    2.41
   2   8   1   23.07    2.41
  -2   8  -1   20.81    2.54
  -2   8  -1   23.32    1.54
   3  -8   1    4.35    0.69
  -3  -8  -1    5.21    0.80
   3  -8   1    6.41    1.00
   3   8   1    5.53    0.70
  -3   8  -1    4.70    1.22
   3   8   1    3.99    1.05
  -3   8  -1    4.28    0.70
   3   8   1    3.99    1.05
  -3   8  -1    4.70    1.23
   3   8   1    6.40    0.85
  -3   8  -1    4.64    0.82
  -4  -8  -1   29.20    1.62
   4  -8   1   29.36    1.62
   4  -8   1   27.69    1.85
  -4   8  -1   33.68    2.83
   4   8   1   32.41    2.44
   4   8   1   29.99    1.47
  -4   8  -1   32.82    1.71
  -4   8  -1   33.68    2.83
  -4   8  -1   28.96    1.81
   4   8   1   32.41    2.44
   4   8   1   31.58    1.66
   5  -8   1   -0.21    0.33
  -5  -8  -1   -0.15    0.28
   5  -8   1   -0.14    0.35
   5   8   1    0.25    0.40
  -5   8  -1   -0.14    0.37
   5   8   1    0.25    0.40
  -5   8  -1   -0.15    0.32
  -5   8  -1    0.02    0.43
   5   8   1   -0.14    0.23
   5   8   1   -0.04    0.32
  -5   8  -1    0.02    0.43
   6  -8   1    7.35    1.14
   6  -8   1    9.09    1.04
  -6  -8  -1    8.49    0.99
   6   8   1    9.75    1.05
   6   8   1    8.53    1.46
  -6   8  -1   11.05    1.95
   6   8   1    8.71    0.88
   6   8   1    8.53    1.46
  -6   8  -1    9.37    1.09
  -6   8  -1   11.05    1.95
  -6   8  -1    7.90    1.13
   7  -8   1   28.61    1.67
   7  -8   1   29.63    2.02
  -7  -8  -1   27.18    1.53
  -7   8  -1   26.64    1.86
  -7   8  -1   32.03    3.50
   7   8   1   26.14    2.20
   7   8   1   26.27    1.55
  -7   8  -1   32.03    3.50
   7   8   1   26.14    2.20
  -7   8  -1   26.81    1.68
   7   8   1   27.63    1.44
   8  -8   1    0.36    0.54
   8  -8   1    0.28    0.47
   8   8   1    1.48    0.45
   8   8   1    0.97    0.62
  -8   8  -1    0.22    0.56
   8   8   1    0.97    0.62
  -8   8  -1    0.53    0.49
  -8   8  -1    0.22    0.56
  -8   8  -1    1.49    0.60
   8   8   1    0.84    0.43
   9  -8   1    7.20    1.04
  -9  -8  -1   10.23    1.10
   9  -8   1    7.62    1.28
  -9   8  -1    8.30    1.13
  -9   8  -1   10.15    1.40
   9   8   1    9.63    1.59
  -9   8  -1    9.48    2.04
  -9   8  -1    9.48    2.04
   9   8   1    8.68    0.93
   9   8   1    9.63    1.59
   9   8   1   10.94    1.14
  10  -8   1    0.79    0.58
  10  -8   1    0.87    0.64
 -10  -8  -1    0.87    0.55
 -10   8  -1    0.63    0.59
  10   8   1    1.20    0.56
  10   8   1    0.32    0.37
  10   8   1    1.20    0.56
  10   8   1    0.47    0.45
  11  -8   1   -0.05    0.50
  11  -8   1    0.31    0.55
  11   8   1    0.58    0.50
  11   8   1   -0.60    0.27
 -11   8  -1   -0.05    0.52
  11   8   1    0.58    0.50
  12  -8   1    2.59    0.92
  12  -8   1    0.83    0.68
  12   8   1    1.51    0.69
  12   8   1    1.51    0.69
  12   8   1    2.27    0.60
 -12   8  -1    2.46    0.89
  13  -8   1    5.36    1.10
  13  -8   1    5.80    1.27
  13   8   1    3.35    1.04
  13   8   1    3.95    0.73
 -13   8  -1    4.99    1.19
  13   8   1    3.35    1.04
  14  -8   1    0.55    0.73
  14  -8   1    0.34    0.74
 -14   8  -1   -0.67    0.60
  14   8   1    0.43    0.52
  14   8   1    0.43    0.52
  14   8   1    0.04    0.45
  15  -8   1   13.38    1.66
  15  -8   1   12.17    1.82
  15   8   1   13.64    1.35
 -15   8  -1   11.65    1.74
  16  -8   1    0.23    0.80
  16   8   1   -0.59    0.40
  16  -9  -1   22.26    2.24
  16   9  -1   20.46    1.59
  15  -9  -1    0.11    0.65
  15  -9  -1    0.32    0.81
  15   9  -1   -0.07    0.49
 -15   9   1    0.39    0.77
  14  -9  -1    5.64    1.34
  14  -9  -1    4.51    1.14
  14   9  -1    4.20    1.33
 -14   9   1    7.83    1.45
  14   9  -1    4.20    1.33
  14   9  -1    6.10    0.98
  13  -9  -1   22.36    2.44
  13  -9  -1   27.13    1.99
  13   9  -1   28.34    1.69
  13   9  -1   17.84    2.61
 -13   9   1   26.49    2.51
  13   9  -1   17.84    2.61
 -12  -9   1    8.55    1.21
  12  -9  -1    6.37    1.32
  12  -9  -1    8.71    1.29
  12   9  -1    8.42    1.24
  12   9  -1    6.62    1.56
 -12   9   1   10.03    1.54
  12   9  -1    6.62    1.56
  12   9  -1    6.93    0.99
  11  -9  -1    2.51    0.91
 -11  -9   1    2.94    0.77
  11  -9  -1    3.07    0.87
  11   9  -1    2.92    0.70
  11   9  -1    3.32    0.79
  11   9  -1    4.18    1.22
  11   9  -1    4.18    1.22
 -11   9   1    3.17    0.94
  10  -9  -1    1.05    0.68
  10  -9  -1    0.09    0.58
 -10  -9   1    0.29    0.51
 -10   9   1    1.46    0.68
 -10   9   1    0.98    0.90
 -10   9   1    1.97    0.76
  10   9  -1    1.30    0.60
  10   9  -1    0.41    0.41
  10   9  -1    0.92    0.59
 -10   9   1    0.98    0.90
  10   9  -1    0.92    0.59
   9  -9  -1    5.24    1.14
   9  -9  -1    6.97    1.04
   9   9  -1    4.46    1.22
  -9   9   1    3.72    0.91
   9   9  -1    4.46    1.22
  -9   9   1    4.49    0.93
  -9   9   1    5.65    1.61
   9   9  -1    4.52    0.77
  -9   9   1    5.66    1.61
   9   9  -1    3.70    0.79
  -8  -9   1   22.52    1.56
   8  -9  -1   23.77    1.91
   8  -9  -1   23.51    1.64
  -8   9   1   17.66    2.76
   8   9  -1   23.32    1.60
   8   9  -1   22.16    2.66
  -8   9   1   17.66    2.76
  -8   9   1   24.11    1.69
   8   9  -1   22.48    1.44
  -8   9   1   19.94    1.95
   8   9  -1   22.16    2.66
   7  -9  -1    2.99    0.73
   7  -9  -1    2.91    0.85
  -7  -9   1    4.08    0.82
  -7   9   1    3.99    0.84
  -7   9   1    2.71    0.75
   7   9  -1    3.45    0.68
  -7   9   1    1.96    1.03
   7   9  -1    4.08    1.13
   7   9  -1    2.11    0.65
  -7   9   1    1.96    1.04
   7   9  -1    4.08    1.13
   6  -9  -1    8.83    1.28
  -6  -9   1   14.62    1.45
   6  -9  -1   10.33    1.14
  -6   9   1    8.29    1.75
   6   9  -1   11.51    1.15
   6   9  -1   13.63    2.07
   6   9  -1   14.24    1.43
  -6   9   1    8.29    1.75
  -6   9   1   10.90    1.22
  -6   9   1    8.56    1.21
   6   9  -1   13.63    2.07
   5  -9  -1    0.35    0.49
  -5  -9   1   -0.13    0.36
   5  -9  -1    0.03    0.41
   5   9  -1    0.27    0.39
  -5   9   1    0.21    0.51
  -5   9   1    0.21    0.51
   5   9  -1   -0.39    0.30
   5   9  -1    0.27    0.39
  -5   9   1   -0.23    0.42
  -5   9   1    0.73    0.49
   5   9  -1    0.17    0.40
   4  -9  -1    3.36    0.83
   4  -9  -1    3.04    0.63
  -4  -9   1    2.12    0.66
  -4   9   1    2.17    0.97
  -4   9   1    1.29    0.56
  -4   9   1    2.17    0.97
   4   9  -1    2.78    0.61
   4   9  -1    2.20    0.90
  -4   9   1    4.24    0.75
   4   9  -1    2.20    0.90
   4   9  -1    2.80    0.67
  -3  -9   1   23.60    1.57
   3  -9  -1   23.46    1.37
   3  -9  -1   23.43    1.68
  -3   9   1   20.63    1.53
   3   9  -1   22.96    1.57
  -3   9   1   20.74    2.66
   3   9  -1   19.05    2.43
   3   9  -1   19.06    2.43
  -3   9   1   24.26    1.49
   3   9  -1   22.58    1.38
  -3   9   1   20.74    2.66
   2  -9  -1    0.09    0.41
   2  -9  -1    0.44    0.39
  -2  -9   1   -0.03    0.31
  -2  -9   1    0.37    0.39
   2   9  -1   -0.22    0.33
   2   9  -1   -0.22    0.33
  -2   9   1    0.30    0.49
   2   9  -1    0.24    0.36
  -2   9   1   -0.05    0.37
  -2   9   1    0.30    0.49
  -2   9   1    0.31    0.39
   2   9  -1    0.31    0.32
  -1  -9   1    7.90    1.08
  -1  -9   1    5.96    0.77
   1  -9  -1    7.07    1.03
   1  -9  -1    6.78    0.79
  -1   9   1    6.68    0.97
   1   9  -1    4.55    1.23
   1   9  -1    4.55    1.23
  -1   9   1    7.96    0.94
   1   9  -1    6.30    0.84
   1   9  -1    7.41    1.03
  -1   9   1    5.11    1.32
  -1   9   1    5.11    1.32
   0  -9  -1   77.56    3.15
   0  -9   1   76.58    2.78
   0  -9   1   79.50    3.27
   0   9   1   74.87    4.30
   0   9  -1   75.70    4.42
   0   9  -1   69.44    3.08
   0   9   1   79.30    2.87
   0   9  -1   75.70    4.42
   0   9   1   74.87    4.30
   0   9   1   74.30    3.06
   0   9  -1   74.06    2.88
   1  -9   1   18.42    1.46
  -1  -9  -1   15.99    1.30
   1  -9   1   18.63    1.23
   1   9   1   18.48    1.22
  -1   9  -1   20.74    1.49
   1   9   1   15.08    1.25
   1   9   1   14.93    2.11
  -1   9  -1   17.87    1.28
  -1   9  -1   16.62    2.31
  -1   9  -1   16.62    2.31
   1   9   1   14.93    2.11
   2  -9   1   34.46    2.06
   2  -9   1   30.21    1.62
  -2  -9  -1   32.10    1.82
   2   9   1   32.62    1.81
  -2   9  -1   29.47    1.69
  -2   9  -1   33.58    1.97
   2   9   1   32.00    1.62
   2   9   1   30.13    3.05
  -2   9  -1   35.83    3.57
  -2   9  -1   35.83    3.56
   2   9   1   30.12    3.05
   3  -9   1    0.35    0.49
  -3  -9  -1   -0.19    0.37
   3  -9   1    0.23    0.39
  -3   9  -1    0.90    0.71
   3   9   1   -0.07    0.33
  -3   9  -1   -0.02    0.36
   3   9   1   -0.07    0.33
  -3   9  -1    0.90    0.71
   3   9   1    0.78    0.40
   3   9   1    0.43    0.35
  -3   9  -1    0.11    0.38
   4  -9   1    1.07    0.58
   4  -9   1    1.86    0.55
  -4  -9  -1    0.94    0.50
   4   9   1    1.98    0.77
   4   9   1    0.83    0.40
  -4   9  -1    0.64    0.69
   4   9   1    0.88    0.46
  -4   9  -1    0.59    0.47
  -4   9  -1    2.26    0.65
  -4   9  -1    0.64    0.69
   4   9   1    1.98    0.77
   5  -9   1    0.60    0.48
   5  -9   1    0.77    0.54
  -5  -9  -1    0.96    0.50
   5   9   1    0.95    0.42
  -5   9  -1    0.38    0.62
   5   9   1    0.33    0.39
  -5   9  -1    0.44    0.45
   5   9   1    0.74    0.56
  -5   9  -1    0.75    0.52
   5   9   1    0.74    0.56
  -5   9  -1    0.38    0.62
   6  -9   1    6.09    0.94
   6  -9   1    5.19    1.04
  -6  -9  -1    5.61    0.88
  -6   9  -1    7.40    1.05
   6   9   1    6.35    1.38
  -6   9  -1    6.03    1.63
  -6   9  -1    5.87    1.07
  -6   9  -1    6.03    1.63
   6   9   1    6.61    0.83
   6   9   1    5.88    0.90
   6   9   1    6.35    1.38
   7  -9   1   -0.13    0.43
  -7  -9  -1    0.43    0.46
   7  -9   1    0.09    0.47
  -7   9  -1    0.50    0.65
  -7   9  -1    0.24    0.51
   7   9   1    0.56    0.44
  -7   9  -1    0.50    0.65
   7   9   1    0.12    0.37
  -7   9  -1    0.53    0.48
   7   9   1    0.03    0.29
   7   9   1    0.12    0.37
   8  -9   1    0.07    0.48
   8  -9   1    0.03    0.49
  -8   9  -1    0.17    0.47
   8   9   1    0.21    0.37
  -8   9  -1   -0.08    0.45
   8   9   1    0.21    0.37
   8   9   1    0.09    0.38
   8   9   1   -0.07    0.33
  -8   9  -1   -0.20    0.49
  -8   9  -1    0.17    0.47
  -9  -9  -1    0.86    0.53
   9  -9   1    1.08    0.71
   9  -9   1    1.19    0.67
   9   9   1    0.53    0.45
  -9   9  -1    1.00    0.73
   9   9   1    0.85    0.45
  -9   9  -1    1.00    0.73
   9   9   1    0.53    0.45
  -9   9  -1    0.97    0.65
   9   9   1    1.34    0.55
  -9   9  -1    2.21    0.78
  10  -9   1    0.05    0.58
  10  -9   1   -0.26    0.52
 -10   9  -1    0.71    0.66
  10   9   1    0.27    0.39
  10   9   1    0.99    0.52
  10   9   1    0.09    0.35
  10   9   1    0.09    0.35
  11  -9   1    4.10    0.97
  11  -9   1    1.49    0.82
 -11   9  -1    1.57    0.85
  11   9   1    1.41    0.70
  11   9   1    1.97    0.58
  11   9   1    1.41    0.70
  12  -9   1    2.36    0.88
  12  -9   1    1.11    0.79
  12   9   1    1.61    0.74
 -12   9  -1    1.93    0.87
  12   9   1    1.91    0.59
  12   9   1    1.61    0.74
  13  -9   1    0.86    0.78
  13  -9   1    1.22    0.85
  13   9   1    0.96    0.55
  13   9   1    0.45    0.57
 -13   9  -1    1.57    0.86
  13   9   1    0.45    0.57
  14  -9   1   11.00    1.56
  14  -9   1   11.28    1.78
  14   9   1    9.54    1.15
 -14   9  -1   10.58    1.70
  15  -9   1    1.82    0.93
  15   9   1    0.56    0.53
  15 -10  -1    1.68    1.02
  15  10  -1    3.10    0.82
  14 -10  -1    1.80    0.96
  14 -10  -1    1.75    0.96
 -14  10   1    1.21    0.81
  14  10  -1    2.48    0.75
  13 -10  -1   10.06    1.51
  13 -10  -1   10.21    1.76
  13  10  -1    8.11    1.13
  13  10  -1    7.54    1.77
 -13  10   1   12.13    1.83
  13  10  -1    7.54    1.77
  12 -10  -1    3.60    1.11
  12 -10  -1    4.50    1.09
  12  10  -1    2.14    1.07
  12  10  -1    2.14    1.07
  12  10  -1    3.46    0.80
 -12  10   1    3.46    1.10
 -11 -10   1    9.66    1.28
  11 -10  -1    8.88    1.29
  11 -10  -1    9.41    1.61
 -11  10   1   11.35    1.64
  11  10  -1    6.98    1.66
  11  10  -1   10.28    1.34
  11  10  -1    6.98    1.66
  11  10  -1   12.42    1.29
 -10 -10   1   -0.61    0.48
  10 -10  -1   -0.10    0.59
  10 -10  -1    0.04    0.57
 -10  10   1    0.47    0.63
  10  10  -1    0.43    0.46
 -10  10   1    0.43    0.62
  10  10  -1   -0.52    0.50
 -10  10   1    0.36    0.70
 -10  10   1    0.47    0.63
  10  10  -1    0.11    0.54
  10  10  -1    0.11    0.54
   9 -10  -1    0.26    0.59
   9 -10  -1   -0.32    0.55
  -9  10   1    0.23    0.66
  -9  10   1   -0.08    0.48
   9  10  -1    0.09    0.55
   9  10  -1    0.01    0.45
  -9  10   1   -0.08    0.48
   9  10  -1   -0.31    0.39
   9  10  -1    0.09    0.55
  -9  10   1    0.20    0.50
   8 -10  -1    0.65    0.65
  -8 -10   1    0.46    0.57
   8 -10  -1    1.21    0.66
   8  10  -1    1.89    0.79
   8  10  -1    0.14    0.45
   8  10  -1    1.59    0.64
  -8  10   1    0.62    0.66
  -8  10   1    1.98    0.76
  -8  10   1    0.58    0.71
  -8  10   1    0.58    0.71
   8  10  -1    1.89    0.79
   7 -10  -1   12.00    1.29
  -7 -10   1   11.75    1.36
   7 -10  -1   13.42    1.67
  -7  10   1   11.01    1.34
   7  10  -1   11.70    1.35
  -7  10   1   12.33    2.33
   7  10  -1   10.72    1.94
   7  10  -1    9.59    1.12
  -7  10   1   10.26    1.42
  -7  10   1   12.33    2.33
   7  10  -1   10.72    1.94
   6 -10  -1   10.60    1.49
   6 -10  -1   13.92    1.39
  -6 -10   1   10.22    1.27
   6  10  -1    9.46    1.23
   6  10  -1    8.96    1.75
   6  10  -1    8.96    1.75
  -6  10   1   11.67    2.32
  -6  10   1   11.44    1.45
  -6  10   1   10.88    1.30
   6  10  -1   13.96    1.15
  -6  10   1   11.67    2.32
   5 -10  -1   13.15    1.60
   5 -10  -1   12.36    1.28
  -5 -10   1   14.04    1.49
   5  10  -1   12.47    2.09
   5  10  -1   14.45    1.52
  -5  10   1   16.51    2.61
   5  10  -1   12.47    2.09
  -5  10   1   10.38    1.24
  -5  10   1   10.85    1.38
   5  10  -1   14.16    1.32
  -5  10   1   16.51    2.61
  -4 -10   1    4.54    0.94
   4 -10  -1    6.97    0.93
   4 -10  -1    6.94    1.15
  -4  10   1    6.42    0.97
  -4  10   1    8.98    1.93
   4  10  -1    5.86    0.88
   4  10  -1    8.09    1.68
   4  10  -1    6.36    1.02
  -4  10   1    8.98    1.93
  -4  10   1    6.53    1.11
   4  10  -1    8.09    1.68
  -3 -10   1   14.38    1.52
   3 -10  -1   14.64    1.63
   3  10  -1   11.88    1.37
   3  10  -1   10.36    1.12
  -3  10   1   12.13    2.11
   3  10  -1   13.49    2.23
   3  10  -1   13.49    2.23
  -3  10   1   12.13    2.11
  -3  10   1   16.18    1.65
  -3  10   1   11.24    1.21
   2 -10  -1   60.60    2.95
  -2 -10   1   62.92    2.93
   2  10  -1   59.68    2.85
   2  10  -1   60.27    4.09
  -2  10   1   64.64    2.70
   2  10  -1   60.27    4.08
  -2  10   1   60.89    4.16
  -2  10   1   63.40    2.94
   2  10  -1   65.00    2.67
  -2  10   1   60.88    4.17
  -1 -10   1    0.57    0.51
   1 -10  -1    0.88    0.56
   1  10  -1   -0.17    0.49
   1  10  -1    0.04    0.39
  -1  10   1    0.07    0.50
  -1  10   1    0.07    0.50
   1  10  -1    0.58    0.45
  -1  10   1    1.01    0.48
  -1  10   1    0.68    0.49
   1  10  -1   -0.17    0.49
   0 -10   1    4.39    0.91
   0 -10  -1    6.95    1.07
   0  10  -1    5.37    0.96
   0  10  -1    6.58    1.55
   0  10  -1    4.48    0.80
   0  10   1    4.25    1.20
   0  10   1    4.84    0.81
   0  10  -1    6.58    1.55
   0  10   1    5.33    0.93
   0  10   1    4.25    1.20
   1 -10   1    0.20    0.40
   1 -10   1   -0.14    0.43
  -1 -10  -1   -0.36    0.37
  -1  10  -1   -0.51    0.34
   1  10   1    0.27    0.49
  -1  10  -1   -0.41    0.42
   1  10   1    0.27    0.49
  -1  10  -1   -0.41    0.42
   1  10   1   -0.23    0.34
  -1  10  -1   -0.40    0.39
   1  10   1    0.24    0.36
  -2 -10  -1   19.93    1.51
   2 -10   1   16.98    1.27
   2 -10   1   15.92    1.70
  -2  10  -1   14.63    1.59
   2  10   1   17.13    1.39
  -2  10  -1   16.26    2.48
  -2  10  -1   16.26    2.48
   2  10   1   18.87    2.48
  -2  10  -1   18.02    1.43
   2  10   1   19.94    1.35
   2  10   1   18.87    2.48
   3 -10   1    1.21    0.61
   3 -10   1   -0.11    0.40
  -3 -10  -1    1.09    0.56
  -3  10  -1    2.00    0.99
   3  10   1    1.78    0.82
   3  10   1    1.13    0.51
  -3  10  -1    2.00    0.99
   3  10   1    1.78    0.82
   3  10   1    0.17    0.36
  -3  10  -1    1.28    0.58
  -3  10  -1    0.86    0.51
   4 -10   1   11.96    1.25
  -4 -10  -1   15.65    1.51
   4 -10   1   11.29    1.51
  -4  10  -1   10.10    2.01
  -4  10  -1   11.40    1.30
  -4  10  -1   10.10    2.01
   4  10   1   13.83    2.13
   4  10   1   13.35    1.39
   4  10   1   13.83    2.13
   4  10   1   13.20    1.23
  -4  10  -1   12.24    1.51
   5 -10   1    5.94    1.10
  -5 -10  -1    6.18    0.98
   5 -10   1    5.70    0.92
  -5  10  -1    5.84    1.56
   5  10   1    6.50    1.42
  -5  10  -1    5.84    1.56
  -5  10  -1    5.82    1.07
  -5  10  -1    6.40    1.04
   5  10   1    6.60    0.89
   5  10   1    5.95    0.95
   5  10   1    6.50    1.42
   6 -10   1    0.94    0.64
   6 -10   1    1.24    0.63
  -6 -10  -1    0.73    0.52
   6  10   1    0.06    0.44
   6  10   1    0.06    0.44
  -6  10  -1    0.19    0.50
  -6  10  -1    0.28    0.68
  -6  10  -1    0.91    0.60
   6  10   1    0.21    0.42
  -6  10  -1    0.28    0.68
   6  10   1    0.22    0.39
   7 -10   1    3.36    0.96
  -7 -10  -1    3.60    0.80
   7 -10   1    4.24    0.91
   7  10   1    2.89    0.97
   7  10   1    2.89    0.97
  -7  10  -1    3.14    1.23
  -7  10  -1    4.54    1.03
  -7  10  -1    4.08    0.92
  -7  10  -1    3.14    1.23
   7  10   1    4.66    0.76
   7  10   1    5.35    0.95
   8 -10   1    0.16    0.60
   8 -10   1    0.40    0.57
  -8 -10  -1    0.63    0.57
   8  10   1    0.68    0.45
  -8  10  -1    0.87    0.79
  -8  10  -1    0.01    0.52
   8  10   1    0.79    0.52
   8  10   1    0.79    0.52
  -8  10  -1    0.87    0.79
   8  10   1    0.59    0.50
  -8  10  -1    1.50    0.75
   9 -10   1   -0.17    0.59
   9 -10   1   -0.11    0.50
   9  10   1   -0.20    0.42
   9  10   1   -0.22    0.30
   9  10   1   -0.22    0.30
  -9  10  -1    0.20    0.53
   9  10   1   -0.13    0.36
  10 -10   1    0.19    0.63
  10 -10   1    0.17    0.61
  10  10   1   -0.56    0.33
  10  10   1    0.39    0.44
 -10  10  -1   -0.36    0.52
  10  10   1    0.39    0.44
  11 -10   1    3.87    1.11
  11 -10   1   10.30    1.44
  11  10   1    9.13    1.10
  11  10   1    7.49    1.66
  11  10   1    7.50    1.66
 -11  10  -1    7.95    1.45
  12 -10   1    1.29    0.84
  12 -10   1    3.24    1.06
  12  10   1    0.86    0.70
  12  10   1    1.34    0.58
 -12  10  -1    2.30    0.98
  12  10   1    0.86    0.70
  13 -10   1   15.23    1.82
  13 -10   1   12.99    1.95
  13  10   1   14.07    1.40
 -13  10  -1   17.46    2.18
  14 -10   1    6.76    1.35
  14  10   1    8.19    1.12
  14  11  -1    0.56    0.56
  13  11  -1    0.00    0.49
  12 -11  -1    0.20    0.59
 -12  11   1    1.66    0.86
  12  11  -1    0.92    0.63
  11 -11  -1    0.24    0.61
  11  11  -1    0.64    0.70
  11  11  -1    0.85    0.56
 -11  11   1    0.24    0.59
  11  11  -1    0.64    0.70
 -10 -11   1    0.00    0.61
  10 -11  -1    0.23    0.64
  10  11  -1   -0.03    0.58
  10  11  -1   -0.03    0.59
 -10  11   1    0.14    0.56
 -10  11   1    1.04    0.83
  10  11  -1    1.11    0.69
  10  11  -1   -0.24    0.45
   9 -11  -1   23.51    2.45
  -9 -11   1   18.73    1.79
   9  11  -1   19.18    1.48
  -9  11   1   14.42    2.67
  -9  11   1   18.94    2.12
   9  11  -1   19.29    2.75
   9  11  -1   18.55    1.82
  -9  11   1   20.32    1.94
  -9  11   1   14.43    2.67
   9  11  -1   19.29    2.75
  -8 -11   1    4.09    0.94
   8 -11  -1    1.77    0.87
  -8  11   1    2.31    0.86
   8  11  -1    1.25    0.64
   8  11  -1    0.87    0.74
   8  11  -1    0.87    0.73
  -8  11   1   -0.08    0.75
   8  11  -1    2.43    0.68
  -8  11   1   -0.08    0.75
  -8  11   1    2.16    0.83
   7 -11  -1   11.24    1.66
  -7 -11   1    9.40    1.32
   7  11  -1   12.49    1.34
   7  11  -1   10.14    1.37
   7  11  -1   12.45    2.22
   7  11  -1   12.45    2.21
  -7  11   1   10.34    2.30
  -7  11   1   13.70    1.57
  -7  11   1   10.21    1.53
  -7  11   1   10.34    2.30
  -6 -11   1    0.66    0.61
   6 -11  -1   -0.01    0.55
   6  11  -1    0.31    0.50
  -6  11   1    1.47    0.93
   6  11  -1    0.27    0.56
  -6  11   1   -0.19    0.60
  -6  11   1   -0.40    0.37
  -6  11   1    1.47    0.93
   6  11  -1    0.27    0.56
   6  11  -1    0.51    0.48
  -5 -11   1   -0.34    0.46
   5 -11  -1   -0.17    0.56
   5  11  -1    0.35    0.48
  -5  11   1    0.27    0.56
   5  11  -1   -0.06    0.40
  -5  11   1    0.24    0.46
  -5  11   1   -0.30    0.49
  -5  11   1   -0.30    0.49
   5  11  -1    0.38    0.52
   5  11  -1    0.38    0.52
   4 -11  -1    0.23    0.60
  -4 -11   1    0.19    0.52
  -4  11   1    0.74    0.55
  -4  11   1    0.58    0.77
  -4  11   1    0.58    0.77
  -4  11   1    1.01    0.62
   4  11  -1    0.94    0.56
   4  11  -1    0.75    0.72
   4  11  -1    0.75    0.72
   4  11  -1    1.19    0.57
  -3 -11   1    0.02    0.49
   3 -11  -1    0.25    0.53
  -3  11   1    0.20    0.63
  -3  11   1    1.03    0.59
  -3  11   1    0.20    0.63
   3  11  -1    0.32    0.58
  -3  11   1   -0.12    0.43
   3  11  -1    0.32    0.58
   3  11  -1    0.13    0.42
   3  11  -1   -0.34    0.38
  -2 -11   1    9.14    1.30
   2 -11  -1    8.63    1.32
   2  11  -1    8.80    1.90
  -2  11   1   10.64    1.40
  -2  11   1    9.47    1.94
   2  11  -1   10.82    1.24
  -2  11   1   10.78    1.27
  -2  11   1    9.47    1.94
   2  11  -1    8.80    1.90
   2  11  -1    8.80    1.27
  -1 -11   1    0.63    0.60
   1 -11  -1    0.50    0.58
  -1  11   1    1.53    0.83
   1  11  -1    0.19    0.53
  -1  11   1    1.53    0.83
  -1  11   1   -0.07    0.45
   1  11  -1   -0.36    0.41
   1  11  -1    0.19    0.53
  -1  11   1    0.24    0.44
   1  11  -1    0.43    0.50
   0 -11   1   30.39    2.09
   0 -11  -1   28.96    2.00
   0  11  -1   26.61    3.37
   0  11   1   30.30    3.47
   0  11  -1   32.95    2.12
   0  11  -1   31.92    1.89
   0  11   1   30.30    3.47
   0  11  -1   26.61    3.37
   0  11   1   30.09    1.81
   0  11   1   26.74    1.88
  -1 -11  -1    0.79    0.64
   1 -11   1    0.52    0.58
   1  11   1    0.58    0.50
  -1  11  -1    0.44    0.50
   1  11   1   -0.14    0.48
  -1  11  -1    0.50    0.52
  -1  11  -1    1.70    0.91
   1  11   1   -0.14    0.48
  -1  11  -1    1.70    0.91
   1  11   1    0.75    0.51
  -2 -11  -1   11.72    1.41
   2 -11   1   14.12    1.67
  -2  11  -1   13.25    1.59
   2  11   1   15.18    2.39
   2  11   1   13.17    1.32
  -2  11  -1   17.64    2.78
  -2  11  -1   17.63    2.78
  -2  11  -1   13.06    1.41
   2  11   1   15.18    2.39
   2  11   1   11.44    1.36
   3 -11   1    0.48    0.57
  -3 -11  -1   -0.24    0.44
  -3  11  -1   -0.36    0.45
   3  11   1    0.26    0.49
  -3  11  -1   -0.12    0.55
   3  11   1   -0.17    0.38
   3  11   1    0.26    0.49
   3  11   1   -0.25    0.36
  -3  11  -1   -0.12    0.55
  -3  11  -1   -0.21    0.39
   4 -11   1    0.89    0.62
  -4 -11  -1    0.32    0.53
   4  11   1    0.47    0.60
  -4  11  -1    0.32    0.68
  -4  11  -1    1.23    0.67
  -4  11  -1    0.32    0.68
  -4  11  -1   -0.25    0.42
   4  11   1    0.83    0.53
   4  11   1    0.47    0.60
   4  11   1    1.15    0.55
   5 -11   1    4.86    1.12
  -5 -11  -1    4.45    0.95
   5 -11   1    3.99    0.89
   5  11   1    2.90    0.67
   5  11   1    5.32    1.45
  -5  11  -1    3.16    0.89
  -5  11  -1    0.97    0.95
  -5  11  -1    0.97    0.95
   5  11   1    5.32    1.45
  -5  11  -1    2.98    0.88
   5  11   1    4.20    0.89
   6 -11   1    0.31    0.57
   6 -11   1    0.53    0.66
  -6 -11  -1   -0.75    0.41
   6  11   1    0.28    0.51
  -6  11  -1   -0.23    0.56
  -6  11  -1    0.19    0.69
  -6  11  -1   -0.40    0.44
   6  11   1    0.28    0.51
   6  11   1    0.04    0.45
  -6  11  -1    0.19    0.69
   6  11   1   -0.37    0.37
   7 -11   1    5.41    1.08
  -7 -11  -1    4.91    0.98
   7 -11   1    4.85    1.20
   7  11   1    4.72    1.31
  -7  11  -1    1.89    1.00
   7  11   1    5.68    1.00
  -7  11  -1    1.89    1.00
   7  11   1    4.76    0.82
   7  11   1    4.72    1.31
  -7  11  -1    5.34    1.08
  -7  11  -1    4.92    1.13
   8 -11   1   -0.12    0.63
   8 -11   1    0.59    0.70
  -8 -11  -1    0.65    0.58
   8  11   1    0.51    0.54
  -8  11  -1    0.05    0.72
  -8  11  -1    0.50    0.64
  -8  11  -1    0.05    0.72
   8  11   1   -0.24    0.40
   8  11   1    0.51    0.54
  -8  11  -1   -0.56    0.62
   8  11   1    0.08    0.48
   9 -11   1    6.28    1.19
   9 -11   1    6.02    1.32
   9  11   1    6.41    0.95
   9  11   1    7.44    1.59
  -9  11  -1    3.76    1.09
   9  11   1    7.44    1.59
  10 -11   1    0.66    0.75
  10 -11   1    0.16    0.67
  10  11   1    0.54    0.58
  10  11   1    0.46    0.50
 -10  11  -1   -0.35    0.61
  10  11   1    0.54    0.58
  11 -11   1    8.76    1.44
  11 -11   1   10.04    1.70
  11  11   1    9.31    1.16
  11  11   1    8.07    1.70
  11  11   1    8.07    1.70
 -11  11  -1    9.07    1.59
  12 -11   1    3.20    1.10
  12 -11   1    1.81    0.96
  12  11   1    1.90    0.67
 -12  11  -1    1.89    0.91
  13 -11   1    1.68    0.99
  13  11   1    1.30    0.63
  13  12  -1    0.93    0.65
  12  12  -1    2.28    0.82
 -11  12   1    8.32    1.54
  11  12  -1    7.67    1.14
  10 -12  -1   15.26    2.09
  10  12  -1   12.83    1.45
 -10  12   1   12.00    1.78
   9 -12  -1    9.76    1.64
  -9 -12   1    8.53    1.36
   9  12  -1    8.49    1.97
  -9  12   1    7.61    2.12
   9  12  -1   11.01    1.53
  -9  12   1    7.61    2.12
   9  12  -1    8.49    1.97
  -9  12   1    6.52    1.35
   9  12  -1    9.87    1.29
  -8 -12   1   13.21    1.66
   8 -12  -1   16.08    2.06
   8  12  -1   13.95    1.49
  -8  12   1   15.66    2.89
   8  12  -1   14.90    2.50
   8  12  -1   16.95    1.87
   8  12  -1   14.90    2.50
  -8  12   1   15.66    2.89
  -8  12   1   19.81    2.01
  -8  12   1   18.61    2.11
  -7 -12   1   -0.12    0.61
   7 -12  -1    0.15    0.70
  -7  12   1    1.05    0.92
   7  12  -1    0.13    0.58
  -7  12   1    0.14    0.69
  -7  12   1    1.05    0.91
  -7  12   1   -0.38    0.54
   7  12  -1    0.13    0.58
   7  12  -1   -0.47    0.45
   7  12  -1    0.29    0.53
  -6 -12   1    0.42    0.64
   6 -12  -1    0.78    0.75
   6  12  -1    0.10    0.59
   6  12  -1    0.54    0.60
   6  12  -1    0.10    0.59
  -6  12   1    3.37    1.38
   6  12  -1    0.70    0.57
  -6  12   1    3.37    1.38
  -6  12   1    0.06    0.63
  -6  12   1    0.35    0.63
  -5 -12   1    0.61    0.69
   5 -12  -1    1.65    0.85
  -5  12   1    0.79    0.87
  -5  12   1    1.94    0.81
  -5  12   1    1.07    0.63
   5  12  -1    0.99    0.76
   5  12  -1    0.99    0.76
  -5  12   1    0.79    0.88
   5  12  -1   -0.04    0.52
   5  12  -1    0.23    0.54
   4 -12  -1    0.21    0.62
  -4 -12   1    0.08    0.57
  -4  12   1    0.43    0.65
   4  12  -1   -0.11    0.53
   4  12  -1    0.09    0.47
   4  12  -1    0.40    0.49
  -4  12   1   -0.48    0.51
  -4  12   1    0.15    0.53
   4  12  -1   -0.11    0.53
  -4  12   1    0.43    0.65
  -3 -12   1    2.72    0.91
   3 -12  -1    2.93    0.88
  -3  12   1    1.91    1.02
   3  12  -1    3.40    0.84
   3  12  -1    3.48    1.26
   3  12  -1    3.48    1.26
  -3  12   1    2.67    0.83
  -3  12   1    1.91    1.02
  -3  12   1    3.15    0.90
   3  12  -1    3.69    0.96
   2 -12  -1   13.43    1.70
  -2 -12   1   18.57    1.93
  -2  12   1   16.04    2.74
   2  12  -1   14.74    1.50
  -2  12   1   16.04    2.74
   2  12  -1   15.46    2.58
   2  12  -1   15.46    2.57
  -2  12   1   16.87    1.83
   2  12  -1   17.11    1.83
  -2  12   1   13.67    1.48
   1 -12  -1   11.97    1.58
  -1 -12   1    9.24    1.41
   1  12  -1   10.33    2.18
   1  12  -1    8.86    1.22
   1  12  -1   11.05    1.47
  -1  12   1   12.77    1.46
  -1  12   1    7.30    1.81
  -1  12   1    7.30    1.81
  -1  12   1    8.77    1.34
   1  12  -1   10.33    2.18
   0 -12  -1   -0.34    0.52
   0 -12   1    0.50    0.68
   0  12   1    0.78    0.56
   0  12   1    0.74    0.77
   0  12   1   -0.49    0.43
   0  12  -1   -0.62    0.44
   0  12  -1    0.49    0.57
   0  12  -1    0.80    0.61
   0  12   1    0.74    0.77
   0  12  -1   -0.62    0.44
  -1 -12  -1    2.23    0.85
   1 -12   1    1.98    0.83
   1  12   1    0.27    0.53
   1  12   1    3.23    1.18
  -1  12  -1    2.84    1.19
  -1  12  -1    2.84    1.19
  -1  12  -1    2.38    0.81
   1  12   1    2.30    0.74
  -1  12  -1    2.18    0.80
   1  12   1    3.23    1.18
   2 -12   1   10.16    1.50
  -2 -12  -1   10.74    1.46
  -2  12  -1    8.63    1.99
  -2  12  -1    9.27    1.39
   2  12   1   12.14    2.21
   2  12   1    8.36    1.30
   2  12   1   12.14    2.21
  -2  12  -1    9.61    1.31
   2  12   1    8.22    1.13
  -2  12  -1    8.63    1.99
  -3 -12  -1    1.74    0.79
   3 -12   1    1.22    0.76
   3  12   1    1.57    0.64
   3  12   1    2.78    1.04
   3  12   1    3.89    0.82
  -3  12  -1    2.69    1.20
   3  12   1    2.78    1.04
  -3  12  -1    1.49    0.77
  -3  12  -1    2.69    1.20
  -3  12  -1    1.77    0.78
   4 -12   1    1.20    0.78
  -4 -12  -1    1.17    0.70
   4  12   1    1.08    0.83
  -4  12  -1    4.50    1.58
   4  12   1    1.29    0.63
  -4  12  -1    1.80    0.75
  -4  12  -1    0.77    0.67
   4  12   1    1.08    0.83
  -4  12  -1    4.50    1.58
   4  12   1    2.52    0.73
   5 -12   1    2.16    0.88
  -5 -12  -1    0.41    0.59
   5  12   1    0.87    0.63
  -5  12  -1    0.66    0.78
   5  12   1    0.55    0.65
  -5  12  -1    1.49    0.80
   5  12   1    0.55    0.65
  -5  12  -1    0.66    0.78
   5  12   1    1.48    0.59
  -5  12  -1    1.15    0.72
  -6 -12  -1   17.83    1.79
   6 -12   1   15.18    1.94
   6  12   1   15.40    1.63
  -6  12  -1   20.30    2.00
  -6  12  -1   19.18    2.10
  -6  12  -1   20.36    3.25
   6  12   1   18.64    1.45
   6  12   1   14.27    2.37
   6  12   1   14.27    2.37
  -6  12  -1   20.36    3.25
   7 -12   1    2.92    1.09
  -7  12  -1    1.88    1.12
  -7  12  -1    4.06    1.11
   7  12   1    2.57    0.72
  -7  12  -1    1.88    1.12
   7  12   1    1.75    1.03
   7  12   1    2.47    0.81
  -7  12  -1    1.58    0.82
   7  12   1    1.75    1.03
   8 -12   1   16.93    2.11
   8  12   1   22.14    1.60
   8  12   1   21.43    2.86
   8  12   1   21.43    2.86
  -8  12  -1   22.32    2.32
   9 -12   1    0.40    0.70
   9  12   1    1.01    0.73
   9  12   1    1.01    0.73
  -9  12  -1    2.15    0.87
   9  12   1    2.17    0.72
  10 -12   1    3.22    1.10
 -10  12  -1    4.25    1.15
  10  12   1    3.47    0.81
  11  12   1    2.30    0.74
  12  12   1    1.43    0.66
  11  13  -1    0.73    0.67
  10  13  -1    1.26    0.70
   9  13  -1   12.12    1.46
  -9  13   1   10.75    1.79
   8 -13  -1    2.72    1.03
  -8 -13   1    3.13    1.03
  -8  13   1    3.54    1.28
   8  13  -1    5.18    1.17
  -8  13   1    3.18    1.01
  -8  13   1    2.65    1.05
   8  13  -1    2.91    0.82
  -8  13   1    3.54    1.29
   7 -13  -1    9.68    1.66
  -7 -13   1   13.39    1.70
  -7  13   1   13.47    2.82
  -7  13   1   11.80    1.69
   7  13  -1    9.51    2.17
   7  13  -1   10.48    1.34
  -7  13   1   13.47    2.83
   7  13  -1    9.51    2.16
  -7  13   1    7.04    1.37
   7  13  -1   10.14    1.47
   6 -13  -1   -0.53    0.67
  -6 -13   1    1.13    0.83
   6  13  -1    0.99    0.88
  -6  13   1    0.01    0.69
  -6  13   1    0.01    0.70
  -6  13   1    1.16    0.82
   6  13  -1    0.99    0.88
   6  13  -1    0.32    0.56
   6  13  -1    0.01    0.62
  -6  13   1    0.45    0.66
   5 -13  -1    3.10    1.06
  -5 -13   1    3.66    1.05
   5  13  -1    6.07    1.17
  -5  13   1    3.92    1.52
  -5  13   1    5.01    1.17
   5  13  -1    7.01    1.15
  -5  13   1    3.92    1.52
   5  13  -1    7.60    1.96
  -5  13   1    2.42    0.93
   5  13  -1    7.60    1.96
   4 -13  -1    4.97    1.22
  -4 -13   1    8.72    1.41
  -4  13   1    5.02    1.12
   4  13  -1    6.83    1.11
   4  13  -1    5.17    1.11
  -4  13   1    6.78    1.27
   4  13  -1    6.88    1.83
  -4  13   1    7.32    2.07
   4  13  -1    6.88    1.83
  -4  13   1    7.32    2.07
   3 -13  -1    4.20    1.15
  -3 -13   1    4.89    1.14
   3  13  -1    2.97    1.28
   3  13  -1    3.79    0.98
  -3  13   1    4.19    1.45
  -3  13   1    2.90    0.93
  -3  13   1    4.87    1.09
   3  13  -1    2.97    1.28
  -3  13   1    4.19    1.45
   3  13  -1    4.90    1.00
  -2 -13   1    1.76    0.87
   2 -13  -1    2.05    0.91
   2  13  -1    0.47    0.63
  -2  13   1   -0.39    0.59
  -2  13   1    1.06    0.68
   2  13  -1    0.55    0.61
  -2  13   1    0.32    0.77
  -2  13   1    0.32    0.77
   2  13  -1    0.16    0.65
   2  13  -1    0.16    0.65
   1 -13  -1    0.71    0.74
  -1 -13   1   -0.17    0.62
   1  13  -1    0.47    0.57
  -1  13   1   -0.23    0.56
   1  13  -1    1.46    0.99
   1  13  -1    0.13    0.63
   1  13  -1    1.46    0.99
  -1  13   1    0.05    0.56
  -1  13   1    0.18    0.69
  -1  13   1    0.18    0.69
   0 -13   1   17.16    1.99
   0 -13  -1   12.08    1.65
   0  13   1   18.26    2.91
   0  13   1   18.26    2.91
   0  13  -1   17.78    2.02
   0  13  -1   16.76    1.73
   0  13   1   12.52    1.51
   0  13  -1   15.14    2.81
   0  13   1   15.16    1.78
   0  13  -1   15.14    2.81
   1 -13   1    1.49    0.85
  -1 -13  -1    2.80    0.95
   1  13   1    2.61    0.82
  -1  13  -1    2.77    1.27
  -1  13  -1    2.77    1.27
   1  13   1    4.57    1.55
  -1  13  -1    2.65    0.87
   1  13   1    2.09    0.79
  -1  13  -1    2.52    0.88
   1  13   1    4.57    1.55
   2 -13   1    3.91    1.12
  -2 -13  -1    3.89    1.08
  -2  13  -1    3.23    1.33
   2  13   1    1.04    0.87
  -2  13  -1    3.58    1.00
   2  13   1    1.04    0.87
  -2  13  -1    3.23    1.33
   2  13   1    3.74    0.96
   2  13   1    3.73    0.89
  -2  13  -1    4.56    1.11
  -3 -13  -1   -0.22    0.62
   3 -13   1   -0.06    0.59
  -3  13  -1   -0.32    0.47
   3  13   1   -0.48    0.48
   3  13   1   -0.22    0.52
   3  13   1    0.24    0.55
  -3  13  -1   -0.22    0.63
  -3  13  -1    0.43    0.69
   3  13   1   -0.22    0.52
  -3  13  -1    0.43    0.69
   4 -13   1   -0.07    0.66
  -4 -13  -1    0.64    0.72
  -4  13  -1    0.78    0.96
   4  13   1   -0.20    0.56
  -4  13  -1    0.12    0.71
   4  13   1   -0.20    0.56
  -4  13  -1    1.37    0.75
   4  13   1    1.42    0.72
   4  13   1    0.36    0.54
  -4  13  -1    0.78    0.96
   5 -13   1    1.24    0.88
  -5 -13  -1    3.08    0.98
  -5  13  -1    2.58    0.94
   5  13   1    3.21    1.24
  -5  13  -1    2.68    1.38
  -5  13  -1    2.58    1.01
  -5  13  -1    2.68    1.38
   5  13   1    3.21    1.24
   5  13   1    1.84    0.70
   5  13   1    2.58    0.88
   6 -13   1    1.15    0.76
  -6  13  -1    0.62    0.82
  -6  13  -1    0.62    0.82
  -6  13  -1   -0.21    0.59
  -6  13  -1    0.38    0.81
   6  13   1    0.65    0.75
   6  13   1    0.61    0.58
   6  13   1    0.65    0.75
   7 -13   1   17.38    2.22
  -7  13  -1   18.93    2.02
  -7  13  -1   15.55    2.03
   7  13   1   15.71    1.61
   8 -13   1    0.11    0.67
  -8  13  -1    0.12    0.57
   8  13   1   -0.04    0.53
   9  13   1   12.32    1.44
  10  13   1    1.94    0.76
   9  14  -1    0.22    0.68
  -8  14   1    0.00    0.89
   8  14  -1    0.08    0.65
   7  14  -1    7.49    1.24
  -7  14   1    8.19    1.55
  -7  14   1    4.58    1.72
  -7  14   1    4.58    1.72
  -6 -14   1    2.61    1.08
   6 -14  -1    3.55    1.17
  -6  14   1    1.63    1.20
  -6  14   1    2.02    0.93
  -6  14   1    1.63    1.20
   6  14  -1    4.21    0.99
   6  14  -1    3.32    1.07
  -6  14   1    3.59    1.15
   5 -14  -1    8.61    1.58
  -5 -14   1   10.35    1.65
  -5  14   1    8.57    2.33
  -5  14   1    8.64    1.54
  -5  14   1    8.57    2.32
   5  14  -1   10.57    1.44
   5  14  -1    7.97    1.45
  -5  14   1   10.51    1.55
   4 -14  -1   10.13    1.69
  -4 -14   1   12.16    1.80
   4  14  -1   11.65    1.53
   4  14  -1    9.11    1.50
  -4  14   1   10.88    1.61
  -4  14   1   10.56    2.62
  -4  14   1   10.56    2.62
   4  14  -1    8.00    2.06
   4  14  -1    8.00    2.06
  -4  14   1    7.62    1.43
  -3 -14   1   -0.27    0.70
   3 -14  -1   -0.10    0.75
  -3  14   1    0.98    0.77
   3  14  -1    0.29    0.78
  -3  14   1    0.25    0.83
   3  14  -1    0.68    0.68
  -3  14   1    0.74    0.78
   3  14  -1    0.29    0.78
   3  14  -1   -0.28    0.64
  -3  14   1    0.25    0.83
   2 -14  -1    5.40    1.31
  -2 -14   1    4.70    1.21
   2  14  -1    4.57    1.59
  -2  14   1    5.79    1.23
   2  14  -1    4.57    1.58
  -2  14   1    4.89    1.18
   2  14  -1    7.02    1.27
  -2  14   1    2.44    1.30
  -2  14   1    2.44    1.30
   2  14  -1    6.19    1.22
  -1 -14   1    1.88    0.97
   1 -14  -1    1.04    0.88
   1  14  -1    0.91    0.75
   1  14  -1    1.25    0.73
  -1  14   1    2.73    1.39
   1  14  -1    1.97    1.18
  -1  14   1    1.36    0.83
   1  14  -1    1.97    1.18
  -1  14   1    2.73    1.39
  -1  14   1    0.52    0.68
   0 -14  -1    0.25    0.74
   0 -14   1   -0.34    0.68
   0  14  -1    0.73    0.99
   0  14   1    0.38    0.81
   0  14  -1    0.21    0.69
   0  14  -1    0.73    0.99
   0  14   1   -0.20    0.52
   0  14   1    0.38    0.81
   0  14   1    0.57    0.69
   0  14  -1    0.23    0.62
  -1 -14  -1    1.05    0.84
   1 -14   1    0.84    0.81
  -1  14  -1    1.09    0.97
   1  14   1    0.38    0.64
   1  14   1    0.73    0.90
   1  14   1   -0.10    0.64
   1  14   1    0.73    0.90
  -1  14  -1    1.09    0.97
  -1  14  -1    0.58    0.70
  -1  14  -1    0.53    0.77
  -2 -14  -1    5.19    1.24
  -2  14  -1    4.27    1.63
   2  14   1    4.53    0.99
   2  14   1    6.91    1.89
  -2  14  -1    4.27    1.63
  -2  14  -1    6.71    1.36
   2  14   1    5.65    1.23
   2  14   1    6.91    1.89
  -2  14  -1    3.45    1.05
  -3 -14  -1   -0.09    0.77
   3 -14   1    0.82    0.74
  -3  14  -1    1.12    0.87
   3  14   1    0.16    0.59
   3  14   1    2.41    1.21
   3  14   1    1.16    0.78
  -3  14  -1   -0.60    0.64
   3  14   1    2.41    1.21
  -3  14  -1   -0.60    0.64
  -3  14  -1    0.77    0.70
   4 -14   1    7.46    1.54
  -4 -14  -1    4.91    1.22
  -4  14  -1    8.05    2.12
   4  14   1    5.85    1.14
  -4  14  -1    4.11    1.17
  -4  14  -1    8.05    2.12
   4  14   1    5.53    1.19
  -4  14  -1    7.19    1.40
   5 -14   1   12.52    1.87
  -5  14  -1   12.22    1.72
   5  14   1   11.24    1.43
  -5  14  -1    8.26    2.15
  -5  14  -1    8.26    2.15
  -5  14  -1   13.37    1.93
   6  14   1    3.23    0.88
  -6  14  -1    3.47    1.19
   7  14   1    8.76    1.29
   8  14   1    0.75    0.65
  -5 -15   1    9.20    1.62
   5  15  -1   10.00    1.61
  -5  15   1    7.55    1.48
   5  15  -1    8.84    1.41
  -4 -15   1    0.19    0.77
   4  15  -1    0.66    0.69
  -4  15   1    0.01    0.85
   4  15  -1    0.93    0.79
  -3 -15   1    2.31    1.05
   3  15  -1    1.28    0.75
   3  15  -1    1.20    0.84
  -3  15   1   -0.07    0.80
   2 -15  -1    4.21    1.29
  -2 -15   1    4.42    1.22
  -2  15   1    5.54    1.27
   2  15  -1    4.60    1.14
   2  15  -1    4.29    1.13
  -2  15   1    3.52    1.10
  -1 -15   1    0.18    0.75
   1 -15  -1    1.29    0.91
  -1  15   1    1.38    0.79
  -1  15   1   -0.24    0.69
   1  15  -1    0.55    0.79
   1  15  -1    1.37    0.78
   0 -15   1   10.08    1.71
   0 -15  -1    8.64    1.60
   0  15   1   11.80    1.76
   0  15   1   16.25    1.88
   0  15  -1   12.23    1.71
   0  15  -1   12.29    1.76
  -1 -15  -1    0.98    0.82
   1 -15   1    0.62    0.87
   1  15   1    1.89    0.86
   1  15   1    0.02    0.71
  -1  15  -1    1.77    0.85
  -1  15  -1    0.49    0.80
  -2 -15  -1    1.09    0.87
   2  15   1    1.43    0.85
   2  15   1    0.97    0.79
  -2  15  -1    1.14    0.97
   3  15   1   -0.60    0.54
  -3  15  -1    1.19    0.95
   3  15   1    1.41    0.79
   4  15   1    6.26    1.22
  -4  15  -1    6.68    1.42
  -5  15  -1    0.33    0.97
   5  15   1    0.29    0.68
  20   0  -2   -0.39    0.63
  19   0  -2    7.89    1.49
 -19   0   2    5.48    1.26
  19   0  -2    5.93    1.13
  18   0  -2   15.12    1.84
 -18   0   2   14.33    1.68
  18   0  -2   18.45    1.73
 -17   0   2    5.22    1.07
  17   0  -2    3.36    0.97
  17   0  -2    7.35    1.10
  16   0  -2   20.77    2.04
 -16   0   2   18.13    1.83
  16   0  -2   20.62    1.50
  15   0  -2    3.06    0.70
  15   0  -2    1.87    0.71
  15   0  -2    3.37    1.23
 -15   0   2    1.38    0.67
  14   0  -2    4.31    1.26
  14   0  -2    4.37    1.27
 -14   0   2    3.56    0.79
  14   0  -2    4.66    0.94
  14   0  -2    4.09    0.73
  13   0  -2   30.63    2.63
  13   0  -2   37.61    2.12
 -13   0   2   35.98    1.96
  13   0  -2   36.12    1.76
  13   0  -2   30.55    2.63
  12   0  -2  102.14    3.80
  12   0  -2   94.42    4.79
 -12   0   2   95.47    4.77
 -12   0   2   95.46    4.77
  12   0  -2   94.50    4.79
  12   0  -2  102.93    4.92
  12   0  -2   97.88    3.34
 -12   0   2  102.73    3.63
  12   0  -2  102.94    4.93
  11   0  -2    1.34    0.50
  11   0  -2    0.62    0.51
 -11   0   2    1.11    0.39
  11   0  -2    0.75    0.40
  11   0  -2    0.62    0.51
 -11   0   2    0.58    0.42
  11   0  -2    0.75    0.40
  11   0  -2    1.39    0.41
 -11   0   2    1.02    0.50
 -11   0   2    1.02    0.50
 -10   0   2   85.00    4.05
  10   0  -2   80.72    4.02
  10   0  -2   84.63    4.09
  10   0  -2   84.63    4.09
 -10   0   2   85.01    4.05
  10   0  -2   80.72    4.02
  10   0  -2   82.39    2.78
 -10   0   2   84.71    2.99
  10   0  -2   81.14    3.11
 -10   0   2   81.00    2.71
   9   0  -2   43.45    1.72
   9   0  -2   45.85    2.02
   9   0  -2   44.22    2.65
  -9   0   2   45.55    2.68
  -9   0   2   45.55    2.69
  -9   0   2   45.27    1.70
   9   0  -2   40.27    2.56
  -9   0   2   43.24    1.87
   9   0  -2   44.22    2.65
   9   0  -2   40.27    2.56
  -8   0   2   25.12    1.27
   8   0  -2   21.49    1.07
   8   0  -2   25.93    1.38
   8   0  -2   24.64    1.81
  -8   0   2   23.84    1.79
   8   0  -2   23.45    1.77
   8   0  -2   23.45    1.77
   8   0  -2   24.64    1.81
  -8   0   2   23.84    1.79
  -8   0   2   22.84    1.09
   7   0  -2    2.40    0.50
  -7   0   2    3.78    0.84
  -7   0   2    3.51    0.52
  -7   0   2    2.73    0.68
   7   0  -2    2.67    0.40
  -7   0   2    3.78    0.84
   7   0  -2    3.26    0.75
   7   0  -2    3.26    0.75
  -7   0   2    3.50    0.45
   7   0  -2    3.38    0.77
  -7   0   2    2.73    0.68
   7   0  -2    3.38    0.77
   6   0  -2   94.59    3.65
   6   0  -2   90.05    2.64
  -6   0   2   95.95    3.60
  -6   0   2   92.48    3.64
  -6   0   2   87.43    2.77
  -6   0   2   81.56    2.59
   6   0  -2   88.86    2.87
   6   0  -2   84.48    3.49
   6   0  -2   84.48    3.49
   6   0  -2   90.78    2.78
  -6   0   2   87.55    2.83
  -6   0   2   95.95    3.60
   6   0  -2   94.59    3.65
  -6   0   2   92.48    3.64
   5   0  -2    7.03    0.94
  -5   0   2    7.33    0.95
  -5   0   2    7.33    0.95
   5   0  -2    8.33    0.66
   5   0  -2    4.79    0.76
   5   0  -2    6.96    0.51
  -5   0   2    6.96    0.50
   5   0  -2    7.03    0.94
  -5   0   2    7.41    0.98
  -5   0   2    7.40    0.66
  -5   0   2    5.65    0.60
   5   0  -2    4.79    0.76
   5   0  -2    6.60    0.60
  -5   0   2    7.41    0.98
   4   0  -2  163.42    4.46
   4   0  -2  164.01    5.12
  -4   0   2  169.27    5.15
  -4   0   2  163.60    5.17
   4   0  -2  165.48    4.32
  -4   0   2  163.59    5.17
  -4   0   2  163.32    4.39
   4   0  -2  164.01    5.13
   4   0  -2  166.10    5.16
   4   0  -2  171.76    4.41
   4   0  -2  166.10    5.16
  -4   0   2  169.27    5.15
  -4   0   2  159.65    4.30
  -4   0   2  173.42    4.47
  -3   0   2   16.87    0.75
  -3   0   2   15.06    0.97
  -3   0   2   15.05    0.98
  -3   0   2   17.09    0.72
   3   0  -2   16.64    0.75
   3   0  -2   15.74    0.98
   3   0  -2   16.63    0.65
   3   0  -2   17.58    1.03
   3   0  -2   17.58    1.03
  -3   0   2   15.17    0.63
   3   0  -2   16.37    0.71
   3   0  -2   15.74    0.98
  -3   0   2   15.06    0.97
  -3   0   2   15.05    0.98
  -2   0   2  172.06    4.31
   2   0  -2  165.25    4.82
   2   0  -2  172.45    4.35
   2   0  -2  170.29    4.83
  -2   0   2  172.81    4.84
  -2   0   2  176.74    4.30
   2   0  -2  169.72    4.31
  -2   0   2  172.82    4.84
   2   0  -2  165.26    4.82
   2   0  -2  168.60    4.28
   2   0  -2  170.27    4.84
  -2   0   2  173.40    4.34
   1   0  -2    1.69    0.20
   1   0  -2    1.60    0.27
  -1   0   2    2.08    0.20
   1   0  -2    1.60    0.27
   1   0  -2    1.54    0.15
  -1   0   2    2.02    0.17
   0   0   2  357.46   10.06
   0   0   2  423.61    9.68
   0   0  -2  431.39   10.10
   0   0  -2  423.92   10.09
   0   0   2  340.25    9.78
   0   0   2  357.44   10.07
   0   0   2  426.92    9.96
   0   0  -2  431.37   10.10
   0   0  -2  410.09    9.66
   1   0   2   11.12    0.54
  -1   0  -2   10.56    0.51
  -1   0  -2   11.06    0.40
   1   0   2   11.07    0.36
   1   0   2   10.55    0.39
   1   0   2   10.74    0.36
  -1   0  -2   11.09    0.41
   1   0   2   10.51    0.40
  -1   0  -2   10.55    0.51
   1   0   2   11.12    0.54
   2   0   2  426.89   10.28
   2   0   2  412.88   10.71
  -2   0  -2  433.85   10.96
   2   0   2  430.80   11.03
  -2   0  -2  430.39   10.99
  -2   0  -2  433.86   10.95
  -2   0  -2  428.38   10.28
  -2   0  -2  418.88   10.30
   2   0   2  430.80   11.03
   2   0   2  424.49   10.73
   2   0   2  434.83   10.32
  -2   0  -2  430.39   11.00
  -3   0  -2   65.65    2.20
  -3   0  -2   67.72    1.87
  -3   0  -2   65.65    2.20
   3   0   2   64.03    2.29
  -3   0  -2   66.34    2.27
   3   0   2   65.07    1.81
   3   0   2   64.03    2.29
   3   0   2   65.81    1.80
  -3   0  -2   66.02    1.90
   3   0   2   68.31    1.92
  -3   0  -2   66.34    2.27
   3   0   2   64.81    1.85
   4   0   2   13.14    0.95
   4   0   2   13.14    0.95
  -4   0  -2   14.16    0.95
  -4   0  -2   12.26    0.64
  -4   0  -2   14.91    0.72
  -4   0  -2   14.16    0.95
  -4   0  -2   14.79    0.93
   4   0   2   13.11    0.59
   4   0   2   13.61    0.66
   4   0   2   13.06    0.59
  -4   0  -2   14.79    0.93
   4   0   2   12.67    0.68
   5   0   2    0.72    0.21
   5   0   2    0.98    0.22
  -5   0  -2    1.00    0.31
   5   0   2    0.91    0.36
  -5   0  -2    0.95    0.29
  -5   0  -2    0.87    0.26
  -5   0  -2    1.37    0.41
   5   0   2    0.81    0.28
   5   0   2    0.68    0.23
  -5   0  -2    1.00    0.31
  -5   0  -2    1.37    0.41
   5   0   2    0.91    0.36
   6   0   2    1.74    0.52
  -6   0  -2    1.78    0.49
   6   0   2    1.74    0.52
   6   0   2    1.95    0.34
   6   0   2    1.93    0.40
   6   0   2    2.01    0.32
  -6   0  -2    1.48    0.34
  -6   0  -2    1.74    0.35
  -6   0  -2    1.78    0.49
   6   0   2    1.94    0.31
   7   0   2   76.30    2.42
   7   0   2   72.68    2.29
   7   0   2   73.68    2.29
  -7   0  -2   74.95    2.48
  -7   0  -2   71.16    3.09
   7   0   2   74.12    3.25
  -7   0  -2   71.16    3.09
   7   0   2   75.11    2.52
   7   0   2   74.12    3.25
  -7   0  -2   73.38    2.42
  -8   0  -2   19.32    1.47
  -8   0  -2   17.43    1.01
   8   0   2   15.51    0.87
   8   0   2   17.65    1.08
  -8   0  -2   19.32    1.47
   8   0   2   14.75    1.64
   8   0   2   14.75    1.64
   9   0   2   48.11    2.77
  -9   0  -2   52.93    2.73
   9   0   2   48.65    2.06
  -9   0  -2   49.08    1.97
  -9   0  -2   52.93    2.74
   9   0   2   48.11    2.78
   9   0   2   47.76    1.81
  10   0   2    2.48    0.58
 -10   0  -2    1.09    0.44
  10   0   2    2.74    0.80
  10   0   2    2.74    0.80
 -10   0  -2    2.18    0.53
  10   0   2    2.18    0.45
 -10   0  -2    1.09    0.44
 -11   0  -2  142.40    4.57
  11   0   2  148.63    4.78
  11   0   2  148.84    4.43
 -12   0  -2    0.92    0.50
  12   0   2    0.24    0.44
  12   0   2    0.95    0.40
  13   0   2   98.70    3.40
 -13   0  -2   99.84    3.64
  13   0   2   94.53    3.72
  14   0   2   18.70    1.51
 -14   0  -2   15.64    1.52
  14   0   2   19.74    1.35
  15   0   2    5.89    1.08
 -15   0  -2    5.03    0.97
  15   0   2    6.78    0.97
  16   0   2    0.40    0.52
  17   0   2    0.23    0.50
  18   0   2    0.13    0.57
  20  -1  -2   12.45    1.61
  20  -1  -2   11.91    1.75
  20   1  -2   14.44    1.62
  19  -1  -2   18.04    1.79
  19  -1  -2   21.52    2.30
 -19   1   2   21.50    2.17
  19   1  -2   17.84    1.74
  18  -1  -2   11.91    1.74
  18  -1  -2    8.44    1.23
 -18  -1   2   10.98    1.51
 -18   1   2   10.30    1.54
  18   1  -2    8.03    1.45
  18   1  -2   10.60    1.32
 -17  -1   2   15.84    1.68
  17  -1  -2   12.80    1.74
  17  -1  -2   13.57    1.46
  17   1  -2   14.38    1.71
  17   1  -2   17.19    2.64
 -17   1   2   13.87    1.67
  17   1  -2   15.02    1.48
  16  -1  -2    0.32    0.60
 -16  -1   2    0.90    0.64
  16  -1  -2    1.37    0.61
  16   1  -2    0.67    0.61
  16   1  -2    0.41    0.64
 -16   1   2    2.39    0.79
  16   1  -2    0.41    0.63
  16   1  -2    1.35    0.62
  15  -1  -2    4.12    0.94
 -15  -1   2    3.04    0.79
  15  -1  -2    5.03    0.86
  15   1  -2    3.98    1.23
  15   1  -2    5.02    0.83
  15   1  -2    4.82    1.01
  15   1  -2    3.92    1.23
 -15   1   2    3.82    0.87
  14  -1  -2    0.31    0.42
 -14  -1   2    1.14    0.53
  14  -1  -2    0.09    0.42
  14   1  -2    0.52    0.44
  14   1  -2    1.55    0.71
  14   1  -2    1.55    0.71
 -14   1   2    0.01    0.44
  14   1  -2    0.62    0.49
 -13  -1   2    4.29    0.79
  13  -1  -2    2.72    0.73
  13  -1  -2    3.32    0.65
  13   1  -2    3.22    1.04
  13   1  -2    3.75    0.67
  13   1  -2    3.30    0.75
  13   1  -2    3.22    1.04
 -13   1   2    8.19    1.57
 -13   1   2    2.96    0.72
 -13   1   2    8.19    1.57
 -12  -1   2    1.96    0.57
 -12  -1   2    0.74    0.58
  12  -1  -2    1.68    0.50
  12  -1  -2    1.37    0.57
  12  -1  -2    1.37    0.57
  12  -1  -2    1.31    0.72
 -12  -1   2    0.74    0.58
  12  -1  -2    2.33    0.66
  12   1  -2    2.09    0.82
  12   1  -2    1.76    0.67
 -12   1   2    2.60    0.86
 -12   1   2    1.86    0.58
 -12   1   2    2.60    0.86
  12   1  -2    2.09    0.82
  12   1  -2    1.60    0.55
  12   1  -2    1.76    0.67
  12   1  -2    2.64    0.54
  11  -1  -2  128.49    4.00
 -11  -1   2  123.60    5.38
 -11  -1   2  123.59    5.38
  11  -1  -2  134.71    5.75
  11  -1  -2  128.57    5.66
 -11  -1   2  127.36    4.18
 -11  -1   2  128.04    3.86
  11  -1  -2  132.77    4.49
  11  -1  -2  127.76    5.63
  11  -1  -2  134.72    5.75
  11   1  -2  129.18    3.96
 -11   1   2  127.43    4.26
 -11   1   2  123.08    5.54
  11   1  -2  131.09    5.55
 -11   1   2  123.07    5.54
  11   1  -2  123.98    5.47
 -11   1   2  127.63    3.95
  11   1  -2  122.22    4.30
  11   1  -2  131.09    5.54
  11   1  -2  123.98    5.48
 -10  -1   2   58.88    2.10
  10  -1  -2   57.42    2.51
 -10  -1   2   53.16    2.26
  10  -1  -2   58.88    3.33
 -10  -1   2   55.60    3.14
  10  -1  -2   57.13    2.17
  10  -1  -2   58.97    3.33
 -10  -1   2   55.60    3.14
  10  -1  -2   53.20    3.24
  10  -1  -2   53.21    3.24
  10   1  -2   65.12    3.41
  10   1  -2   57.22    2.43
 -10   1   2   57.04    3.32
  10   1  -2   60.15    3.27
  10   1  -2   60.16    3.27
  10   1  -2   65.12    3.41
 -10   1   2   60.01    2.17
 -10   1   2   60.75    2.42
 -10   1   2   57.05    3.31
  10   1  -2   58.33    2.15
  -9  -1   2   14.76    1.77
  -9  -1   2   16.36    0.93
   9  -1  -2   13.72    1.67
  -9  -1   2   15.45    1.03
   9  -1  -2   13.51    1.70
   9  -1  -2   15.87    1.15
  -9  -1   2   14.76    1.77
   9  -1  -2   13.51    1.70
   9  -1  -2   13.72    1.67
   9  -1  -2   15.49    0.95
   9   1  -2   18.00    1.97
  -9   1   2   11.23    1.59
   9   1  -2   17.39    1.89
   9   1  -2   18.00    1.97
   9   1  -2   16.72    1.13
   9   1  -2   17.39    1.90
   9   1  -2   18.73    0.99
  -9   1   2   11.23    1.59
  -9   1   2   16.49    1.09
  -9   1   2   15.83    0.94
  -8  -1   2   95.61    3.89
   8  -1  -2   81.73    3.77
   8  -1  -2   86.56    3.91
  -8  -1   2   82.94    2.61
  -8  -1   2   95.62    3.89
   8  -1  -2   84.93    3.01
   8  -1  -2   86.56    3.92
   8  -1  -2   84.93    2.69
  -8  -1   2   86.79    2.84
   8  -1  -2   81.64    3.77
  -8   1   2   77.56    3.74
  -8   1   2   78.72    2.65
   8   1  -2   80.96    3.68
   8   1  -2   80.96    3.69
  -8   1   2   77.56    3.75
  -8   1   2   86.43    2.90
   8   1  -2   91.56    3.88
   8   1  -2   91.56    3.87
   8   1  -2   84.85    2.94
   8   1  -2   82.10    2.64
   7  -1  -2   18.54    1.86
   7  -1  -2   15.70    1.02
   7  -1  -2   13.58    0.80
   7  -1  -2   15.79    1.65
  -7  -1   2   13.99    1.53
  -7  -1   2   13.31    0.75
   7  -1  -2   18.54    1.87
   7  -1  -2   15.78    1.65
  -7  -1   2   13.22    0.86
  -7  -1   2   13.98    1.53
  -7   1   2   15.47    1.69
  -7   1   2   15.47    1.68
   7   1  -2   15.89    1.63
  -7   1   2   13.09    0.80
   7   1  -2   11.91    1.39
  -7   1   2   14.28    0.92
   7   1  -2   15.53    0.82
   7   1  -2   15.89    1.63
   7   1  -2   14.58    0.95
   7   1  -2   11.91    1.39
  -6  -1   2    0.02    0.28
   6  -1  -2    0.09    0.21
   6  -1  -2    0.06    0.23
  -6  -1   2    0.11    0.24
  -6  -1   2   -0.03    0.21
   6  -1  -2   -0.51    0.17
   6  -1  -2    0.06    0.19
  -6  -1   2    0.04    0.20
   6  -1  -2    0.37    0.35
   6  -1  -2   -0.51    0.17
  -6  -1   2    0.19    0.22
  -6  -1   2    0.02    0.28
   6  -1  -2    0.37    0.35
  -6  -1   2    0.11    0.24
  -6   1   2   -0.28    0.16
  -6   1   2    0.37    0.35
   6   1  -2   -0.22    0.17
   6   1  -2   -0.09    0.22
   6   1  -2    0.13    0.19
  -6   1   2    0.37    0.35
   6   1  -2   -0.09    0.22
  -6   1   2   -0.04    0.22
   6   1  -2    0.33    0.37
   6   1  -2    0.33    0.37
  -6   1   2   -0.41    0.19
   6   1  -2   -0.29    0.20
  -6   1   2    0.34    0.25
  -6   1   2   -0.41    0.19
  -5  -1   2    3.19    0.66
  -5  -1   2    4.75    0.75
   5  -1  -2    4.53    0.45
  -5  -1   2    3.19    0.66
   5  -1  -2    3.84    0.52
   5  -1  -2    3.66    0.73
  -5  -1   2    4.75    0.75
  -5  -1   2    5.79    0.56
  -5  -1   2    3.52    0.46
   5  -1  -2    4.62    0.78
   5  -1  -2    4.62    0.78
  -5  -1   2    4.13    0.41
   5  -1  -2    3.66    0.73
   5  -1  -2    3.99    0.48
  -5   1   2    4.06    0.74
   5   1  -2    4.11    0.74
  -5   1   2    3.98    0.52
   5   1  -2    4.13    0.72
   5   1  -2    4.09    0.46
   5   1  -2    4.86    0.55
  -5   1   2    3.39    0.40
  -5   1   2    4.43    0.71
  -5   1   2    4.06    0.74
  -5   1   2    3.56    0.46
  -5   1   2    4.43    0.71
   5   1  -2    4.13    0.72
   5   1  -2    4.11    0.74
   5   1  -2    5.59    0.44
   4  -1  -2   26.18    1.45
   4  -1  -2   21.84    1.40
   4  -1  -2   21.84    1.40
  -4  -1   2   24.81    1.38
  -4  -1   2   22.65    0.97
  -4  -1   2   23.81    0.90
   4  -1  -2   24.02    1.01
   4  -1  -2   26.18    1.45
  -4  -1   2   23.40    1.37
   4  -1  -2   24.87    0.92
   4  -1  -2   25.54    1.09
  -4  -1   2   23.40    1.37
  -4  -1   2   24.81    1.38
  -4  -1   2   24.26    1.02
  -4   1   2   22.28    1.41
  -4   1   2   24.17    1.01
   4   1  -2   24.09    1.03
  -4   1   2   22.28    1.41
   4   1  -2   23.14    1.36
  -4   1   2   23.32    1.05
   4   1  -2   23.14    1.36
   4   1  -2   22.23    0.97
  -4   1   2   23.62    0.93
   4   1  -2   22.18    0.88
  -3  -1   2  141.15    3.74
  -3  -1   2  136.79    4.29
   3  -1  -2  131.64    4.28
   3  -1  -2  142.86    4.40
  -3  -1   2  142.12    3.63
  -3  -1   2  136.79    4.29
   3  -1  -2  142.86    4.40
  -3  -1   2  137.74    3.70
   3  -1  -2  131.67    4.28
   3  -1  -2  139.73    3.71
   3  -1  -2  144.45    3.79
   3  -1  -2  137.52    3.63
  -3   1   2  143.33    4.41
   3   1  -2  139.53    4.33
  -3   1   2  138.13    4.30
  -3   1   2  140.06    3.71
  -3   1   2  143.34    4.42
   3   1  -2  141.12    3.75
  -3   1   2  138.12    4.31
   3   1  -2  139.40    3.63
  -3   1   2  142.01    3.77
   3   1  -2  143.31    3.71
  -3   1   2  136.37    3.64
   3   1  -2  139.53    4.33
   2  -1  -2   53.32    1.48
  -2  -1   2   56.34    2.00
  -2  -1   2   56.34    2.00
  -2  -1   2   50.80    1.58
  -2  -1   2   55.39    1.59
   2  -1  -2   51.39    1.94
   2  -1  -2   53.68    1.56
   2  -1  -2   51.39    1.94
   2  -1  -2   54.53    1.93
   2  -1  -2   52.60    1.60
   2  -1  -2   54.56    1.93
   2   1  -2   53.89    1.58
  -2   1   2   54.17    1.56
   2   1  -2   54.30    1.99
   2   1  -2   52.18    1.49
  -2   1   2   49.09    1.57
  -2   1   2   49.07    1.93
  -2   1   2   53.40    1.50
   2   1  -2   54.29    1.99
  -2   1   2   49.07    1.93
   1  -1  -2  486.80   12.39
  -1  -1   2  495.03   11.70
   1  -1  -2  481.72   11.63
   1  -1  -2  489.99   11.91
   1  -1  -2  451.73   11.94
  -1  -1   2  471.20   12.03
  -1  -1   2  491.49   12.23
   1  -1  -2  486.79   12.38
  -1   1   2  489.42   12.41
  -1   1   2  466.64   12.10
   1   1  -2  475.90   12.06
  -1   1   2  489.41   12.40
   1   1  -2  490.55   11.71
   1   1  -2  497.41   12.58
   1   1  -2  497.42   12.58
   1   1  -2  494.29   11.70
  -1   1   2  483.08   11.88
   0  -1  -2   60.00    1.51
   0  -1  -2   61.27    1.66
   0  -1   2   56.76    1.65
   0  -1   2   57.57    1.59
   0  -1  -2   61.27    1.66
   0  -1   2   58.57    1.67
   0  -1  -2   58.87    1.49
   0   1   2   60.11    1.49
   0   1   2   58.79    1.68
   0   1   2   57.58    1.48
   0   1   2   59.64    1.48
   0   1  -2   57.41    1.60
   0   1  -2   57.95    1.67
   0   1   2   58.80    1.69
   0   1  -2   60.47    2.04
   0   1  -2   60.47    2.04
   0   1  -2   57.59    1.66
   1  -1   2    4.72    0.37
   1  -1   2    4.82    0.32
   1  -1   2    4.38    0.35
  -1   1  -2    4.25    0.56
  -1   1  -2    4.25    0.56
  -1   1  -2    4.15    0.33
  -1   1  -2    4.63    0.36
  -1   1  -2    4.50    0.39
   2  -1   2   48.20    1.45
   2  -1   2   42.36    1.34
  -2  -1  -2   46.36    1.37
  -2  -1  -2   45.90    1.36
  -2  -1  -2   45.90    1.36
  -2  -1  -2   44.85    1.22
  -2  -1  -2   46.36    1.37
   2  -1   2   45.93    1.48
  -2  -1  -2   46.12    1.23
  -2   1  -2   45.68    1.36
   2   1   2   43.38    1.22
   2   1   2   47.89    1.46
  -2   1  -2   43.42    1.82
   2   1   2   44.94    1.45
  -2   1  -2   46.42    1.48
   2   1   2   46.17    1.20
   2   1   2   46.04    1.24
   2   1   2   45.62    1.20
   2   1   2   44.94    1.45
   2   1   2   47.89    1.45
  -2   1  -2   48.68    1.46
  -2   1  -2   43.42    1.82
  -3  -1  -2    7.20    0.40
   3  -1   2    6.95    0.47
   3  -1   2    7.36    0.54
   3  -1   2    7.14    0.44
  -3  -1  -2    7.57    0.39
  -3  -1  -2    6.25    0.47
  -3  -1  -2    6.48    0.50
  -3  -1  -2    6.25    0.47
  -3  -1  -2    6.48    0.50
   3   1   2    7.37    0.37
  -3   1  -2    7.60    0.84
  -3   1  -2    7.60    0.84
   3   1   2    7.17    0.34
   3   1   2    6.90    0.40
  -3   1  -2    6.78    0.44
  -3   1  -2    6.95    0.51
   3   1   2    6.35    0.55
   3   1   2    7.63    0.55
   3   1   2    6.34    0.55
   3   1   2    7.63    0.55
  -3   1  -2    7.79    0.52
   3   1   2    6.54    0.34
  -4  -1  -2   14.63    0.86
  -4  -1  -2   16.22    0.70
   4  -1   2   14.92    0.71
   4  -1   2   15.89    0.82
  -4  -1  -2   15.45    0.90
  -4  -1  -2   15.45    0.90
  -4  -1  -2   14.63    0.86
   4  -1   2   15.67    0.77
  -4  -1  -2   15.74    0.67
   4   1   2   16.69    0.68
   4   1   2   15.22    0.95
  -4   1  -2   17.81    1.19
   4   1   2   14.88    0.70
  -4   1  -2   14.42    1.03
   4   1   2   15.11    0.61
  -4   1  -2   15.17    0.77
   4   1   2   16.16    0.94
  -4   1  -2   14.51    0.68
   4   1   2   16.16    0.94
  -4   1  -2   17.81    1.19
  -4   1  -2   15.87    0.82
  -4   1  -2   14.33    1.03
   4   1   2   15.44    0.61
   4   1   2   15.22    0.95
  -5  -1  -2    9.01    0.75
  -5  -1  -2    7.47    0.51
   5  -1   2    7.45    0.52
  -5  -1  -2    8.00    0.82
  -5  -1  -2    7.14    0.53
  -5  -1  -2    8.00    0.82
  -5  -1  -2    9.01    0.75
   5  -1   2    8.34    0.66
   5  -1   2    8.76    0.60
   5   1   2    8.45    0.94
   5   1   2    8.03    0.56
  -5   1  -2    8.94    1.05
  -5   1  -2    9.57    1.10
   5   1   2    8.26    0.47
  -5   1  -2    8.26    0.63
   5   1   2    8.57    0.52
   5   1   2    8.88    0.92
   5   1   2    8.45    0.94
   5   1   2    8.88    0.92
  -5   1  -2    6.91    0.65
  -5   1  -2    8.94    1.05
  -5   1  -2    9.57    1.10
   5   1   2    8.12    0.48
   6  -1   2   53.55    1.89
  -6  -1  -2   56.68    2.34
  -6  -1  -2   55.62    1.79
  -6  -1  -2   55.25    1.84
   6  -1   2   53.43    1.99
   6  -1   2   52.35    1.77
  -6  -1  -2   56.69    2.34
   6   1   2   55.08    2.42
   6   1   2   55.08    2.42
  -6   1  -2   53.24    2.56
  -6   1  -2   53.50    1.97
   6   1   2   51.30    1.67
   6   1   2   52.51    1.84
   6   1   2   53.87    1.78
  -6   1  -2   51.45    1.90
   6   1   2   52.47    1.68
   6   1   2   53.02    2.36
   6   1   2   53.02    2.36
  -6   1  -2   53.24    2.56
   7  -1   2    4.70    0.54
  -7  -1  -2    4.73    0.79
  -7  -1  -2    4.73    0.79
  -7  -1  -2    4.99    0.57
  -7  -1  -2    5.58    0.58
   7  -1   2    4.19    0.62
  -7   1  -2    5.75    0.95
   7   1   2    5.84    0.64
  -7   1  -2    5.00    0.62
  -7   1  -2    5.75    0.95
   7   1   2    4.73    0.53
   7   1   2    4.62    0.81
   7   1   2    4.48    0.47
   7   1   2    4.62    0.81
   7   1   2    5.52    0.88
   7   1   2    4.82    0.47
   7   1   2    5.52    0.88
  -8  -1  -2   16.88    1.32
   8  -1   2   15.83    1.09
  -8  -1  -2   16.88    1.32
   8  -1   2   16.03    0.93
  -8  -1  -2   16.27    0.95
  -8   1  -2   17.90    1.83
   8   1   2   16.56    1.39
   8   1   2   15.79    0.99
   8   1   2   17.29    1.40
   8   1   2   16.55    1.39
  -8   1  -2   17.90    1.83
   8   1   2   17.29    1.40
   8   1   2   16.40    0.86
   8   1   2   16.94    0.87
  -8   1  -2   16.38    1.03
  -9  -1  -2    3.84    0.79
   9  -1   2    2.92    0.48
  -9  -1  -2    3.84    0.79
  -9  -1  -2    2.95    0.51
   9  -1   2    2.93    0.59
   9   1   2    3.02    0.44
   9   1   2    3.08    0.75
   9   1   2    2.80    0.44
  -9   1  -2    2.96    0.56
   9   1   2    2.53    0.68
  -9   1  -2    1.55    0.57
  -9   1  -2    1.55    0.57
   9   1   2    3.71    0.61
   9   1   2    2.53    0.68
   9   1   2    3.08    0.75
  10  -1   2   19.38    1.31
 -10  -1  -2   17.54    1.13
  10  -1   2   20.04    1.15
 -10  -1  -2   17.66    1.84
 -10  -1  -2   17.66    1.84
 -10   1  -2   19.55    1.27
  10   1   2   18.41    1.95
  10   1   2   18.41    1.95
  10   1   2   19.93    2.03
  10   1   2   19.95    1.07
  10   1   2   19.51    1.22
 -10   1  -2   19.52    2.12
  10   1   2   19.88    2.02
 -10   1  -2   19.52    2.12
  11  -1   2    3.61    0.73
 -11  -1  -2    3.72    0.63
  11  -1   2    2.88    0.58
  11   1   2    2.72    0.82
  11   1   2    3.10    0.64
  11   1   2    1.48    0.67
  11   1   2    2.72    0.82
  11   1   2    2.98    0.53
 -11   1  -2    4.17    0.75
  12  -1   2   45.67    2.31
 -12  -1  -2   47.99    2.12
  12  -1   2   43.58    1.99
  12   1   2   44.87    2.18
 -12   1  -2   45.47    2.19
  12   1   2   49.50    1.99
 -13  -1  -2   29.19    1.68
  13  -1   2   27.53    1.83
  13  -1   2   26.57    1.58
  13   1   2   31.73    1.58
 -13   1  -2   29.14    1.79
  13   1   2   30.39    1.80
  14  -1   2   11.01    1.36
  14  -1   2    9.48    1.09
 -14  -1  -2    9.74    1.18
  14   1   2    8.83    0.99
  14   1   2    9.52    1.22
 -14   1  -2   11.09    1.31
  15  -1   2   35.35    1.92
  15  -1   2   30.36    2.10
 -15   1  -2   34.40    2.10
  15   1   2   30.85    1.99
  15   1   2   31.69    1.76
  16  -1   2   -0.11    0.46
  16  -1   2   -0.13    0.59
 -16   1  -2   -0.35    0.62
  16   1   2   -0.19    0.39
  17  -1   2   -0.13    0.50
  17   1   2   -0.18    0.45
  18  -1   2    2.96    0.85
  18   1   2    3.12    0.83
  20  -2  -2    1.25    0.85
  20  -2  -2    0.90    0.88
  20   2  -2   -0.62    0.54
 -20   2   2    0.91    0.87
  19  -2  -2    7.02    1.24
  19  -2  -2    4.55    1.22
  19   2  -2    6.09    1.10
 -19   2   2    5.67    1.28
  18  -2  -2   17.24    1.77
  18  -2  -2   19.20    2.17
 -18  -2   2   18.30    1.88
  18   2  -2   22.20    2.16
  18   2  -2   17.09    2.68
  18   2  -2   20.22    1.56
 -18   2   2   18.16    2.01
 -17  -2   2    3.19    0.91
  17  -2  -2    3.45    1.02
  17  -2  -2    2.90    0.85
  17   2  -2    4.91    1.38
  17   2  -2    4.94    1.38
  17   2  -2    4.02    1.00
  17   2  -2    3.32    0.81
 -17   2   2    3.22    0.97
  16  -2  -2   12.12    1.35
 -16  -2   2   13.87    1.51
  16  -2  -2   13.98    1.70
  16   2  -2   13.15    1.33
  16   2  -2   12.73    2.21
  16   2  -2   12.72    2.21
 -16   2   2   10.51    1.46
  16   2  -2   10.87    1.42
  15  -2  -2   -0.44    0.41
 -15  -2   2    0.27    0.48
  15  -2  -2   -0.03    0.47
  15   2  -2   -0.03    0.45
 -15   2   2    0.52    0.56
  15   2  -2    0.02    0.41
  15   2  -2   -0.03    0.45
  15   2  -2    0.04    0.42
  14  -2  -2   -0.33    0.38
  14  -2  -2   -0.32    0.42
 -14  -2   2   -0.23    0.36
  14   2  -2   -0.18    0.34
  14   2  -2   -0.22    0.38
  14   2  -2   -0.22    0.38
 -14   2   2    0.57    0.50
  14   2  -2   -0.25    0.36
  13  -2  -2   11.82    1.19
  13  -2  -2    9.31    1.26
 -13  -2   2    8.84    1.09
 -13   2   2    6.89    1.57
  13   2  -2   10.47    1.74
  13   2  -2    8.90    0.98
 -13   2   2    9.81    1.23
 -13   2   2    6.89    1.57
  13   2  -2    8.41    1.12
  13   2  -2   10.47    1.74
 -12  -2   2   16.22    1.24
  12  -2  -2   17.34    1.43
  12  -2  -2   18.44    2.44
  12  -2  -2   19.82    1.28
 -12  -2   2   21.38    2.31
 -12  -2   2   21.38    2.31
  12  -2  -2   18.44    2.43
 -12   2   2   19.54    1.24
  12   2  -2   15.59    2.02
  12   2  -2   15.59    2.02
 -12   2   2   17.42    2.34
 -12   2   2   17.45    1.34
  12   2  -2   17.25    1.13
 -12   2   2   17.42    2.34
  12   2  -2   17.86    1.36
 -11  -2   2   10.56    1.60
  11  -2  -2    9.67    1.18
 -11  -2   2   12.17    1.15
  11  -2  -2    8.14    1.56
 -11  -2   2   10.57    1.60
  11  -2  -2    8.14    1.56
  11  -2  -2    8.89    0.94
  11   2  -2   10.19    1.56
  11   2  -2   10.14    0.84
  11   2  -2   11.11    1.17
 -11   2   2    9.30    1.66
 -11   2   2   10.06    1.14
 -11   2   2   10.03    0.97
 -11   2   2    9.30    1.66
  11   2  -2   10.19    1.56
  10  -2  -2   28.42    2.28
 -10  -2   2   27.37    1.44
  10  -2  -2   28.67    1.67
  10  -2  -2   28.43    2.28
 -10  -2   2   29.21    2.12
 -10  -2   2   25.15    1.21
  10  -2  -2   24.09    1.31
 -10  -2   2   29.21    2.12
  10   2  -2   27.80    1.55
 -10   2   2   27.06    1.39
  10   2  -2   23.69    1.98
 -10   2   2   26.72    2.21
  10   2  -2   23.69    1.98
 -10   2   2   26.72    2.22
 -10   2   2   24.15    1.48
  10   2  -2   25.48    1.28
  -9  -2   2  113.21    4.74
   9  -2  -2  115.84    5.07
   9  -2  -2  121.45    3.63
  -9  -2   2  113.21    4.73
  -9  -2   2  115.86    3.44
  -9  -2   2  115.48    3.69
   9  -2  -2  122.07    4.04
   9  -2  -2  115.84    5.06
  -9   2   2  105.95    4.93
   9   2  -2  121.15    3.55
   9   2  -2  118.14    3.84
  -9   2   2  105.96    4.92
   9   2  -2  120.49    4.88
   9   2  -2  120.49    4.88
  -9   2   2  121.68    3.89
  -9   2   2  112.59    3.58
  -8  -2   2   11.53    0.84
   8  -2  -2   11.44    1.61
   8  -2  -2   14.20    1.06
   8  -2  -2   11.44    1.61
  -8  -2   2   10.10    1.34
   8  -2  -2   12.73    0.83
  -8  -2   2   12.22    0.74
  -8  -2   2   10.10    1.34
  -8   2   2   13.36    0.97
  -8   2   2    9.63    1.44
   8   2  -2   13.31    0.94
   8   2  -2   12.98    1.54
   8   2  -2   11.97    0.78
  -8   2   2   12.52    0.84
   8   2  -2   12.98    1.54
  -8   2   2    9.63    1.45
  -7  -2   2  120.03    4.49
  -7  -2   2  120.03    4.49
   7  -2  -2  117.28    4.74
   7  -2  -2  117.28    4.74
  -7  -2   2  120.97    3.56
  -7  -2   2  115.02    3.33
   7  -2  -2  113.37    3.76
   7  -2  -2  112.49    3.42
   7   2  -2  119.69    4.56
  -7   2   2  114.25    4.70
   7   2  -2  119.68    4.56
   7   2  -2  114.66    3.38
  -7   2   2  114.25    4.70
  -7   2   2  118.53    3.67
  -7   2   2  120.09    4.60
   7   2  -2  119.48    3.65
  -7   2   2  115.06    3.46
  -7   2   2  120.10    4.60
   6  -2  -2    3.95    0.60
  -6  -2   2    3.10    0.69
  -6  -2   2    4.40    0.78
   6  -2  -2    5.08    0.93
  -6  -2   2    4.40    0.78
  -6  -2   2    3.26    0.49
  -6  -2   2    4.66    0.47
  -6  -2   2    5.13    0.61
   6  -2  -2    4.43    0.50
   6  -2  -2    5.08    0.93
  -6  -2   2    3.10    0.69
  -6   2   2    3.90    0.78
   6   2  -2    3.94    0.45
   6   2  -2    3.56    0.72
  -6   2   2    4.72    0.91
  -6   2   2    4.72    0.91
  -6   2   2    3.90    0.78
   6   2  -2    4.73    0.59
  -6   2   2    4.52    0.59
   6   2  -2    4.43    0.55
  -6   2   2    4.73    0.53
   6   2  -2    3.56    0.72
  -5  -2   2  127.85    4.29
   5  -2  -2  120.08    3.38
   5  -2  -2  127.67    3.69
  -5  -2   2  121.50    3.51
   5  -2  -2  119.28    3.52
  -5  -2   2  127.84    4.29
   5  -2  -2  120.60    4.46
  -5  -2   2  117.96    4.23
  -5  -2   2  117.95    4.23
  -5  -2   2  117.31    3.31
  -5  -2   2  116.66    3.45
   5  -2  -2  120.61    4.46
  -5   2   2  115.68    4.31
   5   2  -2  119.09    3.53
  -5   2   2  115.67    4.31
  -5   2   2  119.55    4.47
  -5   2   2  120.30    3.41
   5   2  -2  129.94    3.52
  -5   2   2  119.47    3.62
  -5   2   2  119.54    4.47
   5   2  -2  120.28    4.29
   5   2  -2  116.84    3.33
   5   2  -2  120.28    4.29
  -5   2   2  127.16    3.58
   4  -2  -2    3.69    0.45
  -4  -2   2    3.70    0.37
   4  -2  -2    4.00    0.41
   4  -2  -2    3.40    0.71
   4  -2  -2    3.40    0.71
  -4  -2   2    4.32    0.49
  -4  -2   2    3.56    0.62
  -4  -2   2    3.56    0.62
   4  -2  -2    3.15    0.47
  -4   2   2    5.33    0.88
  -4   2   2    3.58    0.65
   4   2  -2    4.25    0.71
  -4   2   2    3.28    0.38
  -4   2   2    3.81    0.49
   4   2  -2    4.00    0.48
   4   2  -2    3.99    0.48
   4   2  -2    4.25    0.71
   4   2  -2    3.44    0.37
  -4   2   2    5.33    0.88
  -4   2   2    3.56    0.65
  -4   2   2    2.62    0.41
  -3  -2   2   13.72    0.74
  -3  -2   2   13.07    1.00
  -3  -2   2   13.07    1.00
  -3  -2   2   14.05    0.73
   3  -2  -2   14.57    1.09
   3  -2  -2   14.44    0.80
   3  -2  -2   15.35    0.68
   3  -2  -2   13.33    0.73
   3  -2  -2   14.57    1.09
  -3  -2   2   15.49    0.65
  -3   2   2   15.42    1.08
   3   2  -2   13.63    1.03
  -3   2   2   16.34    1.15
   3   2  -2   15.14    0.75
  -3   2   2   14.00    0.74
  -3   2   2   13.44    0.78
  -3   2   2   16.34    1.16
   3   2  -2   13.94    0.65
   3   2  -2   13.63    1.03
   3   2  -2   15.38    0.77
  -3   2   2   13.42    0.67
  -2  -2   2   80.80    2.94
  -2  -2   2   85.83    2.42
   2  -2  -2   81.34    2.90
   2  -2  -2   83.43    2.35
   2  -2  -2   81.81    2.41
  -2  -2   2   80.81    2.94
   2  -2  -2   83.20    2.26
  -2  -2   2   81.49    2.39
   2  -2  -2   81.33    2.90
  -2  -2   2   83.23    2.28
   2   2  -2   79.96    2.94
  -2   2   2   84.21    2.37
   2   2  -2   82.18    2.30
  -2   2   2   84.36    2.94
  -2   2   2   84.93    2.29
  -2   2   2   84.03    2.41
  -2   2   2   84.36    2.94
   2   2  -2   79.76    2.40
   2   2  -2   82.17    2.40
   2   2  -2   79.97    2.94
   1  -2  -2  232.81    5.72
  -1  -2   2  232.48    5.84
  -1  -2   2  231.52    5.77
   1  -2  -2  228.92    6.38
   1  -2  -2  232.72    5.77
  -1  -2   2  230.67    6.60
   1  -2  -2  229.94    5.69
  -1  -2   2  230.68    6.60
  -1  -2   2  214.44    5.82
   1  -2  -2  228.94    6.37
  -1   2   2  224.03    6.38
  -1   2   2  225.32    5.72
   1   2  -2  230.29    5.79
   1   2  -2  232.65    6.63
   1   2  -2  232.65    6.63
   1   2  -2  220.48    5.83
  -1   2   2  230.38    5.72
  -1   2   2  224.03    6.37
  -1   2   2  241.20    5.78
   1   2  -2  227.80    5.85
   0  -2  -2   81.15    2.15
   0  -2   2   78.91    2.34
   0  -2   2   80.67    2.89
   0  -2   2   79.46    2.23
   0  -2  -2   80.36    2.51
   0  -2  -2   80.36    2.51
   0  -2  -2   81.10    2.18
   0  -2   2   80.81    2.33
   0  -2   2   80.67    2.89
   0   2   2   81.10    2.12
   0   2   2   82.35    2.15
   0   2  -2   80.05    2.36
   0   2   2   80.06    2.54
   0   2  -2   81.82    2.25
   0   2  -2   80.06    2.34
   0   2  -2   79.77    2.88
   0   2   2   82.97    2.19
   0   2   2   83.39    2.11
   0   2  -2   79.77    2.88
   0   2   2   80.06    2.54
  -1  -2  -2  251.09    6.02
  -1  -2  -2  246.37    6.48
   1  -2   2  248.27    6.28
   1  -2   2  253.53    7.17
   1  -2   2  238.79    6.22
  -1  -2  -2  245.64    6.01
   1  -2   2  241.10    6.32
  -1  -2  -2  246.38    6.48
   1  -2   2  253.52    7.18
   1   2   2  249.04    6.55
   1   2   2  245.68    6.03
  -1   2  -2  244.52    6.29
  -1   2  -2  246.40    7.14
   1   2   2  246.55    6.03
   1   2   2  243.14    6.04
  -1   2  -2  248.42    6.32
  -1   2  -2  236.97    6.23
   1   2   2  254.16    6.02
   1   2   2  249.03    6.55
  -1   2  -2  246.40    7.13
  -2  -2  -2  291.00    7.61
   2  -2   2  276.65    7.35
   2  -2   2  300.44    8.43
  -2  -2  -2  302.61    7.11
   2  -2   2  300.45    8.43
  -2  -2  -2  291.00    7.60
   2  -2   2  295.66    7.48
  -2  -2  -2  296.82    7.10
   2  -2   2  288.11    7.40
   2   2   2  290.12    7.15
  -2   2  -2  295.28    7.43
   2   2   2  297.93    7.12
  -2   2  -2  284.17    7.46
  -2   2  -2  289.04    8.40
  -2   2  -2  286.14    7.37
   2   2   2  298.32    7.71
   2   2   2  298.33    7.71
   2   2   2  288.59    7.16
  -2   2  -2  289.08    8.39
   2   2   2  293.89    7.11
  -3  -2  -2    7.11    0.41
  -3  -2  -2    7.86    0.40
   3  -2   2    7.87    0.57
  -3  -2  -2    7.11    0.52
   3  -2   2    7.77    0.53
   3  -2   2    7.31    0.96
  -3  -2  -2    6.73    0.51
   3  -2   2    7.31    0.96
   3  -2   2    7.57    0.61
  -3  -2  -2    6.73    0.51
  -3  -2  -2    7.11    0.52
   3   2   2    7.32    0.57
  -3   2  -2    7.47    0.60
   3   2   2    7.32    0.57
   3   2   2    7.48    0.37
   3   2   2    7.33    0.40
  -3   2  -2    7.27    0.50
   3   2   2    7.19    0.41
  -3   2  -2    6.78    0.55
  -3   2  -2    7.60    0.98
  -3   2  -2    7.60    0.98
   3   2   2    7.55    0.37
  -4  -2  -2  177.19    5.03
   4  -2   2  183.57    5.86
  -4  -2  -2  177.19    5.03
  -4  -2  -2  178.40    5.06
  -4  -2  -2  178.38    5.05
  -4  -2  -2  178.81    4.54
  -4  -2  -2  173.21    4.50
   4  -2   2  178.12    4.94
   4  -2   2  179.99    4.82
   4  -2   2  173.56    4.71
   4  -2   2  183.57    5.85
   4   2   2  178.29    5.17
  -4   2  -2  168.57    5.74
   4   2   2  183.34    4.54
   4   2   2  171.18    4.55
   4   2   2  172.77    4.50
  -4   2  -2  180.57    4.72
   4   2   2  178.28    5.17
  -4   2  -2  168.57    5.75
  -4   2  -2  180.38    4.92
  -4   2  -2  178.23    4.85
   5  -2   2   13.69    1.47
  -5  -2  -2   12.90    0.65
   5  -2   2   12.86    0.88
  -5  -2  -2   12.75    0.88
  -5  -2  -2   12.75    0.88
   5  -2   2   13.69    1.47
  -5  -2  -2   13.88    0.89
  -5  -2  -2   13.88    0.89
  -5  -2  -2   12.51    0.67
   5  -2   2   12.84    0.75
   5  -2   2   12.59    0.81
   5   2   2   12.83    0.66
   5   2   2   13.02    0.61
   5   2   2   11.76    0.66
  -5   2  -2   12.46    0.73
   5   2   2   13.50    0.96
  -5   2  -2   13.79    1.44
   5   2   2   13.50    0.96
  -5   2  -2   11.50    0.79
  -5   2  -2   13.10    0.88
  -5   2  -2   13.79    1.45
   5   2   2   13.14    0.61
  -6  -2  -2   10.20    0.65
   6  -2   2    8.67    1.23
  -6  -2  -2    9.52    0.61
  -6  -2  -2    9.97    0.84
   6  -2   2    8.18    0.63
   6  -2   2   10.22    0.83
  -6  -2  -2    9.97    0.84
   6  -2   2    8.67    1.23
  -6   2  -2    9.97    1.31
  -6   2  -2    9.83    0.68
   6   2   2   11.98    0.97
   6   2   2    9.67    0.64
   6   2   2   11.98    0.97
   6   2   2    9.83    0.57
   6   2   2   10.62    1.09
  -6   2  -2    9.19    0.86
   6   2   2   10.62    1.09
   6   2   2   10.16    0.57
  -6   2  -2    9.97    1.31
   7  -2   2    8.79    1.30
  -7  -2  -2   10.08    0.67
   7  -2   2   10.51    0.74
  -7  -2  -2   11.58    1.18
   7  -2   2    8.21    0.89
  -7  -2  -2    9.50    0.69
   7  -2   2    8.79    1.30
  -7  -2  -2   11.58    1.18
  -7   2  -2   11.57    0.74
  -7   2  -2   10.65    1.44
   7   2   2   10.73    0.74
   7   2   2   11.35    1.24
   7   2   2   10.74    0.63
  -7   2  -2   10.65    1.45
   7   2   2   11.16    1.23
   7   2   2   11.16    1.23
   7   2   2   10.86    0.64
  -7   2  -2   10.03    0.81
   7   2   2   11.35    1.24
   8  -2   2    2.74    0.47
   8  -2   2    3.16    0.60
   8  -2   2    5.35    1.07
   8  -2   2    5.35    1.06
  -8  -2  -2    3.62    0.69
  -8  -2  -2    3.62    0.69
  -8  -2  -2    3.56    0.50
  -8  -2  -2    2.67    0.46
  -8   2  -2    4.57    0.67
   8   2   2    3.63    0.78
   8   2   2    3.50    0.49
   8   2   2    5.27    0.89
   8   2   2    3.96    0.46
   8   2   2    3.55    0.45
   8   2   2    5.27    0.89
  -8   2  -2    2.47    0.72
   8   2   2    4.63    0.59
   8   2   2    3.63    0.78
  -8   2  -2    2.38    0.42
  -8   2  -2    2.47    0.72
   9  -2   2    0.13    0.26
  -9  -2  -2   -0.14    0.14
  -9  -2  -2    0.02    0.24
   9  -2   2    0.13    0.25
  -9  -2  -2   -0.14    0.14
   9  -2   2    0.20    0.30
   9  -2   2    0.09    0.32
   9   2   2    0.29    0.32
  -9   2  -2    0.12    0.30
   9   2   2    0.29    0.32
  -9   2  -2    0.12    0.30
   9   2   2    0.29    0.21
   9   2   2    0.18    0.20
  -9   2  -2    0.15    0.23
   9   2   2    0.30    0.30
  -9   2  -2   -0.10    0.29
   9   2   2   -0.11    0.21
   9   2   2    0.18    0.20
 -10  -2  -2    5.26    0.96
  10  -2   2    3.39    0.93
  10  -2   2    3.80    0.63
 -10  -2  -2    5.26    0.96
 -10  -2  -2    3.95    0.60
  10  -2   2    3.39    0.93
  10  -2   2    3.60    0.71
  10   2   2    3.62    0.52
  10   2   2    2.05    0.51
 -10   2  -2    3.84    0.91
 -10   2  -2    2.85    0.62
  10   2   2    4.03    0.90
  10   2   2    2.71    0.75
  10   2   2    2.71    0.75
  10   2   2    4.03    0.90
 -10   2  -2    3.84    0.91
 -11  -2  -2   31.81    1.58
  11  -2   2   32.57    1.60
  11  -2   2   30.43    1.83
  11   2   2   29.68    1.43
 -11   2  -2   33.67    1.82
  11   2   2   30.66    2.23
  11   2   2   30.65    2.23
  11   2   2   30.41    1.64
  12  -2   2    7.60    1.08
 -12  -2  -2    6.60    0.88
  12  -2   2    8.25    0.96
  12   2   2    9.60    1.52
  12   2   2    6.80    0.79
  12   2   2    7.73    0.98
 -12   2  -2    5.80    0.92
  12   2   2    9.65    1.52
  13  -2   2   56.83    2.82
 -13  -2  -2   62.15    2.57
  13  -2   2   62.17    2.57
 -13   2  -2   63.45    2.82
  13   2   2   64.41    2.44
  13   2   2   59.30    2.64
  13   2   2   54.30    3.45
  14  -2   2   11.34    1.20
  14  -2   2   11.56    1.42
 -14  -2  -2   11.59    1.23
  14   2   2   11.95    1.15
  14   2   2   12.02    1.32
 -14   2  -2   11.51    1.39
  15  -2   2   -0.25    0.50
  15  -2   2    0.73    0.52
 -15   2  -2   -0.25    0.60
  15   2   2    0.30    0.42
  16  -2   2    4.28    0.89
  16  -2   2    2.90    0.93
 -16   2  -2    2.66    0.94
  16   2   2    2.69    0.69
  17  -2   2    5.59    1.07
  17   2   2    4.57    0.86
  18  -2   2    0.25    0.61
  18   2   2    0.01    0.53
  20  -3  -2    5.71    1.35
  20  -3  -2    6.43    1.32
 -20   3   2    4.35    1.27
  20   3  -2    6.53    1.16
  19  -3  -2   16.44    2.15
  19  -3  -2   15.85    1.77
  19   3  -2   12.05    1.46
 -19   3   2   19.35    2.18
  18  -3  -2    9.20    1.59
  18  -3  -2    8.43    1.34
 -18   3   2    9.91    1.56
  18   3  -2    7.57    1.13
  18   3  -2   10.59    2.15
  18   3  -2   10.57    2.15
  17  -3  -2    8.39    1.25
 -17  -3   2    8.87    1.30
  17  -3  -2    7.67    1.45
  17   3  -2    8.53    1.14
 -17   3   2    5.82    1.27
  17   3  -2    7.73    1.72
  17   3  -2    7.73    1.72
  17   3  -2    7.74    1.28
  16  -3  -2    0.01    0.52
 -16  -3   2   -0.12    0.47
  16  -3  -2    0.04    0.54
  16   3  -2    0.46    0.55
  16   3  -2    0.46    0.55
 -16   3   2   -0.07    0.57
  16   3  -2    1.14    0.65
  16   3  -2    0.83    0.50
  15  -3  -2    5.55    0.96
 -15  -3   2    9.54    1.22
  15  -3  -2    8.63    1.39
  15   3  -2    4.52    1.25
  15   3  -2    7.35    0.98
  15   3  -2    4.52    1.25
  15   3  -2    7.33    1.16
 -15   3   2    7.84    1.29
 -14  -3   2   -0.22    0.39
  14  -3  -2    0.25    0.52
  14  -3  -2    0.89    0.55
  14   3  -2    0.02    0.36
  14   3  -2    0.35    0.56
  14   3  -2    0.35    0.56
  14   3  -2   -0.24    0.36
 -14   3   2   -0.67    0.41
  13  -3  -2    1.34    0.61
 -13  -3   2    2.32    0.65
  13  -3  -2    2.17    0.60
  13   3  -2    0.68    0.55
  13   3  -2    1.52    0.50
  13   3  -2    2.16    0.65
 -13   3   2    1.74    0.63
 -13   3   2    1.69    0.71
  13   3  -2    0.68    0.55
 -13   3   2    1.69    0.71
  12  -3  -2    0.26    0.42
 -12  -3   2   -0.10    0.35
  12  -3  -2   -0.39    0.33
  12   3  -2   -0.13    0.39
  12   3  -2    0.60    0.35
 -12   3   2    0.11    0.32
  12   3  -2    0.11    0.37
 -12   3   2   -0.04    0.38
 -12   3   2    0.11    0.32
  12   3  -2   -0.13    0.39
 -12   3   2   -0.44    0.31
  11  -3  -2   37.28    2.88
 -11  -3   2   39.01    2.62
 -11  -3   2   39.01    2.62
  11  -3  -2   39.10    2.16
  11  -3  -2   37.28    2.88
 -11  -3   2   42.53    1.93
  11  -3  -2   38.15    1.81
 -11   3   2   42.40    2.11
  11   3  -2   36.90    2.65
 -11   3   2   35.42    2.81
 -11   3   2   40.13    1.84
  11   3  -2   39.34    1.74
 -11   3   2   35.42    2.81
  11   3  -2   36.90    2.65
  11   3  -2   41.10    2.02
 -10  -3   2  139.45    4.38
 -10  -3   2  139.32    5.59
 -10  -3   2  139.32    5.59
 -10  -3   2  137.04    4.06
  10  -3  -2  136.54    4.77
  10  -3  -2  144.80    6.16
  10  -3  -2  144.79    6.17
  10  -3  -2  146.55    4.38
  10   3  -2  135.18    5.67
  10   3  -2  142.67    4.22
  10   3  -2  135.18    5.67
 -10   3   2  149.21    4.38
 -10   3   2  150.38    6.21
 -10   3   2  150.39    6.22
  10   3  -2  129.16    4.45
 -10   3   2  137.87    4.61
  -9  -3   2    6.41    0.78
   9  -3  -2    6.69    0.77
   9  -3  -2    6.90    1.35
  -9  -3   2    4.77    1.01
   9  -3  -2    6.90    1.35
   9  -3  -2    5.00    0.84
  -9  -3   2    6.14    0.62
  -9  -3   2    4.77    1.01
  -9   3   2    5.42    1.20
   9   3  -2    5.58    0.64
  -9   3   2    5.42    1.20
   9   3  -2    5.31    1.05
   9   3  -2    5.34    0.75
  -9   3   2    4.94    0.66
  -9   3   2    6.59    0.88
   9   3  -2    5.31    1.05
   8  -3  -2  181.15    5.59
  -8  -3   2  186.79    5.25
  -8  -3   2  171.28    6.28
   8  -3  -2  192.82    6.97
  -8  -3   2  182.53    4.99
   8  -3  -2  191.62    5.22
   8  -3  -2  192.82    6.97
  -8  -3   2  171.28    6.28
   8   3  -2  181.03    5.08
  -8   3   2  173.51    5.39
  -8   3   2  172.31    6.75
  -8   3   2  172.32    6.76
  -8   3   2  189.75    5.23
   8   3  -2  187.76    5.38
   8   3  -2  185.16    6.53
   8   3  -2  185.15    6.52
   7  -3  -2    0.15    0.29
   7  -3  -2   -0.06    0.27
   7  -3  -2    0.15    0.23
  -7  -3   2    0.15    0.24
  -7  -3   2    0.15    0.24
  -7  -3   2   -0.12    0.20
   7  -3  -2    0.15    0.29
  -7  -3   2   -0.05    0.15
   7   3  -2   -0.15    0.21
  -7   3   2   -0.03    0.33
  -7   3   2    0.43    0.30
   7   3  -2    0.27    0.22
   7   3  -2   -0.03    0.27
  -7   3   2   -0.09    0.22
  -7   3   2   -0.03    0.33
   7   3  -2   -0.03    0.27
   6  -3  -2   12.19    1.54
  -6  -3   2   11.25    1.28
   6  -3  -2   10.29    0.99
  -6  -3   2   11.69    0.80
  -6  -3   2   11.25    1.28
   6  -3  -2   10.27    0.73
   6  -3  -2   12.19    1.54
  -6  -3   2    8.83    0.60
   6   3  -2   11.50    1.37
   6   3  -2   10.28    0.67
   6   3  -2   10.16    0.78
  -6   3   2   14.21    1.66
   6   3  -2   11.50    1.37
  -6   3   2   10.30    0.75
  -6   3   2   14.21    1.66
  -6   3   2   10.46    0.83
  -6   3   2   13.27    1.55
  -6   3   2   13.28    1.55
  -5  -3   2   70.34    2.14
   5  -3  -2   70.34    3.22
   5  -3  -2   70.34    3.22
  -5  -3   2   67.13    2.97
  -5  -3   2   67.13    2.97
  -5  -3   2   69.17    2.31
   5  -3  -2   65.45    2.47
  -5  -3   2   73.70    2.36
   5  -3  -2   73.15    2.24
   5   3  -2   71.05    2.33
   5   3  -2   69.75    2.18
   5   3  -2   70.56    3.06
  -5   3   2   69.95    2.42
  -5   3   2   75.18    3.32
   5   3  -2   70.56    3.05
  -5   3   2   75.18    3.32
   5   3  -2   71.23    2.38
  -5   3   2   72.39    2.28
  -5   3   2   66.28    3.08
  -5   3   2   65.74    3.06
   4  -3  -2   30.62    1.20
  -4  -3   2   32.68    1.17
  -4  -3   2   33.19    1.34
  -4  -3   2   30.70    1.78
   4  -3  -2   34.37    1.98
  -4  -3   2   30.70    1.78
   4  -3  -2   34.37    1.98
   4  -3  -2   32.23    1.43
   4  -3  -2   30.57    1.33
  -4  -3   2   33.51    1.34
   4   3  -2   30.83    1.32
  -4   3   2   32.28    1.94
  -4   3   2   32.27    1.94
  -4   3   2   31.72    1.25
   4   3  -2   33.87    1.23
   4   3  -2   31.86    1.33
   4   3  -2   30.15    1.80
   4   3  -2   30.15    1.80
  -4   3   2   33.04    1.44
  -4   3   2   31.64    1.35
  -3  -3   2    3.28    0.45
   3  -3  -2    3.47    0.68
   3  -3  -2    3.55    0.45
  -3  -3   2    2.54    0.33
   3  -3  -2    2.92    0.47
   3  -3  -2    3.43    0.38
  -3  -3   2    4.36    0.52
   3  -3  -2    3.47    0.68
  -3  -3   2    3.06    0.64
  -3  -3   2    3.06    0.64
   3   3  -2    3.96    0.74
  -3   3   2    3.66    0.73
   3   3  -2    3.24    0.39
  -3   3   2    3.00    0.38
   3   3  -2    3.48    0.47
  -3   3   2    3.00    0.46
  -3   3   2    3.66    0.73
   3   3  -2    3.96    0.74
  -3   3   2    3.88    0.48
   3   3  -2    3.20    0.46
   2  -3  -2   62.84    1.93
  -2  -3   2   66.15    2.12
   2  -3  -2   64.67    2.67
   2  -3  -2   69.53    2.17
   2  -3  -2   64.67    2.67
  -2  -3   2   64.85    2.71
  -2  -3   2   64.85    2.72
   2  -3  -2   67.43    2.08
  -2  -3   2   67.45    2.15
   2   3  -2   65.07    2.13
  -2   3   2   66.18    1.98
   2   3  -2   62.87    2.73
  -2   3   2   68.07    2.15
  -2   3   2   68.33    2.76
  -2   3   2   68.33    2.76
   2   3  -2   66.42    2.14
   2   3  -2   62.87    2.73
  -2   3   2   67.58    2.09
   2   3  -2   66.94    2.00
   1  -3  -2    4.48    0.44
  -1  -3   2    5.07    0.54
  -1  -3   2    4.28    0.41
   1  -3  -2    5.16    0.50
   1  -3  -2    4.94    0.72
  -1  -3   2    6.40    0.87
   1  -3  -2    4.94    0.71
  -1  -3   2    5.35    0.55
  -1  -3   2    6.40    0.87
   1  -3  -2    4.66    0.36
  -1   3   2    4.05    0.45
   1   3  -2    4.81    0.45
  -1   3   2    3.90    0.64
   1   3  -2    4.74    0.78
  -1   3   2    5.10    0.40
  -1   3   2    3.90    0.64
   1   3  -2    4.74    0.78
   1   3  -2    5.05    0.53
  -1   3   2    4.04    0.43
   1   3  -2    4.13    0.49
   0  -3   2    0.70    0.37
   0  -3   2    0.04    0.23
   0  -3   2    0.35    0.19
   0  -3   2    0.49    0.25
   0  -3   2    0.70    0.37
   0  -3  -2    0.36    0.19
   0  -3  -2    0.37    0.27
   0  -3  -2    0.24    0.19
   0  -3  -2    0.37    0.27
   0   3  -2    0.03    0.29
   0   3   2    0.09    0.19
   0   3  -2    0.37    0.24
   0   3   2    0.18    0.11
   0   3   2    0.23    0.19
   0   3   2    0.65    0.34
   0   3  -2    0.03    0.29
   0   3  -2    0.39    0.21
   0   3   2    0.12    0.15
   0   3  -2    0.18    0.22
   0   3   2    0.65    0.34
  -1  -3  -2    5.23    0.41
   1  -3   2    4.99    0.46
   1  -3   2    5.61    0.56
  -1  -3  -2    5.51    0.41
   1  -3   2    5.35    0.86
   1  -3   2    5.35    0.86
   1  -3   2    6.02    0.61
  -1  -3  -2    5.28    0.64
  -1  -3  -2    5.28    0.64
   1   3   2    5.53    0.67
   1   3   2    5.53    0.67
   1   3   2    5.02    0.34
   1   3   2    5.38    0.38
   1   3   2    5.35    0.39
  -1   3  -2    4.74    0.55
  -1   3  -2    5.45    0.88
  -1   3  -2    6.29    0.61
   1   3   2    6.16    0.45
  -1   3  -2    6.33    0.51
  -1   3  -2    5.45    0.88
  -2  -3  -2  232.48    6.32
   2  -3   2  219.77    5.98
   2  -3   2  229.29    5.89
  -2  -3  -2  224.86    5.68
  -2  -3  -2  228.48    5.70
  -2  -3  -2  232.44    6.31
   2  -3   2  223.60    7.06
   2  -3   2  223.59    7.06
   2  -3   2  225.76    6.09
   2   3   2  224.60    5.68
  -2   3  -2  220.82    6.02
   2   3   2  228.54    5.70
  -2   3  -2  225.93    6.07
   2   3   2  226.55    6.41
   2   3   2  223.08    5.65
   2   3   2  226.56    6.40
  -2   3  -2  229.12    7.09
   2   3   2  228.77    5.71
  -2   3  -2  229.11    7.09
  -2   3  -2  222.22    5.90
   3  -3   2  110.08    3.28
  -3  -3  -2  123.47    3.14
   3  -3   2  112.53    3.53
   3  -3   2  114.16    3.44
  -3  -3  -2  115.37    3.12
   3  -3   2  113.63    4.35
   3  -3   2  113.63    4.35
  -3  -3  -2  115.23    3.60
  -3  -3  -2  115.24    3.60
   3   3   2  115.79    3.07
  -3   3  -2  119.74    3.55
  -3   3  -2  122.22    4.45
   3   3   2  116.26    3.06
   3   3   2  121.03    3.15
  -3   3  -2  115.38    3.32
   3   3   2  121.52    3.73
   3   3   2  117.21    3.15
  -3   3  -2  112.33    3.45
  -3   3  -2  122.22    4.45
   3   3   2  121.51    3.73
   4  -3   2   55.26    1.93
  -4  -3  -2   58.39    1.79
  -4  -3  -2   60.00    1.82
  -4  -3  -2   56.94    2.17
  -4  -3  -2   57.80    2.16
  -4  -3  -2   56.94    2.17
   4  -3   2   60.96    2.22
   4  -3   2   59.53    2.87
  -4  -3  -2   57.80    2.17
   4  -3   2   59.53    2.87
  -4   3  -2   56.74    1.95
   4   3   2   61.56    1.75
   4   3   2   64.74    2.37
   4   3   2   61.48    1.73
  -4   3  -2   60.12    2.15
  -4   3  -2   61.80    2.94
   4   3   2   59.30    1.81
   4   3   2   64.74    2.37
   4   3   2   59.12    1.83
  -4   3  -2   61.80    2.94
  -5  -3  -2  182.94    4.83
   5  -3   2  191.85    6.49
  -5  -3  -2  179.72    5.45
  -5  -3  -2  189.15    4.82
   5  -3   2  189.64    5.36
  -5  -3  -2  179.70    5.46
   5  -3   2  192.59    5.07
   5  -3   2  191.85    6.49
  -5   3  -2  174.28    6.35
   5   3   2  183.94    4.83
   5   3   2  182.59    5.64
   5   3   2  182.43    4.78
   5   3   2  189.92    4.78
  -5   3  -2  177.86    5.02
  -5   3  -2  174.30    6.35
   5   3   2  179.61    4.86
   5   3   2  182.58    5.64
  -5   3  -2  185.24    5.24
   6  -3   2   67.11    3.37
  -6  -3  -2   68.02    2.66
  -6  -3  -2   68.02    2.66
  -6  -3  -2   67.29    2.13
   6  -3   2   67.11    3.37
   6  -3   2   69.10    2.31
   6  -3   2   71.81    2.65
  -6  -3  -2   65.89    2.16
  -6   3  -2   71.35    2.54
   6   3   2   69.28    2.21
   6   3   2   71.80    2.09
  -6   3  -2   73.40    3.48
   6   3   2   69.59    2.83
  -6   3  -2   68.75    2.31
  -6   3  -2   73.40    3.48
   6   3   2   69.22    2.17
   6   3   2   69.60    2.83
   6   3   2   68.80    2.08
   7  -3   2   65.79    3.43
  -7  -3  -2   70.00    2.15
   7  -3   2   65.79    3.43
  -7  -3  -2   63.32    2.66
  -7  -3  -2   63.32    2.66
   7  -3   2   65.19    2.27
  -7  -3  -2   65.16    2.16
   7  -3   2   62.44    2.55
  -7   3  -2   65.51    3.40
   7   3   2   65.01    2.85
   7   3   2   65.01    2.85
  -7   3  -2   62.48    2.46
  -7   3  -2   65.52    3.40
   7   3   2   67.55    2.21
   7   3   2   65.63    2.14
  -7   3  -2   60.26    2.22
   7   3   2   63.44    2.03
   7   3   2   66.14    2.05
  -8  -3  -2    6.34    0.65
  -8  -3  -2    5.38    0.62
   8  -3   2    7.20    1.31
  -8  -3  -2    5.61    0.87
  -8  -3  -2    5.61    0.87
   8  -3   2    5.56    0.68
   8  -3   2    6.44    0.90
   8  -3   2    7.20    1.31
   8   3   2    7.23    1.06
   8   3   2    5.23    0.54
  -8   3  -2    6.06    0.83
   8   3   2    6.97    0.68
  -8   3  -2    5.94    1.19
   8   3   2    7.23    1.06
   8   3   2    6.18    0.68
   8   3   2    6.24    0.58
  -8   3  -2    5.94    1.19
  -8   3  -2    5.99    0.70
   9  -3   2   26.42    2.67
   9  -3   2   17.84    1.17
  -9  -3  -2   21.00    1.11
  -9  -3  -2   22.13    1.52
  -9  -3  -2   22.13    1.52
   9  -3   2   19.93    1.40
   9  -3   2   26.42    2.67
   9   3   2   23.11    1.70
  -9   3  -2   19.81    1.33
   9   3   2   18.92    1.02
   9   3   2   21.93    1.20
  -9   3  -2   20.20    2.28
  -9   3  -2   19.21    1.16
   9   3   2   23.11    1.70
  -9   3  -2   20.20    2.27
   9   3   2   22.01    1.05
  10  -3   2   -0.28    0.21
  10  -3   2   -0.28    0.21
 -10  -3  -2    0.78    0.37
  10  -3   2    0.41    0.35
 -10  -3  -2    0.49    0.27
  10  -3   2    0.73    0.44
 -10  -3  -2    0.49    0.27
 -10   3  -2    0.28    0.40
 -10   3  -2    0.47    0.42
  10   3   2    0.65    0.32
  10   3   2    0.00    0.24
  10   3   2    0.00    0.24
  10   3   2    0.89    0.38
 -10   3  -2    0.28    0.40
  11  -3   2    0.81    0.50
 -11  -3  -2    2.53    0.56
  11  -3   2    2.30    0.57
  11   3   2    4.01    0.68
  11   3   2    3.07    0.85
 -11   3  -2    2.52    0.67
  11   3   2    3.07    0.84
  11   3   2    2.90    0.52
  12  -3   2    7.32    0.94
  12  -3   2    5.69    1.01
 -12  -3  -2    8.09    0.95
  12   3   2    7.45    1.33
  12   3   2    7.45    1.33
 -12   3  -2    7.67    1.12
  12   3   2    8.30    0.85
  12   3   2    7.25    0.94
  13  -3   2   59.70    2.59
 -13  -3  -2   61.16    2.47
  13  -3   2   58.42    2.92
  13   3   2   57.73    2.55
  13   3   2   60.09    3.51
 -13   3  -2   51.60    2.67
  13   3   2   60.11    3.51
  13   3   2   55.06    2.27
  14  -3   2    2.22    0.66
  14  -3   2    1.76    0.77
 -14   3  -2    1.10    0.70
  14   3   2    2.42    0.79
  14   3   2    2.31    0.79
  14   3   2    1.39    0.50
  15  -3   2   37.33    2.11
  15  -3   2   35.99    2.41
  15   3   2   41.17    1.95
 -15   3  -2   33.24    2.26
  15   3   2   36.56    2.92
  16  -3   2    0.71    0.65
  16  -3   2   -0.17    0.59
  16   3   2    0.00    0.41
 -16   3  -2    0.42    0.67
  17  -3   2   -0.30    0.65
  17  -3   2   -0.50    0.53
  17   3   2    0.48    0.50
  18  -3   2    0.68    0.72
  18   3   2    0.99    0.57
  19  -4  -2    3.20    1.04
  19  -4  -2    3.02    1.05
  19   4  -2    4.42    0.94
 -19   4   2    6.46    1.41
  18  -4  -2   12.18    1.86
  18  -4  -2   10.07    1.44
  18   4  -2    7.53    1.13
 -18   4   2    9.60    1.64
 -17  -4   2    2.46    0.86
  17  -4  -2    2.04    0.95
  17  -4  -2    3.84    0.97
  17   4  -2   -0.23    0.59
  17   4  -2    3.37    0.94
  17   4  -2    3.64    0.82
 -17   4   2    2.65    0.94
  17   4  -2   -0.23    0.59
 -16  -4   2    9.55    1.26
  16  -4  -2    7.62    1.40
  16  -4  -2    9.94    1.30
 -16   4   2    8.77    1.40
  16   4  -2    8.29    1.74
  16   4  -2    8.29    1.74
  16   4  -2   10.69    1.19
  16   4  -2   10.18    1.39
 -15  -4   2    2.10    0.75
  15  -4  -2    2.42    0.74
  15  -4  -2    1.31    0.73
  15   4  -2    1.74    0.57
  15   4  -2    0.97    0.66
  15   4  -2    0.97    0.66
 -15   4   2    2.70    0.87
  15   4  -2    2.18    0.71
 -14  -4   2    8.44    1.13
  14  -4  -2    8.09    1.31
  14  -4  -2    6.91    1.04
  14   4  -2    8.89    1.22
  14   4  -2    8.73    1.72
 -14   4   2    6.20    1.13
  14   4  -2    6.25    0.89
  14   4  -2    8.74    1.72
  13  -4  -2   16.04    1.29
 -13  -4   2   15.86    1.27
  13  -4  -2   11.60    1.47
 -13   4   2   13.26    1.49
 -13   4   2    9.58    1.94
 -13   4   2    9.58    1.94
  13   4  -2   14.13    2.07
  13   4  -2   13.53    1.07
  13   4  -2   14.13    2.07
  13   4  -2   10.89    1.29
  12  -4  -2   13.22    1.57
  12  -4  -2   12.47    1.25
 -12  -4   2   14.22    1.15
  12   4  -2   12.94    1.04
  12   4  -2   12.95    1.32
 -12   4   2   14.13    1.30
  12   4  -2   15.46    2.08
  12   4  -2   15.46    2.08
 -12   4   2   14.22    2.27
 -12   4   2   14.22    2.27
 -12   4   2   16.42    1.63
 -11  -4   2    1.35    0.48
  11  -4  -2    1.20    0.47
 -11  -4   2    0.52    0.41
  11  -4  -2    2.36    0.69
 -11  -4   2    0.52    0.41
  11   4  -2    1.08    0.56
 -11   4   2    2.58    0.97
 -11   4   2    1.35    0.54
 -11   4   2    1.48    0.55
  11   4  -2    1.08    0.56
  11   4  -2    1.27    0.41
 -11   4   2    2.58    0.96
  11   4  -2    1.27    0.48
 -10  -4   2   18.05    2.04
 -10  -4   2   18.05    2.04
  10  -4  -2   17.41    1.18
 -10  -4   2   15.73    1.13
  10  -4  -2   14.22    1.45
  10   4  -2   17.01    1.23
  10   4  -2   13.65    1.80
 -10   4   2   18.55    2.37
 -10   4   2   15.28    1.14
 -10   4   2   18.55    2.36
  10   4  -2   15.25    1.03
  10   4  -2   13.65    1.80
 -10   4   2   16.96    1.32
  -9  -4   2  143.26    4.44
   9  -4  -2  143.63    4.41
   9  -4  -2  142.00    4.87
   9  -4  -2  150.76    6.28
  -9  -4   2  150.01    5.65
  -9  -4   2  150.01    5.64
  -9  -4   2  147.51    4.16
   9  -4  -2  150.76    6.28
  -9   4   2  137.12    6.08
   9   4  -2  138.45    5.70
  -9   4   2  136.88    4.68
  -9   4   2  137.12    6.09
   9   4  -2  138.45    5.71
   9   4  -2  141.98    4.56
  -9   4   2  148.43    4.45
   9   4  -2  152.46    4.32
  -8  -4   2    8.92    1.31
   8  -4  -2    5.77    0.69
  -8  -4   2    8.92    1.31
   8  -4  -2    5.36    1.15
  -8  -4   2    6.57    0.77
  -8  -4   2    7.36    0.60
   8  -4  -2    7.54    1.02
   8  -4  -2    5.36    1.15
   8   4  -2    5.88    1.10
   8   4  -2    6.16    0.67
   8   4  -2    5.88    1.10
  -8   4   2    8.21    0.96
   8   4  -2    7.24    0.84
  -8   4   2    7.51    0.80
  -8   4   2    6.22    1.29
  -8   4   2    6.22    1.29
  -7  -4   2   15.04    0.84
   7  -4  -2   16.86    2.00
   7  -4  -2   17.72    1.02
  -7  -4   2   16.76    1.04
  -7  -4   2   15.71    1.69
   7  -4  -2   16.86    2.00
  -7  -4   2   15.71    1.69
   7  -4  -2   16.29    1.16
   7   4  -2   17.49    1.83
  -7   4   2   15.87    1.95
  -7   4   2   16.67    1.02
  -7   4   2   15.18    1.09
   7   4  -2   14.13    1.01
   7   4  -2   17.49    1.83
   7   4  -2   15.75    0.92
  -7   4   2   15.87    1.95
   6  -4  -2    1.78    0.65
  -6  -4   2    3.72    0.45
   6  -4  -2    3.69    0.52
  -6  -4   2    2.51    0.47
   6  -4  -2    1.78    0.65
   6  -4  -2    2.58    0.57
  -6   4   2    3.74    0.90
   6   4  -2    3.47    0.55
  -6   4   2    2.68    0.53
  -6   4   2    2.92    0.49
   6   4  -2    2.80    0.42
   6   4  -2    3.77    0.84
   6   4  -2    3.77    0.84
  -6   4   2    4.34    0.96
  -6   4   2    3.74    0.90
   5  -4  -2    8.49    0.66
  -5  -4   2    8.88    0.71
   5  -4  -2   10.11    1.39
  -5  -4   2    8.48    0.60
   5  -4  -2   10.11    1.39
   5  -4  -2    9.29    0.94
  -5   4   2   10.22    1.45
  -5   4   2   10.22    1.45
   5   4  -2    7.91    0.78
   5   4  -2    7.78    0.61
   5   4  -2    7.81    1.14
  -5   4   2    7.90    0.74
   5   4  -2    7.81    1.14
  -5   4   2    8.38    0.86
   4  -4  -2    0.93    0.29
  -4  -4   2    0.91    0.33
   4  -4  -2    0.74    0.42
  -4  -4   2    1.04    0.27
  -4  -4   2    0.51    0.35
   4  -4  -2    0.81    0.36
   4  -4  -2    0.74    0.42
  -4  -4   2    0.51    0.35
   4   4  -2    0.66    0.43
  -4   4   2    0.82    0.50
   4   4  -2    0.66    0.43
   4   4  -2    0.63    0.25
  -4   4   2    0.75    0.32
  -4   4   2    0.82    0.50
  -4   4   2    1.08    0.32
   4   4  -2    0.82    0.31
   4   4  -2    1.12    0.35
  -3  -4   2  106.51    4.06
   3  -4  -2  104.38    3.32
  -3  -4   2  107.50    3.25
   3  -4  -2  101.69    3.03
   3  -4  -2  107.06    4.14
  -3  -4   2  106.52    4.06
   3  -4  -2  107.06    4.14
  -3  -4   2  107.80    3.23
   3  -4  -2  101.44    3.19
   3   4  -2  104.29    3.06
   3   4  -2  107.25    4.12
   3   4  -2  107.24    4.12
   3   4  -2  106.57    3.25
  -3   4   2  106.96    3.25
  -3   4   2  105.90    4.19
  -3   4   2  108.27    3.11
  -3   4   2  105.90    4.18
  -3   4   2  102.48    3.29
   3   4  -2  107.15    3.26
  -2  -4   2   28.92    1.79
   2  -4  -2   26.63    1.07
   2  -4  -2   28.99    1.75
   2  -4  -2   28.98    1.75
  -2  -4   2   28.91    1.78
  -2  -4   2   26.38    1.26
  -2  -4   2   27.25    1.09
   2  -4  -2   26.82    1.27
  -2  -4   2   28.24    1.26
   2  -4  -2   29.75    1.24
  -2   4   2   28.17    1.24
   2   4  -2   32.74    1.35
  -2   4   2   25.55    1.71
   2   4  -2   27.43    1.14
   2   4  -2   31.30    1.89
  -2   4   2   27.30    1.12
  -2   4   2   25.55    1.71
   2   4  -2   31.30    1.89
   2   4  -2   25.95    1.25
  -2   4   2   29.97    1.31
   1  -4  -2    2.90    0.64
  -1  -4   2    4.41    0.46
   1  -4  -2    4.26    0.40
  -1  -4   2    3.77    0.54
  -1  -4   2    4.28    0.54
  -1  -4   2    3.95    0.79
   1  -4  -2    2.90    0.64
   1  -4  -2    4.40    0.50
  -1  -4   2    3.95    0.79
   1  -4  -2    4.49    0.54
  -1   4   2    4.10    0.76
  -1   4   2    4.63    0.46
   1   4  -2    3.55    0.76
   1   4  -2    4.44    0.48
  -1   4   2    4.10    0.76
   1   4  -2    3.94    0.54
   1   4  -2    3.95    0.54
   1   4  -2    3.55    0.76
  -1   4   2    4.78    0.56
  -1   4   2    4.79    0.53
   0  -4  -2   67.52    2.73
   0  -4  -2   65.37    1.95
   0  -4   2   69.64    3.05
   0  -4   2   69.82    2.30
   0  -4  -2   68.84    2.18
   0  -4   2   66.43    2.10
   0  -4  -2   67.79    2.12
   0  -4   2   69.64    3.05
   0  -4  -2   67.53    2.73
   0  -4   2   64.34    2.30
   0   4  -2   69.61    2.35
   0   4   2   65.89    2.75
   0   4   2   67.65    2.03
   0   4  -2   66.03    2.30
   0   4   2   65.90    2.76
   0   4  -2   69.40    3.07
   0   4   2   69.06    2.19
   0   4  -2   64.38    2.12
   0   4  -2   69.40    3.07
   0   4   2   66.72    2.12
   1  -4   2   22.67    1.20
  -1  -4  -2   22.76    0.98
   1  -4   2   22.12    1.64
  -1  -4  -2   22.32    1.00
  -1  -4  -2   24.02    1.40
   1  -4   2   22.27    1.01
   1  -4   2   22.12    1.64
  -1  -4  -2   24.02    1.39
  -1   4  -2   23.51    1.18
  -1   4  -2   24.55    1.74
   1   4   2   23.03    1.02
  -1   4  -2   23.38    1.05
  -1   4  -2   24.55    1.74
   1   4   2   22.33    1.40
   1   4   2   22.33    1.40
   1   4   2   23.55    0.89
   1   4   2   22.54    0.92
   1   4   2   24.62    1.02
   2  -4   2   53.11    2.72
  -2  -4  -2   54.47    1.74
  -2  -4  -2   48.11    2.14
  -2  -4  -2   54.84    1.72
  -2  -4  -2   48.11    2.14
   2  -4   2   49.64    1.77
   2  -4   2   51.00    2.02
   2  -4   2   53.11    2.72
  -2   4  -2   50.05    1.80
  -2   4  -2   52.46    2.74
   2   4   2   52.49    2.27
   2   4   2   50.90    1.61
   2   4   2   52.49    2.27
  -2   4  -2   53.11    1.99
   2   4   2   52.66    1.59
   2   4   2   53.59    1.73
  -2   4  -2   52.46    2.74
   2   4   2   54.03    1.75
  -3  -4  -2   18.34    0.86
  -3  -4  -2   19.28    0.86
   3  -4   2   19.56    1.60
   3  -4   2   19.56    1.59
   3  -4   2   19.39    1.15
   3  -4   2   17.61    0.93
  -3   4  -2   17.69    0.98
  -3   4  -2   18.45    1.09
   3   4   2   17.87    0.78
   3   4   2   17.82    1.20
   3   4   2   18.29    0.75
   3   4   2   18.07    0.85
  -3   4  -2   20.41    1.71
   3   4   2   18.66    0.87
  -3   4  -2   20.41    1.71
   3   4   2   17.82    1.20
  -4  -4  -2  112.51    3.18
   4  -4   2  111.43    4.62
   4  -4   2  111.43    4.62
   4  -4   2  117.53    3.73
  -4  -4  -2  110.26    3.19
   4  -4   2  113.28    3.38
   4   4   2  114.14    3.95
  -4   4  -2  112.10    4.67
  -4   4  -2  109.83    3.58
  -4   4  -2  110.03    3.37
   4   4   2  114.20    3.22
  -4   4  -2  112.10    4.67
   4   4   2  114.47    3.12
   4   4   2  117.36    3.23
   4   4   2  114.37    3.09
   4   4   2  114.14    3.94
  -5  -4  -2   11.00    0.89
  -5  -4  -2   13.10    0.73
   5  -4   2   15.19    1.80
   5  -4   2   15.19    1.80
  -5  -4  -2   11.00    0.89
   5  -4   2   11.54    0.81
  -5  -4  -2   12.29    0.71
   5  -4   2   12.79    1.03
  -5   4  -2   12.50    0.84
  -5   4  -2   14.20    1.02
   5   4   2   12.57    1.04
  -5   4  -2   14.74    1.80
  -5   4  -2   14.74    1.79
   5   4   2   12.57    1.04
   5   4   2   13.56    0.74
   5   4   2   11.16    0.70
   5   4   2   11.16    0.62
   5   4   2   11.73    0.65
  -6  -4  -2    4.68    0.52
  -6  -4  -2    5.50    0.56
   6  -4   2    3.19    0.63
  -6  -4  -2    6.23    0.81
   6  -4   2    3.87    0.98
   6  -4   2    3.72    0.54
  -6  -4  -2    6.23    0.81
   6  -4   2    3.87    0.98
  -6   4  -2    4.10    0.56
   6   4   2    4.44    0.55
  -6   4  -2    5.93    1.16
  -6   4  -2    5.93    1.16
   6   4   2    5.99    0.88
   6   4   2    5.99    0.88
   6   4   2    4.68    0.46
   6   4   2    5.52    0.50
  -6   4  -2    4.93    0.72
   6   4   2    4.97    0.54
  -7  -4  -2   24.12    1.14
   7  -4   2   27.07    2.15
   7  -4   2   25.14    1.32
   7  -4   2   23.49    1.50
  -7  -4  -2   27.33    1.57
   7  -4   2   27.07    2.15
  -7  -4  -2   25.27    1.17
  -7  -4  -2   27.33    1.57
   7   4   2   27.05    1.10
   7   4   2   26.16    1.22
  -7   4  -2   25.07    2.57
  -7   4  -2   25.91    1.31
   7   4   2   24.84    1.66
  -7   4  -2   25.07    2.57
   7   4   2   24.84    1.66
   7   4   2   27.40    1.11
   7   4   2   26.29    1.18
  -7   4  -2   24.71    1.46
   8  -4   2    8.02    1.49
  -8  -4  -2    7.28    0.72
  -8  -4  -2    7.43    1.00
   8  -4   2    8.02    1.49
   8  -4   2    7.28    0.99
  -8  -4  -2    7.43    1.00
   8  -4   2    8.19    0.86
  -8   4  -2    7.73    1.46
   8   4   2    7.63    1.11
  -8   4  -2    7.66    0.81
   8   4   2    7.63    1.12
   8   4   2    8.63    0.63
   8   4   2    7.25    0.66
  -8   4  -2    8.95    1.05
  -8   4  -2    7.73    1.46
   8   4   2    8.66    0.81
   9  -4   2    9.10    1.17
  -9  -4  -2    7.35    1.02
   9  -4   2    9.93    0.99
   9  -4   2   12.56    1.92
  -9  -4  -2    7.35    1.02
   9  -4   2   12.56    1.92
  -9  -4  -2    8.75    0.83
   9   4   2    9.52    0.71
  -9   4  -2   10.35    1.00
   9   4   2   10.60    0.96
  -9   4  -2    9.66    1.11
  -9   4  -2    7.36    1.47
   9   4   2    8.33    1.21
  -9   4  -2    7.36    1.47
   9   4   2    8.33    1.21
 -10  -4  -2    1.69    0.46
  10  -4   2    1.50    0.59
  10  -4   2    2.64    0.59
 -10   4  -2    1.61    0.60
  10   4   2    1.07    0.54
  10   4   2    1.07    0.54
  10   4   2    2.22    0.51
 -10   4  -2    3.02    0.94
  10   4   2    2.37    0.44
 -10   4  -2    3.02    0.94
  11  -4   2   50.57    2.22
  11  -4   2   45.37    2.48
 -11  -4  -2   45.55    1.97
 -11   4  -2   48.07    2.42
  11   4   2   49.10    2.88
  11   4   2   48.48    1.91
  11   4   2   49.10    2.88
  11   4   2   45.75    2.06
 -12  -4  -2    1.26    0.49
  12  -4   2    1.37    0.56
  12  -4   2    1.20    0.64
  12   4   2    0.91    0.45
 -12   4  -2    0.87    0.59
  12   4   2    0.51    0.45
  12   4   2    0.75    0.41
  12   4   2    0.51    0.45
  13  -4   2   21.71    1.52
  13  -4   2   21.62    2.03
  13   4   2   20.85    1.27
  13   4   2   21.99    2.36
  13   4   2   21.99    2.36
 -13   4  -2   20.36    1.91
  14  -4   2   11.78    1.57
  14  -4   2   13.72    1.46
  14   4   2   13.20    1.93
 -14   4  -2   11.75    1.56
  14   4   2   13.20    1.92
  14   4   2   15.90    1.14
  15  -4   2    0.33    0.68
  15  -4   2    0.46    0.57
  15   4   2    0.45    0.46
  15   4   2    0.18    0.38
 -15   4  -2   -0.15    0.61
  15   4   2    0.17    0.38
  16  -4   2    2.99    0.97
  16  -4   2    1.27    0.74
  16   4   2    4.29    0.79
 -16   4  -2    4.88    1.13
  16   4   2    1.22    0.69
  17  -4   2    2.61    0.90
  17  -4   2    2.63    1.03
  17   4   2    3.19    0.73
 -17   4  -2    2.68    1.05
  18  -4   2    0.23    0.73
  18   4   2    1.09    0.60
 -19   5   2    8.44    1.57
  19   5  -2   10.28    1.35
  18  -5  -2    7.40    1.32
  18  -5  -2    8.57    1.57
 -18   5   2    5.95    1.31
  18   5  -2    7.81    1.15
  17  -5  -2    7.67    1.28
  17  -5  -2    7.79    1.54
  17   5  -2    8.62    1.16
 -17   5   2    5.84    1.31
  17   5  -2    9.42    1.94
  17   5  -2    9.42    1.94
  16  -5  -2    8.13    1.27
  16  -5  -2    6.88    1.36
 -16  -5   2    6.70    1.13
  16   5  -2    7.25    1.66
  16   5  -2    7.25    1.66
 -16   5   2    5.71    1.25
  16   5  -2    5.39    0.93
  16   5  -2    6.48    1.15
  15  -5  -2    0.09    0.58
 -15  -5   2    0.41    0.58
  15  -5  -2    0.49    0.65
  15   5  -2   -0.46    0.39
  15   5  -2    0.29    0.52
  15   5  -2   -0.46    0.39
  15   5  -2   -0.03    0.37
 -15   5   2    0.77    0.71
 -14  -5   2    0.85    0.57
  14  -5  -2    1.41    0.68
  14  -5  -2    0.72    0.62
  14   5  -2    1.85    0.81
  14   5  -2    1.85    0.81
 -14   5   2    2.74    0.86
  14   5  -2    0.88    0.51
  14   5  -2    1.51    0.53
  13  -5  -2    5.13    1.07
 -13  -5   2    5.71    0.93
  13  -5  -2    6.58    1.00
  13   5  -2    6.15    1.01
  13   5  -2    5.75    1.32
  13   5  -2    5.75    1.32
  13   5  -2    5.08    0.79
 -13   5   2    6.50    1.14
  12  -5  -2    1.77    0.73
  12  -5  -2    1.52    0.59
 -12  -5   2    2.09    0.60
  12   5  -2    1.74    0.50
  12   5  -2    1.51    0.56
 -12   5   2    2.22    0.67
 -12   5   2    1.85    0.67
 -12   5   2    2.45    1.05
  12   5  -2    0.88    0.59
 -12   5   2    2.45    1.04
  12   5  -2    0.88    0.59
 -11  -5   2   48.79    2.20
  11  -5  -2   51.69    2.69
  11  -5  -2   49.33    2.24
  11   5  -2   49.12    3.22
  11   5  -2   49.85    2.34
 -11   5   2   41.73    3.38
  11   5  -2   49.12    3.22
 -11   5   2   54.57    2.32
 -11   5   2   45.50    2.44
  11   5  -2   53.08    2.13
 -11   5   2   41.73    3.38
  10  -5  -2   48.15    2.12
  10  -5  -2   48.29    2.51
 -10  -5   2   47.54    2.87
 -10  -5   2   47.54    2.87
 -10  -5   2   47.58    2.13
 -10   5   2   50.02    3.51
 -10   5   2   50.02    3.51
  10   5  -2   44.83    2.19
  10   5  -2   48.92    1.99
 -10   5   2   48.06    2.38
  10   5  -2   45.34    2.99
  10   5  -2   45.34    3.00
 -10   5   2   46.49    2.12
  -9  -5   2   14.55    1.79
   9  -5  -2   13.69    1.43
   9  -5  -2   12.55    1.03
  -9  -5   2   12.10    0.99
  -9  -5   2   14.55    1.79
   9   5  -2   12.56    1.04
   9   5  -2   15.54    1.98
   9   5  -2   15.54    1.98
  -9   5   2   15.26    2.23
  -9   5   2   13.92    1.22
  -9   5   2   13.96    1.39
   9   5  -2   15.42    0.99
  -9   5   2   15.26    2.23
  -8  -5   2   32.49    1.38
   8  -5  -2   34.76    1.62
  -8  -5   2   31.00    1.59
  -8  -5   2   37.64    2.36
   8  -5  -2   34.87    1.93
  -8  -5   2   37.64    2.36
   8   5  -2   34.46    1.51
   8   5  -2   30.60    1.63
  -8   5   2   30.15    1.74
   8   5  -2   35.27    2.42
  -8   5   2   28.99    2.50
  -8   5   2   28.99    2.50
   8   5  -2   35.27    2.42
  -8   5   2   34.92    1.65
   7  -5  -2    7.24    0.77
   7  -5  -2    6.74    0.94
  -7  -5   2    8.78    0.64
   7   5  -2    6.38    0.80
   7   5  -2    7.21    0.73
  -7   5   2    9.64    1.65
  -7   5   2    6.09    0.85
   7   5  -2    6.79    1.21
  -7   5   2    9.64    1.65
   7   5  -2    6.79    1.21
  -7   5   2    7.75    0.83
   6  -5  -2    8.49    1.01
  -6  -5   2    8.14    0.84
   6  -5  -2    8.76    0.82
  -6  -5   2    8.16    0.62
   6   5  -2    8.27    1.31
  -6   5   2    9.35    0.88
   6   5  -2    8.55    0.69
  -6   5   2    5.94    1.22
  -6   5   2    7.84    0.93
  -6   5   2    5.94    1.22
   6   5  -2    8.27    1.31
   6   5  -2    7.75    0.85
   5  -5  -2   35.30    1.48
  -5  -5   2   34.37    1.59
  -5  -5   2   33.02    1.34
   5  -5  -2   34.40    1.76
  -5   5   2   35.88    2.47
   5   5  -2   35.53    1.45
  -5   5   2   35.63    1.53
   5   5  -2   38.69    2.36
  -5   5   2   35.88    2.47
  -5   5   2   35.47    1.69
   5   5  -2   38.69    2.36
   5   5  -2   33.22    1.60
  -4  -5   2    3.20    0.42
   4  -5  -2    2.76    0.58
  -4  -5   2    3.29    0.54
   4  -5  -2    3.23    0.47
  -4   5   2    2.74    0.84
  -4   5   2    2.84    0.48
  -4   5   2    4.52    0.66
   4   5  -2    3.33    0.46
   4   5  -2    2.13    0.68
  -4   5   2    2.74    0.84
   4   5  -2    3.14    0.54
   4   5  -2    2.13    0.68
   3  -5  -2  292.74    8.00
  -3  -5   2  286.90    7.66
   3  -5  -2  294.24    7.70
  -3  -5   2  298.31    7.93
  -3   5   2  297.79    7.79
  -3   5   2  295.32    9.41
   3   5  -2  305.39    7.95
   3   5  -2  291.95    7.74
   3   5  -2  298.44    9.35
  -3   5   2  296.69    7.92
   3   5  -2  298.45    9.34
  -3   5   2  295.31    9.41
  -2  -5   2   39.94    2.33
  -2  -5   2   36.93    1.42
  -2  -5   2   39.94    2.33
  -2  -5   2   39.04    1.68
   2  -5  -2   40.67    1.70
   2  -5  -2   35.97    1.39
  -2   5   2   38.44    2.30
   2   5  -2   37.45    1.65
  -2   5   2   37.72    1.48
   2   5  -2   37.25    1.49
  -2   5   2   37.58    1.60
  -2   5   2   38.44    2.30
   2   5  -2   36.69    2.30
   2   5  -2   36.69    2.30
  -1  -5   2  208.39    5.72
  -1  -5   2  216.26    7.22
  -1  -5   2  220.86    6.05
  -1  -5   2  216.25    7.22
   1  -5  -2  208.87    5.89
   1  -5  -2  213.82    5.64
   1   5  -2  222.51    7.29
  -1   5   2  213.07    5.84
  -1   5   2  209.85    7.03
   1   5  -2  222.52    7.29
   1   5  -2  216.90    5.99
  -1   5   2  209.81    7.04
   1   5  -2  210.00    5.79
  -1   5   2  215.01    5.73
   0  -5   2   71.45    2.61
   0  -5   2   73.75    2.36
   0  -5  -2   78.10    2.51
   0  -5   2   72.98    3.47
   0  -5   2   72.97    3.47
   0  -5  -2   75.53    2.23
   0  -5  -2   73.72    2.41
   0   5   2   71.38    2.30
   0   5   2   76.81    2.51
   0   5  -2   70.13    2.39
   0   5  -2   75.25    3.51
   0   5   2   76.88    2.46
   0   5  -2   75.25    3.51
   0   5   2   75.38    3.25
   0   5  -2   72.47    2.60
   0   5   2   75.38    3.25
  -1  -5  -2    8.23    0.63
   1  -5   2    7.25    1.19
   1  -5   2    7.25    1.19
  -1  -5  -2    7.05    0.69
   1  -5   2    8.09    0.65
   1  -5   2    6.24    0.76
   1   5   2    9.39    0.70
   1   5   2    7.82    1.08
   1   5   2    7.82    1.08
   1   5   2    7.46    0.57
  -1   5  -2    7.59    0.80
  -1   5  -2    6.65    1.19
   1   5   2    7.82    0.63
  -1   5  -2    9.67    0.72
  -1   5  -2    6.65    1.19
  -2  -5  -2   37.88    1.47
   2  -5   2   40.49    1.54
   2  -5   2   34.14    2.30
   2  -5   2   34.14    2.31
  -2  -5  -2   41.87    1.54
   2  -5   2   38.85    1.79
   2   5   2   38.02    2.05
   2   5   2   38.10    1.38
  -2   5  -2   37.15    1.53
  -2   5  -2   36.01    2.39
   2   5   2   38.02    2.05
  -2   5  -2   35.29    1.67
   2   5   2   38.28    1.33
   2   5   2   38.53    1.49
  -2   5  -2   36.01    2.40
   2   5   2   38.93    1.52
   3  -5   2   -0.33    0.18
  -3  -5  -2    0.20    0.22
   3  -5   2    0.35    0.31
  -3  -5  -2    0.01    0.18
   3  -5   2    0.37    0.40
   3  -5   2    0.37    0.40
   3   5   2    0.10    0.20
  -3   5  -2    0.28    0.28
   3   5   2    0.25    0.20
  -3   5  -2    0.30    0.31
  -3   5  -2    0.17    0.32
  -3   5  -2    0.17    0.32
   3   5   2    0.77    0.38
   3   5   2    0.19    0.22
   3   5   2    0.30    0.17
   3   5   2    0.77    0.38
   4  -5   2    1.13    0.52
  -4  -5  -2    0.56    0.25
   4  -5   2    1.08    0.34
  -4  -5  -2    0.78    0.29
   4  -5   2    1.13    0.52
   4  -5   2    0.79    0.38
  -4   5  -2    0.36    0.29
  -4   5  -2    0.43    0.35
  -4   5  -2    1.97    0.69
   4   5   2    1.08    0.26
   4   5   2    0.75    0.37
   4   5   2    1.13    0.24
   4   5   2    0.38    0.24
   4   5   2    0.75    0.37
   4   5   2    0.19    0.21
  -4   5  -2    1.97    0.69
   5  -5   2   19.80    2.22
   5  -5   2   18.00    1.26
  -5  -5  -2   17.35    0.91
   5  -5   2   19.79    2.21
   5  -5   2   16.92    1.03
  -5  -5  -2   15.95    0.88
  -5   5  -2   22.93    2.40
  -5   5  -2   13.17    1.07
   5   5   2   16.92    0.92
   5   5   2   16.61    0.85
   5   5   2   13.59    1.43
  -5   5  -2   22.93    2.40
   5   5   2   17.59    0.94
  -5   5  -2   15.47    1.01
   5   5   2   17.62    0.82
   5   5   2   13.59    1.43
   6  -5   2    5.34    1.20
   6  -5   2    6.69    0.76
  -6  -5  -2    7.97    1.00
   6  -5   2    9.10    1.08
  -6  -5  -2    6.41    0.65
  -6  -5  -2    7.97    1.00
  -6  -5  -2    7.99    0.64
   6  -5   2    5.34    1.20
  -6   5  -2    4.98    1.16
   6   5   2    7.84    0.55
   6   5   2    6.31    0.98
  -6   5  -2    7.40    0.94
   6   5   2    5.59    0.56
  -6   5  -2    4.98    1.16
   6   5   2    6.31    0.98
   6   5   2    6.88    0.69
   6   5   2    6.68    0.68
  -6   5  -2    5.95    0.72
  -7  -5  -2   17.78    1.28
  -7  -5  -2   17.79    0.98
  -7  -5  -2   17.78    1.28
   7  -5   2   19.85    1.19
   7  -5   2   14.24    2.02
   7  -5   2   19.05    1.42
   7  -5   2   14.24    2.02
   7   5   2   19.50    1.51
   7   5   2   16.09    0.86
   7   5   2   16.93    0.92
  -7   5  -2   18.57    2.34
  -7   5  -2   17.78    1.14
   7   5   2   16.75    1.00
  -7   5  -2   18.57    2.34
   7   5   2   19.50    1.51
  -7   5  -2   16.55    1.28
   8  -5   2   18.96    2.39
  -8  -5  -2   14.94    1.25
   8  -5   2   18.96    2.39
  -8  -5  -2   19.52    1.06
   8  -5   2   17.71    1.19
  -8  -5  -2   14.94    1.25
   8  -5   2   18.66    1.44
   8   5   2   19.80    1.58
  -8   5  -2   15.25    1.13
  -8   5  -2   20.54    1.42
   8   5   2   20.04    1.12
   8   5   2   19.80    1.58
   8   5   2   18.56    0.95
  -8   5  -2   19.82    2.48
   8   5   2   18.69    0.99
  -8   5  -2   19.82    2.48
  -9  -5  -2    4.04    0.60
   9  -5   2    3.40    0.79
   9  -5   2    4.14    0.71
  -9   5  -2    3.89    0.81
  -9   5  -2    5.24    0.80
   9   5   2    3.38    0.80
  -9   5  -2    5.03    1.32
   9   5   2    3.07    0.49
   9   5   2    3.71    0.61
   9   5   2    3.38    0.80
  -9   5  -2    5.03    1.32
 -10  -5  -2   28.32    1.42
  10  -5   2   27.13    1.89
  10  -5   2   29.79    1.66
  10   5   2   30.05    2.15
 -10   5  -2   25.41    1.76
 -10   5  -2   30.50    3.24
 -10   5  -2   30.50    3.24
  10   5   2   29.57    1.51
  10   5   2   30.05    2.15
  10   5   2   27.88    1.34
 -11  -5  -2    8.90    0.94
  11  -5   2    7.89    1.20
  11  -5   2    7.80    1.03
 -11   5  -2    8.87    1.23
  11   5   2    8.85    1.40
  11   5   2    8.79    0.97
  11   5   2    8.72    0.86
  11   5   2    8.85    1.40
 -12  -5  -2   35.24    1.73
  12  -5   2   33.32    1.92
  12  -5   2   35.93    2.29
  12   5   2   36.40    1.65
  12   5   2   30.06    2.35
  12   5   2   37.08    1.84
 -12   5  -2   32.10    2.10
  12   5   2   30.06    2.34
  13  -5   2    4.24    0.87
  13  -5   2    3.03    0.88
 -13   5  -2    2.50    0.87
  13   5   2    2.27    0.81
  13   5   2    4.55    0.71
  13   5   2    2.27    0.81
  14  -5   2    5.75    1.19
  14  -5   2    6.63    1.08
  14   5   2    5.75    1.26
  14   5   2    5.75    1.26
 -14   5  -2    6.34    1.20
  14   5   2    7.56    0.91
  15  -5   2   19.86    2.11
  15  -5   2   20.05    1.63
  15   5   2   16.83    1.24
 -15   5  -2   17.57    1.95
  15   5   2   13.07    1.99
  15   5   2   13.07    1.99
  16  -5   2    1.21    0.82
  16  -5   2    0.72    0.68
  16   5   2   -0.20    0.51
  16   5   2   -0.57    0.35
  16   5   2   -0.17    0.51
 -16   5  -2   -0.55    0.71
  17  -5   2    0.20    0.74
  17  -5   2   -0.16    0.61
 -17   5  -2   -0.36    0.76
  17   5   2   -0.11    0.42
  18  -6  -2    7.96    1.54
  18   6  -2    7.76    1.15
 -18   6   2    7.92    1.60
  17  -6  -2   -0.33    0.66
  17  -6  -2    0.94    0.82
  17   6  -2    1.04    0.61
 -17   6   2    0.07    0.75
  16  -6  -2    6.46    1.20
  16  -6  -2    6.97    1.45
  16   6  -2    7.10    1.03
  16   6  -2    6.33    1.60
 -16   6   2   10.65    1.67
  16   6  -2    6.33    1.60
 -15  -6   2    1.32    0.69
  15  -6  -2    0.60    0.71
  15  -6  -2    0.63    0.65
  15   6  -2    0.27    0.58
  15   6  -2   -0.25    0.38
 -15   6   2    0.53    0.71
  15   6  -2    0.27    0.58
  15   6  -2   -0.39    0.47
  14  -6  -2    4.14    1.04
 -14  -6   2    3.54    0.83
  14  -6  -2    4.98    0.99
  14   6  -2    3.62    0.85
  14   6  -2    2.36    0.94
 -14   6   2    3.53    0.92
  14   6  -2    4.22    0.78
  14   6  -2    2.36    0.94
 -13  -6   2    6.50    1.01
  13  -6  -2    5.92    1.19
  13  -6  -2    5.72    0.99
 -13   6   2    4.16    0.96
  13   6  -2    5.27    0.83
  13   6  -2    5.89    1.39
  13   6  -2    6.18    1.02
  13   6  -2    5.89    1.39
 -12  -6   2   21.71    1.50
  12  -6  -2   20.49    2.02
  12  -6  -2   21.59    1.54
 -12   6   2   20.63    1.59
 -12   6   2   24.50    3.07
  12   6  -2   16.52    2.29
  12   6  -2   18.56    1.47
 -12   6   2   21.64    1.73
  12   6  -2   21.40    1.37
 -12   6   2   24.50    3.08
  12   6  -2   16.52    2.29
  11  -6  -2   12.18    1.50
 -11  -6   2   13.02    1.29
  11  -6  -2   12.60    1.25
 -11   6   2   10.81    1.19
 -11   6   2   13.80    2.31
 -11   6   2   11.59    1.41
  11   6  -2   12.11    1.29
 -11   6   2   13.80    2.31
  11   6  -2   13.61    1.99
  11   6  -2   12.66    1.05
  11   6  -2   13.61    2.00
  10  -6  -2   17.73    1.29
 -10  -6   2   16.66    1.22
  10  -6  -2   19.74    1.89
 -10   6   2   16.60    1.31
 -10   6   2   14.56    2.27
 -10   6   2   16.78    1.63
  10   6  -2   18.03    2.22
  10   6  -2   18.03    2.22
 -10   6   2   14.56    2.27
  10   6  -2   14.57    1.20
  10   6  -2   16.70    1.14
   9  -6  -2   22.66    1.69
   9  -6  -2   24.24    1.45
  -9  -6   2   23.19    2.39
  -9  -6   2   23.19    2.39
  -9  -6   2   22.31    1.40
   9   6  -2   24.92    2.56
  -9   6   2   24.22    1.49
  -9   6   2   25.63    2.96
   9   6  -2   24.73    1.34
   9   6  -2   23.05    1.46
  -9   6   2   20.57    1.54
  -9   6   2   25.63    2.96
   9   6  -2   24.92    2.56
   8  -6  -2    1.66    0.49
   8  -6  -2    1.16    0.54
  -8   6   2    1.09    0.45
   8   6  -2    2.29    0.77
   8   6  -2    2.29    0.77
  -8   6   2    2.13    0.87
  -8   6   2    0.34    0.36
   8   6  -2    1.00    0.42
   8   6  -2    1.05    0.38
  -8   6   2    2.13    0.87
  -7  -6   2    2.73    0.43
  -7  -6   2    2.39    0.55
   7  -6  -2    3.11    0.73
   7  -6  -2    3.50    0.62
   7   6  -2    1.82    0.69
  -7   6   2    3.32    0.69
   7   6  -2    3.51    0.63
   7   6  -2    3.22    0.52
  -7   6   2    1.35    0.68
  -7   6   2    3.66    0.66
   7   6  -2    1.82    0.69
  -7   6   2    1.35    0.68
   6  -6  -2   10.45    1.18
   6  -6  -2   11.49    0.89
  -6  -6   2    8.91    0.96
  -6  -6   2    9.52    0.71
  -6   6   2   10.00    0.96
   6   6  -2    9.33    1.45
   6   6  -2   10.16    1.02
  -6   6   2   10.85    1.78
   6   6  -2    9.81    0.79
  -6   6   2   10.85    1.78
  -6   6   2   10.46    1.13
   6   6  -2    9.33    1.45
   5  -6  -2   16.73    1.25
  -5  -6   2   15.55    0.91
   5  -6  -2   14.99    0.99
  -5  -6   2   16.32    1.11
  -5   6   2   21.64    2.39
   5   6  -2   16.92    1.95
  -5   6   2   14.04    1.11
   5   6  -2   19.59    1.20
   5   6  -2   18.19    1.04
  -5   6   2   21.64    2.39
   5   6  -2   16.92    1.95
  -5   6   2   16.22    1.07
   4  -6  -2    3.25    0.65
  -4  -6   2    3.17    0.58
  -4  -6   2    3.82    0.50
   4  -6  -2    3.76    0.53
  -4   6   2    2.42    0.54
   4   6  -2    2.61    0.54
   4   6  -2    1.12    0.54
  -4   6   2    3.13    0.90
  -4   6   2    3.10    0.53
  -4   6   2    3.13    0.90
   4   6  -2    4.79    0.60
   4   6  -2    1.12    0.54
  -3  -6   2   54.57    2.26
  -3  -6   2   58.09    2.01
   3  -6  -2   59.18    2.39
   3  -6  -2   58.80    2.05
   3   6  -2   55.69    3.14
   3   6  -2   55.69    3.14
  -3   6   2   62.37    3.33
   3   6  -2   57.16    2.07
  -3   6   2   57.11    2.12
  -3   6   2   62.38    3.33
  -3   6   2   56.06    2.27
   3   6  -2   58.21    2.31
   2  -6  -2   73.91    2.43
   2  -6  -2   78.87    2.82
  -2  -6   2   72.80    2.76
  -2  -6   2   71.02    2.44
  -2   6   2   75.26    2.71
  -2   6   2   77.77    2.56
  -2   6   2   78.25    3.77
   2   6  -2   78.82    2.58
   2   6  -2   79.96    3.83
   2   6  -2   79.96    3.83
   2   6  -2   74.85    2.76
  -2   6   2   78.24    3.77
  -1  -6   2    0.24    0.24
   1  -6  -2    0.10    0.26
  -1  -6   2    0.09    0.29
   1  -6  -2    0.00    0.20
   1   6  -2    0.30    0.26
   1   6  -2    0.51    0.42
  -1   6   2    0.02    0.25
   1   6  -2    0.51    0.42
  -1   6   2    0.31    0.40
  -1   6   2    0.31    0.40
  -1   6   2    0.07    0.23
   1   6  -2   -0.21    0.24
   0  -6  -2   98.51    3.17
   0  -6   2   90.37    2.95
   0  -6  -2   94.78    2.82
   0  -6   2   94.61    3.30
   0   6   2   99.67    3.13
   0   6  -2   93.65    4.33
   0   6   2   92.57    4.06
   0   6   2   94.45    2.93
   0   6   2   92.57    4.06
   0   6  -2   95.12    3.04
   0   6  -2   96.36    3.27
   0   6  -2   93.65    4.34
  -1  -6  -2    7.22    0.53
   1  -6   2    7.07    0.71
   1  -6   2    5.71    0.79
  -1  -6  -2    8.16    0.82
  -1   6  -2    6.11    0.79
   1   6   2    8.34    1.25
  -1   6  -2    8.25    1.36
  -1   6  -2    5.34    0.66
  -1   6  -2    8.25    1.36
   1   6   2    6.48    0.63
   1   6   2    8.34    1.25
   1   6   2    8.70    0.84
   2  -6   2   58.16    2.16
   2  -6   2   62.53    2.54
  -2  -6  -2   62.06    2.22
  -2   6  -2   58.90    3.38
   2   6   2   62.16    3.00
   2   6   2   59.96    2.04
  -2   6  -2   58.90    3.38
   2   6   2   61.29    2.20
   2   6   2   62.16    3.00
  -2   6  -2   63.41    2.25
  -2   6  -2   58.60    2.43
   3  -6   2   14.08    1.14
  -3  -6  -2   13.34    0.88
   3  -6   2   13.89    0.93
  -3   6  -2   14.21    1.10
   3   6   2   14.00    0.89
  -3   6  -2   12.31    0.92
  -3   6  -2   15.02    1.91
   3   6   2   13.89    0.82
   3   6   2   13.81    0.75
   3   6   2   14.46    1.57
   3   6   2   14.46    1.57
  -3   6  -2   15.02    1.91
   4  -6   2   20.95    1.40
   4  -6   2   18.18    2.20
   4  -6   2   18.18    2.20
  -4  -6  -2   21.08    1.09
   4  -6   2   19.43    1.14
  -4   6  -2   21.61    1.37
  -4   6  -2   20.38    1.19
  -4   6  -2   17.60    2.12
  -4   6  -2   17.59    2.12
   4   6   2   18.81    1.52
   4   6   2   20.00    0.94
   4   6   2   19.04    1.06
   4   6   2   18.81    1.52
   4   6   2   19.03    0.97
   5  -6   2    1.68    0.72
  -5  -6  -2    1.62    0.39
   5  -6   2    1.08    0.48
   5  -6   2    1.21    0.40
   5  -6   2    1.68    0.72
   5   6   2    1.52    0.40
   5   6   2    1.01    0.30
  -5   6  -2    1.30    0.43
  -5   6  -2    1.12    0.48
  -5   6  -2    1.15    0.66
   5   6   2    1.13    0.27
   5   6   2    0.36    0.36
   5   6   2    0.36    0.36
  -5   6  -2    1.15    0.66
   6  -6   2    2.19    0.54
   6  -6   2    1.58    0.55
   6  -6   2    2.41    0.82
   6  -6   2    2.41    0.82
   6   6   2    2.50    0.42
  -6   6  -2    2.52    0.89
  -6   6  -2    2.34    0.60
   6   6   2    3.47    0.44
   6   6   2    3.02    0.52
  -6   6  -2    2.60    0.55
   6   6   2    1.47    0.54
  -6   6  -2    2.52    0.89
   6   6   2    1.47    0.54
   7  -6   2    4.91    0.75
  -7  -6  -2    4.74    0.83
  -7  -6  -2    4.74    0.83
  -7  -6  -2    4.49    0.63
   7  -6   2    5.92    1.00
  -7   6  -2    6.96    0.84
   7   6   2    4.47    0.91
  -7   6  -2    4.44    0.84
   7   6   2    4.47    0.91
  -7   6  -2    4.73    1.24
  -7   6  -2    4.73    1.24
   7   6   2    4.08    0.62
   7   6   2    5.30    0.61
   8  -6   2   21.51    1.62
  -8  -6  -2   22.79    1.21
   8  -6   2   24.35    1.44
   8   6   2   21.37    1.12
  -8   6  -2   24.18    1.44
   8   6   2   21.58    1.76
   8   6   2   18.54    1.18
  -8   6  -2   21.19    1.55
  -8   6  -2   24.17    2.82
  -8   6  -2   24.18    2.82
   8   6   2   21.58    1.76
   9  -6   2   22.22    1.45
   9  -6   2   25.42    1.79
  -9  -6  -2   21.15    1.21
  -9   6  -2   21.52    1.61
   9   6   2   19.02    2.01
  -9   6  -2   21.04    2.66
  -9   6  -2   21.04    2.67
   9   6   2   20.05    1.23
  -9   6  -2   22.69    1.49
   9   6   2   19.01    2.01
   9   6   2   22.02    1.16
  10  -6   2   13.09    1.34
  10  -6   2   16.55    1.73
 -10  -6  -2   14.19    1.03
  10   6   2   14.59    1.82
  10   6   2   14.59    1.82
 -10   6  -2   10.79    1.38
  10   6   2   15.50    1.09
  10   6   2   13.86    0.96
 -11  -6  -2   64.05    2.42
  11  -6   2   63.76    2.75
  11  -6   2   58.99    3.09
  11   6   2   57.00    3.34
  11   6   2   58.84    2.29
 -11   6  -2   57.44    2.95
  11   6   2   68.40    2.58
  11   6   2   57.00    3.34
  12  -6   2    0.73    0.56
  12  -6   2   -0.53    0.40
 -12   6  -2   -0.02    0.52
  12   6   2   -0.15    0.32
  12   6   2    0.02    0.31
  12   6   2    0.02    0.31
  13  -6   2   45.10    2.36
  13  -6   2   41.85    2.66
  13   6   2   41.79    1.90
  13   6   2   38.19    2.78
 -13   6  -2   38.49    2.49
  13   6   2   38.19    2.78
  14  -6   2    5.77    1.23
  14  -6   2    5.68    1.07
  14   6   2    6.20    0.86
 -14   6  -2    5.27    1.16
  14   6   2    3.64    1.02
  14   6   2    3.64    1.02
  15  -6   2   -0.54    0.54
  15  -6   2    0.59    0.75
  15   6   2   -0.49    0.41
 -15   6  -2    0.30    0.75
  15   6   2   -0.02    0.41
  15   6   2   -0.49    0.41
  16  -6   2   -0.03    0.70
  16  -6   2   -1.02    0.54
 -16   6  -2   -0.19    0.75
  16   6   2   -0.78    0.35
  17  -6   2   -0.07    0.73
  17  -6   2    0.85    0.71
 -17   6  -2    0.58    0.83
  17   6   2   -0.31    0.40
  18  -7  -2    1.83    1.04
  18   7  -2    4.46    0.96
  17  -7  -2    6.84    1.48
  17  -7  -2   14.68    1.81
  17   7  -2   10.75    1.32
 -17   7   2    8.20    1.53
  16  -7  -2    0.47    0.77
  16  -7  -2    0.18    0.70
 -16   7   2    0.32    0.81
  16   7  -2    0.37    0.51
  16   7  -2    0.52    0.65
  16   7  -2    0.52    0.65
  15  -7  -2   -0.55    0.62
  15  -7  -2   -0.17    0.54
  15   7  -2   -0.45    0.52
  15   7  -2   -0.03    0.44
 -15   7   2    0.48    0.71
  15   7  -2   -0.45    0.52
  14  -7  -2   -0.35    0.54
  14  -7  -2   -0.21    0.61
 -14  -7   2   -0.03    0.53
  14   7  -2    0.58    0.47
  14   7  -2    0.80    0.69
 -14   7   2   -0.24    0.51
  14   7  -2    0.80    0.69
  14   7  -2   -0.47    0.41
 -13  -7   2    0.67    0.58
  13  -7  -2    1.47    0.70
  13  -7  -2    1.89    0.84
  13   7  -2    1.77    0.79
  13   7  -2    1.75    0.58
  13   7  -2    1.77    0.79
 -13   7   2    1.38    0.73
  13   7  -2    1.88    0.69
  12  -7  -2    3.32    0.85
 -12  -7   2    2.57    0.70
  12  -7  -2    1.06    0.67
  12   7  -2    0.25    0.47
 -12   7   2    3.13    1.21
 -12   7   2    3.13    1.21
  12   7  -2    1.71    0.56
  12   7  -2    0.25    0.47
 -12   7   2    3.07    0.88
 -12   7   2    2.34    0.77
  12   7  -2    3.54    0.81
 -11  -7   2   17.97    1.58
  11  -7  -2   13.55    1.72
  11  -7  -2   17.74    1.41
 -11   7   2   16.74    1.54
 -11   7   2   12.24    2.22
 -11   7   2   15.29    1.73
  11   7  -2   14.70    1.48
  11   7  -2   15.96    1.20
  11   7  -2   18.46    2.43
 -11   7   2   12.24    2.22
  11   7  -2   18.46    2.43
  10  -7  -2   35.91    1.93
 -10  -7   2   34.19    1.88
  10  -7  -2   33.48    2.23
  10   7  -2   37.11    1.80
 -10   7   2   38.79    3.95
  10   7  -2   36.10    2.83
 -10   7   2   35.90    1.99
 -10   7   2   34.64    2.16
  10   7  -2   35.81    1.98
 -10   7   2   38.79    3.96
  10   7  -2   36.10    2.83
   9  -7  -2    0.67    0.51
   9  -7  -2    1.77    0.59
  -9  -7   2    1.48    0.54
  -9   7   2    1.29    0.85
  -9   7   2    3.16    0.76
  -9   7   2    1.29    0.85
   9   7  -2    1.61    0.74
   9   7  -2    1.61    0.74
  -9   7   2    1.67    0.61
   9   7  -2    1.43    0.47
   9   7  -2    1.38    0.52
   8  -7  -2   14.57    1.15
   8  -7  -2    9.29    1.25
  -8  -7   2   12.60    1.23
  -8   7   2   13.35    2.19
   8   7  -2   12.93    1.28
   8   7  -2   13.44    1.86
  -8   7   2   13.35    2.19
  -8   7   2   12.51    1.36
   8   7  -2   13.44    1.86
   8   7  -2   15.01    1.04
  -8   7   2   13.65    1.29
  -7  -7   2    7.26    0.93
   7  -7  -2    4.33    0.86
   7  -7  -2    7.38    0.88
   7   7  -2    8.66    0.91
  -7   7   2    9.01    1.75
  -7   7   2    9.42    1.16
  -7   7   2    7.27    0.93
   7   7  -2    6.81    1.36
   7   7  -2    6.81    1.36
  -7   7   2    9.01    1.75
   7   7  -2    6.22    0.88
  -6  -7   2    7.46    0.93
   6  -7  -2    5.98    0.76
   6  -7  -2    8.03    1.13
  -6  -7   2    7.43    0.73
   6   7  -2    5.28    1.17
   6   7  -2    5.28    1.17
   6   7  -2    7.02    0.92
  -6   7   2    8.03    0.94
  -6   7   2    8.83    1.70
  -6   7   2    6.24    0.94
  -6   7   2    8.83    1.70
   6   7  -2    7.64    0.81
  -5  -7   2    0.18    0.32
  -5  -7   2    0.32    0.26
   5  -7  -2   -0.03    0.25
   5  -7  -2   -0.16    0.34
  -5   7   2   -0.33    0.26
   5   7  -2    0.29    0.42
   5   7  -2    0.28    0.28
  -5   7   2    0.18    0.40
  -5   7   2    0.18    0.40
   5   7  -2    0.29    0.43
  -5   7   2   -0.05    0.30
   5   7  -2    0.04    0.29
  -4  -7   2   55.54    2.34
   4  -7  -2   52.16    2.42
   4  -7  -2   53.31    2.08
  -4  -7   2   54.09    2.00
  -4   7   2   53.25    3.38
  -4   7   2   53.25    3.38
   4   7  -2   53.07    2.31
  -4   7   2   50.88    2.31
  -4   7   2   54.22    2.18
   4   7  -2   55.42    3.28
   4   7  -2   55.42    3.28
   4   7  -2   56.76    2.13
   3  -7  -2    5.34    0.84
   3  -7  -2    5.80    0.69
  -3  -7   2    5.42    0.80
  -3  -7   2    4.88    0.59
   3   7  -2    5.87    0.71
   3   7  -2    4.86    0.76
  -3   7   2    6.46    1.36
  -3   7   2    4.48    0.67
   3   7  -2    5.28    1.19
  -3   7   2    4.74    0.75
  -3   7   2    6.45    1.36
   3   7  -2    5.28    1.19
   2  -7  -2   36.45    1.85
  -2  -7   2   37.29    1.58
   2  -7  -2   39.19    1.58
  -2  -7   2   38.67    1.89
  -2   7   2   34.71    2.55
  -2   7   2   39.52    1.68
   2   7  -2   36.98    1.85
   2   7  -2   35.65    2.61
   2   7  -2   40.79    1.71
   2   7  -2   35.65    2.61
  -2   7   2   38.85    1.83
  -2   7   2   34.71    2.55
  -1  -7   2   77.90    2.63
   1  -7  -2   77.99    2.91
  -1  -7   2   73.64    2.95
   1  -7  -2   80.84    2.55
   1   7  -2   75.00    2.92
  -1   7   2   77.65    3.91
  -1   7   2   73.35    2.79
  -1   7   2   78.26    2.65
   1   7  -2   76.26    4.00
  -1   7   2   77.65    3.91
   1   7  -2   80.87    2.74
   1   7  -2   76.26    4.00
   0  -7  -2    0.16    0.21
   0  -7  -2    0.90    0.39
   0  -7   2    0.47    0.30
   0  -7   2    0.22    0.33
   0   7  -2   -0.23    0.27
   0   7   2    0.21    0.34
   0   7   2    0.73    0.34
   0   7  -2    0.62    0.33
   0   7  -2   -0.10    0.31
   0   7   2    0.13    0.25
   0   7   2    0.21    0.34
   0   7  -2   -0.10    0.31
  -1  -7  -2    0.86    0.39
   1  -7   2    0.35    0.30
  -1  -7  -2    0.47    0.23
   1  -7   2    0.27    0.36
  -1   7  -2    0.83    0.57
  -1   7  -2    0.83    0.57
   1   7   2    0.72    0.31
  -1   7  -2    0.72    0.36
   1   7   2    0.29    0.28
  -1   7  -2    0.72    0.39
   1   7   2    0.79    0.54
   1   7   2    0.79    0.54
   2  -7   2    4.13    0.61
  -2  -7  -2    4.29    0.67
   2  -7   2    2.98    0.66
   2   7   2    2.99    0.84
  -2   7  -2    3.82    1.04
   2   7   2    3.64    0.53
  -2   7  -2    2.28    0.56
  -2   7  -2    2.94    0.59
  -2   7  -2    3.82    1.04
   2   7   2    2.99    0.84
   2   7   2    4.26    0.63
  -3  -7  -2   16.88    1.09
   3  -7   2   17.51    1.34
   3  -7   2   20.33    1.18
  -3   7  -2   16.77    2.20
   3   7   2   16.13    1.81
   3   7   2   17.89    1.11
  -3   7  -2   18.44    1.17
   3   7   2   18.96    1.04
   3   7   2   16.13    1.81
  -3   7  -2   19.40    1.36
  -3   7  -2   16.77    2.20
   4  -7   2    5.33    0.88
   4  -7   2    7.03    0.83
  -4  -7  -2    7.59    0.82
   4   7   2    6.14    1.13
   4   7   2    6.75    0.70
  -4   7  -2    6.16    1.31
  -4   7  -2    6.67    0.84
  -4   7  -2    4.87    0.83
   4   7   2    6.14    1.13
   4   7   2    6.48    0.63
   4   7   2    5.77    0.72
  -4   7  -2    6.16    1.31
  -5  -7  -2   64.29    2.37
   5  -7   2   65.46    2.92
   5  -7   2   64.93    2.51
   5   7   2   62.87    2.38
   5   7   2   65.07    2.25
  -5   7  -2   58.74    2.47
  -5   7  -2   64.18    3.97
  -5   7  -2   64.18    3.97
   5   7   2   68.36    3.38
   5   7   2   68.37    3.38
  -5   7  -2   61.50    2.78
  -6  -7  -2   35.36    1.62
   6  -7   2   33.71    2.07
   6  -7   2   37.68    1.81
   6   7   2   34.58    1.51
   6   7   2   33.93    1.63
  -6   7  -2   37.34    2.97
  -6   7  -2   32.70    1.97
  -6   7  -2   36.77    1.82
   6   7   2   37.03    2.39
   6   7   2   37.03    2.39
  -6   7  -2   37.34    2.97
   7  -7   2   17.48    1.71
   7  -7   2   17.04    1.26
  -7   7  -2   20.91    1.38
  -7   7  -2   16.07    1.59
   7   7   2   17.70    1.14
   7   7   2   19.29    2.02
  -7   7  -2   14.30    2.28
  -7   7  -2   14.30    2.28
   7   7   2   17.27    1.03
   7   7   2   19.29    2.02
   8  -7   2    1.41    0.62
   8  -7   2    2.81    0.65
  -8  -7  -2    2.42    0.54
   8   7   2    2.03    0.69
  -8   7  -2    2.10    0.98
   8   7   2    1.44    0.45
  -8   7  -2    1.46    0.61
  -8   7  -2    1.48    0.57
  -8   7  -2    2.10    0.98
   8   7   2    1.71    0.43
   8   7   2    2.03    0.69
   9  -7   2   -0.16    0.41
   9  -7   2    0.27    0.43
  -9  -7  -2    0.80    0.43
  -9   7  -2    0.08    0.48
   9   7   2    0.28    0.39
  -9   7  -2    0.54    0.49
   9   7   2    0.31    0.31
   9   7   2    0.11    0.33
   9   7   2    0.28    0.39
  -9   7  -2    0.08    0.48
  10  -7   2    0.76    0.55
  10  -7   2    1.55    0.72
 -10  -7  -2    1.04    0.49
  10   7   2    0.25    0.37
 -10   7  -2    0.61    0.57
  10   7   2    0.25    0.37
  10   7   2    1.02    0.45
  10   7   2    1.27    0.44
  11  -7   2    0.33    0.53
  11  -7   2   -0.18    0.47
  11   7   2   -0.28    0.19
 -11   7  -2    0.38    0.56
  11   7   2   -0.19    0.29
  11   7   2   -0.28    0.19
  12  -7   2    3.32    0.99
  12  -7   2    4.71    1.00
  12   7   2    6.56    1.34
  12   7   2    5.85    0.79
  12   7   2    6.56    1.34
 -12   7  -2    5.94    1.16
  13  -7   2    7.45    1.34
  13  -7   2   10.70    1.38
  13   7   2    8.98    1.56
 -13   7  -2    8.76    1.44
  13   7   2    9.22    1.01
  13   7   2    8.98    1.56
  14  -7   2    1.22    0.77
  14  -7   2    0.42    0.70
 -14   7  -2    1.87    0.90
  14   7   2    3.23    1.04
  14   7   2    3.23    1.04
  14   7   2    3.62    0.71
  15  -7   2   13.21    1.91
  15  -7   2   11.65    1.57
  15   7   2   14.46    2.10
  15   7   2   12.27    1.24
  15   7   2   14.47    2.10
 -15   7  -2   14.21    1.94
  16  -7   2    0.38    0.67
  16  -7   2    0.07    0.80
  16   7   2    0.94    0.54
 -16   7  -2    0.25    0.74
  17  -8  -2   -0.18    0.87
  17   8  -2    0.59    0.60
  16  -8  -2   14.75    1.80
  16  -8  -2   12.09    1.87
 -16   8   2   13.63    1.97
  16   8  -2   15.17    1.54
  15  -8  -2    0.30    0.70
  15  -8  -2    0.66    0.82
  15   8  -2    1.29    0.59
 -15   8   2   -0.06    0.72
  15   8  -2   -0.22    0.56
  15   8  -2   -0.22    0.56
  14  -8  -2    0.87    0.76
  14  -8  -2   -0.40    0.66
 -14  -8   2    0.68    0.65
  14   8  -2   -0.43    0.48
  14   8  -2    0.04    0.51
  14   8  -2   -0.43    0.48
 -14   8   2    0.06    0.60
  14   8  -2    0.04    0.45
  13  -8  -2    0.27    0.64
  13  -8  -2    0.57    0.69
 -13  -8   2    0.21    0.54
  13   8  -2    0.82    0.67
  13   8  -2    0.82    0.67
  13   8  -2    0.68    0.61
  13   8  -2    0.00    0.42
 -13   8   2    1.32    0.77
  12  -8  -2    3.14    0.86
  12  -8  -2    1.07    0.73
 -12  -8   2    3.00    0.78
  12   8  -2    1.18    0.66
  12   8  -2    2.16    0.63
  12   8  -2    1.53    0.82
 -12   8   2    1.35    0.76
  12   8  -2    1.53    0.82
 -11  -8   2   13.98    1.45
  11  -8  -2   13.45    1.75
  11  -8  -2   14.55    1.46
 -11   8   2   14.42    2.52
 -11   8   2   13.85    1.70
 -11   8   2   19.68    1.78
 -11   8   2   14.42    2.51
  11   8  -2   13.43    1.29
  11   8  -2   13.96    1.46
  11   8  -2   14.03    2.18
  11   8  -2   14.03    2.18
  10  -8  -2   -0.24    0.45
 -10  -8   2    0.07    0.45
  10  -8  -2   -0.20    0.45
  10   8  -2    0.90    0.64
  10   8  -2   -0.17    0.37
 -10   8   2    0.94    0.82
 -10   8   2    0.29    0.45
  10   8  -2    0.90    0.64
  10   8  -2    0.06    0.36
 -10   8   2    0.46    0.56
 -10   8   2    0.94    0.81
   9  -8  -2   45.16    2.20
   9  -8  -2   42.30    2.57
  -9   8   2   40.88    2.43
   9   8  -2   41.84    3.11
   9   8  -2   45.63    2.31
  -9   8   2   49.83    2.36
  -9   8   2   45.09    3.66
   9   8  -2   41.84    3.11
   9   8  -2   46.03    2.08
  -9   8   2   45.09    3.67
  -8  -8   2    4.96    0.87
   8  -8  -2    6.38    1.12
   8  -8  -2    5.28    0.83
  -8   8   2    4.71    0.88
  -8   8   2    3.00    1.15
  -8   8   2    3.00    1.15
  -8   8   2    4.61    0.92
   8   8  -2    4.34    1.18
   8   8  -2    4.34    1.18
   8   8  -2    3.95    0.70
   8   8  -2    5.22    0.89
   7  -8  -2   43.55    2.05
  -7  -8   2   42.66    2.16
   7  -8  -2   44.66    2.48
  -7   8   2   44.77    2.17
   7   8  -2   43.38    2.20
   7   8  -2   43.95    3.13
   7   8  -2   43.95    3.13
  -7   8   2   49.45    3.66
  -7   8   2   49.45    3.66
   7   8  -2   44.03    1.98
   6  -8  -2    2.57    0.59
  -6  -8   2    3.23    0.69
   6  -8  -2    1.32    0.61
  -6   8   2    1.34    0.76
   6   8  -2    3.82    0.75
   6   8  -2    3.40    1.04
   6   8  -2    2.10    0.53
   6   8  -2    3.40    1.04
  -6   8   2    3.51    0.71
  -6   8   2    2.61    0.69
  -6   8   2    1.34    0.76
  -5  -8   2   81.12    2.69
   5  -8  -2   78.37    3.30
   5  -8  -2   71.36    2.76
  -5  -8   2   72.38    2.99
   5   8  -2   70.48    4.10
  -5   8   2   77.23    4.52
   5   8  -2   70.49    4.10
  -5   8   2   77.23    4.52
  -5   8   2   77.59    3.18
   5   8  -2   82.21    3.14
   5   8  -2   80.70    2.84
  -5   8   2   78.80    2.95
  -4  -8   2    6.21    0.92
   4  -8  -2    8.04    1.11
  -4  -8   2    8.05    0.82
   4  -8  -2    9.18    0.93
   4   8  -2    7.03    0.96
  -4   8   2    6.31    0.96
   4   8  -2    8.27    0.88
   4   8  -2    7.65    1.50
   4   8  -2    7.65    1.50
  -4   8   2    8.54    0.96
  -4   8   2   11.49    1.94
  -4   8   2   11.49    1.94
   3  -8  -2   29.44    1.47
   3  -8  -2   30.56    1.81
  -3  -8   2   31.00    1.46
  -3  -8   2   30.59    1.74
  -3   8   2   29.40    1.71
  -3   8   2   31.42    2.60
  -3   8   2   31.77    1.60
   3   8  -2   30.17    3.02
   3   8  -2   28.37    1.50
  -3   8   2   31.41    2.60
   3   8  -2   30.17    3.02
   3   8  -2   31.71    1.78
   2  -8  -2    0.54    0.41
  -2  -8   2    1.05    0.38
   2  -8  -2    1.49    0.41
  -2  -8   2    1.58    0.53
  -2   8   2    1.03    0.63
  -2   8   2    1.03    0.63
   2   8  -2    1.05    0.63
   2   8  -2    1.69    0.53
  -2   8   2    1.59    0.46
   2   8  -2    1.05    0.63
   2   8  -2    0.80    0.39
  -2   8   2    0.75    0.42
   1  -8  -2   40.52    2.05
   1  -8  -2   45.34    1.77
  -1  -8   2   43.23    1.81
  -1  -8   2   41.76    2.15
  -1   8   2   43.23    2.97
  -1   8   2   40.81    1.99
   1   8  -2   38.69    2.05
  -1   8   2   44.41    1.88
   1   8  -2   41.52    3.01
   1   8  -2   41.61    1.89
   1   8  -2   41.51    3.01
  -1   8   2   43.23    2.96
   0  -8   2    5.39    0.89
   0  -8   2    3.73    0.61
   0  -8  -2    4.31    0.56
   0  -8  -2    4.15    0.74
   0   8   2    3.77    0.97
   0   8   2    4.71    0.74
   0   8   2    4.36    0.66
   0   8  -2    4.01    1.15
   0   8  -2    5.17    0.85
   0   8  -2    4.01    1.15
   0   8  -2    3.72    0.66
   0   8   2    3.77    0.97
   1  -8   2   45.36    1.94
   1  -8   2   44.69    2.27
  -1  -8  -2   48.76    1.76
  -1  -8  -2   43.02    2.06
   1   8   2   45.03    2.05
   1   8   2   47.25    1.91
  -1   8  -2   42.40    3.12
  -1   8  -2   42.27    2.18
  -1   8  -2   42.40    3.12
   1   8   2   47.13    3.00
   1   8   2   47.13    3.00
  -1   8  -2   44.14    2.00
  -2  -8  -2    3.42    0.65
   2  -8   2    3.22    0.75
   2  -8   2    4.40    0.69
   2   8   2    3.71    0.58
  -2   8  -2    2.69    0.94
  -2   8  -2    3.41    0.74
   2   8   2    3.42    0.93
   2   8   2    3.32    0.62
  -2   8  -2    2.69    0.94
  -2   8  -2    2.76    0.60
   2   8   2    3.42    0.93
   3  -8   2    2.81    0.60
   3  -8   2    3.00    0.74
  -3  -8  -2    3.35    0.66
   3   8   2    3.39    0.89
   3   8   2    2.46    0.56
  -3   8  -2    2.59    0.66
  -3   8  -2    3.95    1.20
  -3   8  -2    3.95    1.19
   3   8   2    3.39    0.89
  -3   8  -2    2.06    0.57
   3   8   2    2.84    0.52
  -4  -8  -2   67.58    2.55
   4  -8   2   62.65    2.94
   4  -8   2   66.63    2.57
  -4   8  -2   61.66    2.86
   4   8   2   63.73    3.51
   4   8   2   67.78    2.56
  -4   8  -2   58.94    3.97
  -4   8  -2   63.25    2.59
  -4   8  -2   58.94    3.97
   4   8   2   63.73    3.50
   4   8   2   61.95    2.32
   5  -8   2   16.41    1.70
   5  -8   2   19.10    1.30
  -5  -8  -2   21.22    1.29
   5   8   2   19.60    2.15
   5   8   2   19.60    2.15
  -5   8  -2   21.23    2.79
   5   8   2   19.94    1.16
   5   8   2   18.23    1.22
  -5   8  -2   17.06    1.67
  -5   8  -2   21.23    2.79
  -5   8  -2   18.98    1.37
   6  -8   2   73.72    2.83
   6  -8   2   66.49    3.19
  -6  -8  -2   70.63    2.64
  -6   8  -2   66.60    4.39
   6   8   2   69.73    2.51
   6   8   2   72.21    2.69
   6   8   2   65.52    3.60
  -6   8  -2   66.60    4.39
  -6   8  -2   69.23    2.85
  -6   8  -2   68.16    3.12
   6   8   2   65.52    3.60
  -7  -8  -2   20.84    1.28
   7  -8   2   20.94    1.71
   7  -8   2   19.43    1.42
   7   8   2   22.16    2.32
  -7   8  -2   21.96    2.95
   7   8   2   18.81    1.16
  -7   8  -2   20.07    1.46
   7   8   2   19.78    1.28
  -7   8  -2   21.96    2.95
   7   8   2   22.16    2.32
  -7   8  -2   21.25    1.66
   8  -8   2    5.13    0.90
  -8  -8  -2    4.41    0.73
   8  -8   2    4.11    0.96
  -8   8  -2    5.01    0.92
   8   8   2    3.32    0.60
   8   8   2    2.78    0.86
  -8   8  -2    3.41    1.24
  -8   8  -2    3.41    1.24
   8   8   2    2.78    0.86
  -8   8  -2    3.09    0.84
   8   8   2    4.05    0.70
   9  -8   2    1.12    0.67
  -9  -8  -2    2.56    0.62
   9  -8   2    1.20    0.63
   9   8   2    3.35    0.94
  -9   8  -2    1.03    0.63
   9   8   2    3.35    0.94
   9   8   2    1.85    0.48
   9   8   2    2.73    0.63
  10  -8   2    3.32    0.83
  10  -8   2    2.13    0.81
  10   8   2    0.78    0.51
  10   8   2    0.78    0.51
 -10   8  -2    1.77    0.74
  10   8   2    1.66    0.49
  11  -8   2    1.65    0.73
  11  -8   2    1.33    0.73
  11   8   2    2.43    0.56
  11   8   2    1.14    0.59
 -11   8  -2    1.79    0.77
  11   8   2    1.14    0.59
  12  -8   2   -0.35    0.56
  12  -8   2    0.80    0.65
 -12   8  -2    1.22    0.77
  12   8   2   -0.04    0.31
  12   8   2    0.46    0.43
  12   8   2   -0.04    0.31
  13  -8   2    6.80    1.37
  13  -8   2    6.70    1.21
  13   8   2    3.68    1.08
 -13   8  -2    7.12    1.36
  13   8   2    7.13    0.91
  13   8   2    3.68    1.08
  14  -8   2   13.27    1.89
  14  -8   2   10.20    1.46
  14   8   2   11.62    1.92
  14   8   2   11.63    1.18
  14   8   2   11.62    1.92
 -14   8  -2   11.41    1.76
  15  -8   2    1.12    0.80
  15  -8   2   -1.18    0.61
 -15   8  -2    0.07    0.72
  15   8   2    0.20    0.46
  16  -8   2    4.07    1.13
  16   8   2    4.15    0.84
  16  -9  -2   -0.48    0.77
  16   9  -2   -0.37    0.49
  15  -9  -2    1.16    0.87
  15  -9  -2    0.52    0.77
 -15   9   2    1.27    0.80
  15   9  -2    0.93    0.60
  14  -9  -2    1.16    0.88
  14  -9  -2    2.03    0.94
  14   9  -2    1.01    0.60
 -14   9   2    0.94    0.78
  14   9  -2   -0.10    0.60
  14   9  -2   -0.10    0.60
  13  -9  -2    1.43    0.84
 -13  -9   2    0.41    0.63
  13  -9  -2    3.64    1.06
  13   9  -2    2.50    1.04
  13   9  -2    2.63    0.73
 -13   9   2    2.90    0.99
  13   9  -2    1.68    0.75
  13   9  -2    2.50    1.04
  12  -9  -2    3.61    1.06
  12  -9  -2    3.66    0.95
 -12  -9   2    3.83    0.89
 -12   9   2    4.17    1.06
  12   9  -2    2.57    1.08
  12   9  -2    2.48    0.78
  12   9  -2    2.57    1.08
  12   9  -2    2.81    0.73
  11  -9  -2    1.29    0.77
 -11  -9   2    2.28    0.76
  11  -9  -2    2.23    0.81
  11   9  -2    3.32    1.11
  11   9  -2    1.13    0.62
  11   9  -2    3.32    1.12
  11   9  -2    1.67    0.62
 -11   9   2    2.57    0.87
 -11   9   2    1.54    1.04
 -11   9   2    2.55    0.88
 -11   9   2    1.54    1.04
 -10  -9   2   15.87    1.59
  10  -9  -2   12.64    1.41
  10  -9  -2   14.45    1.83
  10   9  -2   12.66    2.08
 -10   9   2   16.97    2.72
 -10   9   2   14.40    1.72
 -10   9   2   15.87    1.61
 -10   9   2   16.97    2.72
  10   9  -2   14.42    1.38
  10   9  -2   17.75    1.70
  10   9  -2   12.66    2.08
  -9  -9   2   -0.23    0.38
   9  -9  -2   -0.66    0.40
   9  -9  -2    0.20    0.51
   9   9  -2    0.00    0.39
  -9   9   2    0.19    0.52
  -9   9   2    0.45    0.63
   9   9  -2    0.26    0.42
   9   9  -2   -0.21    0.40
   9   9  -2   -0.21    0.40
  -9   9   2    0.45    0.63
  -9   9   2   -0.50    0.35
  -8  -9   2   36.42    2.04
   8  -9  -2   32.01    2.25
   8  -9  -2   38.72    2.04
  -8   9   2   32.97    1.99
   8   9  -2   36.43    1.89
  -8   9   2   35.47    2.24
   8   9  -2   38.16    3.05
  -8   9   2   34.49    3.78
   8   9  -2   38.17    3.05
   8   9  -2   32.77    2.02
  -8   9   2   34.50    3.78
   7  -9  -2    1.98    0.76
   7  -9  -2    1.71    0.59
  -7  -9   2    1.54    0.61
   7   9  -2    1.45    0.52
  -7   9   2    1.48    0.63
  -7   9   2    2.98    1.14
   7   9  -2    1.31    0.71
   7   9  -2    1.31    0.71
  -7   9   2    2.98    1.14
   7   9  -2    2.12    0.62
  -7   9   2    1.85    0.63
  -6  -9   2   21.36    1.57
   6  -9  -2   25.35    1.87
   6  -9  -2   23.90    1.48
  -6   9   2   26.78    3.21
  -6   9   2   24.63    1.76
   6   9  -2   20.94    1.56
  -6   9   2   24.54    1.59
   6   9  -2   23.08    1.43
   6   9  -2   19.77    2.51
   6   9  -2   19.77    2.51
  -6   9   2   26.78    3.21
   5  -9  -2    8.87    1.01
  -5  -9   2   10.64    1.26
   5  -9  -2   10.59    1.36
  -5   9   2    9.48    1.87
   5   9  -2    9.93    1.79
  -5   9   2   10.40    1.14
   5   9  -2   11.70    1.14
   5   9  -2   11.43    1.28
  -5   9   2   11.50    1.36
   5   9  -2    9.93    1.79
  -5   9   2    9.48    1.88
   4  -9  -2   32.56    2.03
  -4  -9   2   30.65    1.86
   4  -9  -2   33.34    1.67
   4   9  -2   27.08    1.78
  -4   9   2   31.22    1.91
   4   9  -2   31.08    3.20
  -4   9   2   32.70    1.77
  -4   9   2   36.39    3.02
   4   9  -2   31.09    3.20
   4   9  -2   33.40    1.72
  -4   9   2   36.39    3.02
  -3  -9   2   12.22    1.34
   3  -9  -2   12.01    1.36
  -3  -9   2   12.48    1.00
   3  -9  -2   13.89    1.04
  -3   9   2   11.25    1.26
   3   9  -2   15.65    2.27
   3   9  -2   13.48    1.12
  -3   9   2   13.08    2.08
  -3   9   2   14.85    1.21
   3   9  -2   13.70    1.39
  -3   9   2   13.08    2.08
   3   9  -2   15.65    2.27
   2  -9  -2    0.20    0.44
  -2  -9   2    0.26    0.35
  -2  -9   2    0.34    0.45
   2  -9  -2    0.23    0.32
  -2   9   2    1.00    0.45
   2   9  -2    0.32    0.40
   2   9  -2    0.16    0.48
   2   9  -2    0.16    0.48
  -2   9   2    0.60    0.42
   2   9  -2    0.45    0.43
  -2   9   2    1.20    0.67
  -2   9   2    1.20    0.67
  -1  -9   2   21.10    1.58
  -1  -9   2   22.79    1.35
   1  -9  -2   21.41    1.52
   1   9  -2   23.26    1.43
  -1   9   2   18.48    2.43
  -1   9   2   24.68    1.56
   1   9  -2   20.53    2.57
  -1   9   2   22.02    1.38
  -1   9   2   18.48    2.43
   1   9  -2   20.53    2.57
   1   9  -2   22.79    1.60
   0  -9   2   11.28    1.08
   0  -9  -2   11.53    1.24
   0  -9   2   10.00    1.25
   0   9  -2   12.53    1.19
   0   9   2   10.15    1.14
   0   9   2   11.07    1.08
   0   9   2   10.29    1.74
   0   9   2   10.29    1.74
   0   9  -2    9.70    1.22
   0   9  -2    9.99    1.84
   0   9  -2    9.99    1.84
   1  -9   2    3.74    0.68
  -1  -9  -2    4.88    0.85
   1  -9   2    5.43    0.94
  -1   9  -2    2.62    0.97
  -1   9  -2    2.62    0.97
  -1   9  -2    3.84    0.73
   1   9   2    5.65    1.33
   1   9   2    3.20    0.64
  -1   9  -2    5.97    0.98
   1   9   2    5.57    0.87
   1   9   2    5.65    1.33
  -2  -9  -2    0.83    0.49
   2  -9   2    1.18    0.47
   2  -9   2    1.30    0.56
   2   9   2    1.69    0.74
  -2   9  -2   -0.57    0.33
  -2   9  -2   -0.57    0.33
   2   9   2    1.69    0.74
   2   9   2    1.44    0.50
  -2   9  -2    1.21    0.54
   2   9   2    0.74    0.39
  -2   9  -2    0.67    0.48
  -3  -9  -2    9.08    1.07
   3  -9   2    9.62    1.06
   3  -9   2    8.55    1.24
   3   9   2    8.12    0.91
   3   9   2    7.22    1.43
  -3   9  -2    8.28    1.04
   3   9   2    9.37    1.07
  -3   9  -2    9.59    1.83
  -3   9  -2    9.59    1.83
   3   9   2    7.22    1.43
  -3   9  -2    9.08    1.23
   4  -9   2   -0.26    0.37
  -4  -9  -2    0.21    0.43
   4  -9   2   -0.16    0.37
   4   9   2   -0.02    0.39
  -4   9  -2    0.07    0.41
  -4   9  -2    0.17    0.45
  -4   9  -2   -0.14    0.40
   4   9   2    0.11    0.29
   4   9   2   -0.02    0.39
   4   9   2    0.14    0.30
  -4   9  -2   -0.14    0.40
  -5  -9  -2   38.15    1.91
   5  -9   2   37.64    2.33
   5  -9   2   34.56    1.91
  -5   9  -2   33.92    2.17
  -5   9  -2   45.82    3.60
  -5   9  -2   38.44    2.07
   5   9   2   40.18    1.95
   5   9   2   34.75    2.65
   5   9   2   37.39    1.75
   5   9   2   34.74    2.65
  -5   9  -2   45.82    3.60
   6  -9   2   15.32    1.27
  -6  -9  -2   13.51    1.27
   6  -9   2   12.77    1.58
  -6   9  -2   18.55    2.81
  -6   9  -2   14.88    1.67
   6   9   2   13.92    1.04
  -6   9  -2   18.55    2.81
   6   9   2   10.27    1.65
   6   9   2   10.26    1.65
   6   9   2   13.97    1.29
  -6   9  -2   12.99    1.34
   7  -9   2    5.64    0.94
   7  -9   2    7.55    1.25
  -7  -9  -2    8.41    0.99
   7   9   2    8.54    0.93
  -7   9  -2    6.58    1.67
   7   9   2    9.62    1.09
  -7   9  -2    6.57    1.14
   7   9   2    7.20    1.38
   7   9   2    7.20    1.38
  -7   9  -2    6.00    0.99
  -7   9  -2    6.58    1.67
   8  -9   2    8.88    1.42
   8  -9   2   12.23    1.36
   8   9   2   11.37    1.75
  -8   9  -2   11.44    1.54
  -8   9  -2   10.45    1.29
   8   9   2   11.37    1.75
  -8   9  -2   10.86    2.17
  -8   9  -2   10.86    2.17
   8   9   2   12.29    1.01
   8   9   2   10.42    1.16
   9  -9   2    1.68    0.78
   9  -9   2    2.37    0.77
   9   9   2    0.81    0.43
   9   9   2    0.82    0.51
   9   9   2    0.82    0.51
  -9   9  -2    2.02    0.78
  10  -9   2    0.74    0.66
  10  -9   2    0.46    0.62
  10   9   2    0.04    0.37
 -10   9  -2   -0.10    0.56
  10   9   2   -0.32    0.33
  10   9   2   -0.32    0.33
  11  -9   2    0.86    0.71
  11  -9   2    0.26    0.63
  11   9   2    0.55    0.56
  11   9   2    0.55    0.56
  11   9   2    0.13    0.39
 -11   9  -2   -0.14    0.60
  12  -9   2    1.63    0.87
  12  -9   2    1.47    0.84
  12   9   2    0.01    0.44
  12   9   2    2.81    0.65
 -12   9  -2    2.51    1.01
  12   9   2    0.01    0.44
  13  -9   2    0.38    0.79
  13  -9   2    4.04    1.05
  13   9   2    3.11    0.67
  13   9   2    1.49    0.89
  13   9   2    1.49    0.89
 -13   9  -2    0.19    0.69
  14  -9   2    0.99    0.83
  14  -9   2    1.66    0.90
  14   9   2    0.62    0.52
 -14   9  -2    2.01    1.00
  15  -9   2    4.11    1.23
  15   9   2    6.39    0.98
  15 -10  -2    0.33    0.86
  15  10  -2    0.18    0.55
  14 -10  -2    6.23    1.50
  14 -10  -2    5.07    1.18
 -14  10   2    4.47    1.23
  14  10  -2    4.03    0.87
  13 -10  -2    4.69    1.12
  13 -10  -2    7.37    1.55
  13  10  -2    3.64    0.85
 -13  10   2    3.43    1.06
  13  10  -2    1.90    1.03
  13  10  -2    1.90    1.03
  12 -10  -2    9.39    1.61
  12 -10  -2    9.56    1.39
 -12 -10   2   11.17    1.42
  12  10  -2   12.55    2.32
  12  10  -2   11.05    1.45
  12  10  -2   12.55    2.32
 -12  10   2   11.59    1.70
  12  10  -2   11.17    1.28
  11 -10  -2    3.42    0.96
 -11 -10   2    2.87    0.87
  11 -10  -2    4.71    1.22
 -11  10   2    2.93    1.40
  11  10  -2    4.29    0.94
  11  10  -2    4.62    0.87
  11  10  -2    1.73    0.95
 -11  10   2    2.33    0.90
 -11  10   2    2.56    0.96
 -11  10   2    2.93    1.40
  11  10  -2    1.73    0.95
  10 -10  -2    7.67    1.44
  10 -10  -2    8.07    1.24
  10  10  -2    4.15    1.23
  10  10  -2    7.18    1.19
  10  10  -2    5.88    0.95
 -10  10   2    6.77    1.88
 -10  10   2    6.77    1.88
 -10  10   2    7.34    1.30
 -10  10   2    5.98    1.16
  10  10  -2    4.15    1.23
   9 -10  -2    4.62    0.96
   9 -10  -2    4.70    1.13
  -9 -10   2    3.56    0.91
  -9  10   2    6.49    1.82
   9  10  -2    4.43    0.84
  -9  10   2    5.01    1.06
   9  10  -2    4.30    0.93
  -9  10   2    6.51    1.22
  -9  10   2    6.49    1.83
   9  10  -2    4.84    1.37
   9  10  -2    4.84    1.37
  -8 -10   2   -0.02    0.52
   8 -10  -2    0.22    0.54
   8 -10  -2   -0.10    0.52
  -8  10   2    0.41    0.60
   8  10  -2    0.37    0.56
   8  10  -2    0.78    0.50
  -8  10   2    1.77    1.08
  -8  10   2    1.77    1.08
   8  10  -2    0.37    0.56
   8  10  -2    0.57    0.52
  -8  10   2    0.38    0.51
   7 -10  -2    0.71    0.53
   7 -10  -2   -0.62    0.43
  -7 -10   2    0.09    0.48
  -7  10   2    0.02    0.42
  -7  10   2    0.42    0.68
  -7  10   2    0.45    0.58
   7  10  -2    0.14    0.40
   7  10  -2   -0.05    0.46
   7  10  -2   -0.05    0.46
  -7  10   2    0.42    0.68
   7  10  -2    0.67    0.48
   6 -10  -2    1.76    0.75
  -6 -10   2    2.15    0.72
   6 -10  -2    1.34    0.58
   6  10  -2    2.32    0.97
  -6  10   2    1.15    0.62
   6  10  -2    1.89    0.64
   6  10  -2    2.32    0.97
   6  10  -2    2.96    0.70
  -6  10   2    2.00    0.71
  -6  10   2    1.45    0.90
  -6  10   2    1.45    0.90
   5 -10  -2    6.63    1.18
  -5 -10   2    4.92    0.95
   5  10  -2    5.46    1.42
   5  10  -2    6.28    1.02
  -5  10   2    6.89    1.02
  -5  10   2    6.37    1.12
   5  10  -2    5.90    0.90
  -5  10   2    7.06    1.79
   5  10  -2    5.46    1.43
  -5  10   2    7.06    1.79
   4 -10  -2   11.11    1.45
  -4 -10   2   10.01    1.30
   4  10  -2    8.99    1.20
  -4  10   2    9.14    1.92
  -4  10   2    8.64    1.25
   4  10  -2    7.96    1.69
   4  10  -2    8.77    1.07
  -4  10   2    9.14    1.93
   4  10  -2    7.96    1.69
  -4  10   2   10.03    1.19
   3 -10  -2    9.97    1.36
  -3 -10   2   12.23    1.46
   3  10  -2   12.37    1.45
  -3  10   2   10.76    1.36
  -3  10   2   12.07    1.26
  -3  10   2   14.89    2.40
   3  10  -2   14.30    2.30
   3  10  -2   14.30    2.30
   3  10  -2   13.32    1.29
  -3  10   2   14.89    2.40
  -2 -10   2   74.70    3.35
   2 -10  -2   74.38    3.34
  -2  10   2   75.16    3.28
   2  10  -2   81.42    4.84
  -2  10   2   83.17    3.13
  -2  10   2   78.36    4.75
   2  10  -2   81.41    4.84
  -2  10   2   78.36    4.75
   2  10  -2   79.60    3.11
   2  10  -2   75.81    3.35
   1 -10  -2    9.56    1.23
  -1 -10   2    6.37    1.07
  -1  10   2    8.76    1.71
   1  10  -2    8.97    1.87
  -1  10   2    8.76    1.71
   1  10  -2    8.97    1.87
   1  10  -2    8.54    1.18
  -1  10   2    7.67    0.98
   1  10  -2    8.40    1.05
  -1  10   2    9.14    1.14
   0 -10   2   22.73    1.75
   0 -10   2   25.44    1.52
   0 -10  -2   25.03    1.73
   0  10  -2   26.42    3.08
   0  10  -2   23.87    1.57
   0  10  -2   26.42    3.08
   0  10   2   23.62    2.80
   0  10   2   23.62    2.80
   0  10  -2   23.81    1.74
   0  10   2   23.23    1.63
   0  10   2   22.48    1.45
  -1 -10  -2    2.33    0.71
   1 -10   2    2.48    0.63
   1 -10   2    2.17    0.75
   1  10   2    0.62    0.43
  -1  10  -2    1.95    0.94
   1  10   2    1.06    0.67
  -1  10  -2    2.35    0.71
   1  10   2    1.06    0.67
  -1  10  -2    1.93    0.63
   1  10   2    1.37    0.54
  -1  10  -2    1.95    0.94
   2 -10   2    2.10    0.61
  -2 -10  -2    2.96    0.73
   2 -10   2    3.01    0.82
  -2  10  -2    1.75    0.61
   2  10   2    2.77    1.01
  -2  10  -2    1.72    0.89
  -2  10  -2    2.29    0.71
   2  10   2    2.81    0.71
  -2  10  -2    1.72    0.89
   2  10   2    3.22    0.65
   2  10   2    2.77    1.01
   3 -10   2   31.81    2.17
   3 -10   2   32.01    1.80
  -3 -10  -2   32.05    1.88
  -3  10  -2   32.49    2.12
   3  10   2   32.63    1.70
  -3  10  -2   37.88    3.99
  -3  10  -2   32.02    1.89
   3  10   2   30.41    1.82
   3  10   2   30.43    3.20
  -3  10  -2   37.88    3.99
   3  10   2   30.43    3.20
  -4 -10  -2    7.47    1.05
   4 -10   2    6.00    1.13
   4 -10   2    8.11    1.09
   4  10   2    5.40    1.30
   4  10   2    6.90    0.87
  -4  10  -2    5.53    0.96
   4  10   2    5.40    1.30
  -4  10  -2    6.14    1.62
   4  10   2    9.10    1.13
  -4  10  -2    6.07    1.06
  -4  10  -2    6.14    1.62
  -5 -10  -2    0.73    0.51
   5 -10   2    0.29    0.51
   5 -10   2    0.46    0.51
   5  10   2    0.68    0.54
   5  10   2    0.68    0.54
  -5  10  -2   -0.18    0.51
   5  10   2    0.33    0.40
  -5  10  -2    0.06    0.43
  -5  10  -2   -0.18    0.51
  -5  10  -2   -0.05    0.51
   5  10   2    0.07    0.33
  -6 -10  -2   -0.22    0.44
   6 -10   2    0.41    0.53
   6 -10   2    0.33    0.54
   6  10   2   -0.22    0.39
   6  10   2   -0.02    0.34
  -6  10  -2   -0.04    0.58
  -6  10  -2   -0.20    0.52
  -6  10  -2   -0.04    0.58
   6  10   2   -0.29    0.31
  -6  10  -2    0.32    0.51
   6  10   2   -0.22    0.39
   7 -10   2   37.33    2.13
   7 -10   2   32.89    2.37
  -7 -10  -2   33.48    1.90
   7  10   2   35.57    1.94
  -7  10  -2   30.16    2.22
   7  10   2   30.21    2.60
   7  10   2   30.21    2.60
  -7  10  -2   34.65    2.11
  -7  10  -2   34.46    4.00
   7  10   2   33.71    1.75
  -7  10  -2   34.46    4.00
   8 -10   2    2.38    0.79
   8 -10   2    3.38    0.98
   8  10   2    1.30    0.65
   8  10   2    2.15    0.60
  -8  10  -2    2.69    0.91
   8  10   2    1.30    0.65
   9 -10   2   17.40    2.10
   9 -10   2   18.38    1.79
  -9  10  -2   17.60    2.03
   9  10   2   11.62    1.83
   9  10   2   11.62    1.83
   9  10   2   15.22    1.19
  10 -10   2    1.73    0.80
  10 -10   2    1.20    0.80
  10  10   2    1.15    0.67
  10  10   2    0.55    0.46
  10  10   2    1.15    0.67
 -10  10  -2    0.74    0.71
  11 -10   2   11.00    1.48
  11 -10   2    8.32    1.53
  11  10   2    8.91    1.64
  11  10   2   10.94    1.17
  11  10   2    8.91    1.64
 -11  10  -2    8.84    1.55
  12 -10   2   -0.84    0.60
  12 -10   2   -0.46    0.50
  12  10   2    0.36    0.52
 -12  10  -2    0.04    0.61
  12  10   2    0.36    0.52
  12  10   2   -0.01    0.42
  13 -10   2    3.30    1.07
  13 -10   2    2.48    1.07
 -13  10  -2    4.39    1.29
  13  10   2    3.31    0.76
  14 -10   2    0.42    0.87
  14  10   2    0.70    0.53
  14  11  -2    1.84    0.74
  13 -11  -2    3.60    1.17
 -13  11   2    7.85    1.53
  13  11  -2    6.80    1.07
  12 -11  -2    1.12    0.80
 -12  11   2    0.50    0.70
  12  11  -2    1.01    0.65
 -11 -11   2   13.79    1.67
  11 -11  -2   12.54    1.86
 -11  11   2   15.31    1.95
  11  11  -2   16.48    2.66
  11  11  -2   17.74    1.89
  11  11  -2   16.48    2.66
  11  11  -2   16.12    1.58
  10 -11  -2   -0.79    0.56
  10  11  -2    0.52    0.68
  10  11  -2    0.34    0.62
 -10  11   2   -0.01    0.51
  10  11  -2    0.05    0.49
  10  11  -2    0.52    0.68
 -10  11   2    1.98    0.95
 -10  11   2    1.98    0.95
 -10  11   2   -0.57    0.70
   9 -11  -2   -0.25    0.62
  -9 -11   2    0.56    0.66
  -9  11   2    0.25    0.72
   9  11  -2   -0.69    0.39
  -9  11   2    0.25    0.72
   9  11  -2    1.31    0.86
  -9  11   2   -0.20    0.64
   9  11  -2    1.31    0.86
   9  11  -2   -0.48    0.42
  -9  11   2    0.34    0.56
   8 -11  -2    3.14    1.05
  -8 -11   2    0.63    0.64
   8  11  -2    1.00    0.54
   8  11  -2    1.75    1.02
   8  11  -2    1.75    1.02
  -8  11   2    3.55    0.97
  -8  11   2    1.94    1.16
  -8  11   2    1.94    1.16
  -8  11   2    2.93    0.90
   8  11  -2    3.65    0.97
   7 -11  -2    0.31    0.64
  -7 -11   2    1.13    0.69
   7  11  -2    2.90    1.08
   7  11  -2    2.90    1.08
   7  11  -2    0.78    0.59
   7  11  -2    0.94    0.57
  -7  11   2    0.77    0.76
  -7  11   2    0.77    0.76
  -7  11   2    0.49    0.65
  -7  11   2    0.74    0.57
   6 -11  -2   -0.35    0.53
  -6 -11   2   -0.31    0.49
  -6  11   2    1.05    0.63
   6  11  -2    0.57    0.64
  -6  11   2    0.48    0.73
   6  11  -2    0.57    0.64
   6  11  -2   -0.19    0.41
  -6  11   2    0.48    0.73
   6  11  -2    0.30    0.47
  -6  11   2    0.16    0.59
  -5 -11   2    4.11    0.95
   5 -11  -2    4.25    1.04
   5  11  -2    3.48    0.85
  -5  11   2    2.17    0.76
   5  11  -2    3.12    1.16
   5  11  -2    2.67    0.73
  -5  11   2    2.64    0.79
  -5  11   2    1.58    1.01
  -5  11   2    1.58    1.01
   5  11  -2    3.12    1.15
   4 -11  -2    9.87    1.43
  -4 -11   2   14.05    1.61
  -4  11   2   11.81    2.28
  -4  11   2   11.81    2.28
   4  11  -2   13.64    2.28
   4  11  -2   13.64    2.28
   4  11  -2   11.01    1.27
  -4  11   2   10.64    1.41
   4  11  -2   13.86    1.55
  -4  11   2   11.74    1.33
  -3 -11   2   42.13    2.46
   3 -11  -2   39.28    2.42
   3  11  -2   37.97    2.32
  -3  11   2   38.71    2.33
   3  11  -2   32.13    3.66
  -3  11   2   38.04    2.13
   3  11  -2   32.13    3.66
  -3  11   2   38.75    4.06
  -3  11   2   38.75    4.06
   3  11  -2   42.50    2.16
  -2 -11   2    4.34    0.99
   2 -11  -2    1.27    0.64
  -2  11   2    3.20    1.23
   2  11  -2    3.53    0.79
  -2  11   2    3.20    1.23
  -2  11   2    3.45    0.81
   2  11  -2    1.27    0.89
   2  11  -2    1.45    0.67
   2  11  -2    1.27    0.89
  -2  11   2    0.99    0.58
   1 -11  -2   32.40    2.11
  -1 -11   2   31.05    2.13
  -1  11   2   39.12    3.31
   1  11  -2   35.23    2.04
  -1  11   2   35.02    1.95
   1  11  -2   31.03    3.54
  -1  11   2   31.14    2.02
   1  11  -2   31.03    3.54
  -1  11   2   39.12    3.31
   1  11  -2   32.85    2.17
   0 -11  -2   -0.70    0.38
   0 -11   2    0.66    0.57
   0  11   2   -0.04    0.47
   0  11   2    0.68    0.52
   0  11  -2    0.11    0.62
   0  11  -2   -0.14    0.42
   0  11  -2    0.08    0.46
   0  11   2   -0.32    0.37
   0  11   2   -0.04    0.47
   0  11  -2    0.11    0.62
  -1 -11  -2    1.06    0.65
   1 -11   2    2.06    0.79
  -1  11  -2    1.03    0.59
   1  11   2    0.90    0.70
   1  11   2    0.27    0.44
  -1  11  -2    1.55    0.65
  -1  11  -2    1.22    0.78
   1  11   2    0.90    0.70
  -1  11  -2    1.22    0.78
   1  11   2    1.10    0.54
   2 -11   2   12.04    1.53
  -2 -11  -2   12.74    1.44
   2  11   2   14.07    1.47
  -2  11  -2   10.74    1.34
   2  11   2   10.56    1.17
  -2  11  -2    9.09    1.35
  -2  11  -2    8.36    1.89
  -2  11  -2    8.36    1.89
   2  11   2   10.91    1.98
   2  11   2   10.91    1.98
   3 -11   2    1.19    0.62
  -3 -11  -2    1.72    0.70
   3 -11   2    1.42    0.70
   3  11   2    0.67    0.56
   3  11   2    0.87    0.53
  -3  11  -2    1.65    0.98
   3  11   2    1.49    0.57
  -3  11  -2    1.36    0.66
   3  11   2    0.67    0.56
  -3  11  -2    1.71    0.69
  -3  11  -2    1.65    0.98
   4 -11   2   19.28    2.05
   4 -11   2   18.24    1.49
  -4 -11  -2   20.05    1.55
  -4  11  -2   20.95    3.15
   4  11   2   19.80    1.51
   4  11   2   21.57    1.43
   4  11   2   22.67    2.81
  -4  11  -2   23.79    2.21
   4  11   2   22.67    2.81
  -4  11  -2   15.97    1.62
  -4  11  -2   20.95    3.15
  -5 -11  -2    5.76    1.01
   5 -11   2    7.78    1.38
   5 -11   2    5.48    1.01
  -5  11  -2    5.77    1.75
  -5  11  -2    5.64    1.11
   5  11   2    6.56    0.91
  -5  11  -2    5.77    1.75
  -5  11  -2    9.54    1.45
   5  11   2    7.44    1.11
   5  11   2    4.22    1.23
   5  11   2    4.22    1.23
   6 -11   2   10.32    1.34
   6 -11   2   10.44    1.62
  -6 -11  -2   11.08    1.29
  -6  11  -2   11.41    1.59
   6  11   2    7.83    1.64
   6  11   2    7.83    1.64
   6  11   2    7.03    0.98
  -6  11  -2    9.84    2.23
   6  11   2    9.48    1.22
  -6  11  -2    9.84    2.23
  -6  11  -2    8.66    1.28
   7 -11   2    2.89    0.97
   7 -11   2    4.77    1.02
  -7  11  -2    2.76    1.17
   7  11   2    4.29    0.80
  -7  11  -2    2.76    1.17
   7  11   2    4.73    1.24
  -7  11  -2    2.73    0.88
  -7  11  -2    4.82    1.10
   7  11   2    4.73    1.24
   8 -11   2   18.45    2.18
   8 -11   2   20.57    1.92
   8  11   2   17.66    2.42
   8  11   2   17.66    2.42
  -8  11  -2   17.12    2.04
   8  11   2   17.57    1.33
   9 -11   2    8.92    1.32
   9 -11   2    9.66    1.63
   9  11   2    8.18    1.70
   9  11   2    8.74    1.07
  -9  11  -2    7.08    1.44
   9  11   2    8.18    1.69
  10 -11   2    2.27    0.99
  10 -11   2    4.85    1.14
  10  11   2    3.84    1.16
  10  11   2    3.84    1.16
 -10  11  -2    5.04    1.23
  10  11   2    4.40    0.82
  11 -11   2    0.09    0.68
  11 -11   2   -0.04    0.71
  11  11   2    0.57    0.50
 -11  11  -2    0.32    0.71
  12 -11   2   11.51    1.65
  12  11   2   11.33    1.24
  13 -11   2    1.46    0.98
  13  11   2   -0.01    0.48
  13  12  -2    1.10    0.69
  12  12  -2    1.70    0.77
  11 -12  -2    3.17    1.12
  11  12  -2    3.14    0.87
 -11  12   2    3.22    1.02
  10 -12  -2    1.29    0.79
  10  12  -2    0.60    0.65
  10  12  -2    0.64    0.61
  10  12  -2    1.20    0.81
 -10  12   2    1.60    0.78
  10  12  -2    1.20    0.81
 -10  12   2    0.37    0.80
  -9 -12   2    0.38    0.67
   9 -12  -2   -0.43    0.65
  -9  12   2   -0.13    0.74
   9  12  -2   -0.51    0.58
  -9  12   2    0.16    0.59
   9  12  -2   -0.09    0.49
   9  12  -2   -0.51    0.58
   9  12  -2   -0.07    0.54
  -9  12   2    0.79    0.85
  -9  12   2    0.79    0.85
  -8 -12   2    0.38    0.71
   8 -12  -2    1.05    0.84
   8  12  -2    0.70    0.66
  -8  12   2    0.22    0.66
   8  12  -2    0.33    0.62
  -8  12   2    0.22    0.66
  -8  12   2    0.52    0.74
   8  12  -2    0.32    0.56
  -8  12   2    0.78    0.68
   8  12  -2    0.33    0.62
   7 -12  -2    2.18    0.96
  -7 -12   2    1.90    0.84
  -7  12   2    1.44    0.98
   7  12  -2    2.05    0.71
   7  12  -2    2.39    1.15
   7  12  -2    1.98    0.80
   7  12  -2    2.39    1.15
  -7  12   2    3.29    0.96
  -7  12   2    2.33    0.89
  -7  12   2    1.44    0.98
  -6 -12   2   -0.07    0.63
   6 -12  -2    0.41    0.73
  -6  12   2    0.05    0.67
  -6  12   2    0.06    0.54
   6  12  -2   -0.28    0.45
   6  12  -2   -0.28    0.45
   6  12  -2    0.07    0.50
   6  12  -2   -0.09    0.42
  -6  12   2   -0.13    0.61
  -6  12   2    0.05    0.67
  -5 -12   2   10.46    1.50
   5 -12  -2    8.61    1.48
   5  12  -2   12.50    1.57
  -5  12   2   15.56    2.83
  -5  12   2   15.56    2.83
   5  12  -2    9.37    2.05
   5  12  -2   16.90    1.61
  -5  12   2   13.32    1.55
  -5  12   2   10.17    1.52
   5  12  -2    9.37    2.05
  -4 -12   2    4.79    1.05
   4 -12  -2    3.31    0.97
  -4  12   2    3.90    1.43
   4  12  -2    3.82    1.31
   4  12  -2    5.00    0.95
  -4  12   2    5.81    1.15
   4  12  -2    4.02    0.96
  -4  12   2    3.91    1.43
  -4  12   2    1.44    0.73
   4  12  -2    3.82    1.31
  -3 -12   2   29.63    2.13
   3 -12  -2   25.13    2.02
  -3  12   2   24.54    1.81
   3  12  -2   31.74    3.80
   3  12  -2   24.89    1.76
  -3  12   2   25.69    1.99
  -3  12   2   26.14    3.40
  -3  12   2   26.14    3.41
   3  12  -2   28.29    2.04
   3  12  -2   31.74    3.80
   2 -12  -2   32.87    2.27
  -2 -12   2   30.99    2.23
  -2  12   2   31.50    2.00
  -2  12   2   33.28    3.89
   2  12  -2   33.97    2.04
   2  12  -2   31.75    2.21
   2  12  -2   26.31    3.47
   2  12  -2   26.31    3.48
  -2  12   2   33.28    3.89
  -2  12   2   37.81    2.33
   1 -12  -2    0.27    0.63
  -1 -12   2    2.22    0.84
   1  12  -2    2.04    0.74
  -1  12   2    1.82    0.88
   1  12  -2    0.63    0.69
  -1  12   2    1.51    0.69
  -1  12   2    1.12    0.60
   1  12  -2    1.08    0.66
  -1  12   2    1.82    0.88
   1  12  -2    0.63    0.69
   0 -12  -2    3.53    0.98
   0 -12   2    2.39    0.86
   0  12  -2    0.09    0.63
   0  12  -2    0.09    0.63
   0  12   2    1.14    0.82
   0  12  -2    2.13    0.78
   0  12   2    2.65    0.75
   0  12   2    1.75    0.73
   0  12  -2    1.91    0.78
   0  12   2    1.14    0.82
   1 -12   2    0.29    0.57
  -1 -12  -2    0.35    0.58
  -1  12  -2   -0.02    0.55
   1  12   2    0.48    0.60
   1  12   2   -0.01    0.46
  -1  12  -2    0.56    0.56
   1  12   2    0.48    0.60
   1  12   2    0.63    0.55
  -1  12  -2   -0.33    0.49
  -1  12  -2   -0.33    0.49
   2 -12   2    2.16    0.85
  -2 -12  -2    2.53    0.82
   2  12   2    1.43    0.62
   2  12   2    0.20    0.54
  -2  12  -2    1.25    0.85
   2  12   2    0.20    0.54
  -2  12  -2    0.80    0.64
  -2  12  -2    1.05    0.68
   2  12   2    0.68    0.52
  -2  12  -2    1.25    0.85
  -3 -12  -2    6.20    1.14
   3 -12   2    5.00    1.16
   3  12   2    6.56    1.63
  -3  12  -2    4.29    1.00
  -3  12  -2    5.40    1.67
  -3  12  -2    5.40    1.67
  -3  12  -2    7.39    1.29
   3  12   2    5.87    1.06
   3  12   2    5.53    0.93
   3  12   2    6.56    1.63
   4 -12   2    6.97    1.36
  -4 -12  -2    7.02    1.16
  -4  12  -2    8.04    1.27
  -4  12  -2    6.87    1.32
  -4  12  -2    7.50    1.96
   4  12   2    5.66    1.48
   4  12   2    6.41    1.01
   4  12   2    6.03    1.07
  -4  12  -2    7.50    1.96
   4  12   2    5.66    1.48
   5 -12   2    0.56    0.71
  -5 -12  -2    1.10    0.71
  -5  12  -2    0.35    0.58
   5  12   2    0.97    0.56
  -5  12  -2    1.66    1.09
   5  12   2    0.19    0.53
   5  12   2    1.00    0.64
  -5  12  -2    0.61    0.70
  -5  12  -2    1.66    1.09
   5  12   2    0.19    0.53
   6 -12   2    4.98    1.25
  -6  12  -2    4.34    1.49
   6  12   2    5.39    1.46
  -6  12  -2    4.84    1.15
   6  12   2    5.39    1.46
  -6  12  -2    4.30    1.06
   6  12   2    6.58    1.00
  -6  12  -2    4.34    1.49
   7 -12   2   13.12    1.88
   7  12   2   13.48    2.19
  -7  12  -2    9.99    1.58
   7  12   2   13.60    1.37
   7  12   2   13.48    2.18
   8 -12   2   -0.07    0.54
   8  12   2    0.27    0.48
  -8  12  -2    1.45    0.81
   8  12   2    0.08    0.49
   8  12   2    0.08    0.49
   9 -12   2    0.63    0.64
  -9  12  -2    0.64    0.65
   9  12   2    1.15    0.60
  10 -12   2    0.79    0.82
  10  12   2   -0.23    0.42
  11 -12   2    1.41    0.95
  11  12   2    0.09    0.48
  11  13  -2    0.15    0.60
  10  13  -2    1.96    0.79
   9 -13  -2    1.23    0.91
  -9  13   2    1.20    0.90
   9  13  -2    1.24    0.77
  -9  13   2    1.20    0.90
  -9  13   2    0.27    0.84
   9  13  -2    0.66    0.67
  -9  13   2    1.21    0.80
  -8 -13   2    3.39    1.12
   8 -13  -2    1.55    0.92
   8  13  -2    3.39    1.36
   8  13  -2    3.66    0.93
   8  13  -2    3.39    1.36
  -8  13   2    2.20    1.18
  -8  13   2    3.67    1.09
  -8  13   2    3.67    1.10
   8  13  -2    5.16    1.20
  -8  13   2    2.20    1.18
   7 -13  -2    1.93    0.98
  -7 -13   2    1.60    0.87
   7  13  -2    1.04    0.72
  -7  13   2    1.69    1.12
  -7  13   2    1.69    1.12
   7  13  -2    1.95    1.10
  -7  13   2    1.73    0.93
  -7  13   2    0.58    0.72
   7  13  -2    1.95    1.10
   7  13  -2    2.70    0.83
  -6 -13   2   22.04    2.20
   6 -13  -2   24.77    2.56
   6  13  -2   22.10    3.37
   6  13  -2   23.46    1.83
  -6  13   2   23.39    3.64
   6  13  -2   22.10    3.37
  -6  13   2   23.40    3.64
   6  13  -2   26.38    2.06
  -6  13   2   20.80    2.28
  -6  13   2   28.23    2.12
   5 -13  -2   13.37    1.83
  -5 -13   2   12.25    1.66
  -5  13   2   10.73    1.52
  -5  13   2    5.12    1.67
   5  13  -2    9.40    2.15
  -5  13   2    5.12    1.67
   5  13  -2    9.97    1.36
   5  13  -2    9.40    2.16
  -5  13   2    9.27    1.48
   5  13  -2    8.85    1.41
   4 -13  -2   22.03    2.30
  -4 -13   2   17.71    2.00
  -4  13   2   19.55    2.13
   4  13  -2   20.02    1.66
  -4  13   2   18.81    3.17
  -4  13   2   20.93    1.98
  -4  13   2   18.81    3.16
   4  13  -2   17.30    1.94
  -3 -13   2    0.06    0.65
   3 -13  -2    1.38    0.84
   3  13  -2   -0.36    0.48
  -3  13   2    0.51    0.78
  -3  13   2    0.72    0.63
   3  13  -2   -0.36    0.48
   3  13  -2    0.88    0.68
   3  13  -2    0.02    0.62
  -3  13   2    0.51    0.78
  -3  13   2    0.74    0.70
   2 -13  -2    0.70    0.74
  -2 -13   2    0.15    0.67
  -2  13   2   -0.36    0.55
   2  13  -2    0.14    0.58
   2  13  -2   -0.68    0.55
  -2  13   2   -0.36    0.55
   2  13  -2   -0.68    0.55
   2  13  -2    0.46    0.66
  -2  13   2   -0.72    0.51
  -2  13   2    0.59    0.63
   1 -13  -2    1.71    0.87
  -1 -13   2    2.58    0.97
   1  13  -2    2.36    0.85
   1  13  -2    2.45    1.21
  -1  13   2    2.92    1.24
  -1  13   2    3.46    0.88
   1  13  -2    1.58    0.76
  -1  13   2    2.92    1.24
   1  13  -2    2.45    1.21
  -1  13   2    1.85    0.80
   0 -13  -2   26.15    2.04
   0 -13   2   20.93    2.17
   0  13   2   24.52    1.77
   0  13  -2   18.52    2.04
   0  13   2   17.62    2.88
   0  13  -2   20.47    3.32
   0  13   2   17.62    2.88
   0  13  -2   23.14    1.91
   0  13  -2   20.47    3.31
   0  13   2   21.35    2.08
   1 -13   2    0.28    0.67
  -1 -13  -2   -0.20    0.63
  -1  13  -2    0.29    0.67
  -1  13  -2   -0.30    0.68
  -1  13  -2    0.08    0.55
   1  13   2   -0.11    0.60
   1  13   2   -0.11    0.60
   1  13   2    0.92    0.63
  -1  13  -2   -0.30    0.68
   1  13   2   -0.20    0.45
   2 -13   2    5.83    1.31
  -2 -13  -2    7.91    1.34
  -2  13  -2    7.38    1.42
   2  13   2    4.52    1.45
   2  13   2    5.28    1.09
  -2  13  -2    5.73    1.19
   2  13   2    4.52    1.44
  -2  13  -2    3.91    1.42
   2  13   2    8.85    1.21
  -2  13  -2    3.91    1.42
  -3 -13  -2   10.42    1.50
   3 -13   2   10.40    1.68
  -3  13  -2   17.53    3.12
  -3  13  -2   17.53    3.12
  -3  13  -2   11.58    1.56
   3  13   2   12.53    1.54
   3  13   2    8.13    1.16
   3  13   2    9.55    2.09
   3  13   2    9.55    2.09
   4 -13   2    0.40    0.75
  -4 -13  -2    0.04    0.65
  -4  13  -2    0.19    0.61
   4  13   2    0.04    0.53
   4  13   2    1.14    0.90
   4  13   2    1.14    0.90
  -4  13  -2    1.53    0.88
  -4  13  -2    0.11    0.73
   4  13   2   -0.57    0.40
  -4  13  -2    1.53    0.88
   5 -13   2   16.81    2.10
  -5  13  -2   24.83    2.28
   5  13   2   23.37    1.69
  -5  13  -2   19.88    2.21
   5  13   2   22.74    3.11
   5  13   2   22.74    3.11
   6 -13   2    4.11    1.19
  -6  13  -2    4.21    1.17
   6  13   2    5.71    1.64
   6  13   2    5.71    1.64
  -6  13  -2    4.90    1.19
   6  13   2    3.73    0.85
   7 -13   2   10.28    1.73
   7  13   2    8.89    1.20
  -7  13  -2   10.31    1.70
   8  13   2    6.55    1.08
   9  13   2   -0.20    0.49
  10  13   2    0.00    0.52
  -9  14   2    7.99    1.52
   9  14  -2    7.83    1.30
   8  14  -2    2.19    0.88
  -8  14   2    0.35    1.02
  -8  14   2    2.12    1.06
  -8  14   2    0.35    1.02
  -7 -14   2    3.36    1.14
  -7  14   2    6.20    2.09
  -7  14   2    6.20    2.09
  -7  14   2    3.88    1.18
   7  14  -2    2.24    0.84
   7  14  -2    2.77    1.00
  -6 -14   2    7.01    1.39
   6 -14  -2    4.04    1.22
  -6  14   2    5.56    1.91
   6  14  -2    9.19    1.41
  -6  14   2    6.00    1.28
   6  14  -2    6.29    1.33
  -6  14   2    5.56    1.91
  -6  14   2    8.21    1.45
   5 -14  -2    3.39    1.12
  -5 -14   2    1.36    0.91
   5  14  -2    2.77    1.00
  -5  14   2    2.87    1.05
  -5  14   2    5.65    1.88
   5  14  -2    2.48    1.27
   5  14  -2    3.67    1.01
  -5  14   2    3.80    1.07
  -5  14   2    5.65    1.88
   5  14  -2    2.48    1.27
  -4 -14   2   -0.65    0.66
   4 -14  -2   -0.43    0.67
  -4  14   2    0.15    0.71
   4  14  -2   -0.01    0.73
  -4  14   2    0.27    0.80
   4  14  -2   -0.01    0.73
   4  14  -2    0.92    0.72
  -4  14   2    0.72    0.74
  -4  14   2    0.27    0.80
   4  14  -2    0.39    0.66
   3 -14  -2    1.59    0.95
  -3 -14   2    3.35    1.14
   3  14  -2    5.71    1.82
  -3  14   2    2.98    1.39
   3  14  -2    2.65    0.98
   3  14  -2    2.66    0.93
  -3  14   2    4.12    1.05
   3  14  -2    5.71    1.82
  -3  14   2    2.88    0.98
  -3  14   2    2.98    1.39
   2 -14  -2    1.61    0.94
  -2 -14   2    6.97    1.44
   2  14  -2    4.65    1.13
   2  14  -2    3.02    1.44
  -2  14   2    5.81    1.18
  -2  14   2    6.81    1.33
   2  14  -2    3.02    1.44
   2  14  -2    5.70    1.21
  -2  14   2    3.01    1.38
  -2  14   2    3.01    1.38
   1 -14  -2    0.44    0.75
  -1 -14   2   -0.22    0.68
   1  14  -2    0.74    0.72
   1  14  -2    0.25    0.76
  -1  14   2    0.87    0.76
  -1  14   2    1.44    1.02
   1  14  -2    0.50    0.74
  -1  14   2    1.59    0.80
  -1  14   2    1.44    1.02
   1  14  -2    0.25    0.76
   0 -14   2    1.17    0.81
   0 -14  -2    0.02    0.78
   0  14   2    0.84    0.68
   0  14  -2    1.20    0.85
   0  14  -2   -0.31    0.76
   0  14   2    0.43    0.80
   0  14   2    0.43    0.80
   0  14   2   -0.39    0.60
   0  14  -2   -0.31    0.76
   0  14  -2    1.33    0.81
  -1 -14  -2    3.82    1.13
   1 -14   2   10.08    1.71
  -1  14  -2    5.49    1.30
   1  14   2    4.83    1.04
   1  14   2    4.29    1.50
  -1  14  -2    2.92    1.02
   1  14   2    6.34    1.23
   1  14   2    4.29    1.50
  -1  14  -2    3.22    1.43
  -1  14  -2    3.22    1.43
  -2 -14  -2    0.09    0.75
   2 -14   2   -0.40    0.59
  -2  14  -2    0.26    0.89
   2  14   2   -0.15    0.57
   2  14   2    0.84    0.91
  -2  14  -2    0.26    0.89
   2  14   2    0.84    0.91
  -2  14  -2   -0.12    0.73
  -2  14  -2    1.03    0.73
   2  14   2   -0.22    0.57
  -3 -14  -2    1.74    0.90
   3 -14   2    2.02    0.98
  -3  14  -2    1.02    0.87
   3  14   2    1.63    0.74
  -3  14  -2    0.58    0.86
  -3  14  -2    0.94    0.71
  -3  14  -2    0.58    0.86
   3  14   2    0.79    0.67
   4 -14   2   13.01    1.93
   4  14   2   16.05    1.67
  -4  14  -2   15.10    2.93
  -4  14  -2   14.68    2.02
  -4  14  -2   15.10    2.93
  -4  14  -2   16.52    1.92
  -5  14  -2    5.88    1.34
   5  14   2    3.06    0.85
   6  14   2   21.60    1.71
   7  14   2    7.48    1.19
  -6 -15   2   -0.60    0.66
   6  15  -2   -0.43    0.70
  -6  15   2    0.04    0.89
   6  15  -2    0.88    0.74
  -5 -15   2   -0.85    0.73
  -5  15   2   -0.51    0.84
   5  15  -2    0.48    0.66
   5  15  -2    0.12    0.76
  -4 -15   2    5.95    1.39
  -4  15   2    8.82    1.51
   4  15  -2    7.07    1.37
   4  15  -2    5.50    1.25
   3 -15  -2    3.02    1.17
  -3 -15   2    5.25    1.33
  -3  15   2    6.49    1.35
   3  15  -2    5.78    1.27
  -3  15   2    5.79    1.26
   3  15  -2    5.33    1.20
   2 -15  -2    1.24    0.91
  -2 -15   2   -0.52    0.72
   2  15  -2    0.39    0.61
   2  15  -2    0.01    0.74
  -2  15   2    1.44    0.87
  -2  15   2   -0.19    0.57
   1 -15  -2    1.33    0.96
  -1 -15   2    3.00    1.14
   1  15  -2    1.97    0.89
  -1  15   2    1.97    0.83
   1  15  -2    2.49    1.01
  -1  15   2    4.10    1.07
   0 -15  -2    5.07    1.28
   0  15  -2    5.34    1.31
   0  15   2    5.59    1.23
   0  15   2    6.77    1.25
  -1 -15  -2    0.93    0.86
  -1  15  -2    0.78    0.89
   1  15   2    0.59    0.73
   1  15   2    1.11    0.74
   2  15   2   -0.30    0.65
  -2  15  -2    0.26    0.85
  -3  15  -2    0.34    0.91
   3  15   2    0.76    0.76
   4  15   2    0.20    0.65
  -4  15  -2    0.04    0.94
  20   0  -3    0.61    0.78
  20   0  -3    0.21    0.70
 -20   0   3   -0.20    0.76
  19   0  -3   -0.68    0.60
  19   0  -3    0.25    0.65
 -19   0   3   -1.01    0.62
 -18   0   3    0.29    0.66
  18   0  -3    0.62    0.62
  18   0  -3   -0.21    0.61
  17   0  -3   -0.01    0.54
  17   0  -3    0.00    0.51
 -17   0   3    0.52    0.60
 -16   0   3   -0.13    0.56
  16   0  -3   -0.14    0.43
  16   0  -3   -0.08    0.50
  16   0  -3   -0.55    0.45
  15   0  -3   -0.86    0.34
  15   0  -3   -0.11    0.43
  15   0  -3    0.09    0.41
  15   0  -3   -0.87    0.34
 -15   0   3    0.66    0.52
  14   0  -3   -0.14    0.35
 -14   0   3    0.08    0.39
  14   0  -3    0.20    0.49
  14   0  -3    0.22    0.49
  14   0  -3   -0.22    0.33
 -13   0   3   -0.14    0.36
  13   0  -3    0.20    0.35
  13   0  -3    0.21    0.42
  13   0  -3    0.45    0.45
  13   0  -3    0.21    0.42
 -13   0   3   -0.14    0.36
 -13   0   3    0.22    0.40
  12   0  -3    0.32    0.34
 -12   0   3    0.32    0.35
 -12   0   3   -0.30    0.28
 -12   0   3    0.43    0.50
  12   0  -3    0.22    0.25
  12   0  -3    0.26    0.43
  12   0  -3    0.06    0.44
  12   0  -3    0.06    0.44
 -12   0   3    0.43    0.50
  12   0  -3    0.22    0.25
 -11   0   3   -0.25    0.30
 -11   0   3   -0.33    0.19
  11   0  -3   -0.13    0.22
  11   0  -3    0.46    0.49
  11   0  -3   -0.13    0.22
  11   0  -3    0.16    0.29
 -11   0   3   -0.08    0.27
  11   0  -3    0.46    0.49
 -11   0   3   -0.33    0.19
  11   0  -3   -0.02    0.34
 -10   0   3   -0.12    0.19
 -10   0   3   -0.15    0.24
 -10   0   3   -0.12    0.27
  10   0  -3    0.00    0.25
  10   0  -3    0.02    0.36
  10   0  -3    0.02    0.36
 -10   0   3   -0.12    0.19
  10   0  -3    0.12    0.21
  10   0  -3    0.12    0.21
  10   0  -3    0.17    0.33
  -9   0   3    0.01    0.28
   9   0  -3    0.10    0.18
   9   0  -3   -0.04    0.22
   9   0  -3    0.37    0.40
   9   0  -3    0.10    0.18
  -9   0   3    0.12    0.23
  -9   0   3    0.01    0.28
   9   0  -3    0.00    0.28
  -9   0   3   -0.17    0.20
   9   0  -3    0.37    0.40
  -8   0   3    0.03    0.23
   8   0  -3    0.30    0.28
  -8   0   3   -0.15    0.25
   8   0  -3    0.00    0.22
  -8   0   3   -0.15    0.25
   8   0  -3    0.08    0.28
   8   0  -3    0.55    0.37
   8   0  -3    0.30    0.28
   8   0  -3    0.55    0.37
  -8   0   3    0.07    0.22
   7   0  -3    0.07    0.24
  -7   0   3   -0.25    0.19
   7   0  -3    0.07    0.24
  -7   0   3    0.85    0.41
  -7   0   3   -0.25    0.19
  -7   0   3    0.24    0.22
   7   0  -3    0.05    0.23
  -7   0   3    0.85    0.41
  -7   0   3   -0.09    0.21
   7   0  -3    0.00    0.20
   7   0  -3   -0.27    0.22
   7   0  -3   -0.27    0.22
   6   0  -3    0.23    0.26
  -6   0   3    0.01    0.23
  -6   0   3    0.01    0.23
  -6   0   3   -0.08    0.18
   6   0  -3   -0.13    0.23
  -6   0   3   -0.06    0.26
   6   0  -3    0.72    0.37
   6   0  -3    0.00    0.19
  -6   0   3   -0.24    0.18
   6   0  -3    0.72    0.37
  -6   0   3    0.09    0.21
   6   0  -3   -0.13    0.23
  -6   0   3   -0.06    0.26
   6   0  -3   -0.16    0.15
   5   0  -3   -0.19    0.25
   5   0  -3    0.01    0.23
  -5   0   3   -0.09    0.17
   5   0  -3   -0.13    0.17
   5   0  -3   -0.19    0.25
   5   0  -3   -0.11    0.16
  -5   0   3   -0.32    0.15
  -5   0   3    0.26    0.20
  -5   0   3   -0.32    0.15
  -5   0   3   -0.15    0.27
  -5   0   3    0.28    0.24
   5   0  -3    0.01    0.23
  -5   0   3   -0.15    0.27
   5   0  -3    0.09    0.21
  -4   0   3   -0.17    0.15
  -4   0   3   -0.04    0.19
  -4   0   3   -0.33    0.21
   4   0  -3   -0.27    0.19
   4   0  -3   -0.06    0.16
   4   0  -3   -0.22    0.15
   4   0  -3   -0.42    0.17
  -4   0   3    0.03    0.25
   4   0  -3   -0.27    0.19
   4   0  -3   -0.11    0.20
  -4   0   3   -0.16    0.16
  -4   0   3    0.03    0.25
   4   0  -3   -0.42    0.17
  -4   0   3   -0.33    0.21
   3   0  -3   -0.20    0.14
  -3   0   3   -0.11    0.19
   3   0  -3    0.02    0.21
  -3   0   3   -0.11    0.15
   3   0  -3    0.16    0.26
   3   0  -3    0.02    0.14
  -3   0   3    0.00    0.15
  -3   0   3   -0.11    0.19
  -3   0   3   -0.32    0.22
  -3   0   3    0.22    0.20
   3   0  -3    0.02    0.21
  -3   0   3   -0.32    0.22
   3   0  -3   -0.13    0.17
   3   0  -3    0.16    0.26
  -2   0   3   -0.07    0.13
  -2   0   3   -0.02    0.14
   2   0  -3   -0.20    0.10
  -2   0   3    0.09    0.12
   2   0  -3   -0.04    0.19
   2   0  -3   -0.04    0.19
  -2   0   3    0.06    0.18
  -2   0   3   -0.16    0.19
   2   0  -3    0.16    0.16
  -2   0   3    0.06    0.18
  -2   0   3   -0.16    0.19
   2   0  -3    0.05    0.14
   1   0  -3   -0.02    0.16
   1   0  -3   -0.02    0.16
  -1   0   3   -0.02    0.05
   1   0  -3   -0.03    0.12
   1   0  -3    0.01    0.12
  -1   0   3   -0.03    0.09
   1   0  -3    0.00    0.10
  -1   0   3   -0.13    0.06
  -1   0   3   -0.07    0.11
  -1   0   3   -0.13    0.06
   0   0  -3   -0.02    0.10
   0   0   3   -0.04    0.10
   0   0  -3    0.11    0.14
   0   0  -3    0.11    0.14
   0   0   3    0.01    0.13
   0   0   3    0.01    0.13
   0   0  -3   -0.01    0.11
   0   0   3   -0.03    0.08
   0   0   3   -0.04    0.10
   0   0   3   -0.03    0.08
   1   0   3    0.07    0.10
  -1   0  -3   -0.10    0.14
  -1   0  -3    0.26    0.12
   1   0   3   -0.04    0.17
  -1   0  -3   -0.10    0.14
   1   0   3   -0.12    0.08
   1   0   3   -0.04    0.17
   1   0   3   -0.14    0.11
  -1   0  -3   -0.10    0.11
   1   0   3    0.13    0.11
   2   0   3    0.19    0.15
  -2   0  -3   -0.23    0.16
   2   0   3    0.01    0.19
  -2   0  -3   -0.23    0.16
   2   0   3    0.05    0.11
  -2   0  -3    0.18    0.14
   2   0   3   -0.06    0.11
   2   0   3    0.01    0.19
   2   0   3   -0.05    0.11
  -2   0  -3    0.04    0.12
   3   0   3   -0.14    0.12
   3   0   3   -0.02    0.18
   3   0   3    0.07    0.14
  -3   0  -3   -0.19    0.17
   3   0   3    0.03    0.14
  -3   0  -3   -0.17    0.14
  -3   0  -3    0.02    0.16
   3   0   3   -0.02    0.18
   3   0   3   -0.12    0.16
  -3   0  -3   -0.19    0.17
  -3   0  -3   -0.17    0.14
  -3   0  -3   -0.18    0.13
  -4   0  -3   -0.47    0.13
   4   0   3   -0.14    0.22
   4   0   3   -0.14    0.22
   4   0   3   -0.30    0.13
  -4   0  -3   -0.31    0.17
  -4   0  -3   -0.13    0.20
  -4   0  -3   -0.13    0.20
  -4   0  -3   -0.31    0.17
   4   0   3    0.05    0.15
   4   0   3   -0.18    0.18
  -4   0  -3   -0.29    0.17
   4   0   3   -0.25    0.12
  -5   0  -3    0.03    0.21
   5   0   3   -0.09    0.18
   5   0   3   -0.03    0.13
   5   0   3    0.17    0.17
   5   0   3   -0.03    0.15
  -5   0  -3   -0.15    0.17
   5   0   3   -0.05    0.18
  -5   0  -3    0.03    0.21
  -5   0  -3    0.15    0.19
   5   0   3   -0.05    0.18
   6   0   3   -0.06    0.22
  -6   0  -3   -0.13    0.17
   6   0   3    0.26    0.19
   6   0   3   -0.06    0.22
  -6   0  -3   -0.10    0.18
   6   0   3    0.05    0.21
   6   0   3    0.09    0.16
  -6   0  -3    0.00    0.20
   6   0   3   -0.14    0.14
  -6   0  -3   -0.10    0.18
   7   0   3    0.13    0.20
  -7   0  -3    0.01    0.21
   7   0   3    0.05    0.25
   7   0   3    0.58    0.33
  -7   0  -3   -0.02    0.21
   7   0   3    0.26    0.21
   7   0   3    0.58    0.33
   7   0   3   -0.09    0.14
  -7   0  -3   -0.08    0.18
  -7   0  -3   -0.08    0.18
   8   0   3    0.07    0.25
   8   0   3    0.05    0.17
  -8   0  -3   -0.13    0.24
  -8   0  -3    0.10    0.22
   8   0   3   -0.05    0.20
   8   0   3   -0.05    0.20
   8   0   3    0.09    0.21
  -8   0  -3    0.10    0.22
   9   0   3    0.01    0.21
  -9   0  -3    0.03    0.27
   9   0   3    0.23    0.31
  -9   0  -3    0.30    0.25
   9   0   3    0.01    0.21
   9   0   3    0.13    0.21
   9   0   3   -0.07    0.22
  -9   0  -3    0.30    0.25
  10   0   3    0.08    0.23
 -10   0  -3   -0.28    0.30
  10   0   3   -0.01    0.30
  10   0   3   -0.42    0.21
 -10   0  -3    0.43    0.29
 -10   0  -3    0.43    0.29
  10   0   3    0.08    0.23
  11   0   3   -0.08    0.32
  11   0   3   -0.46    0.24
 -11   0  -3    0.11    0.35
 -12   0  -3    0.06    0.44
  12   0   3    0.08    0.38
  12   0   3    0.12    0.32
  13   0   3   -0.02    0.46
  13   0   3    0.17    0.39
 -13   0  -3   -0.16    0.44
  14   0   3    0.08    0.37
  14   0   3   -0.47    0.43
 -14   0  -3   -0.14    0.53
  15   0   3   -0.11    0.41
  16   0   3   -0.02    0.46
  17   0   3    0.27    0.50
  18   0   3   -0.29    0.47
  20  -1  -3    5.65    1.15
  20  -1  -3    3.99    1.12
  20   1  -3    3.63    0.95
 -20   1   3    4.38    1.18
  19  -1  -3    3.16    1.05
  19  -1  -3    2.81    0.94
 -19  -1   3    2.54    0.97
  19   1  -3    5.15    1.08
 -19   1   3    2.52    1.01
  19   1  -3    1.47    0.85
 -18  -1   3    3.93    1.06
  18  -1  -3    5.88    1.23
  18  -1  -3    4.55    0.99
 -18   1   3    4.50    1.09
  18   1  -3    1.86    1.04
  18   1  -3    5.44    1.22
  18   1  -3    3.54    0.87
  17  -1  -3    3.79    1.00
  17  -1  -3    0.67    0.59
 -17  -1   3    4.81    1.02
  17   1  -3    2.78    1.06
  17   1  -3    1.63    0.65
  17   1  -3    1.31    0.73
 -17   1   3    3.78    1.01
  17   1  -3    2.66    1.06
 -16  -1   3    2.11    0.77
  16  -1  -3    1.26    0.59
  16  -1  -3    0.74    0.62
 -16   1   3    1.00    0.66
  16   1  -3    1.55    0.61
  16   1  -3    1.34    0.68
  16   1  -3    1.61    0.80
  16   1  -3    1.62    0.80
 -15  -1   3   24.84    1.73
  15  -1  -3   23.71    1.59
  15  -1  -3   25.14    1.88
 -15   1   3   20.97    1.65
  15   1  -3   23.34    1.54
  15   1  -3   20.61    2.67
  15   1  -3   24.85    1.84
  15   1  -3   20.61    2.66
  14  -1  -3    0.35    0.52
  14  -1  -3    0.40    0.51
 -14  -1   3    1.04    0.56
  14  -1  -3    1.34    0.53
  14   1  -3    0.65    0.44
  14   1  -3    0.77    0.64
  14   1  -3    0.77    0.64
  14   1  -3    0.76    0.57
 -14   1   3    1.21    0.57
 -13  -1   3    5.72    1.29
  13  -1  -3    5.37    1.35
  13  -1  -3    5.60    0.99
 -13  -1   3    5.02    0.84
 -13  -1   3    5.72    1.29
  13  -1  -3    5.84    0.81
  13   1  -3    5.55    1.34
 -13   1   3    6.24    0.97
  13   1  -3    6.30    0.99
  13   1  -3    5.55    1.35
 -13   1   3    4.00    1.11
  13   1  -3    6.85    0.88
 -13   1   3    4.00    1.11
  12  -1  -3    2.53    0.88
 -12  -1   3    2.60    0.89
  12  -1  -3    3.47    1.01
  12  -1  -3    4.26    0.69
  12  -1  -3    2.50    0.88
  12  -1  -3    3.14    0.74
 -12  -1   3    3.16    0.69
  12  -1  -3    3.47    1.01
 -12  -1   3    2.60    0.89
  12   1  -3    2.85    0.88
  12   1  -3    4.01    0.65
  12   1  -3    4.54    1.14
[truncated: 1,575,178 more chars]
